# Supplementary material for: Dynamics of magma mixing and magma mobilisation beneath Mauna Loa—insights from the 1950 AD Southwest Rift Zone eruption
Source: Springer Nature journal article supplement (doi:10.1007/s00445-023-01680-x), 2023-11-29
Supplement: MOESM1 [file 445_2023_1680_MOESM1_ESM.pdf]

# **Dynamics of magma mixing and magma mobilisation beneath Mauna Loa – insights from the 1950 southwest rift zone eruption**

Maren Kahl<sup>1,\*</sup>, Daniel J. Morgan<sup>2</sup>, Carl Thornber<sup>3</sup>, Richard Walshaw<sup>2</sup>, Kendra J. Lynn<sup>4</sup>,

Frank A. Trusdell<sup>4</sup>

## **Supplementary Material**

### **1. Analytical methods**

#### **1.1 Electron microprobe analysis**

Mineral and glass microanalysis were performed using a JEOL JXA8230 electron probe microanalyzer at the University of Leeds Microscopy and Spectroscopy Centre (LEMAS), a JEOL 8230 SuperProbe electron probe microanalyzer at the Institute of Earth Sciences, University of Iceland, a JEOL8900 electron probe microanalyzer at the USGS Denver Microbeam Facility, and a JEOL SuperProbe JXA-iSP100 electron probe microanalyzer at the Institute of Earth Sciences, Heidelberg University. The following run conditions were used:

**Olivine and pyroxene:** Backscattered electron (BSE) images and quantitative concentration profiles (spacing ~4-7 $\mu$ m) of major and minor elements (olivine: Si, Fe, Mg, Mn, Ca, Ni, Cr; clinopyroxene and orthopyroxene: Si, Fe, Mg, Ca, Al, Na, Ti, Mn, Cr) in a total of 183 olivine and 37 pyroxene (clinopyroxene: 6; orthopyroxene: 31) crystals were obtained using a JEOL JXA8230 electron microprobe analyser at the University of Leeds Microscopy and Spectroscopy Centre (LEMAS). Accelerating voltage of 15kV, 30nA beam current, and fully-focussed spot size for olivine and pyroxene analysis were used. A list of primary standards used for calibration including peak and background count times for olivine and pyroxene are summarized in table 1. Internal data reduction for olivine and pyroxene analysis was performed using the Phi-Rho-Z matrix correction algorithm of Armstrong/Love Scott implemented within

the PFE software package (Donovan et al. 2012) and the Jeol implementation by Paul Carpenter (version 3.50) of the CITZAF (Armstrong 1993) quantitative correction program. Total oxides for olivine and pyroxene range between 98.2 and 103.1 with a mean value of  $100.5 \pm 0.7$  ( $1\sigma$ ) for olivine and  $99.9 \pm 0.8$  ( $1\sigma$ ) for pyroxene. Precision was assessed using EPMA software-calculated 1 sigma count statistic errors (Wieser et al. 2022). Relative analytical precision for olivine is on average <1% for Si, Mg and Fe; ~2.8% for Ca; ~8.8% for Ni and Mn (see Supplementary Data table S2). Accuracy based on repeat analysis of GEO2 MKII olivine standard is on average:  $\pm 1.1\%$  for Si;  $\pm 0.4\%$  for Mg;  $\pm 5.2\%$  for Fe and  $\pm 7.9\%$  for Ni. Elements with low abundance in GEO2 MKII olivine return low accuracy ( $\pm 26\%$ ; see table S2). Relative analytical precision for pyroxene is on average <1% for Si, Fe and Ca; 2.1% for Al; ~4% for Ti and Mg; ~7% for Mn and Cr (see Supplementary Data table S3). Accuracy based on repeat analysis of GEO2 MKII diopside standard is: <1% for Si, Ca and Mg;  $\pm 10.8\%$  for Fe (see table S3).

**Spinel:** Single spot analysis ( $n=181$ ) of Ti, Al, Fe, Mn, Mg, Cr and Ni in a total of 40 spinels were performed using a JEOL 8230 SuperProbe electron microprobe analyser at the Institute of Earth Sciences, University of Iceland. Run conditions were 15keV, 20nA, and a focused beam diameter. A list of primary standards used for calibration including peak and background count times for oxide analysis are included in table 1. Internal data reduction for all spinel analysis was performed using the ZAF correction. Total oxides for spinel range between 96.7 and 100.8, averaging around  $99.1 \pm 0.7$  ( $1\sigma$ ). Precision was assessed using EPMA software-calculated 1 sigma count statistic errors. Relative analytical precision for spinel is <1% for Al, Fe, Mg and Cr; 1.7 % for Ti; ~8% for Ni and 14.3 % for Si (see Supplementary Data table S5).

**Plagioclase:** Single spot analysis ( $n= 175$ ) of major and minor elements (Na, Mg, Al, Si, K, Ca, Fe, Sr and Ba) in a total of 20 plagioclase crystals were performed using the JEOL SuperProbe JXA-iSP100 electron probe microanalyzer at the Institute of Earth Sciences,

Heidelberg University. Run conditions were 15keV, 10nA, and spot size of 10 $\mu$ m. A list of primary standards used for calibration including peak and background count times for plagioclase analysis are included in table 1. Internal data reduction for all plagioclase analyses was performed using the Phi-Rho-Z matrix correction algorithm of Armstrong/Love Scott (Armstrong 1988). Total oxides for plagioclase range between 99.6 and 101.7, averaging around 100.6 $\pm$ 0.4 (1 $\sigma$ ). Precision was assessed using EPMA software-calculated 1 sigma count statistic errors. Relative analytical precision is <1% for Si, Al, Ca; 1.6% for Na; 2.6% for Mg; 3.4% for Fe, and 8.9% for K (see Supplementary Data table S4). Accuracy was monitored by measuring the following secondary standard during each session: Plagioclase (Anorthite) from Great Sitkin Island, Alaska (NMNH137041). Accuracy is:  $\pm$ 0.1% and  $\pm$ 0.5% for Al and Si;  $\pm$ 2.9% and  $\pm$ 3.1% for Ca and Na. Elements with low abundance in NMNH137041 return low accuracy ( $\pm$ 25% or greater; see table S4).

**Groundmass glass:** Single spot analysis (n=422) of Si, Ti, Al, Fe, Mn, Mg, Ca, Na, K, Cr, P, S in 45 groundmass glass were performed using a JEOL8900 electron probe microanalyzer at the USGS Denver Microbeam Facility by C. Thornber. Groundmass glasses were analysed using an accelerating voltage of 15keV, 20nA beam current, and 10-20  $\mu$ m spot size (similar to methods previously reported in Thornber et al. 2002, 2001). A list of primary standards used for calibration including peak and background count times for glass analysis are included table 1. Matrix corrections were performed using a Phi-Rho-Z routine for internal data reduction of all glass analysis. Precisions were estimated by measuring secondary standard basalt glass VG-A99 (USNM 113498-1; Makaopuhi Lava Lake; Jarosewich 2002). Major (>1 wt%) and minor (<1wt%) glass contents were determined with precisions better than 1 $\sigma$  = 4.7% and 11.9%. Accuracy is:  $\pm$ 0.7 and  $\pm$ 0.1% for Mg and Al;  $\pm$ 1.4,  $\pm$ 1.6,  $\pm$ 1.7 and  $\pm$ 1.7 for Ca, Ti, Si and Fe;  $\pm$ 2.1 and  $\pm$ 2.5 for K and Na (see table S7).

**Melt inclusions:** Single spot analysis (n=28) of major and minor elements (Si, Ti, Al, Fe, Mn, Mg, Ca, Na, K, Cr, P) in 20 olivine-hosted, glassy melt inclusions were performed using a JEOL 8230 SuperProbe electron microprobe analyser at the Institute of Earth Sciences, University of Iceland. An accelerating voltage of 15keV, 10nA beam current, and 10 $\mu$ m spot size. Smaller melt inclusions have been measured with a spot size of 5 $\mu$ m. A list of primary standards used for calibration including peak and background count times for glass analysis are included table 1. The CITZAF correction program (Armstrong 1991) was used for internal data reduction of all glass analyses. Total oxides for melt inclusion glass range between 99.85 and 99.87, averaging around 99.86 $\pm$ 0.01 (1 $\sigma$ ). Precision was assessed using EPMA software-calculated 1 sigma count statistic errors. Relative analytical precision for major (>1 wt%) and minor (<1wt%) glass contents is better 2.4% and 13.5%. Accuracy based on repeat analysis of VG-A99 basalt glass standard (USNM 113498-1; from Makaopuhi Lava Lake; Jarosewich 2002) is:  $\pm$ 0.3% for Si;  $\pm$ 1.1% for K and Al;  $\pm$ 1.4%,  $\pm$ 1.6% and  $\pm$ 1.7% for Mg, Ca and Fe;  $\pm$ 2.5% and  $\pm$ 2.8% for Ti and Na (see table S8).



**Table 1:** List of primary standards, spectrometers, analytical crystals, peak and background count times and detection limits (DLs)

|                                     | Element | Spec. | Crystal | Standard                                                                                              | Peak (sec) | Backgr. (sec) | DLs (ppm) |
|-------------------------------------|---------|-------|---------|-------------------------------------------------------------------------------------------------------|------------|---------------|-----------|
| Pyroxene (Probe for EPMA Interface) | Si      | 5     | TAP     | Geo2 Diopside 7308 (natural; Dog Lake, Ontario, Canada)                                               | 20         | 10            | 80        |
|                                     | Ti      | 2     | LIFL    | Geo2 Rutile 7320 (synthetic)                                                                          | 20         | 10            | 240       |
|                                     | Al      | 5     | TAPH    | Geo2 Kyanite 7315 (natural; Collinsville, CT, USA) or Geo2 Kspar 7314 (natural; Lucerne, Switzerland) | 20         | 10            | 80        |
|                                     | Fe      | 4     | LIFH    | Geo2 Fe <sub>2</sub> O <sub>3</sub> (natural; Bouse, La Paz Co, Arizona, USA)                         | 20         | 10            | 200       |
|                                     | Mn      | 4     | LIFH    | Geo2 Rhodonite 7319 (natural; Broken Hill, NSW, Australia)                                            | 20         | 10            | 180       |
|                                     | Mg      | 3     | TAPH    | Geo2 Diopside 7308 (natural; Dog Lake, Ontario, Canada)                                               | 20         | 10            | 100       |
|                                     | Ca      | 1     | PETJ    | Geo2 Diopside 7308 (natural; Dog Lake, Ontario, Canada)                                               | 20         | 10            | 140       |
|                                     | Na      | 3     | TAPH    | Geo 2Jadeite 7313 (natural; Tawmaw, Myanmar)                                                          | 20         | 10            | 110       |
|                                     | Cr      | 2     | LIFL    | Geo2 Cr <sub>2</sub> O <sub>3</sub> 7307 (synthetic)                                                  | 20         | 10            | 230       |
| Pyroxene (Jeol PC-EPMA Interface)   | Si      | 1     | TAP     | Geo2 Diopside 7308 (natural; Dog Lake, Ontario, Canada)                                               | 15         | 7             | 170       |
|                                     | Ti      | 2     | PETL    | Geo2 Rutile 7320 (synthetic)                                                                          | 20         | 10            | 78        |
|                                     | Al      | 5     | TAP     | Geo2 Kyanite 7315 (natural; Collinsville, CT, USA)                                                    | 20         | 10            | 70        |
|                                     | Fe      | 4     | LIFH    | Geo2 Fe <sub>2</sub> O <sub>3</sub> (natural; Bouse, La Paz Co, Arizona, USA)                         | 30         | 15            | 107       |
|                                     | Mn      | 4     | LIFH    | Geo2 Rhodonite 7319 (natural; Broken Hill, NSW, Australia)                                            | 30         | 15            | 106       |
|                                     | Mg      | 3     | TAPH    | Geo2 Diopside 7308 (natural; Dog Lake, Ontario, Canada)                                               | 20         | 10            | 64        |
|                                     | Ca      | 2     | PETL    | Geo2 Diopside 7308 (natural; Dog Lake, Ontario, Canada)                                               | 15         | 7             | 67        |
|                                     | Na      | 3     | TAPH    | Geo 2Jadeite 7313 (natural; Tawmaw, Myanmar)                                                          | 15         | 7             | 99        |
|                                     | Cr      | 4     | LIFH    | Geo2 Cr <sub>2</sub> O <sub>3</sub> 7307 (synthetic)                                                  | 20         | 10            | 124       |
| Olivine (Probe for EPMA Interface)  | Si      | 5     | TAP     | Geo2 Diopside 7308 (natural; Dog Lake, Ontario, Canada)                                               | 20         | 10            | 90        |
|                                     | Ti      | 2     | LIFL    | Geo2 Rutile 7320 (synthetic)                                                                          | 20         | 10            | 240       |
|                                     | Al      | 5     | TAP     | Geo2 Kyanite 7315 (natural; Collinsville, CT, USA)                                                    | 20         | 10            | 90        |
|                                     | Fe      | 4     | LIFH    | Geo2 Fe <sub>2</sub> O <sub>3</sub> (natural; Bouse, La Paz Co, Arizona, USA)                         | 20         | 10            | 190       |
|                                     | Mn      | 4     | LIFH    | Geo2 Rhodonite 7319 (natural; Broken Hill, NSW, Australia)                                            | 20         | 10            | 170       |
|                                     | Mg      | 3     | TAPH    | Geo2 Diopside 7308 (natural; Dog Lake, Ontario, Canada)                                               | 20         | 10            | 100       |
|                                     | Ca      | 1     | PETJ    | Geo2 Diopside 7308 (natural; Dog Lake, Ontario, Canada)                                               | 20         | 10            | 130       |
|                                     | Cr      | 2     | LIFL    | Geo2 Cr <sub>2</sub> O <sub>3</sub> 7307 (synthetic)                                                  | 20         | 10            | 220       |

|                                  |    |   |      |                                                                                     |    |    |     |
|----------------------------------|----|---|------|-------------------------------------------------------------------------------------|----|----|-----|
|                                  | Ni | 2 | LIFL | Geo2 Ni metal 7317 (pure)                                                           | 20 | 10 | 290 |
| Olivine (Jeol PC-EPMA Interface) | Si | 1 | TAP  | Geo2 Almandine 7302 (natural; Roxby, CT, USA)                                       | 40 | 20 | 130 |
|                                  | Ti | 4 | PETH | Geo2 Rutile 7320 (synthetic)                                                        | 20 | 10 | 18  |
|                                  | Al | 3 | TAPH | Geo2 Kyanite 7315 (natural; Collinsville, CT, USA)                                  | 60 | 30 | 12  |
|                                  | Fe | 2 | LIFL | Springwater Meteorite Olivine (USNM 2566)                                           | 40 | 20 | 134 |
|                                  | Mn | 2 | LIFL | Geo2 Rhodonite 7319 (natural; Broken Hill, NSW, Australia)                          | 60 | 30 | 163 |
|                                  | Mg | 5 | TAP  | Springwater Meteorite Olivine (USNM 2566)                                           | 40 | 20 | 83  |
|                                  | Ca | 4 | PETH | Geo2 Diopside 7308 (natural; Dog Lake, Ontario, Canada)                             | 20 | 10 | 40  |
|                                  | Cr | 2 | LIFL | Geo2 Cr2O3 7307 (synthetic)                                                         | 20 | 10 | 160 |
|                                  | Ni | 2 | LIFL | Geo2 Ni metal 7317 (pure)                                                           | 60 | 30 | 126 |
| Plagioclase                      | Si | 5 | TAPL | Anorthite (NMNH 137041)                                                             | 40 | 20 | 63  |
|                                  | Al | 1 | TAP  | Anorthite (NMNH 137041)                                                             | 40 | 20 | 109 |
|                                  | Fe | 3 | LIFL | Hematite (Natural Fe <sub>2</sub> O <sub>3</sub> ; Geo2 Mk II, P&H Developments)    | 40 | 20 | 113 |
|                                  | Mg | 5 | TAPL | Augite (Kakanui) (NMNH 122142)                                                      | 40 | 40 | 28  |
|                                  | Ca | 4 | PETL | Anorthite (NMNH 137041)                                                             | 20 | 10 | 93  |
|                                  | Na | 1 | TAP  | Jadeite (Natural NaAlSi <sub>3</sub> O <sub>6</sub> ; Geo2 Mk II, P&H Developments) | 30 | 15 | 108 |
|                                  | K  | 4 | PETL | Orthoclase (Geo2 Mk II, P&H Developments)                                           | 40 | 20 | 53  |
|                                  | Ba | 2 | PETL | Baryte (Natural BaSO <sub>4</sub> ; Geo2 Mk II, P&H Developments)                   | 40 | 40 | 84  |
|                                  | Sr | 4 | PETL | Celestite (Natural SrSO <sub>4</sub> ; Geo2 Mk II, P&H Developments)                | 40 | 40 | 145 |
| Spinel                           | Si | 1 | TAP  | Pyrope (NMNH 143968)                                                                | 30 | 30 | 73  |
|                                  | Ti | 2 | PETJ | Rutile (Astimex Standards Ltd.)                                                     | 30 | 30 | 151 |
|                                  | Al | 1 | TAP  | Chromite (NMNH 117075)                                                              | 30 | 15 | 58  |
|                                  | Fe | 3 | LIFH | Hematite (Astimex Standards Ltd.)                                                   | 30 | 15 | 119 |
|                                  | Mn | 4 | LIFL | Bustamite (Astimex Standards Ltd.)                                                  | 30 | 30 | 108 |
|                                  | Mg | 5 | TAP  | Hypersthene (USNM 746)                                                              | 30 | 30 | 41  |
|                                  | Cr | 4 | LIFL | Chromite (NMNH 117075)                                                              | 30 | 15 | 117 |
|                                  | Ni | 3 | LIFH | Pentlandite (Astimex Standards Ltd.)                                                | 30 | 30 | 107 |

|                                     | Element | Spec. | Crystal | Standard                                  | Peak (sec) | Backgr. (sec) | DLs (ppm) |
|-------------------------------------|---------|-------|---------|-------------------------------------------|------------|---------------|-----------|
| <b>Groundmass glass</b>             | Si      | 3     | TAP     | Tiburon Albite                            | 20         | 10            | n.a.      |
|                                     | Ti      | 4     | PETJ    | TiO <sub>2</sub> (synthetic)              | 20         | 10            | n.a.      |
|                                     | Al      | 3     | TAP     | Miyake Anorthite                          | 20         | 10            | n.a.      |
|                                     | Fe      | 2     | LIFH    | Fayalite (synthetic)                      | 20         | 10            | n.a.      |
|                                     | Mn      | 2     | LIFH    | Spessartine                               | 20         | 10            | n.a.      |
|                                     | Mg      | 1     | TAP     | Springwater Meteorite Olivine (USNM 2566) | 20         | 10            | n.a.      |
|                                     | Ca      | 4     | PETJ    | Miyake Anorthite                          | 20         | 10            | n.a.      |
|                                     | Na      | 1     | TAP     | Tiburon Albite                            | 20         | 10            | n.a.      |
|                                     | K       | 4     | PETJ    | Or-1A Orthoclase                          | 20         | 10            | n.a.      |
|                                     | P       | 4     | PETJ    | Wilberforce Apatite                       | 20         | 10            | n.a.      |
|                                     | Cr      | 2     | LIFH    | MgCrO <sub>4</sub> (synthetic)            | 20         | 10            | n.a.      |
|                                     | S       | 5     | PETJ    | Barite                                    | 80         | 40            | n.a.      |
| <b>Melt inclusions</b>              | Si      | 1     | TAP     | Tectite Glass (NMNH 2231)                 | 30         | 10            | 159       |
|                                     | Ti      | 2     | PETJ    | Hornblende (Kakanui) (NMNH 143965)        | 40         | 20            | 161       |
|                                     | Al      | 1     | TAP     | Anorthite (NMNH 137041)                   | 30         | 15            | 107       |
|                                     | Fe      | 4     | LIFL    | Garnet (NMNH 87375)                       | 40         | 20            | 164       |
|                                     | Mn      | 4     | LIFL    | Bustamite (Astimex Standards Ltd.)        | 40         | 20            | 145       |
|                                     | Mg      | 5     | TAP     | Diopside Glass (NASA)                     | 30         | 15            | 91        |
|                                     | Ca      | 2     | PETJ    | Diopside Glass (NASA)                     | 30         | 15            | 117       |
|                                     | Na      | 5     | TAP     | Omphacite (NMNH 110607)                   | 20         | 10            | 137       |
|                                     | K       | 2     | PETJ    | Corning Glass D (NMNH 117218-3)           | 40         | 20            | 76        |
|                                     | P       | 2     | PETJ    | Apatite (Astimex Standards Ltd.)          | 40         | 20            | 139       |
| n.a.: No detection limits available |         |       |         |                                           |            |               |           |

## **1.2 Electron backscatter diffraction (EBSD)**

Crystallographic orientations of olivine crystals were determined using electron backscatter diffraction (EBSD, Costa and Chakraborty 2004; Prior et al. 1999) on the FEI Quanta 650 FEGSEM at the University of Leeds Electron Microscopy and Spectroscopy Centre (LEMAS). Constraint of crystallographic directions in olivine with respect to the micro-analytical traverses is essential for accurate diffusion modelling (Costa and Chakraborty 2004), as the diffusivity of different elements (e.g. Fe-Mg or Ni) in olivine is strongly anisotropic, with diffusion along the c-axis six times faster than along the a- and b-axes (e.g. Dohmen et al. 2007a; Clark and Long 1971). To minimize uncertainty in the determination of the orientation data we applied the procedures outlined in Kahl et al. (2017). Instead of single point analyses, orientation maps consisting of hundreds of EBSD point determinations were conducted for each grain. Using the *HKL CHANNEL5* EBSD post-processing software, orientation-maps are generated over an entire crystal, extracting hundreds to thousands of individual orientation measurements.

## **2. Melt inclusions**

### **2.1 Post-entrapment crystallisation correction of melt inclusions**

All melt inclusion (MI) compositions (n=28) were corrected for post-entrapment crystallization (PEC) that took place during natural quenching. Naturally quenched melt inclusions and their host minerals (olivine) were analysed by EMPA. For olivine-hosted MIs the equilibrium between olivine and silicate melt was inspected based on the partitioning of Fe and Mg between these two phases ( $K_D=0.335\pm 0.01$  of Shea et al. 2022). These calculations suggest that all MIs were affected by various degrees of post-entrapment crystallization and diffusion, such that their compositions should be corrected for Fe-loss. For these corrections we determined the forsterite contents of olivines in equilibrium with a range of basaltic liquid compositions (with

MgO-contents ranging between 5.4 and 8.4 wt%; Rhodes 1988; Davis et al. 2003; Couperthwaite et al. 2022) from Mauna Loa (including groundmass glasses from this study) using the same equilibrium criterion stated above (all glass data are provided in table S12). Plotting the FeO-content of these basaltic liquids as the function of Fo-contents of their equilibrium olivines helped us to determine the original FeO-content (FeO\*) of the melt inclusions for each host olivine before post-entrapment modification (Fig. S1). These FeO\*-contents were used as an input parameter for the corrections using the Petrolog3 software of Danyushevsky and Plechov (2011). Corrections were carried out at oxygen fugacity ( $fO_2$ ) conditions of FMQ = 0, using the mineral melt model of Roeder and Emslie (1970) and the  $fO_2$  model of Kress and Carmichael (1988). The corrected MI compositions were plotted again with previously analysed basaltic liquid compositions to verify that MI compositions followed the chemical trends typical of Mauna Loa liquid compositions. The correction procedure provided a good match with Mauna Loa liquid compositions for the majority of melt inclusions hosted in olivines with forsterite contents  $Fo_{82-89}$ .

### **3. Diffusion modelling**

#### **Combined diffusion and growth (CDG) modelling**

The model used is essentially that of Couperthwaite et al (2021). It is a one-dimensional model that starts with an initially homogenous crystal core set at the core plateau value. The exterior of the crystal core is in contact with melt at a specific temperature, and it is the temperature which determines the equilibrium forsterite value to which the crystal edge will equilibrate. In addition, a crystal growth rate operates such that a new growth increment is added at the current equilibrium value when accumulated growth would equal a new "pixel" at the melt interface. Time is iterated incrementally and diffusion (and any necessary growth) applied at each time step; the exterior melt is also allowed to cool, causing the exterior forsterite equilibrium to migrate along a liquidus. This means that the boundary condition at the grain edge is controlled

by the  $T-X_{F_0}$  relation of the external melt, which can be determined using software such as *Petrolog3* (Danyushevsky and Plechov, 2011).

In the original implementation, Couperthwaite et al (2021) used this model type to considerably improve the quality of fit to measured normal zonation profiles than *Autodiff* alone could manage, using variable external boundary conditions coupled to crystal growth. Simply by inputting a higher initial temperature than the core equilibrium, it is possible to start modelling a reverse zone which will, during cooling, migrate into a normal zoned profile at the crystal edge as the temperature descends below that of the core equilibrium. This allows simultaneous modelling of the reverse and normal aspects of a profile, the ultimate shape of which is controlled by three main parameters: the initial peak temperature, the cooling rate, and the crystal growth rate. The instantaneous exterior boundary condition is a function of temperature, and the  $fO_2$  is also dictated by temperature, by reference to a redox buffer (in this case QFM, from Kress and Carmichael 1988). Diffusivity is controlled directly by the temperature, but all the parameters that feed into it are either functions of temperature (external boundary condition, redox condition) or are fixed (diffusion anisotropy and frame of reference within the crystal).

In order to conduct these models, a parameterisation of the equilibrium forsterite composition as a function of magma temperature is necessary. This was calculated using the PEC-corrected composition of the most primitive melt inclusions from sample ML58D as the input melt, and modelling this melt composition using the software *Petrolog3* (Danyushevsky and Plechov 2011) with the crystallisation parameters of Ariskin et al. (1993) for olivine, plagioclase and clinopyroxene to determine the  $T-X_{F_0}$  relationship. The resulting curve was parameterised in several stages and incorporated into the model, with the  $T-X_{F_0}$  path broken into stages to account for kinks that arise due to the saturation of new mineral phases.

The models presented in figure 7 for type 4 and type 5 olivine were all modelled using this combined approach, with manual iteration and solution of the three parameters of maximum

temperature, growth rate, and cooling rate. The full dataset of 12 crystals modelled with a combined diffusion and growth (CDG) model is given in table S10. Growth rates range from zero to a maximum of  $2.7 \times 10^{-10} \text{ ms}^{-1}$ , with most crystals between  $2 \times 10^{-11} \text{ ms}^{-1}$  and  $6 \times 10^{-11} \text{ ms}^{-1}$ . Peak temperatures show a cluster of crystals suggesting peak temperatures of  $\sim 1285^\circ\text{C}$  and another cluster around  $1210^\circ\text{C}$ . Cooling rates are variable, but lie in the range between 0.018 and 0.4 degrees per hour. Altogether these 12 crystals yield combined diffusion and growth times between 4 days and 120 days, comparable to the *Autodiff* models for the more simply-zoned crystals. Expressing an uncertainty on these results is not entirely simple (and would require iteration through the full input parameter space) but we would anticipate it to be at least equal in magnitude to the *Autodiff* data. Work continues on developing the software in a similar manner to that of Mutch et al. (2021). The modelling of the complex profiles using a non-isothermal combined diffusion and growth model shows that more complex modelling is able to reconcile the reverse zones with the immediately adjacent normal-zoned crystal rims in a single cycle of heating and then cooling with growth. It has always been true to say that more complex diffusion models will probably better approach natural reality but it is only recently that this is becoming more commonplace across the many input parameters of initial zoning, temperature history and boundary conditions (e.g., Petrone et al. 2016; Couperthwaite et al. 2021; Mutch et al. 2021; this study).

## 4. Supplementary figures

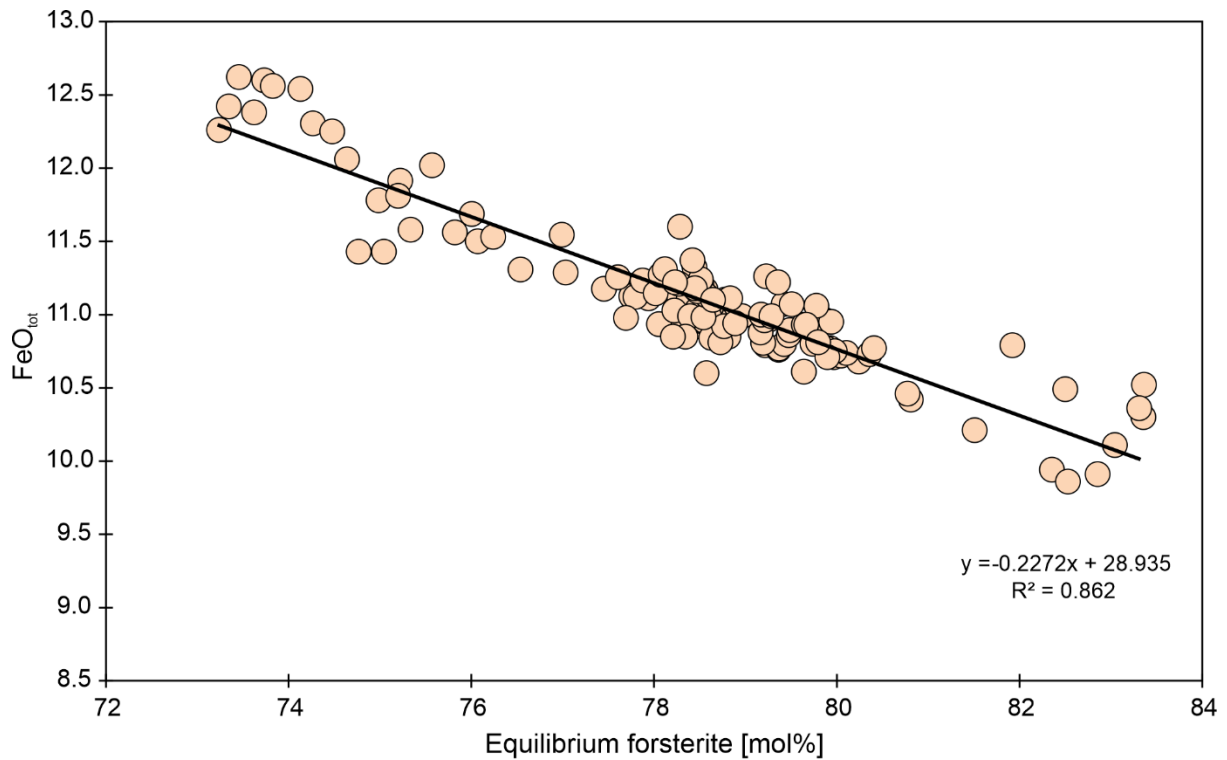

**Supplementary Figure S1. Regression curve for correcting PEC in olivine-hosted melt inclusions.** Equilibrium forsterite content versus FeO<sub>tot</sub> of Mauna Loa glasses (groundmass glasses: Rhodes 1988; Davis et al. 2003; Couperthwaite et al. 2022 and this study; table S12). Equilibrium forsterite content was calculated using the updated  $K_D$  value of  $0.335 \pm 0.01$  of Shea et al. (2022) for tholeiites. The regression equation was used to estimate the original FeO\* of the olivine-hosted melt inclusions at any given forsterite content following the procedure outlined in Kahl et al. (2021) and Caracciolo et al. (2020).



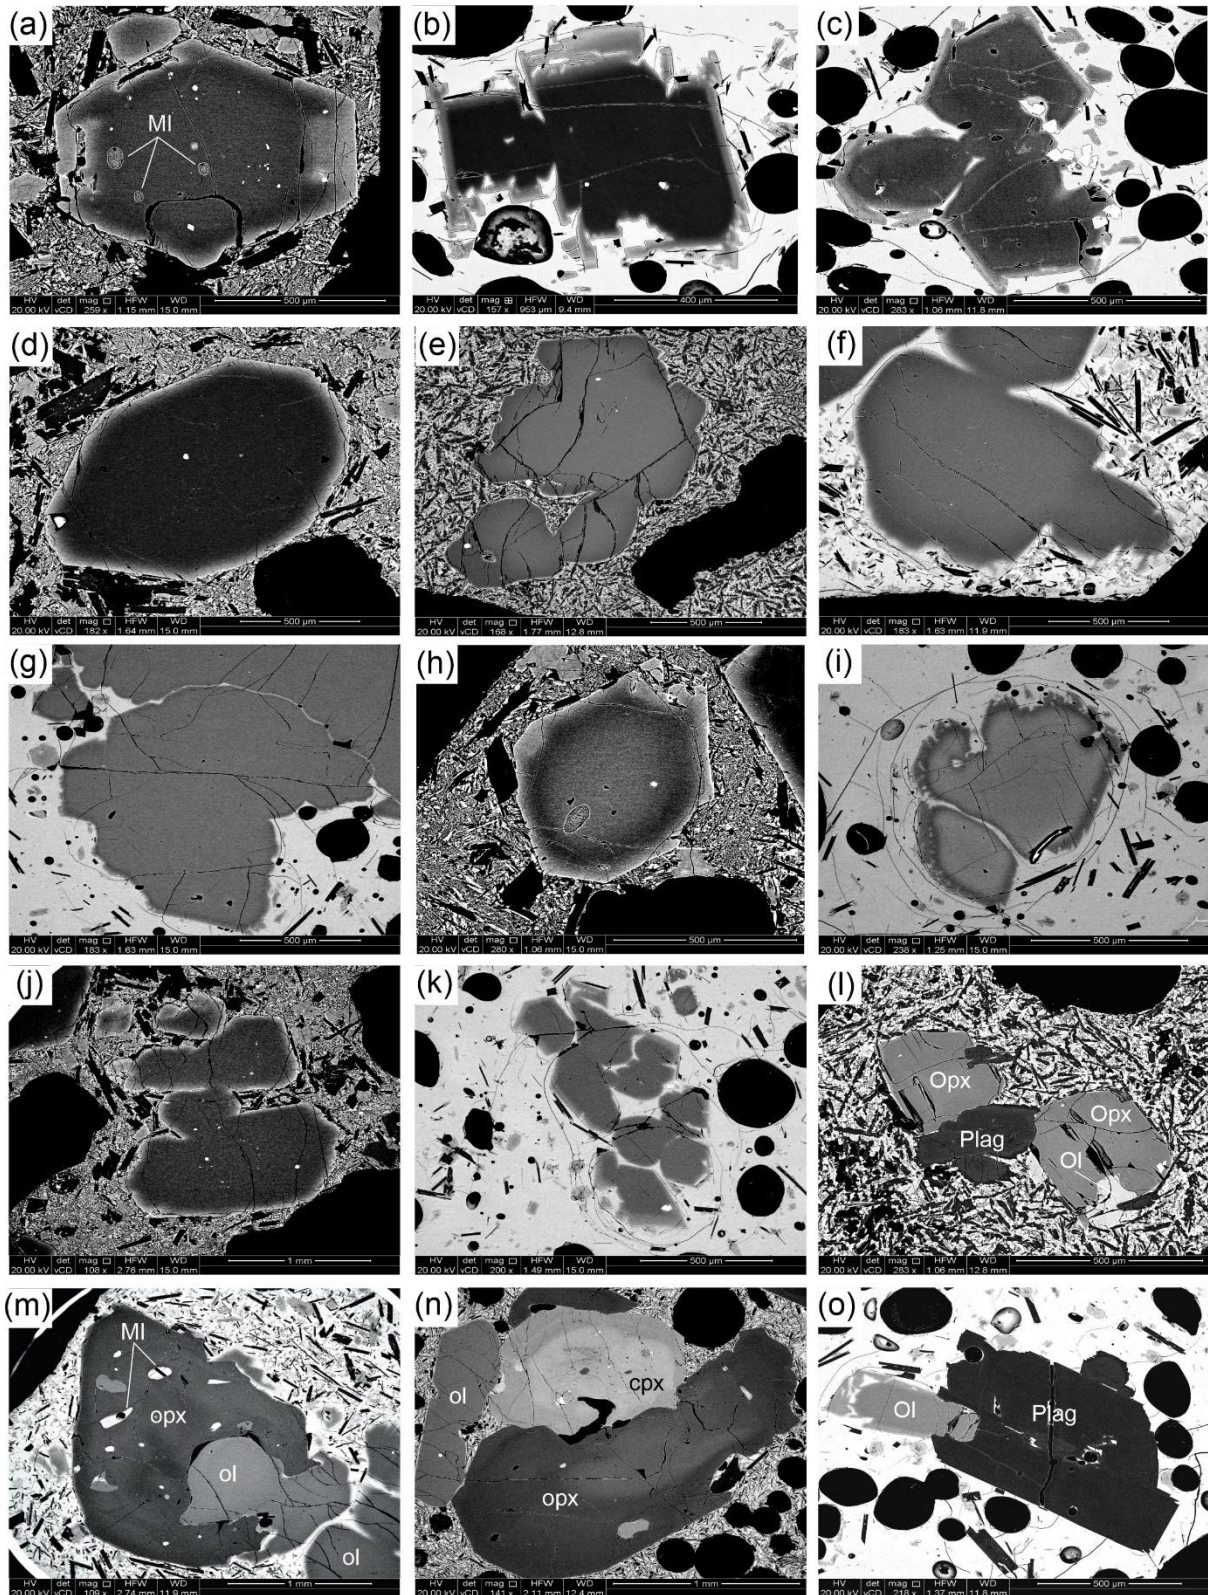

**Supplementary Figure S2. (a-l) Backscatter electron (BSE) images documenting olivine zoning and textural features.** (a-c) Normal and complexly zoned olivine macrocrysts with sub- to anhedral rims with dendritic morphologies indicative of fast growth or fast undercooling. (d-f) Large sub- to anhedral olivine macrocrysts with normal zoning and sub-rounded crystal faces. (g-i) Reversely zoned olivine macrocrysts with low-forsterite cores overgrown by forsterite-rich rims. (j-o) Glomerophyric textures. (j-k) Cluster of normally zoned, polyhedral olivines with sub- to anhedral sub-rounded rims. (l) Polymineralsic clot orthopyroxene, plagioclase and olivine. (m) Poikilitic large orthopyroxene

macrocryst (Mg-rich) including melt inclusions and olivine. Note intergrowth with large anhedral olivine. Anhedral and sub-rounded crystal faces. (n) Polymineralic, gabbroitic clot of complexly zoned orthopyroxene, reversely zoned clinopyroxene and olivine. (o) Troctolitic glomerocryst of normally zoned olivine and plagioclase. Dendritic olivine rims. Ol: Olivine; Cpx: Clinopyroxene; Opx: Orthopyroxene; Plag: Plagioclase; MI: Melt inclusion.



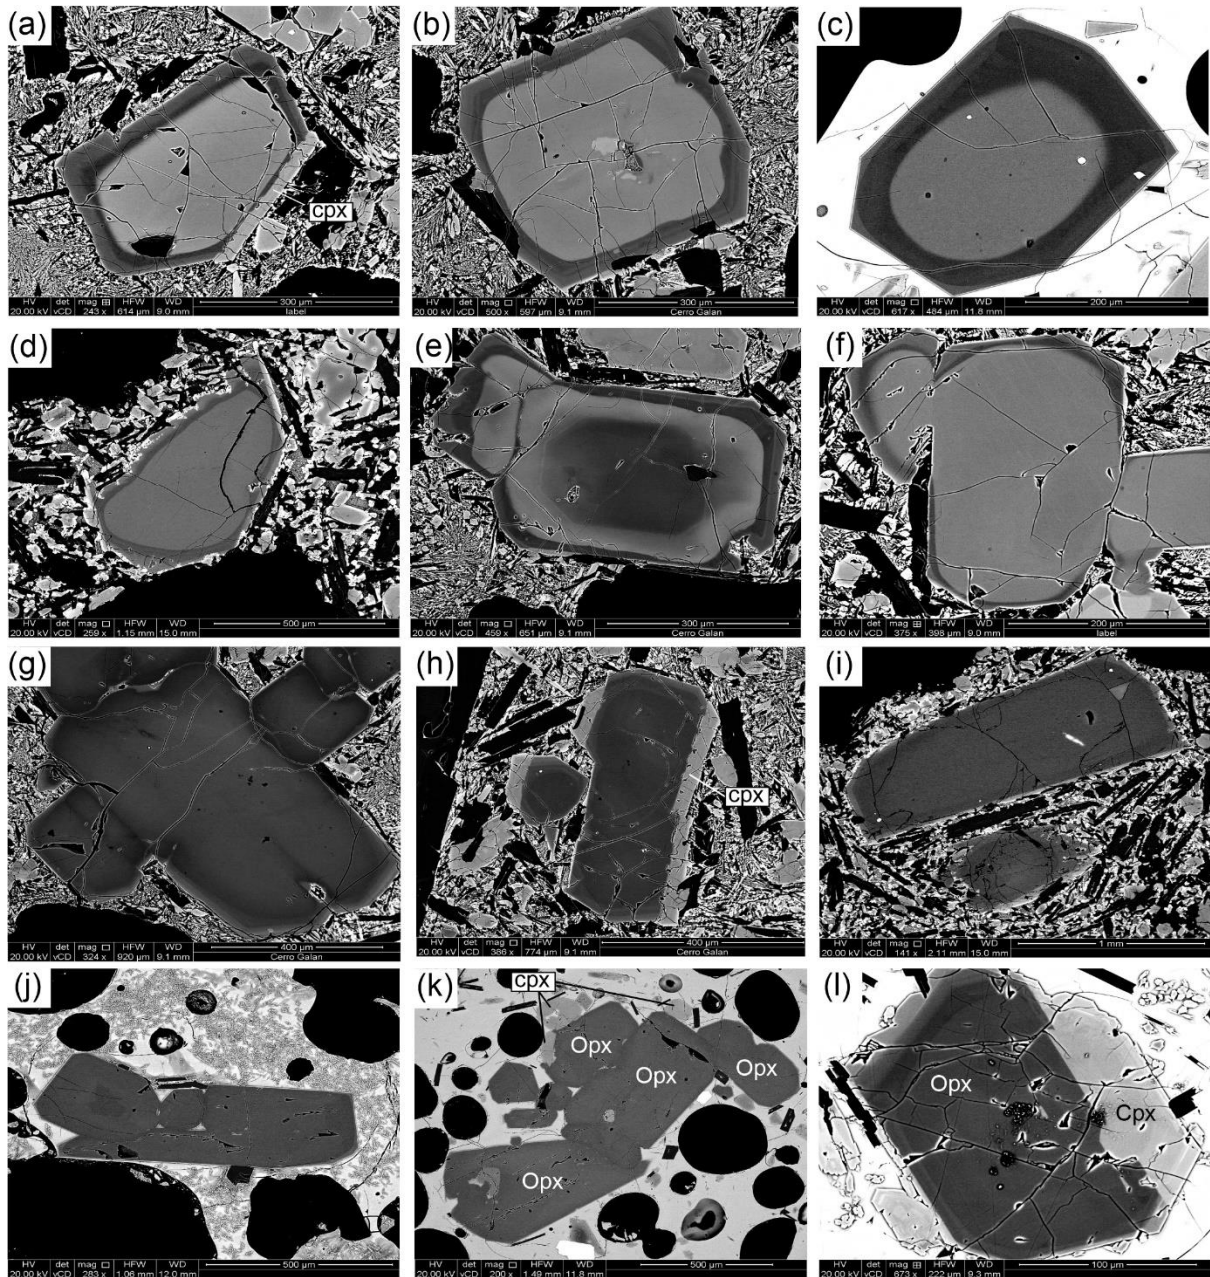

**Supplementary Figure S3. (a-l) Backscatter electron (BSE) images documenting orthopyroxene zoning types and textural features.** (a-f) Reverse and (e) complexly zoned orthopyroxenes containing anhedradal and corroded low Mg-number cores overgrown by Mg-rich, oscillatory and sector zoned mantles, followed by euhedral to subhedral, low Mg-number rims. (e) Complexly zoned orthopyroxene with an anhedradal and resorbed high-Mg-number core, followed by a low-Mg-number mantle zone and increasing Mg contents towards the rim. (g-i) Normally zoned orthopyroxene macrocrystals with Mg-rich cores and decreasing contents towards the outermost rims. (g) Monomineralic cluster of large, Mg-rich orthopyroxene crystals. (h) Crystallographically oriented overgrowth of clinopyroxene on Mg-rich orthopyroxene core. (j) Monomineralic cluster of Mg-rich orthopyroxene. (k) Glomerophytic cluster of Mg-rich orthopyroxene and clinopyroxene. (l) Crystallographically oriented intergrowth of ortho- and clinopyroxene. Note the oscillatory zoning. Opx: Orthopyroxene; Cpx: Clinopyroxene.

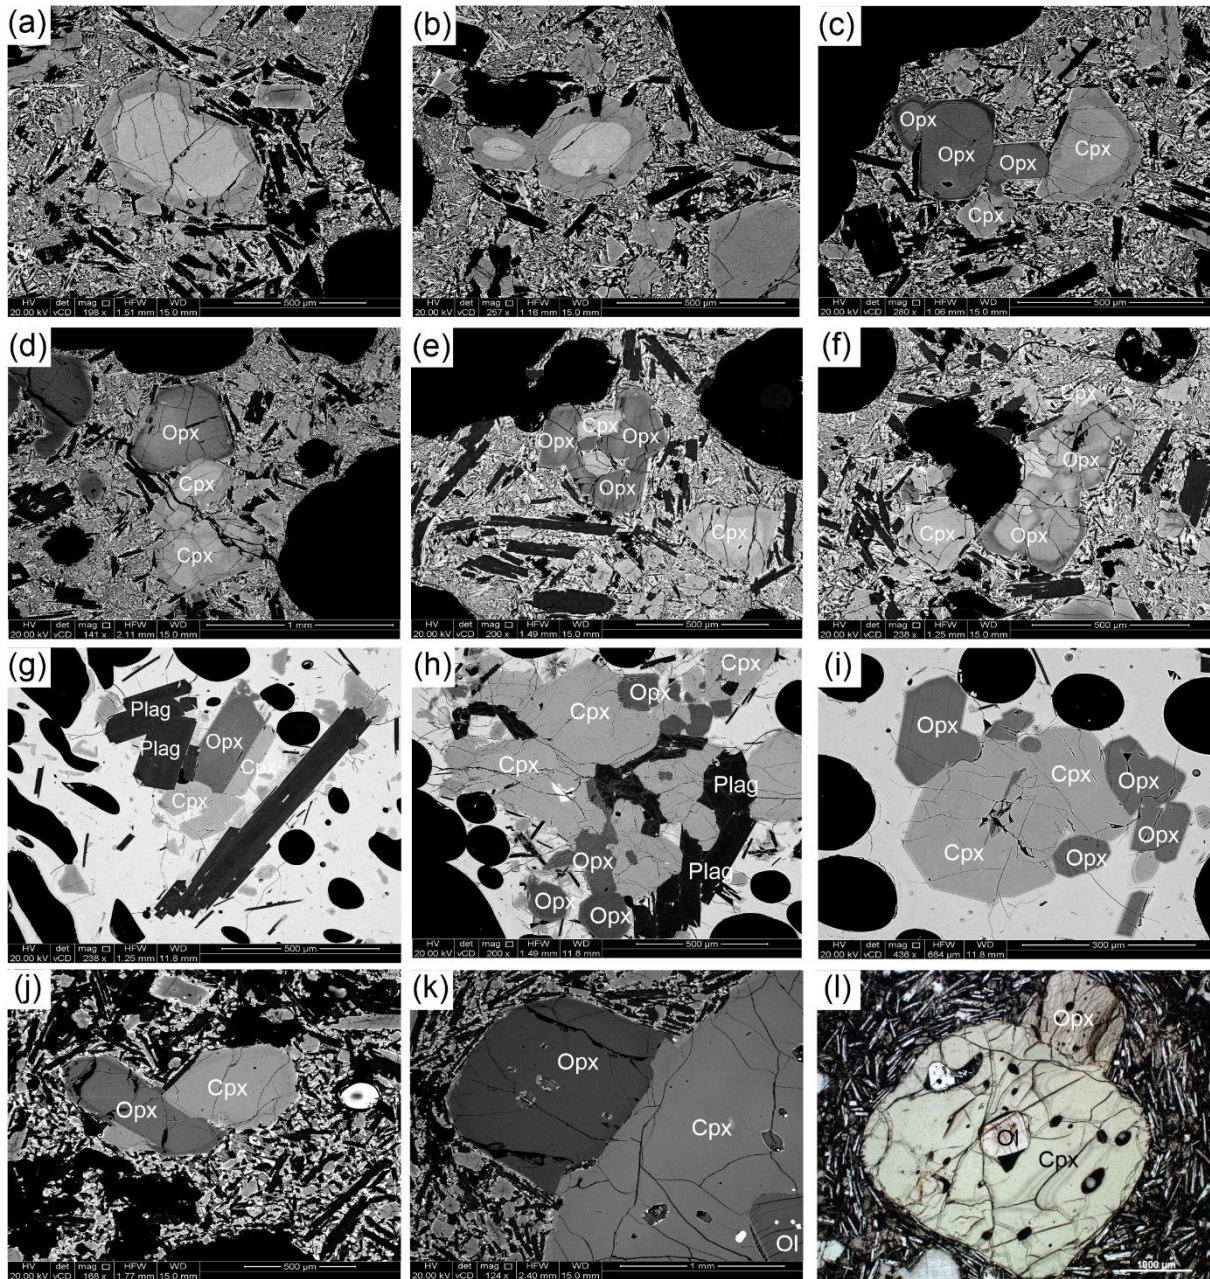

**Supplementary Figure S4. (a-k) Backscatter electron (BSE) images and photomicrograph (l) documenting clinopyroxene zoning types and textural features.** (a-f) Complex reversely zoned clinopyroxene crystals containing anhedral and corroded low Mg-number cores overgrown by Mg-rich, oscillatory and sector zoned mantles/ rims. Anhedral rims incorporating plagioclase microlites from the surrounding groundmass. (c-f) Glomerophytic clusters of reversely zoned clinopyroxenes and orthopyroxenes. (g-h) Gabbronoritic clots of orthopyroxene, clinopyroxene and plagioclase with interstitial glass (h). (i-k) Cluster of orthopyroxenes and clinopyroxenes. (j) Intergrowth of reversely zoned clino- and orthopyroxene. (k) Mg-rich orthopyroxene intergrown with megacrystic clinopyroxene. (l) Photomicrograph of (k) showing large, poikilitic clinopyroxene enclosing olivine. Opx: Orthopyroxene; Cpx: Clinopyroxene; Plag: Plagioclase; Ol: Olivine.



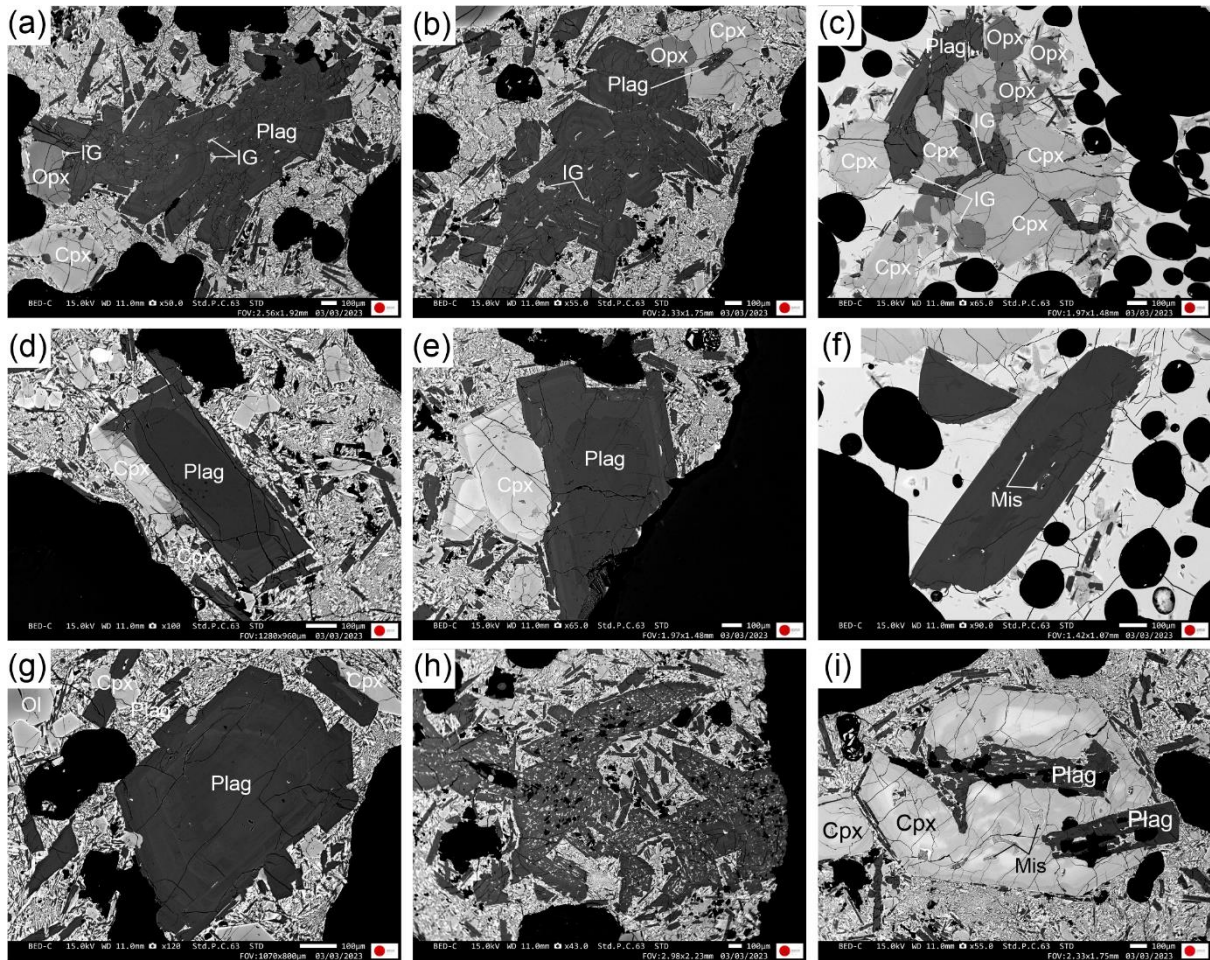

**Supplementary Figure S5. (a-i) Backscatter electron (BSE) images documenting plagioclase zoning and textural features.** (a-c) Gabbronoritic clusters of oscillatory zoned plagioclase, clinopyroxene and orthopyroxene. (d-e) Intergrowth of reversely zoned plagioclase and clinopyroxene. Note corroded plagioclase and clinopyroxene cores. (f-g) Rare plagioclase macrocrysts. (h) Cluster of subhedral plagioclase crystals containing strongly resorbed, spongy cores. (i) Poikilitic, euhedral clinopyroxene macrocryst enclosing strongly resorbed plagioclase crystals displaying sieve textures. Clinopyroxene displays reversely zoned outermost rims and patchy zoning in the centre. Opx: Orthopyroxene; Cpx: Clinopyroxene; Plag: Plagioclase; Ol: Olivine; IG: Interstitial glass; MIs: Melt inclusions.

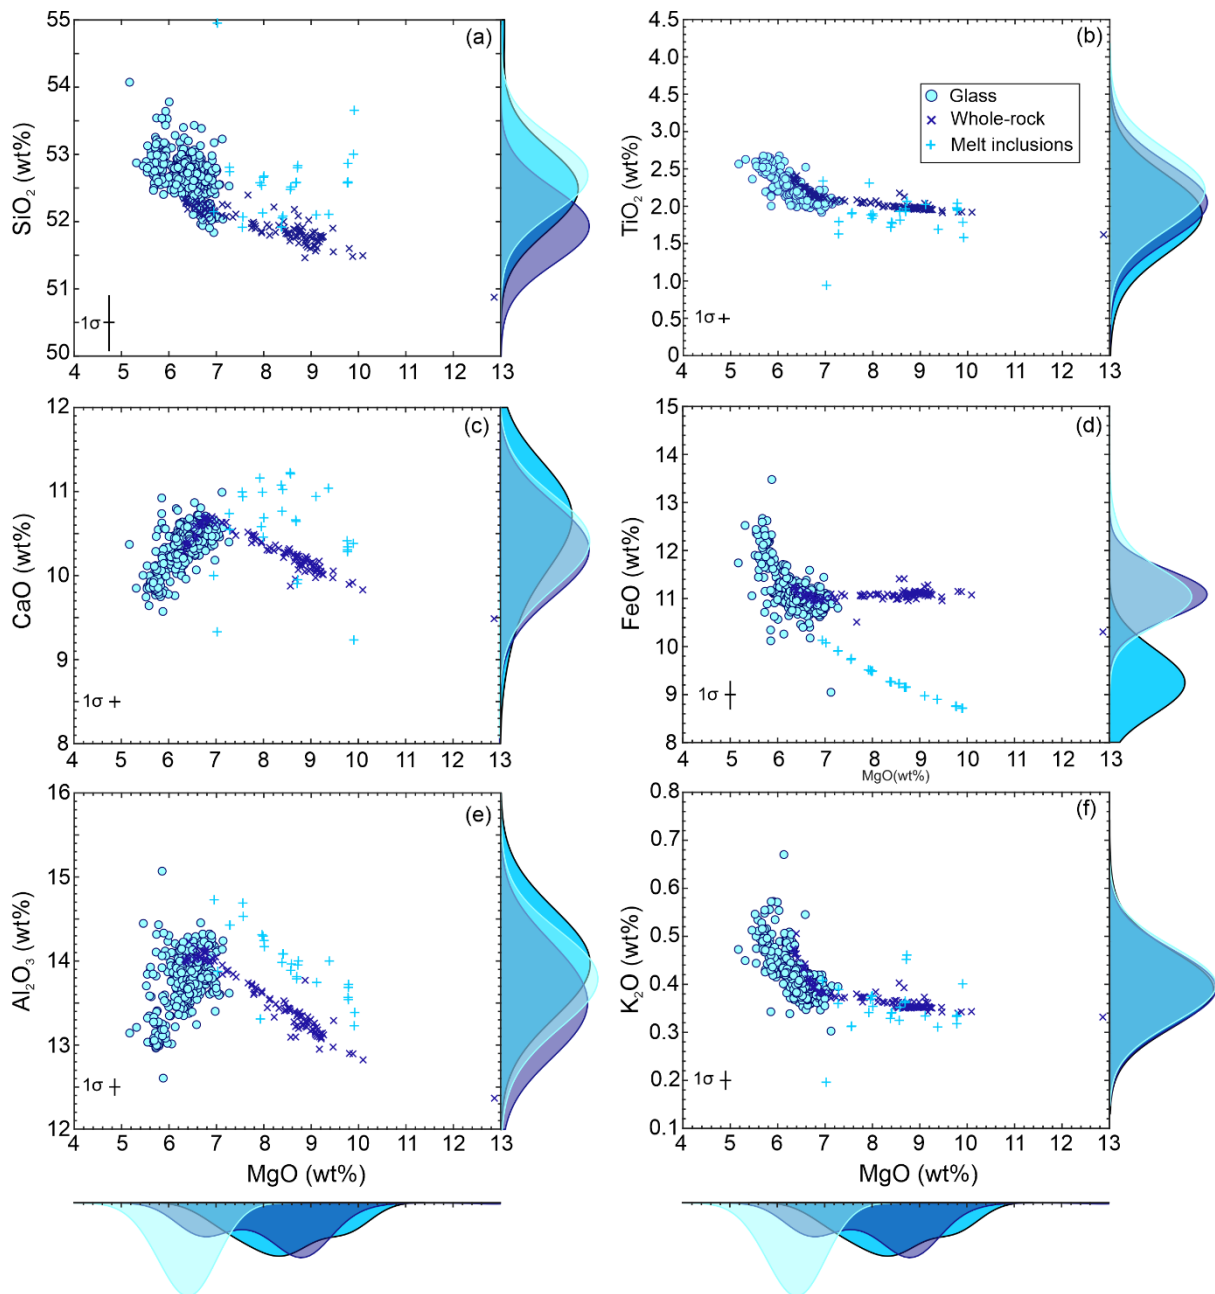

**Supplementary Figure S6. (a-f) Major element versus MgO content plots of groundmass glasses, melt inclusions and whole rocks from the 1950 AD SWRZ eruption.** Melt inclusions have been corrected for post-entrapment crystallization. Filled circles: Groundmass glass compositions; Dark blue crosses: Whole rock compositions; Light blue crosses: PEC-corrected melt inclusion compositions. Error bars:  $1\sigma$ .

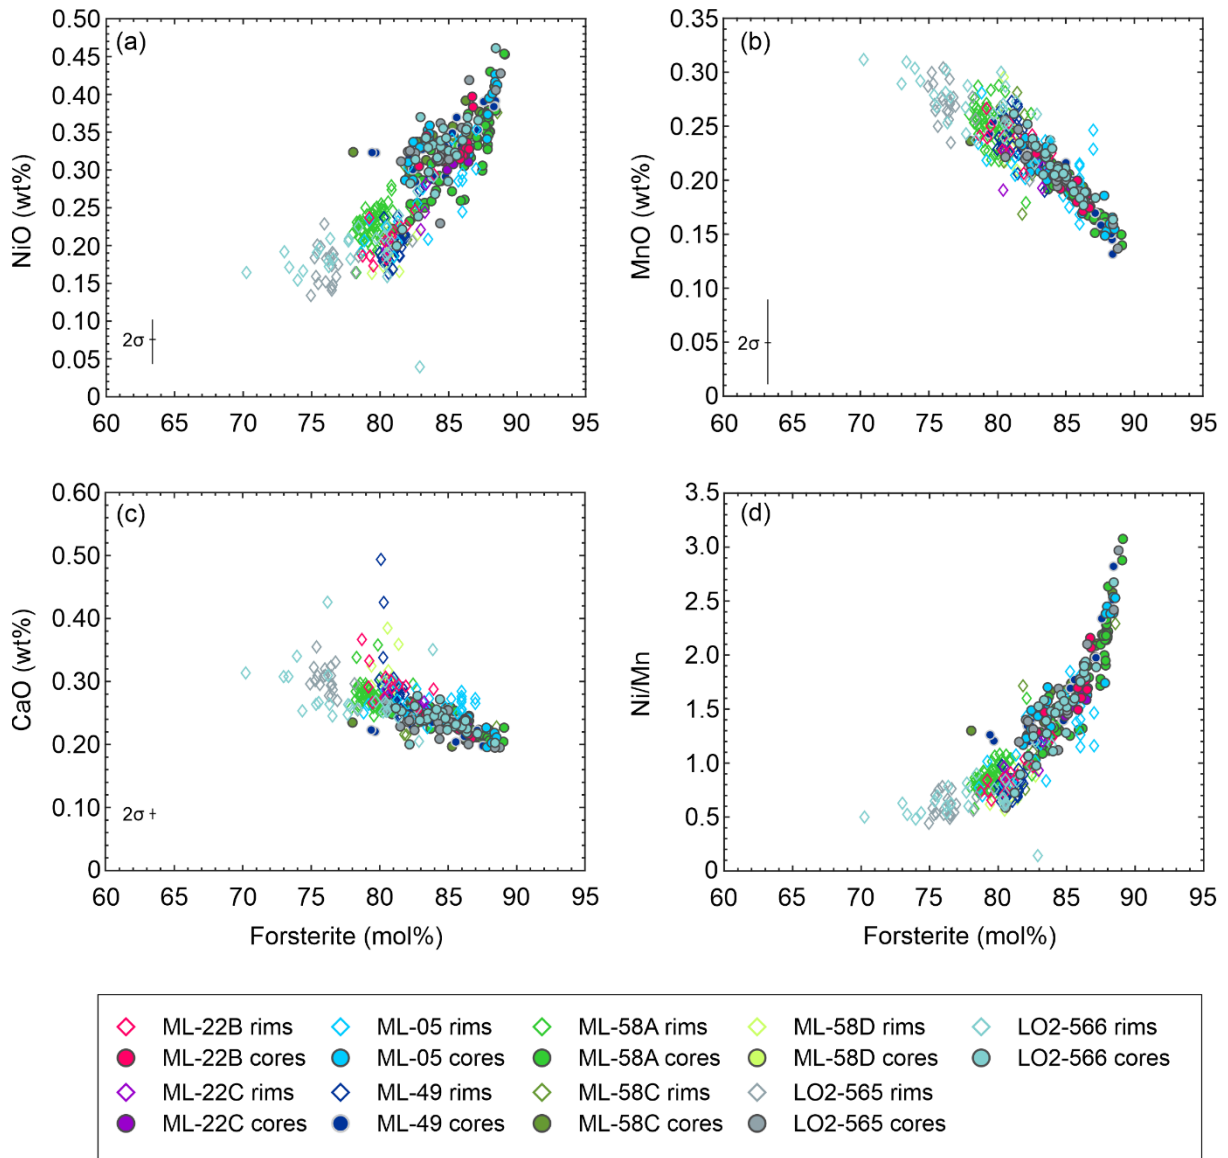

**Supplementary Figure S7.** Plots of minor (MnO, CaO, NiO and Ni/Mn) elements versus forsterite contents of olivine cores (filled circles) and rims (open diamonds). Forsterite =  $100 \times (\text{Mg}/[\text{Mg}+\text{Fe}])$ . Error bars:  $2\sigma$

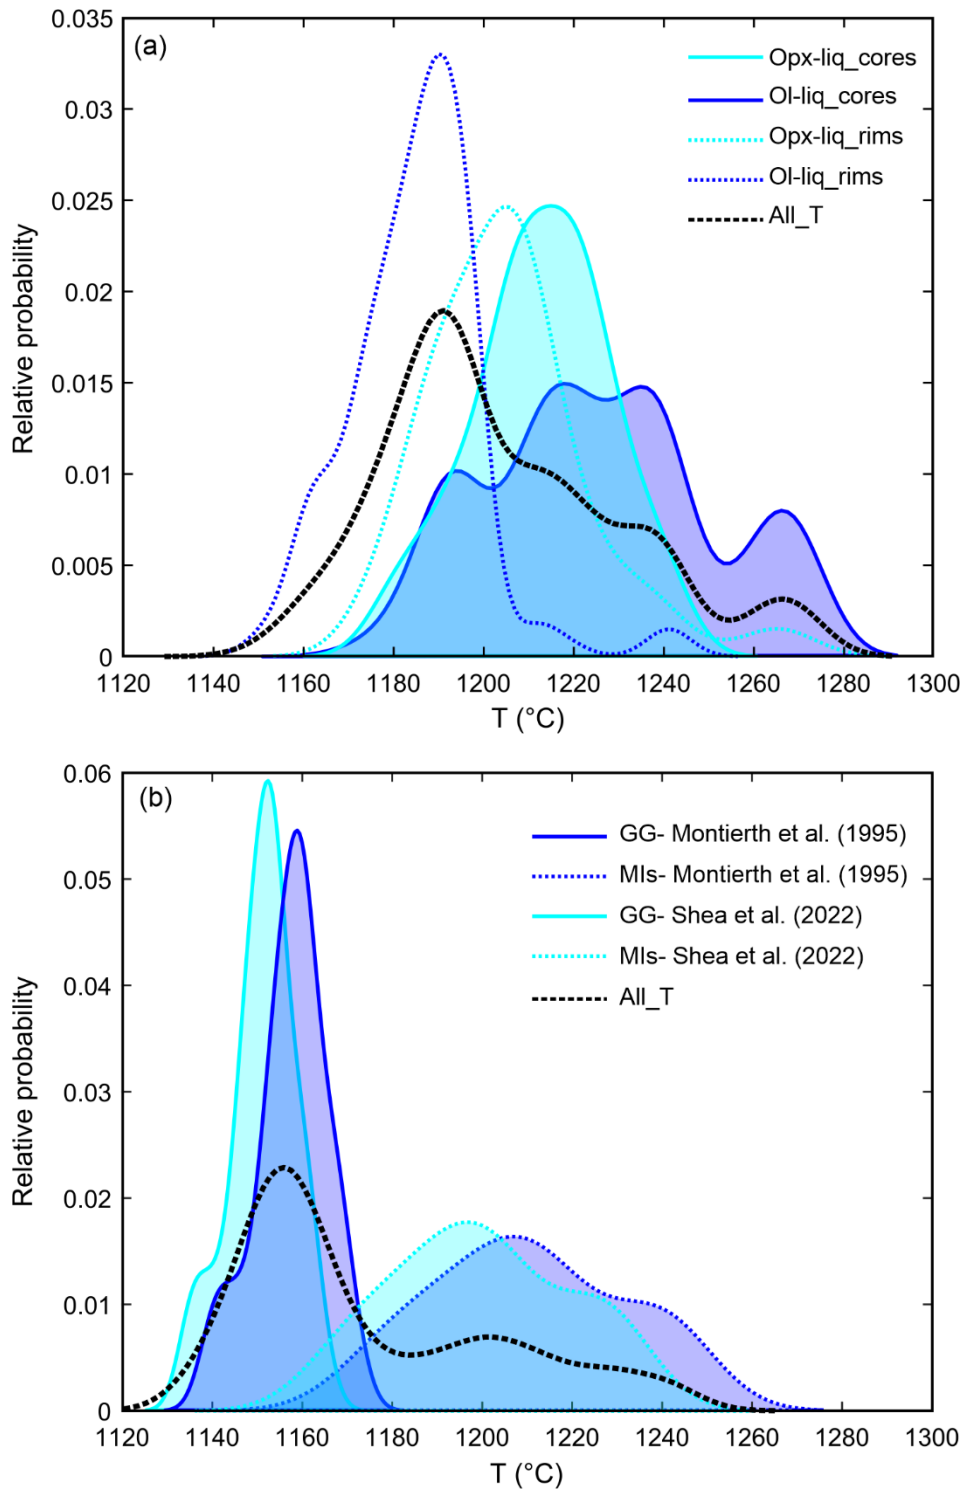

**Supplementary Figure S8. Geothermometry constraints.** (a) Kernel density estimates (KDEs) showing temperature distributions from mineral-melt (olivine-melt and orthopyroxene-melt; Putirka 2008) thermometry for macrocryst cores and rims. (b) KDEs showing temperature distributions from melt-only thermometry (Montierth et al. 1995; Shea et al. 2022). MIs: melt inclusions; GG: groundmass. KDEs were calculated using bandwidths of 3 to 11°C. Black stippled KDEs depict combined temperature distribution results for melt-only and mineral-melt thermometers using bandwidths of 7-9°C.



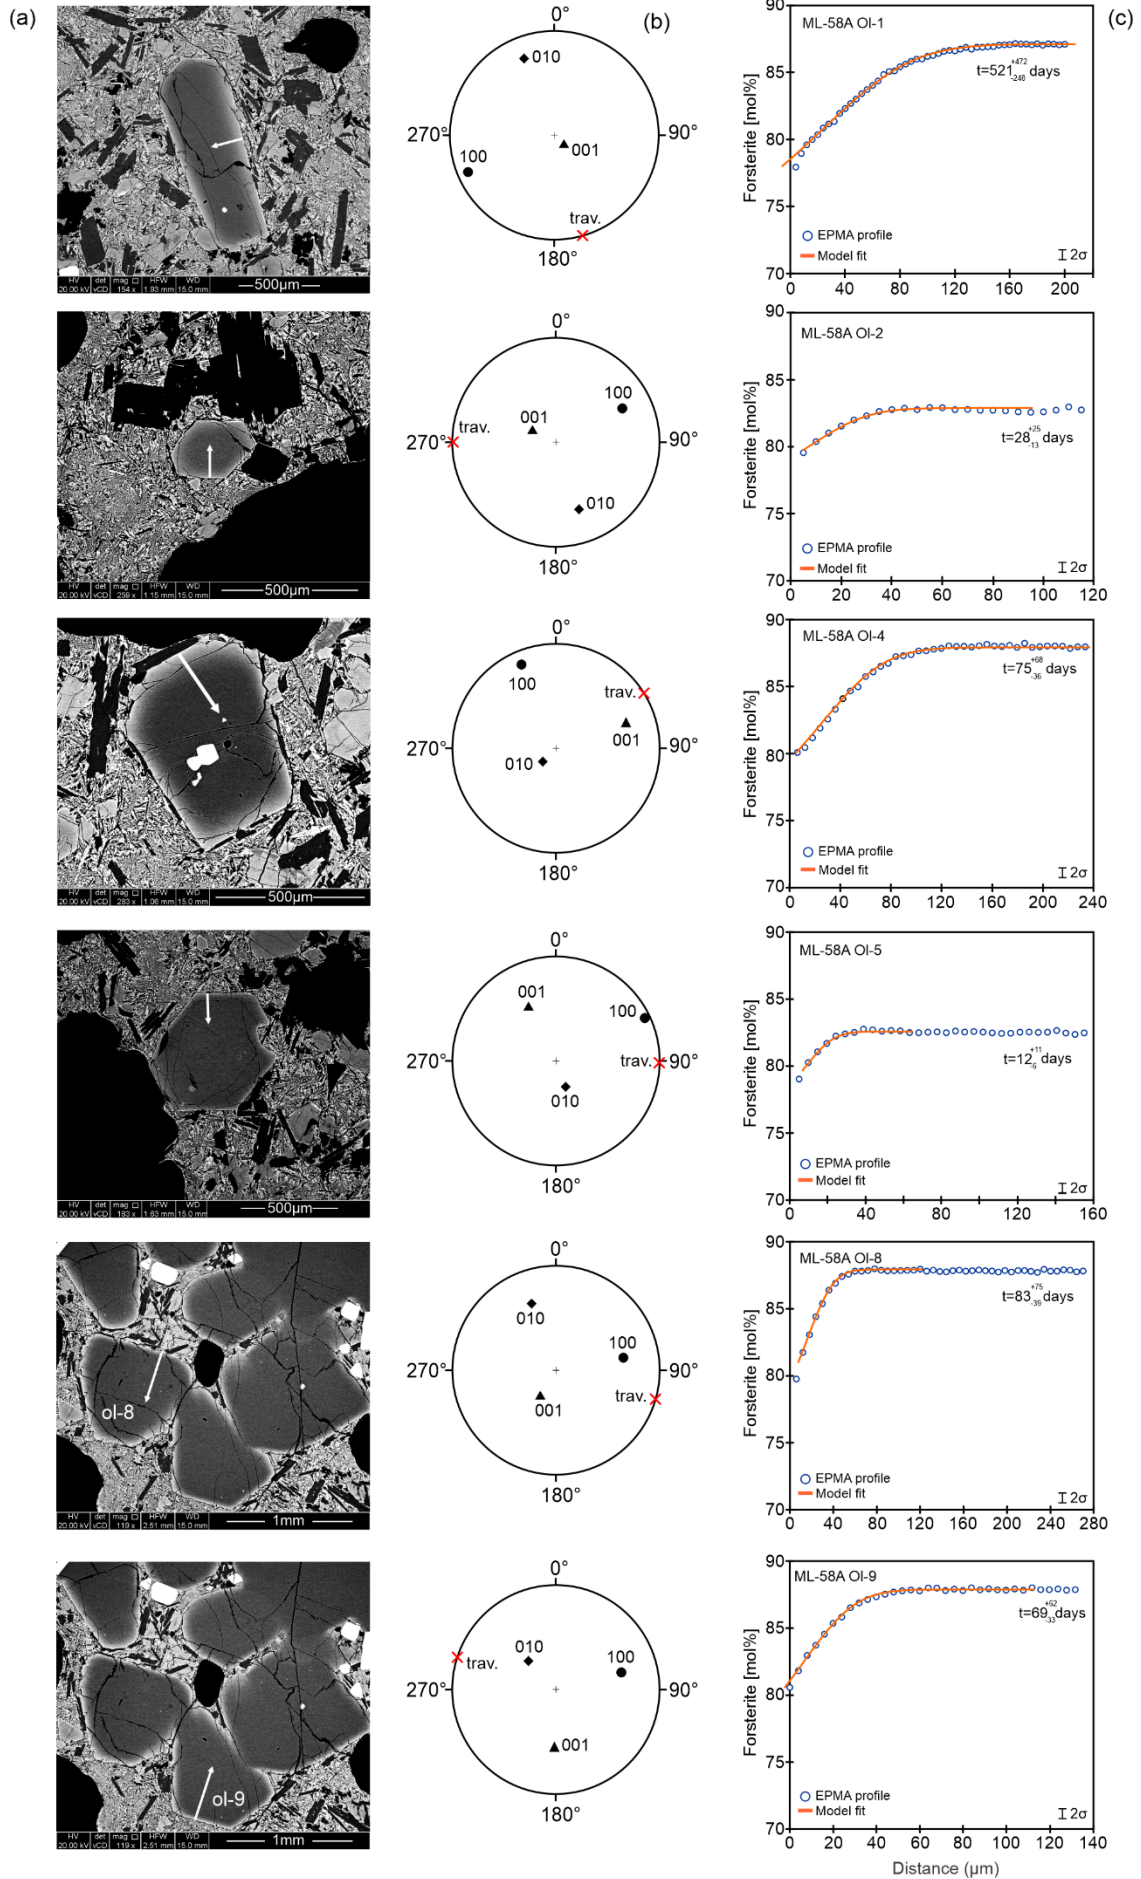

Supplementary Figure S9 - ML-58A

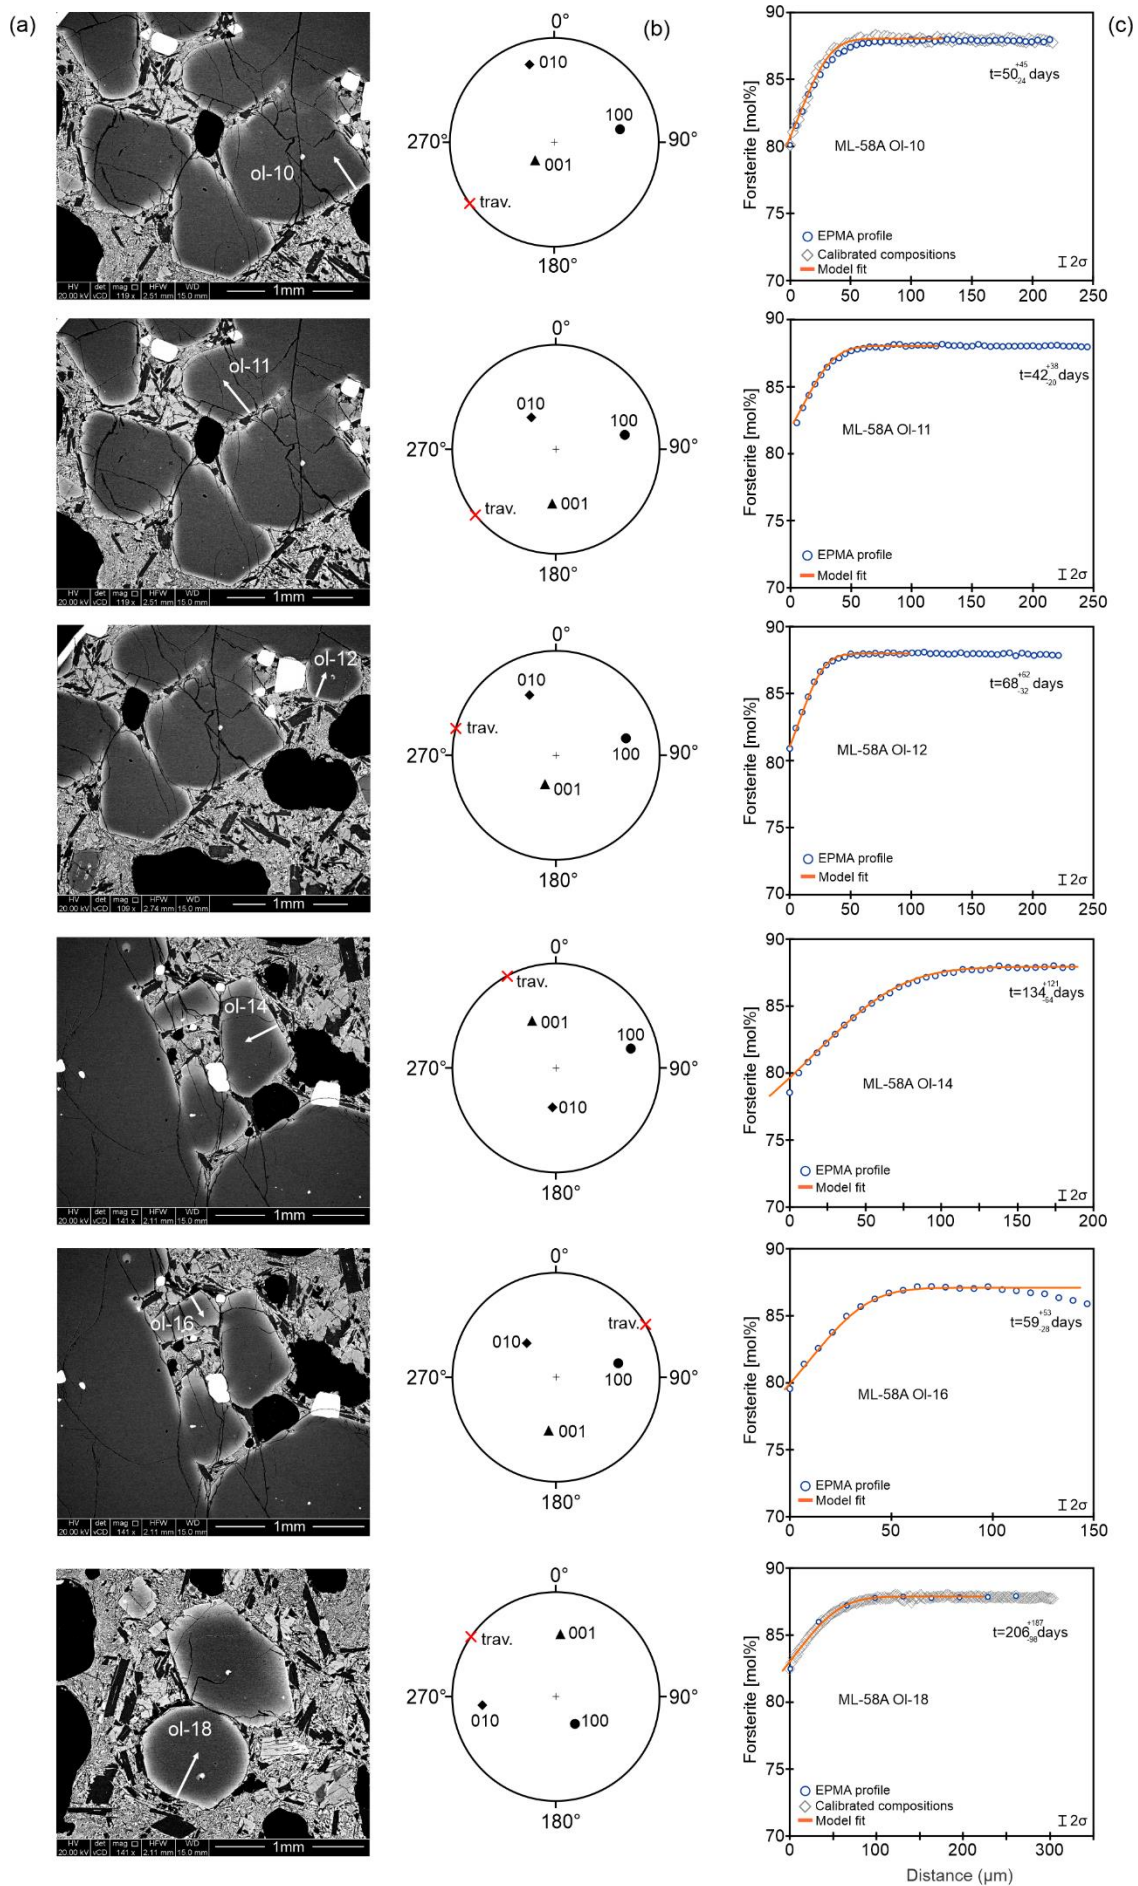

Supplementary Figure S10 - ML-58A



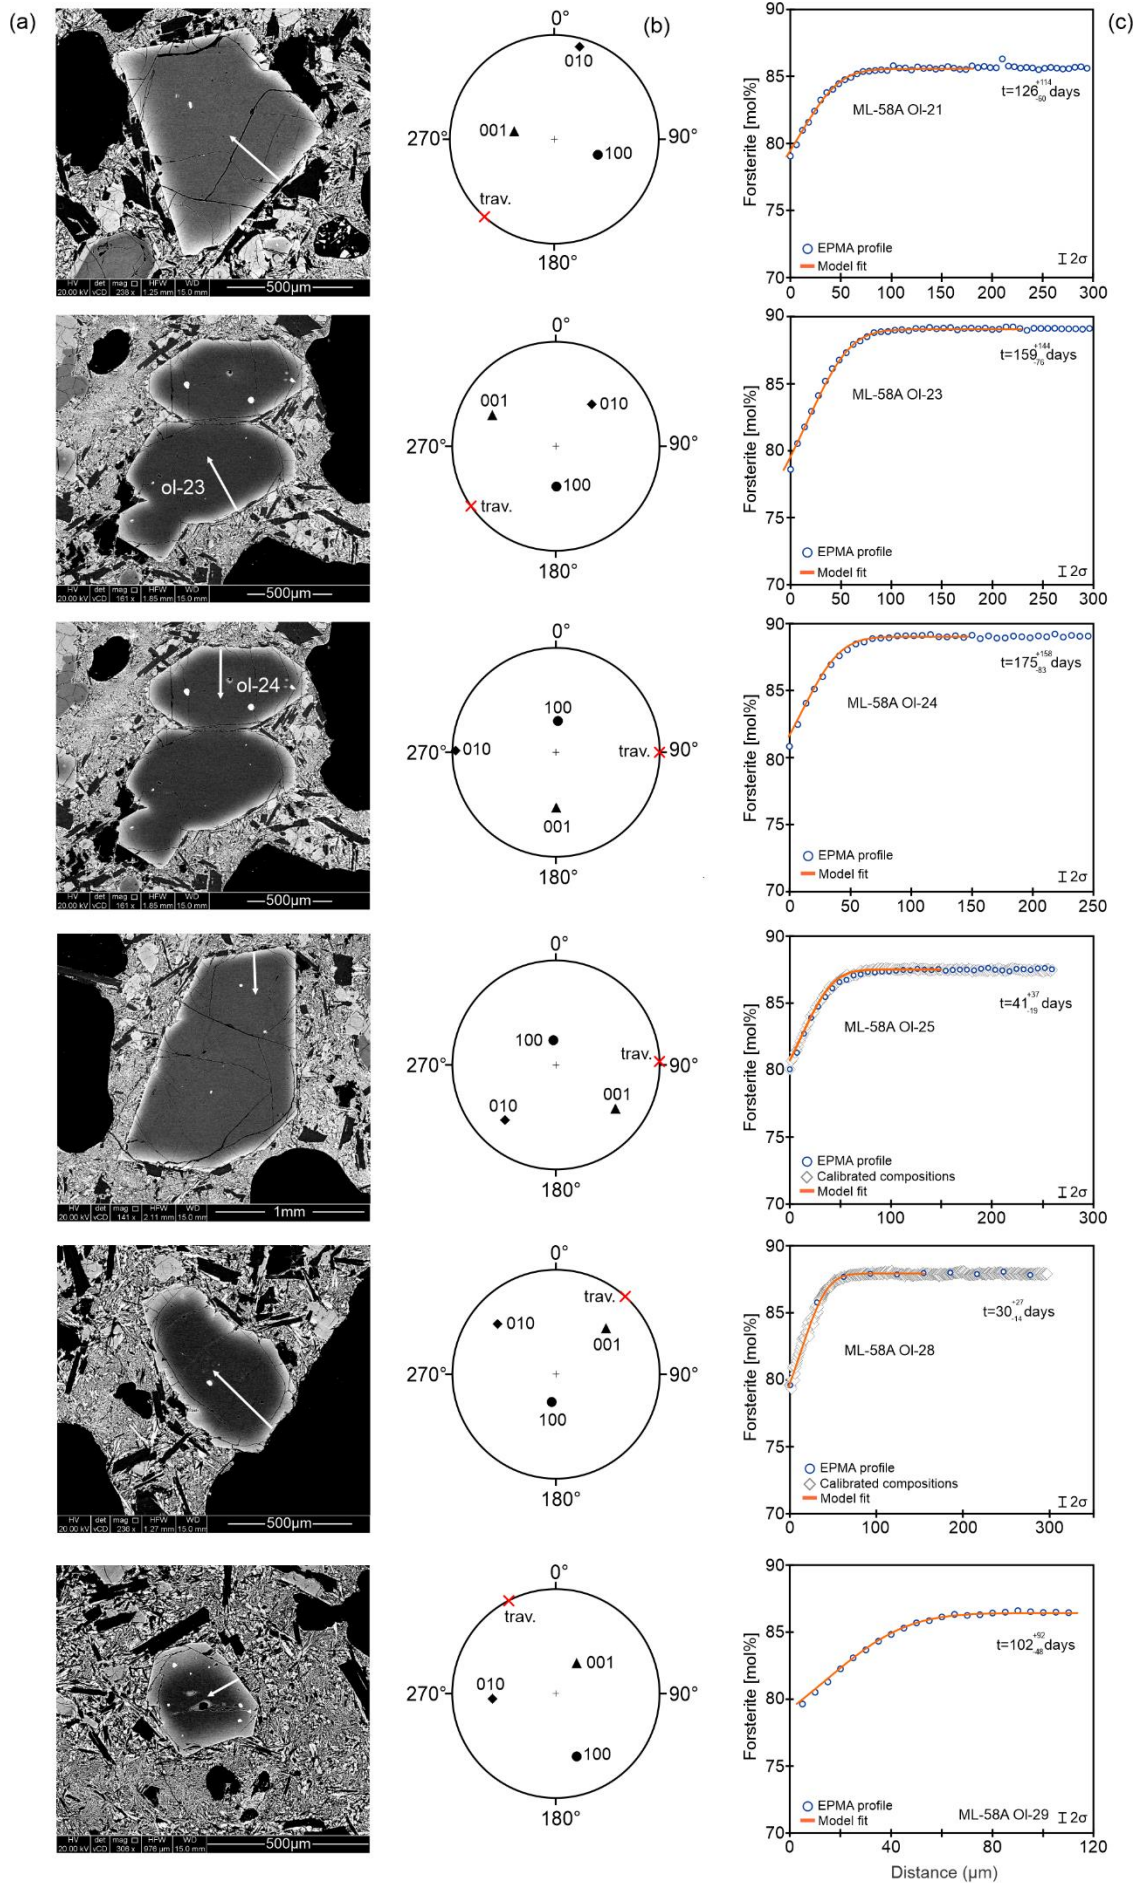

Supplementary Figure S11 - ML-58A

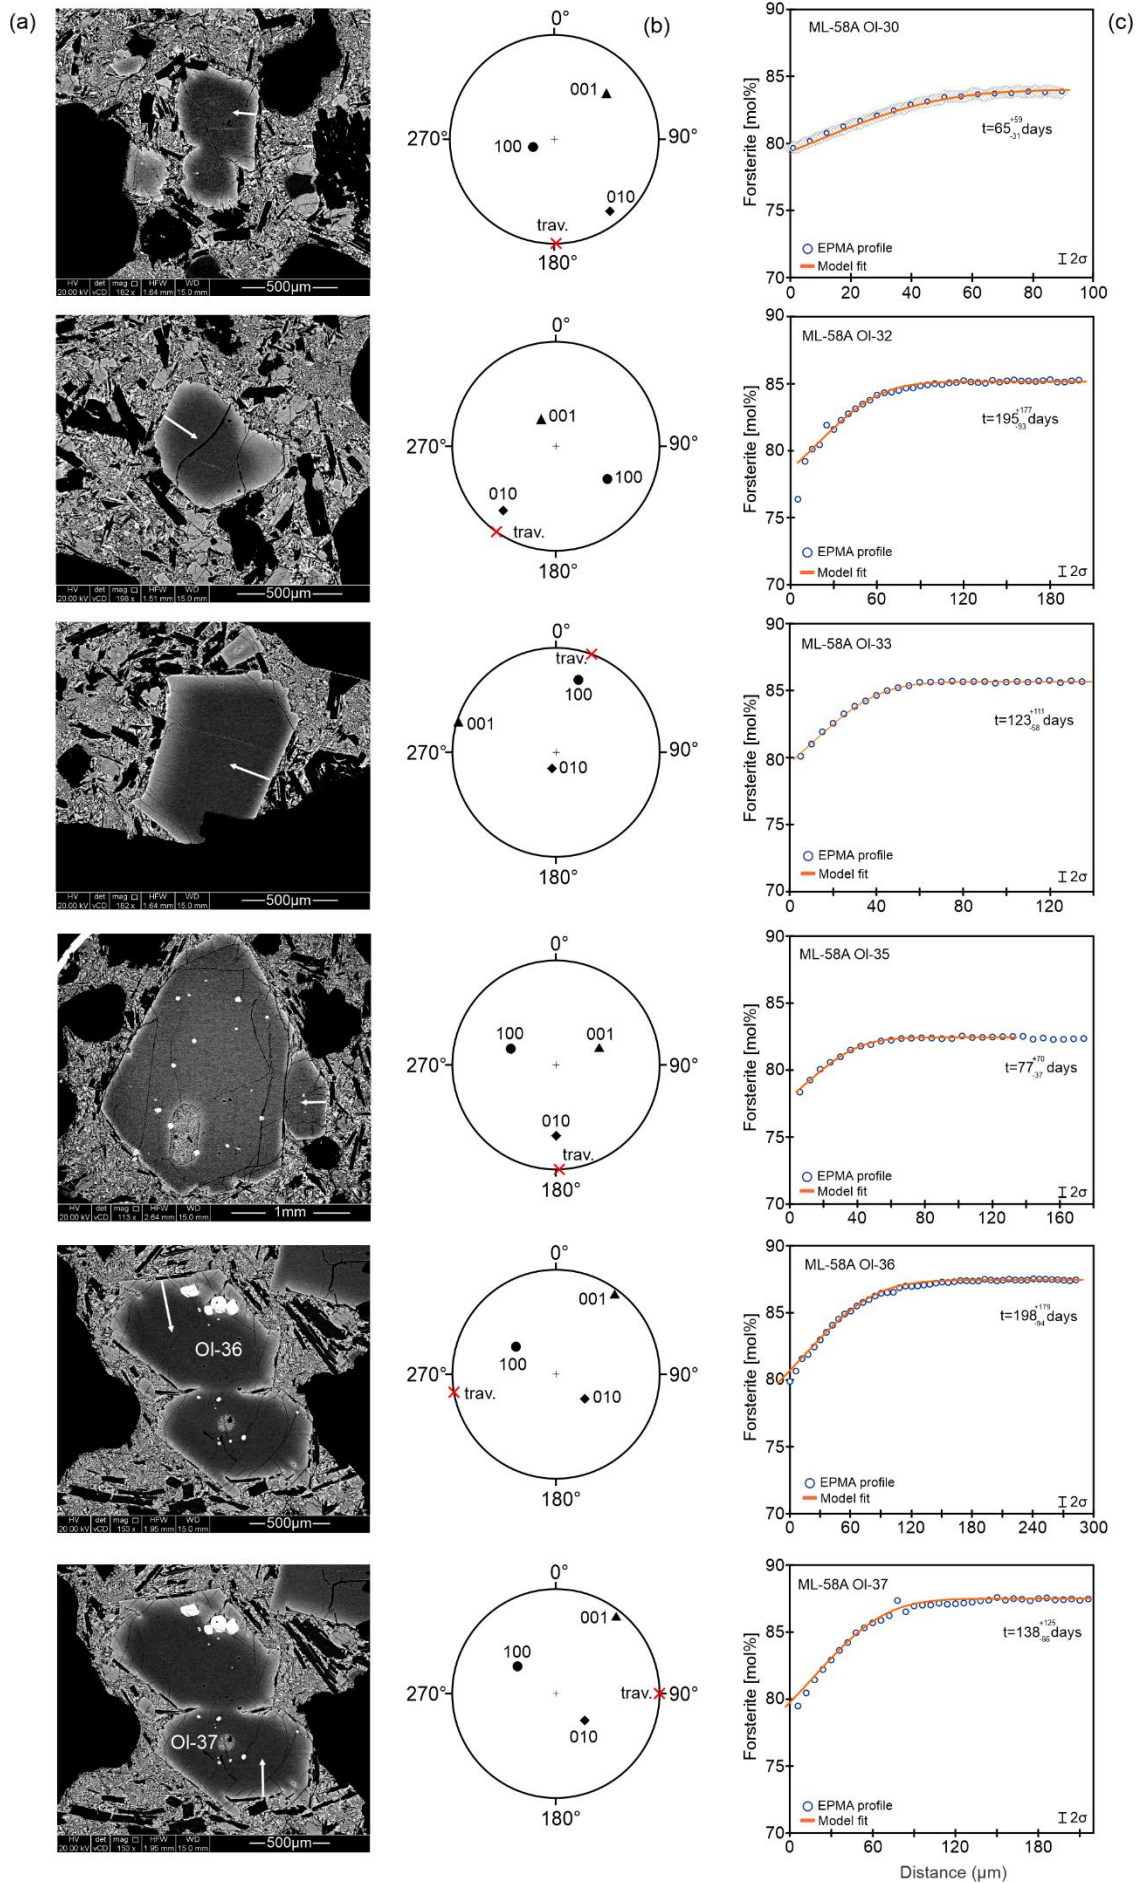

Supplementary Figure S12 - ML-58A



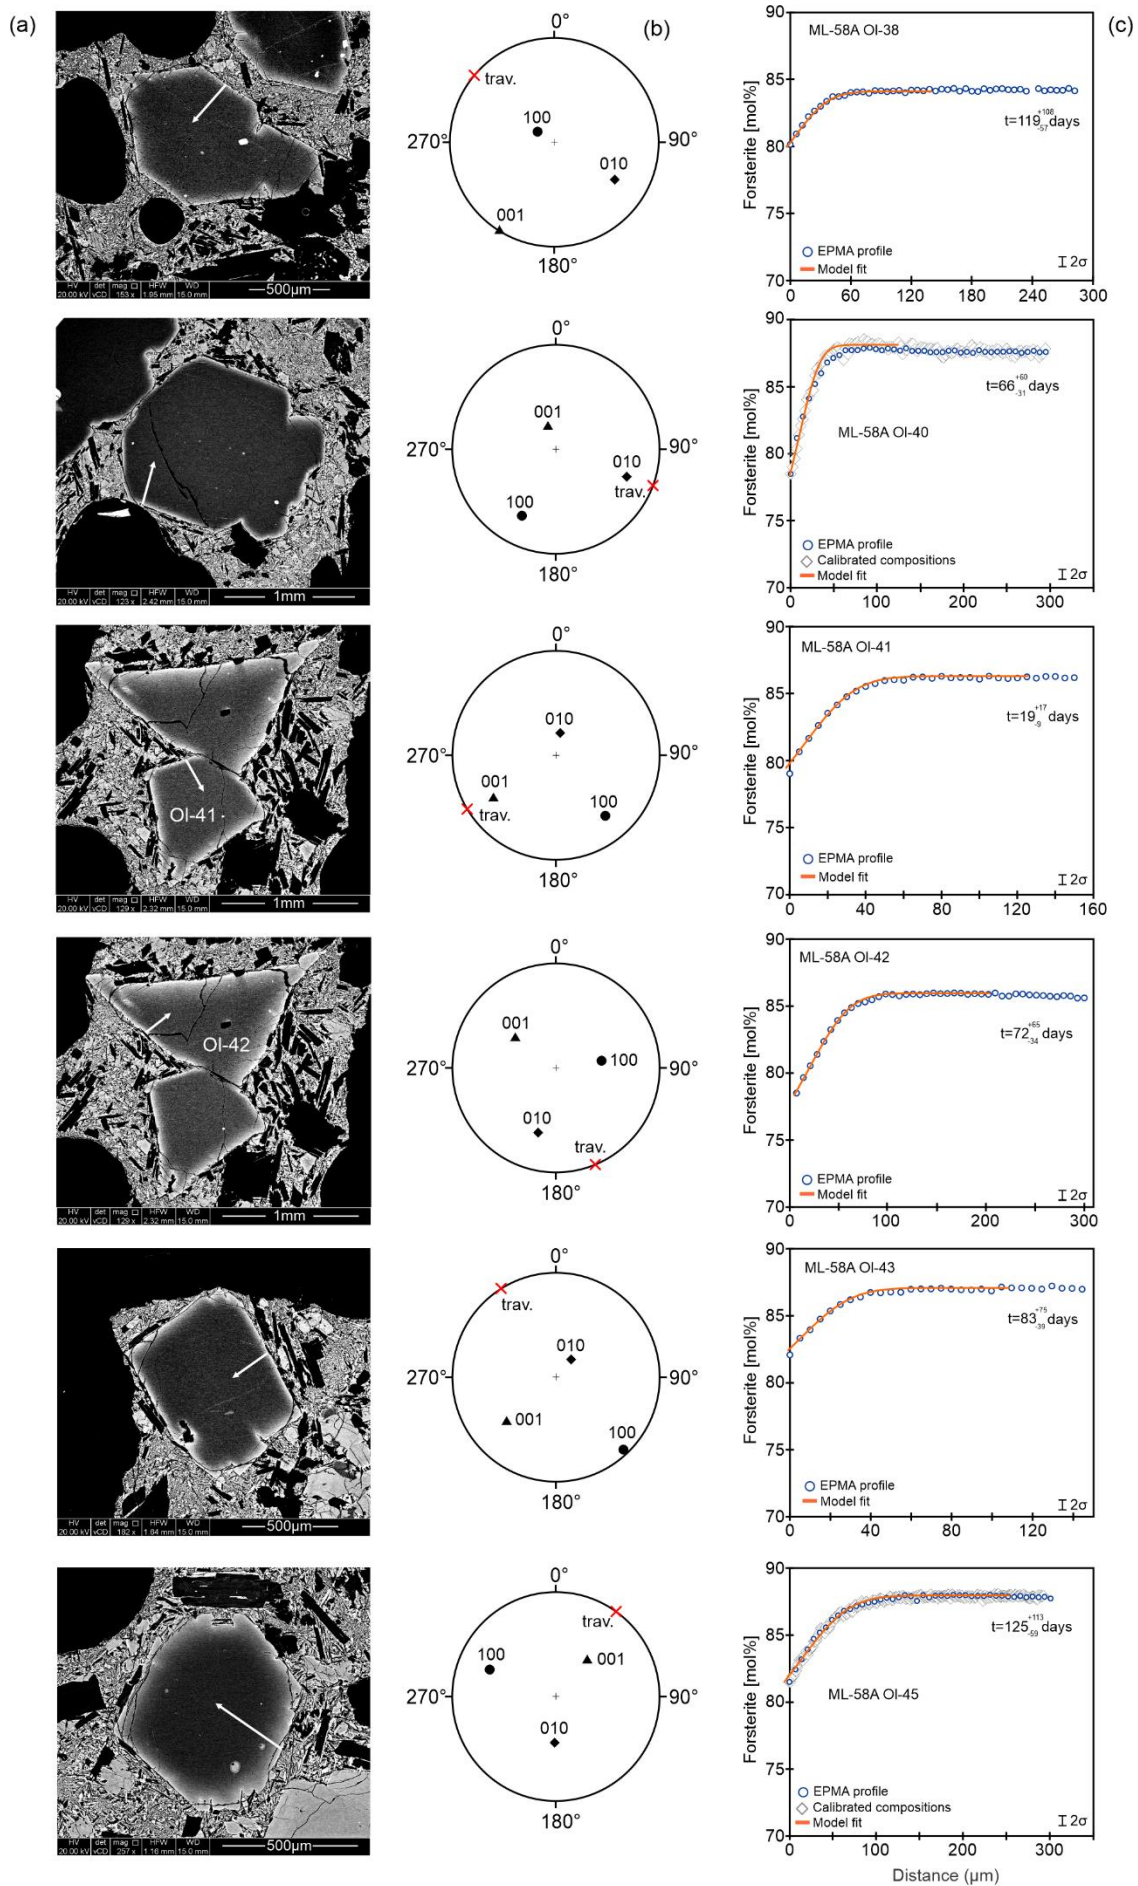

Supplementary Figure S13 - ML-58A

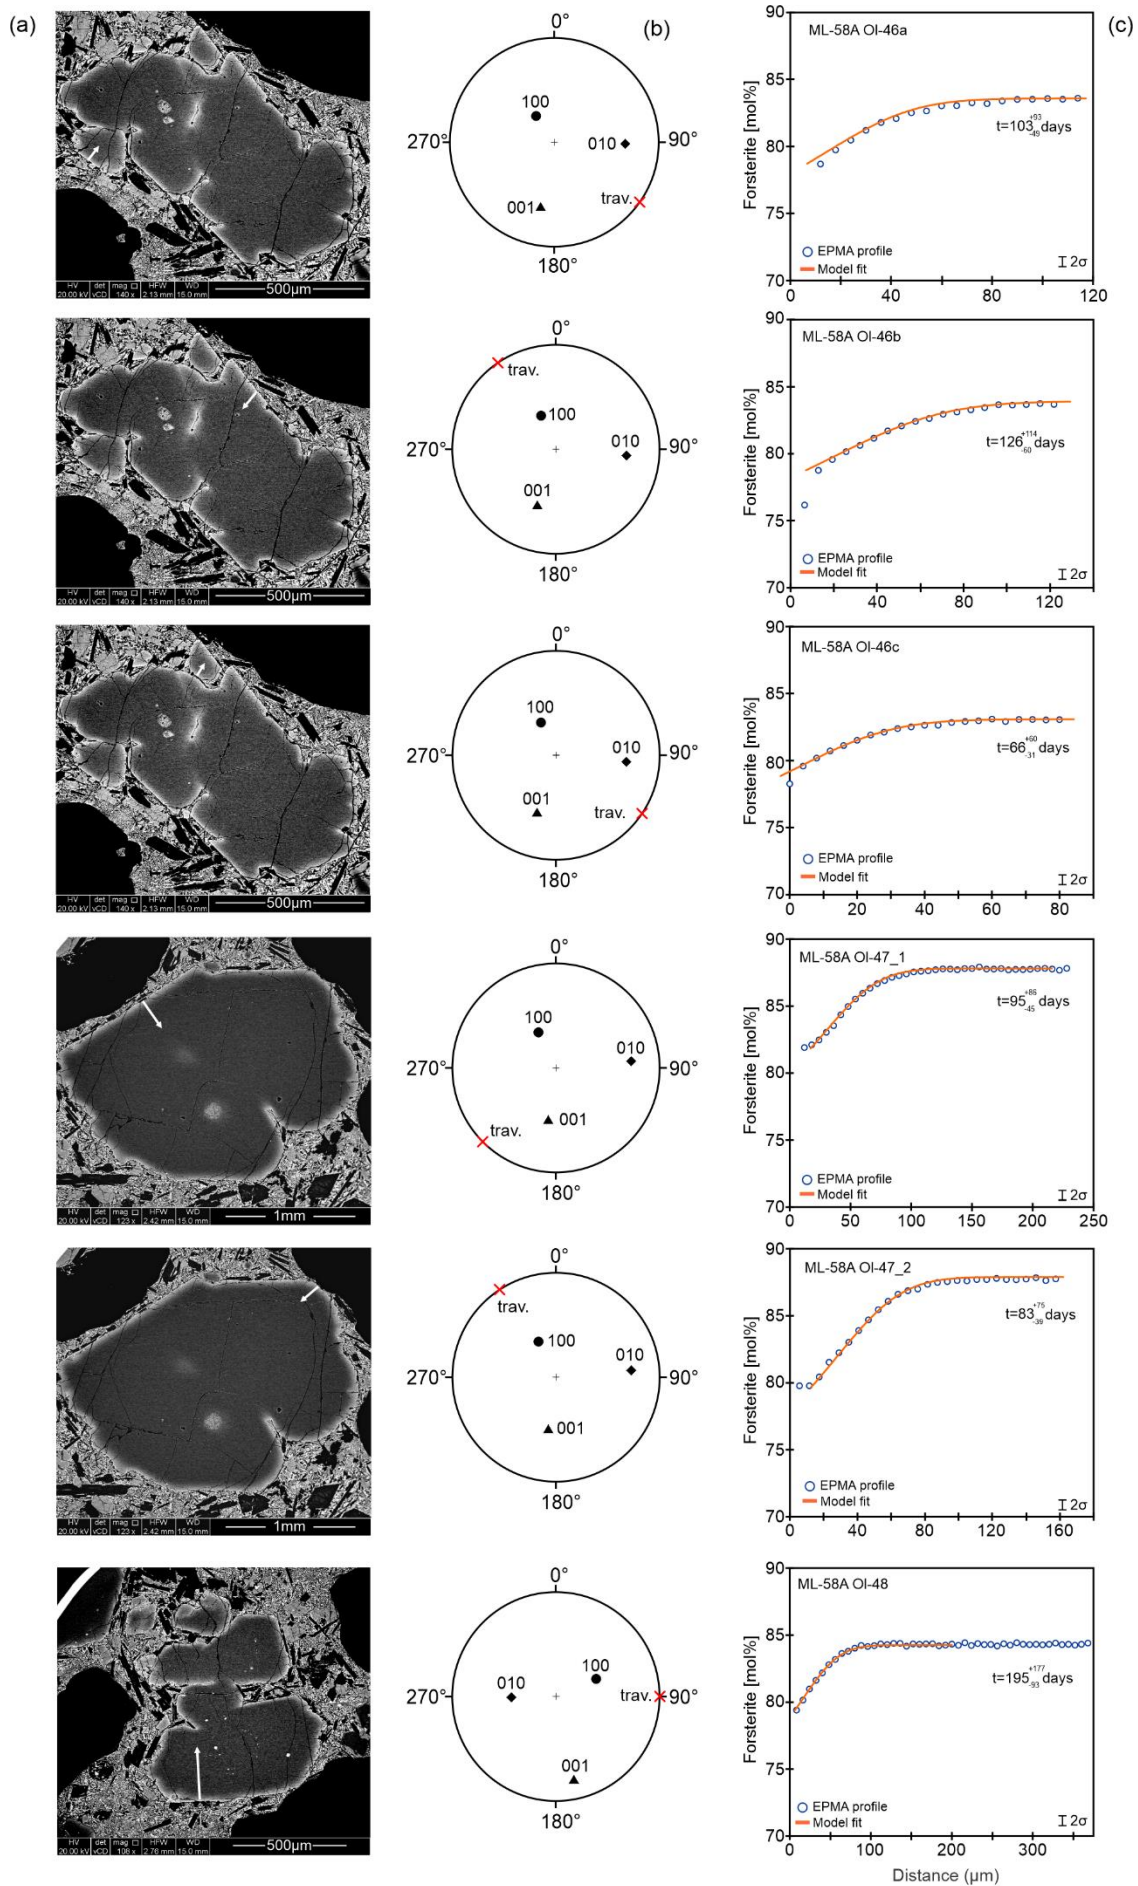

Supplementary Figure S14 - ML-58A



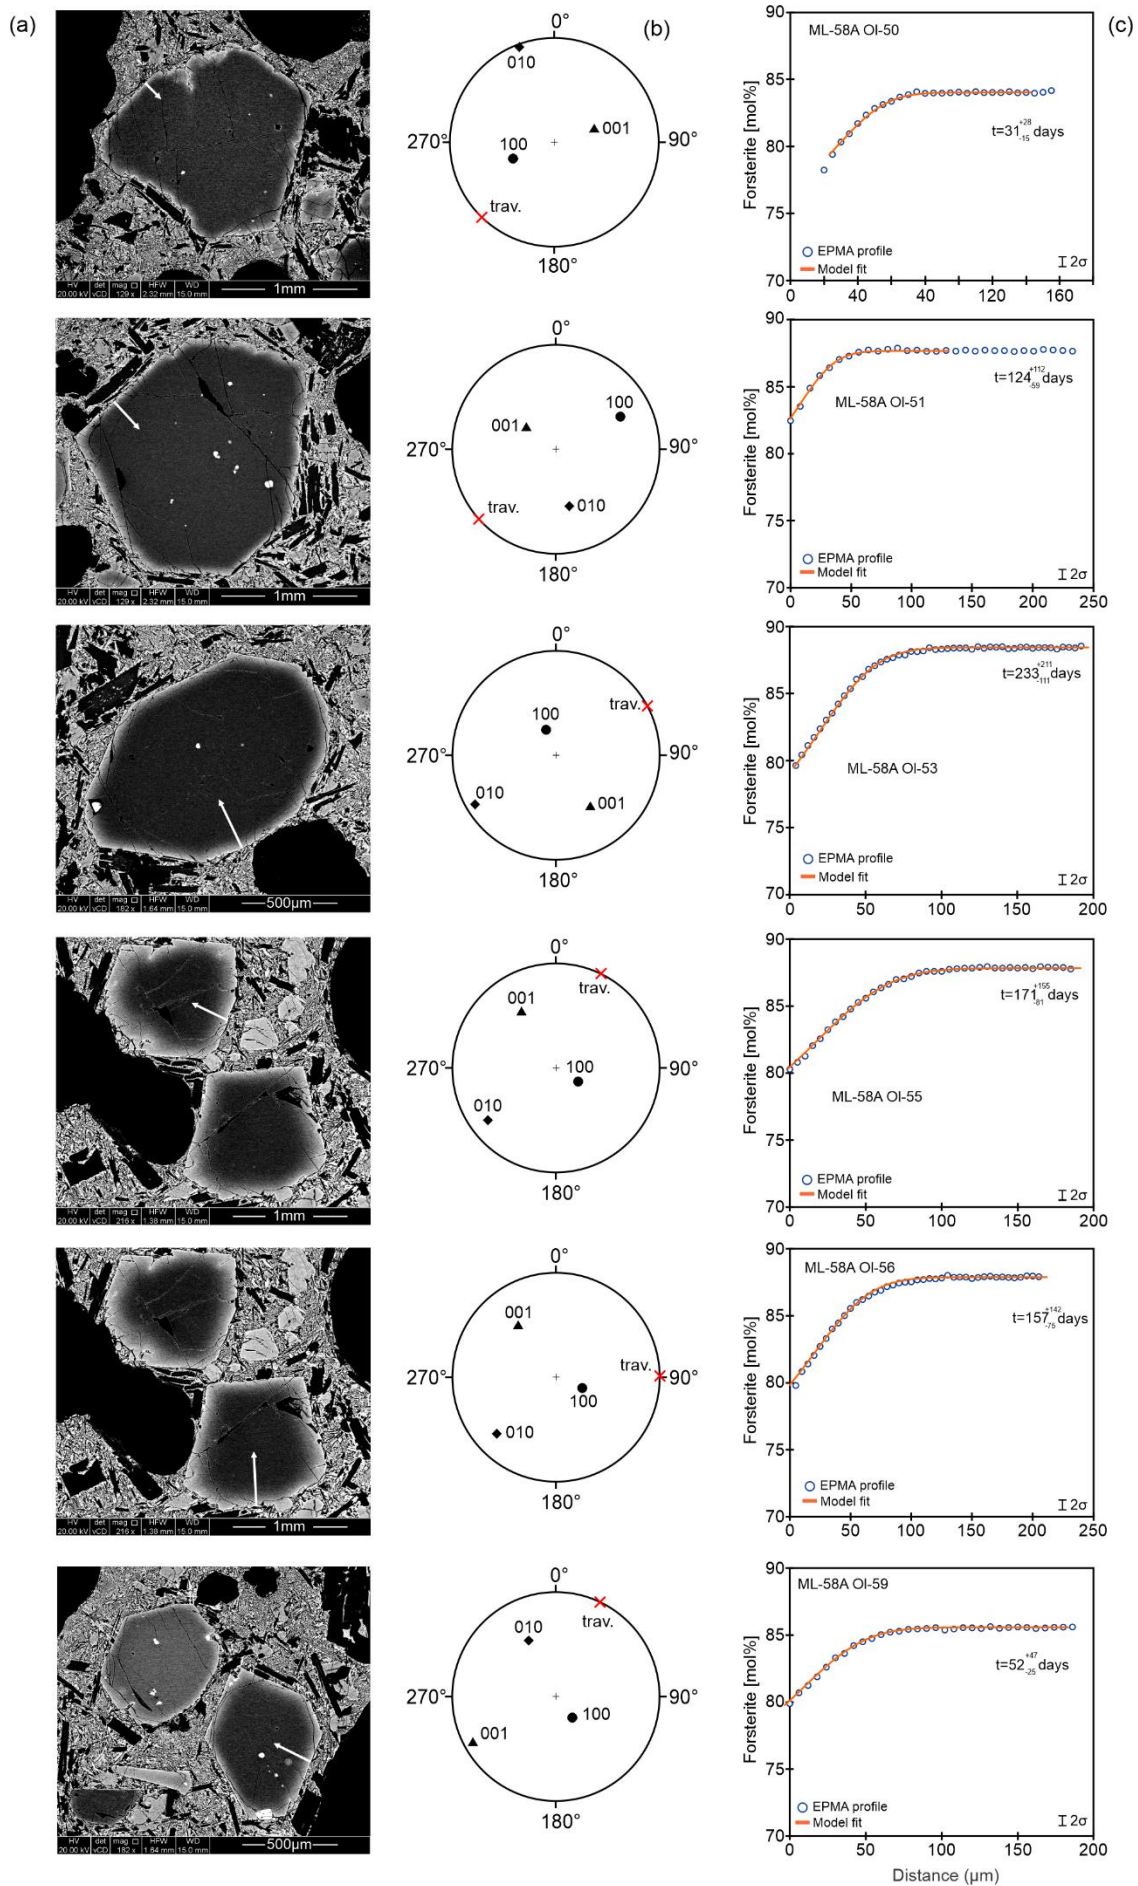

Supplementary Figure S15 - ML-58A

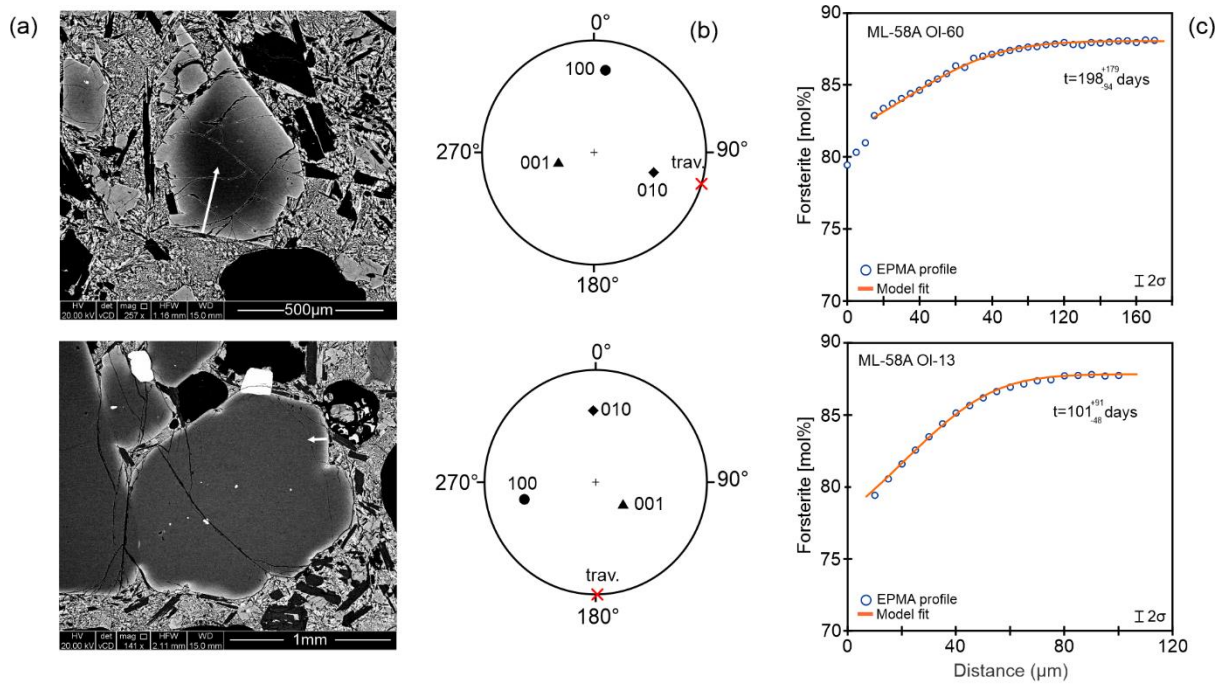

Supplementary Figure S16 - ML-58A



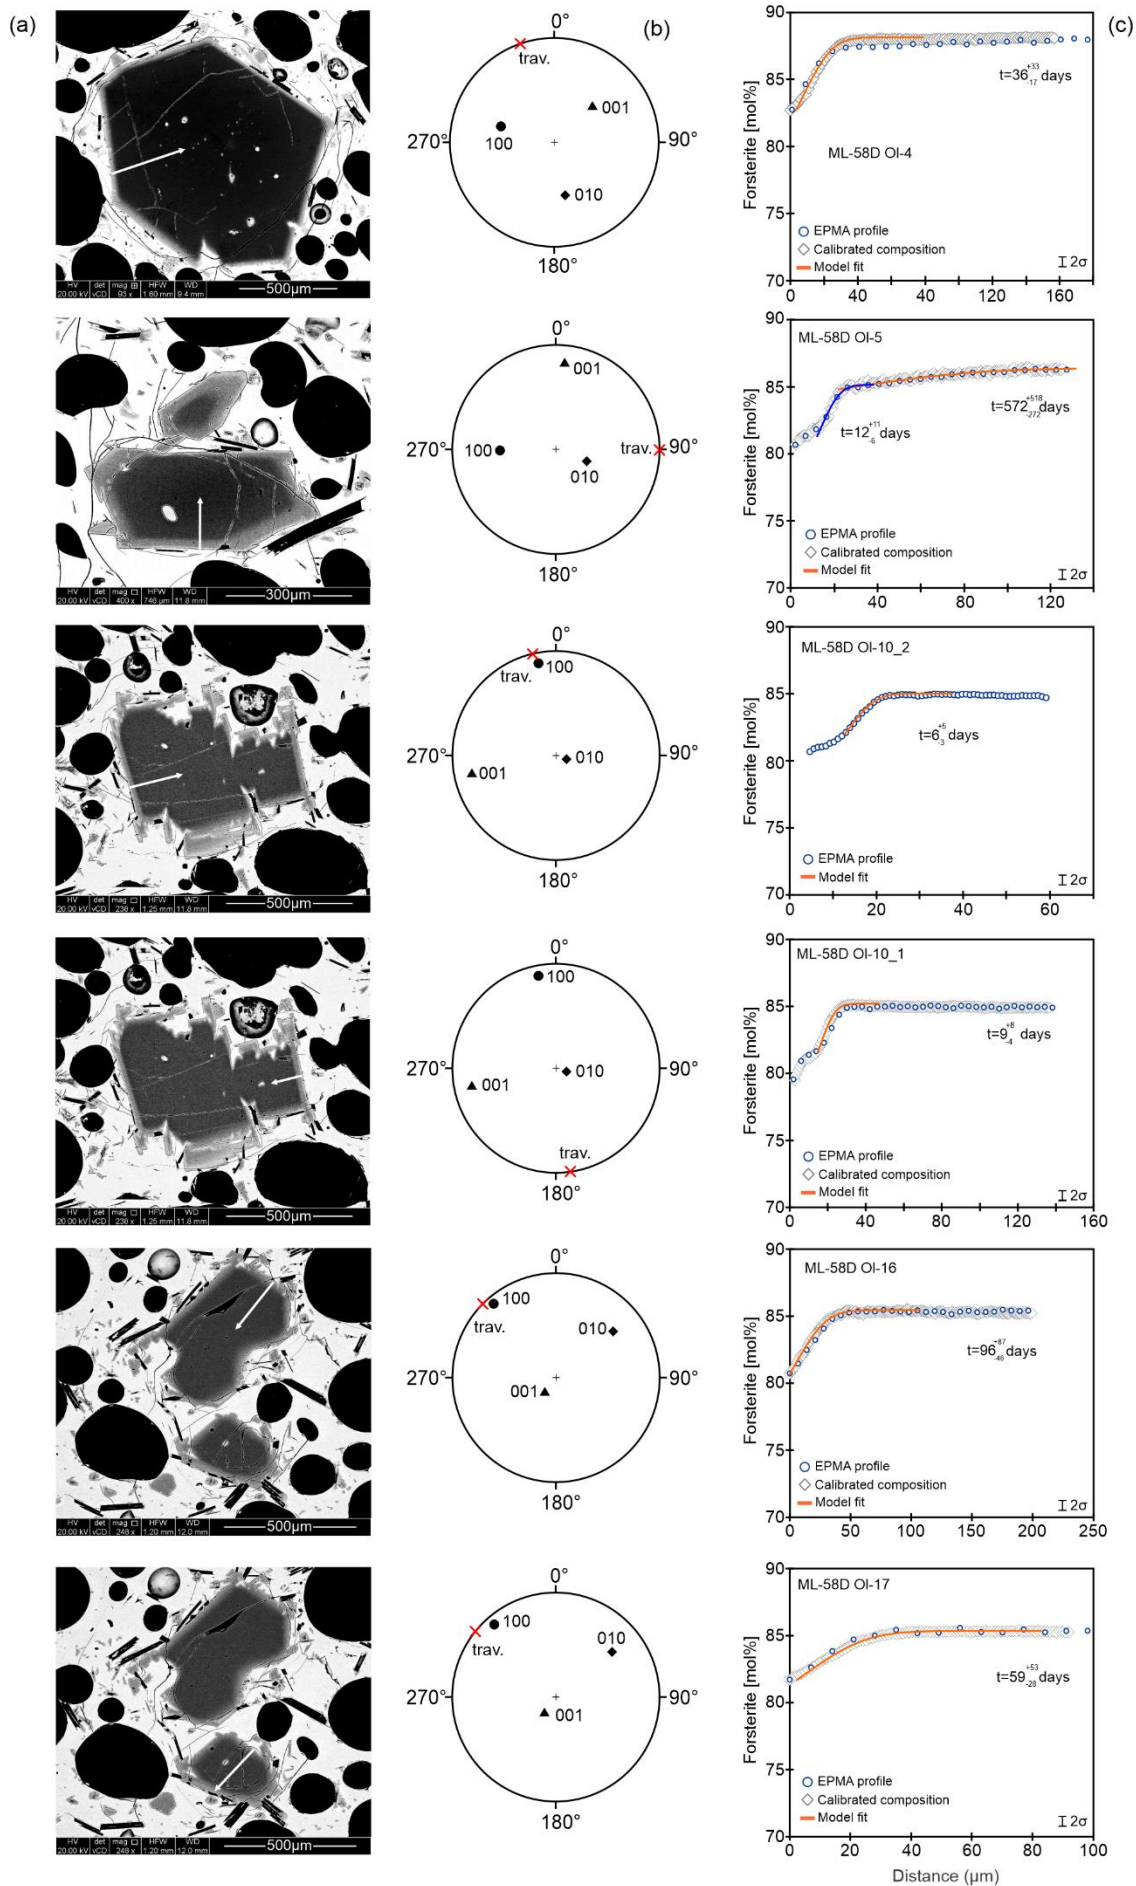

Supplementary Figure S17 - ML-58D

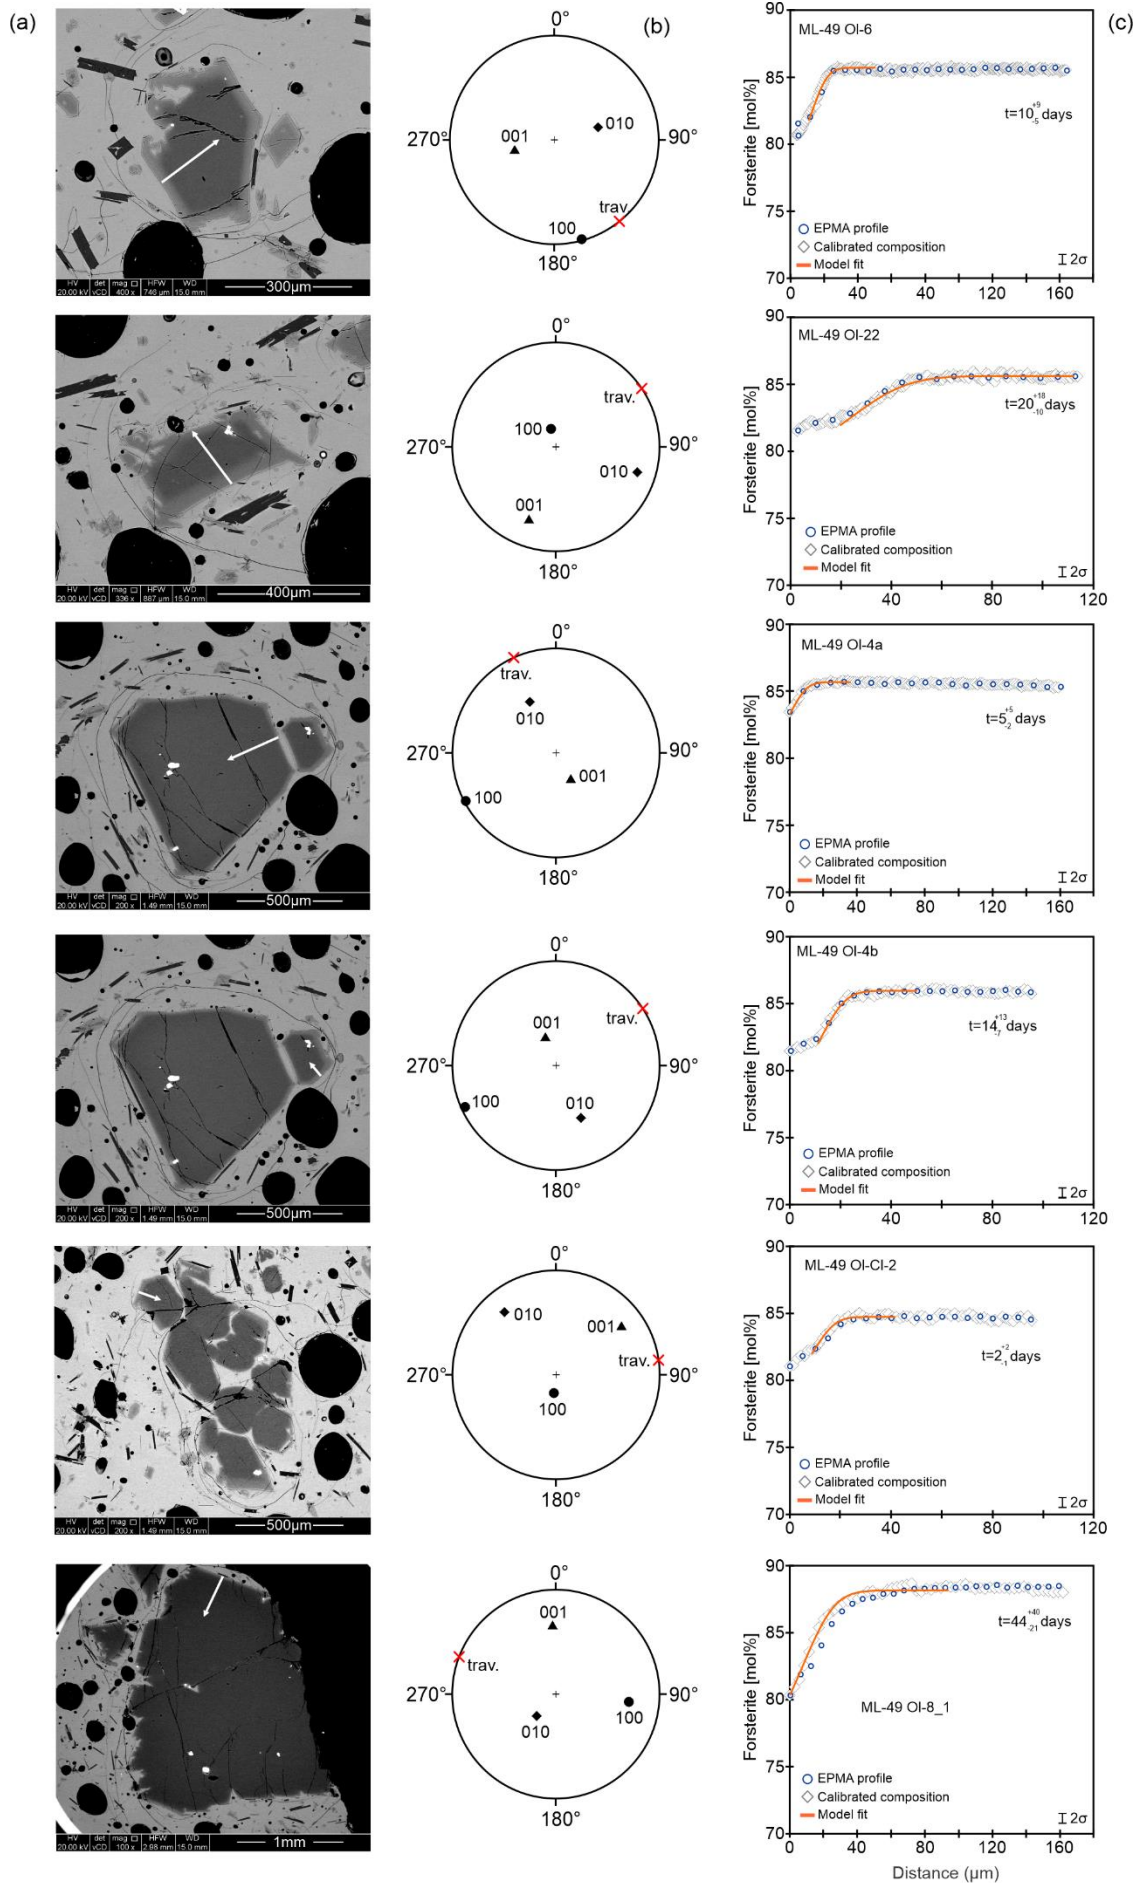

Supplementary Figure S18 - ML-49

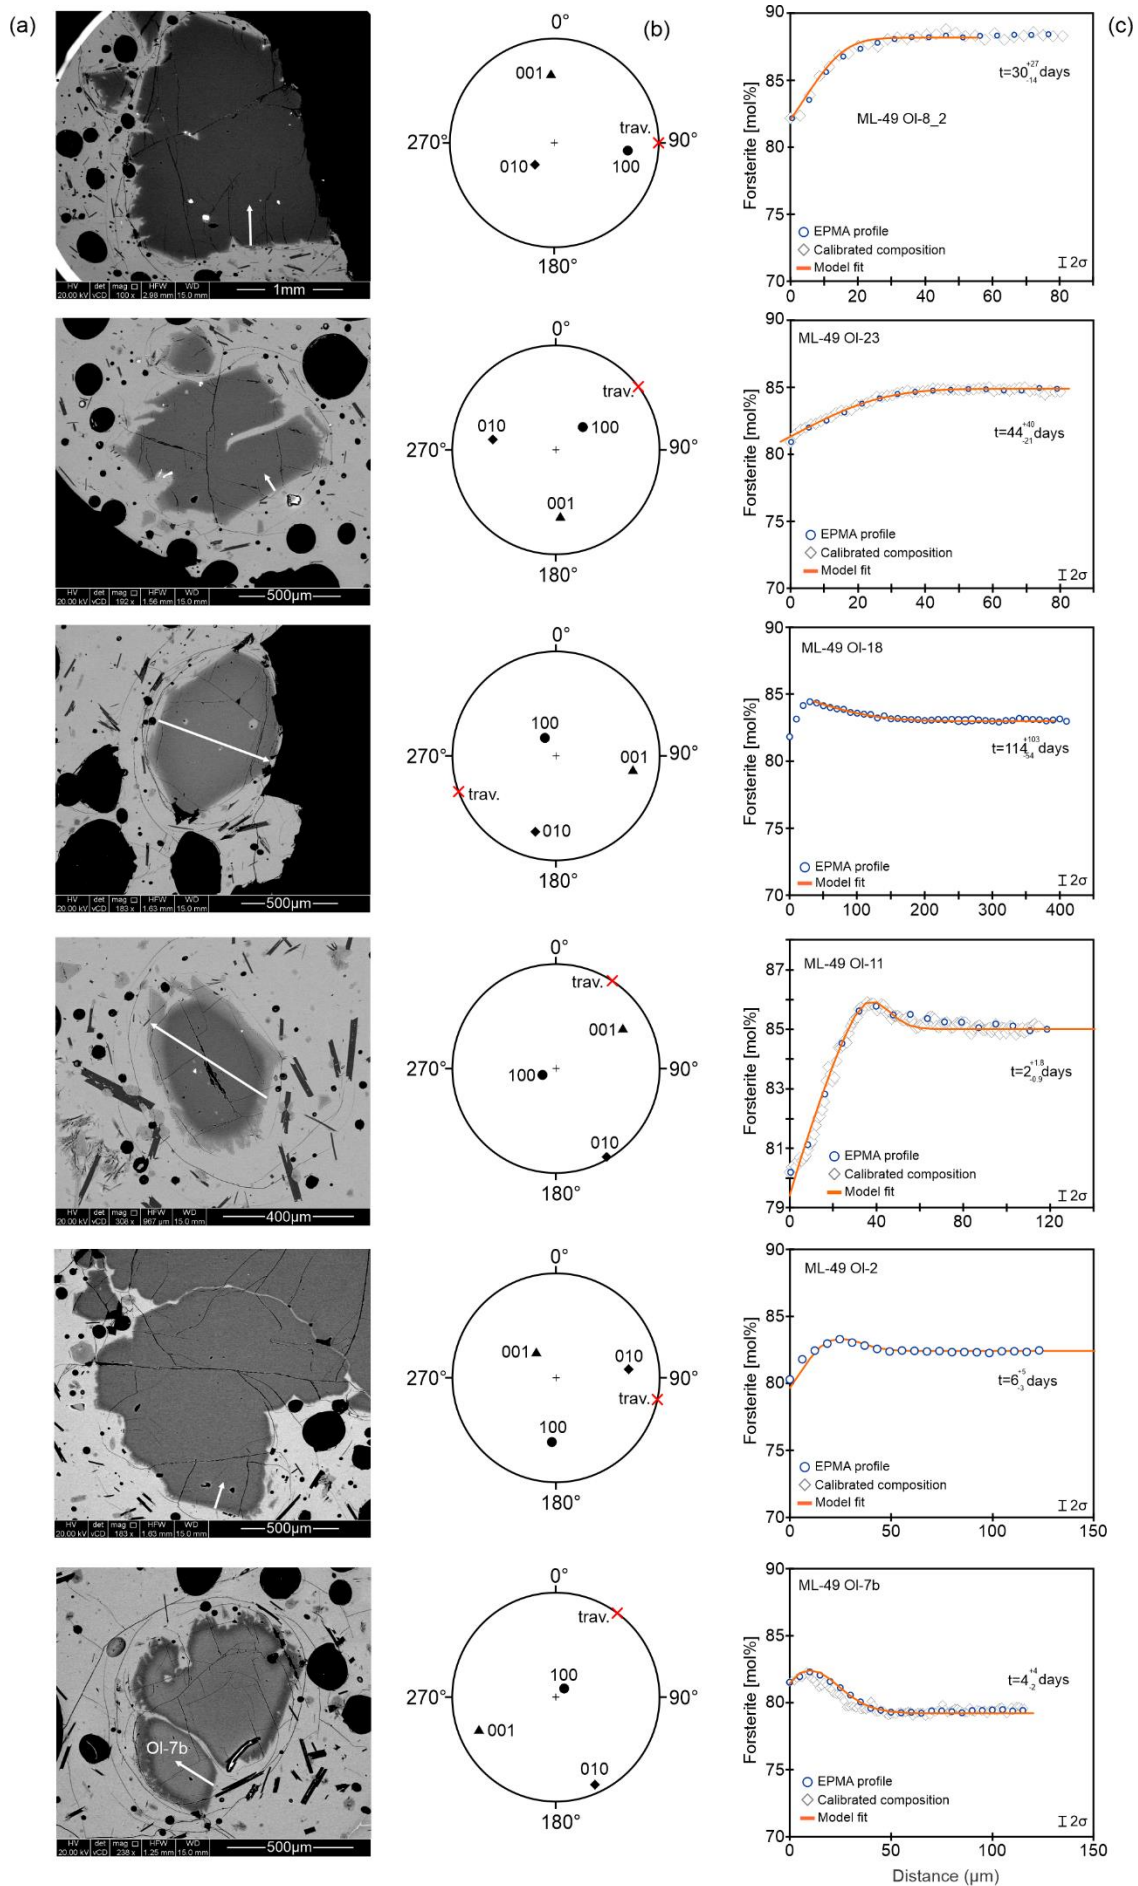

Supplementary Figure S19 - ML-49

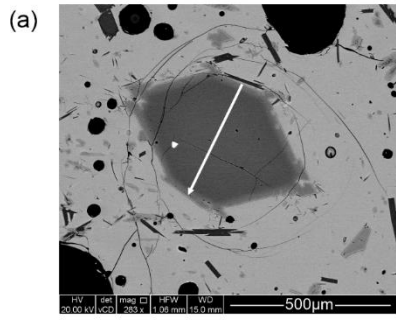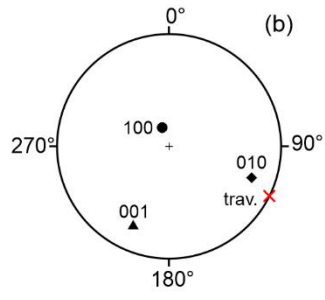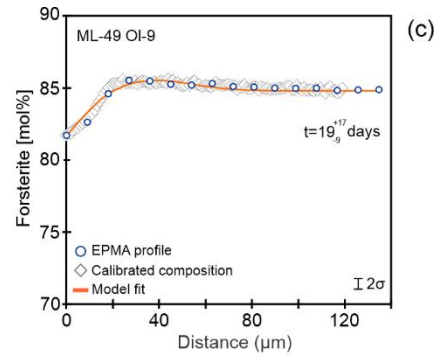

Supplementary Figure S20 -ML-49



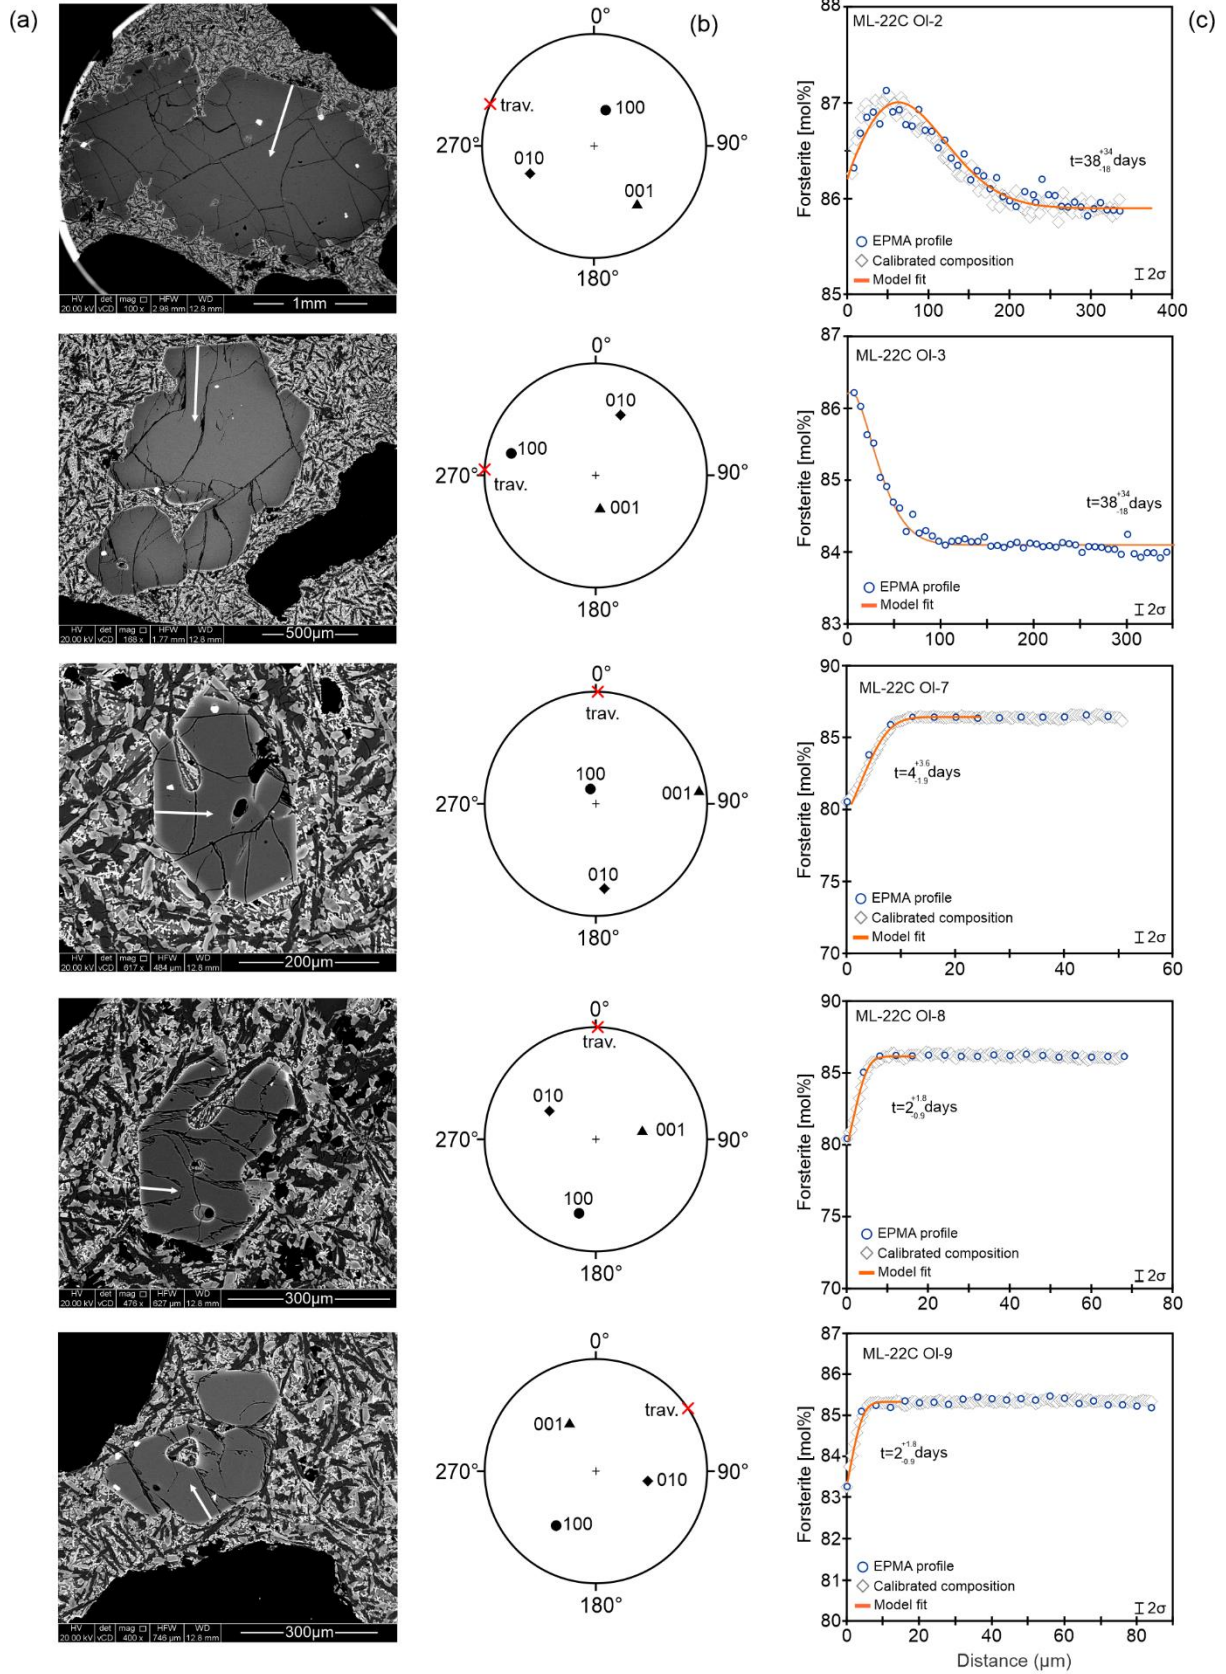

Supplementary Figure S21 - ML-22C

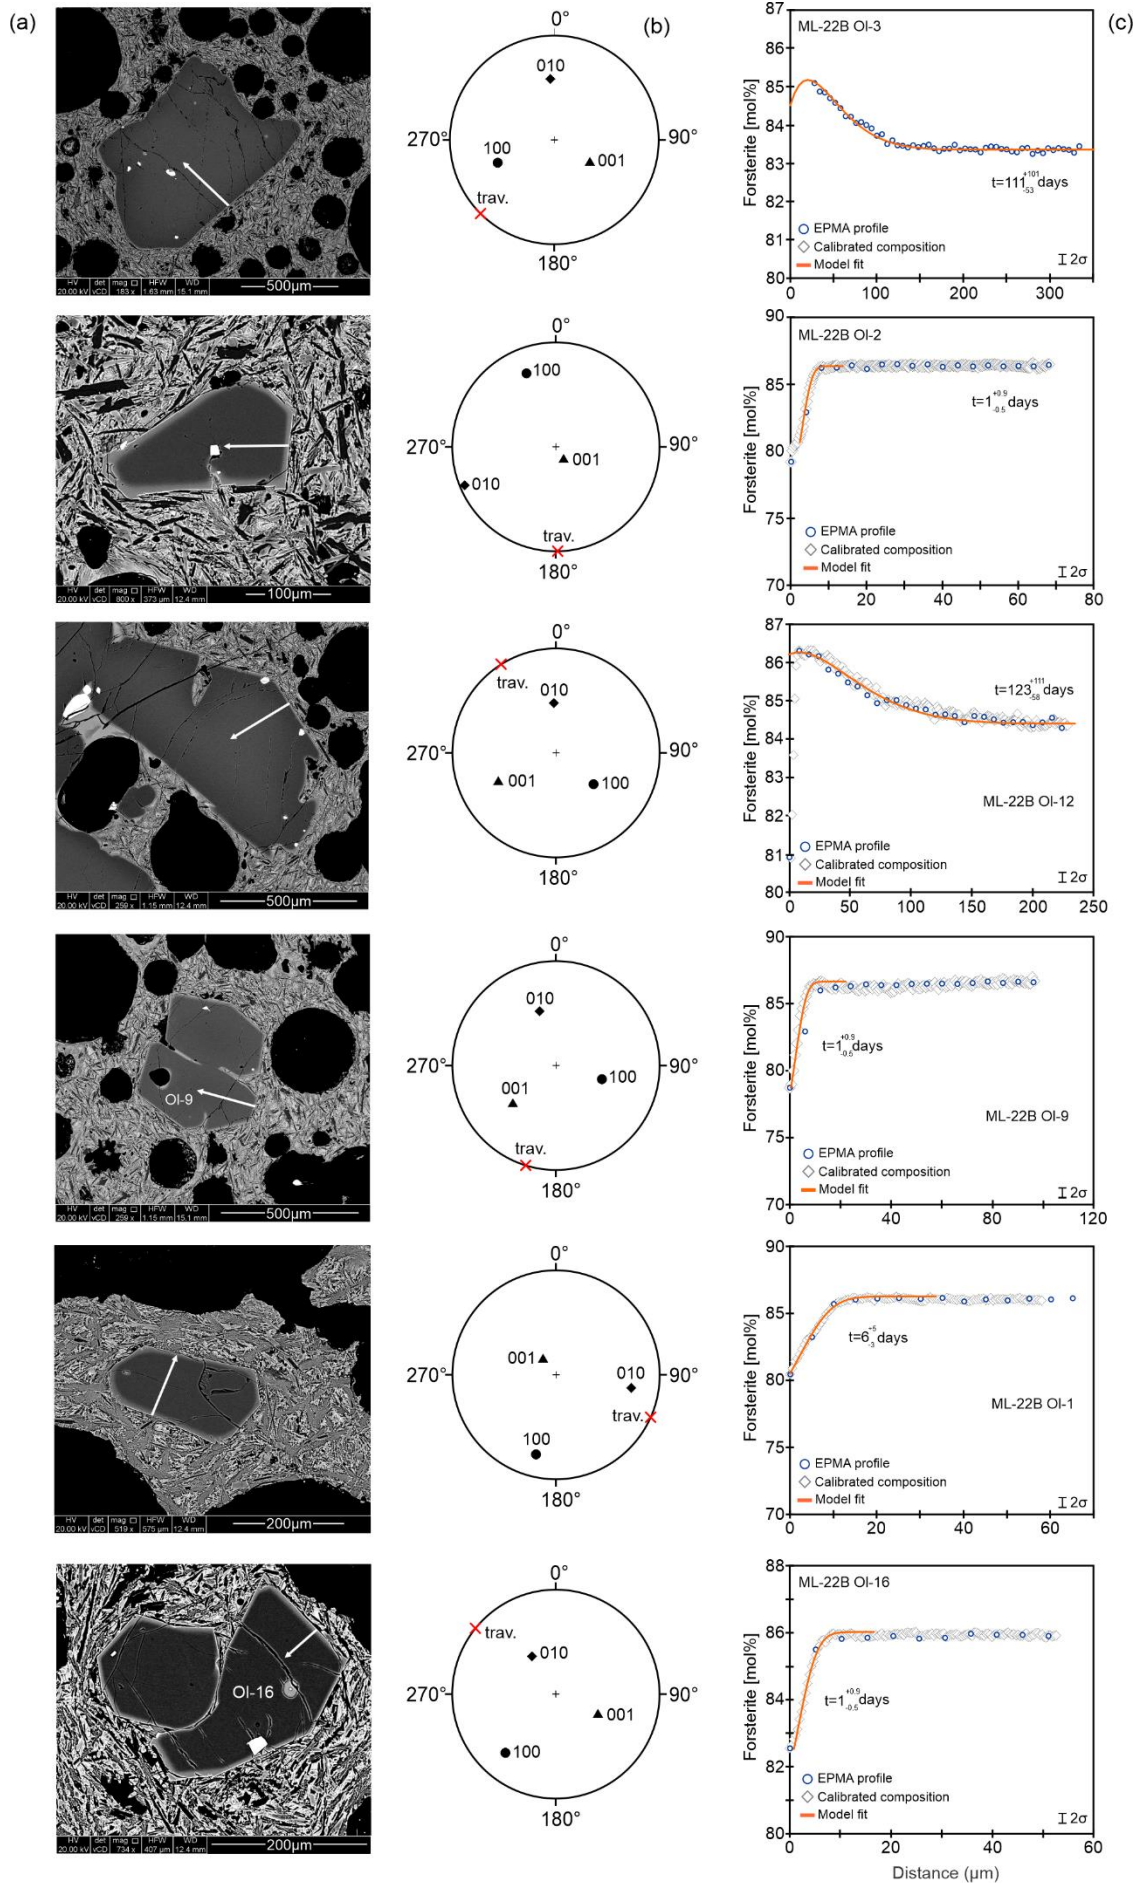

Supplementary Figure S22 - ML-22B

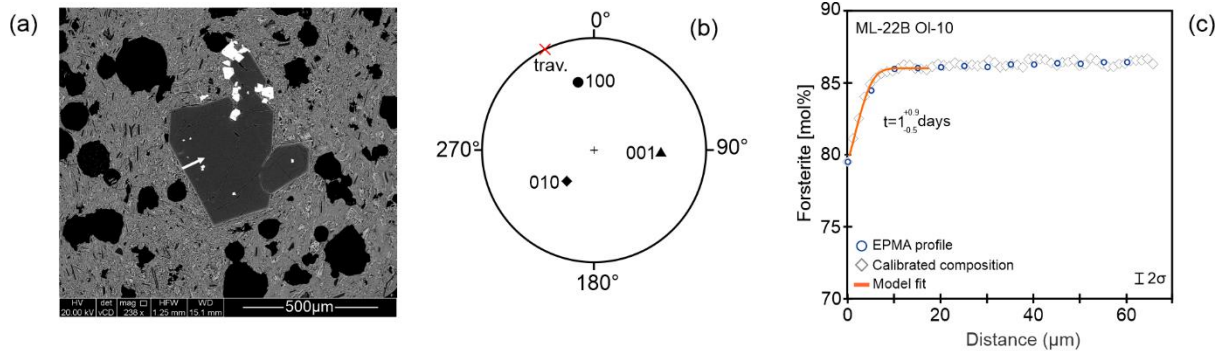

Supplementary Figure S23 - ML-22B



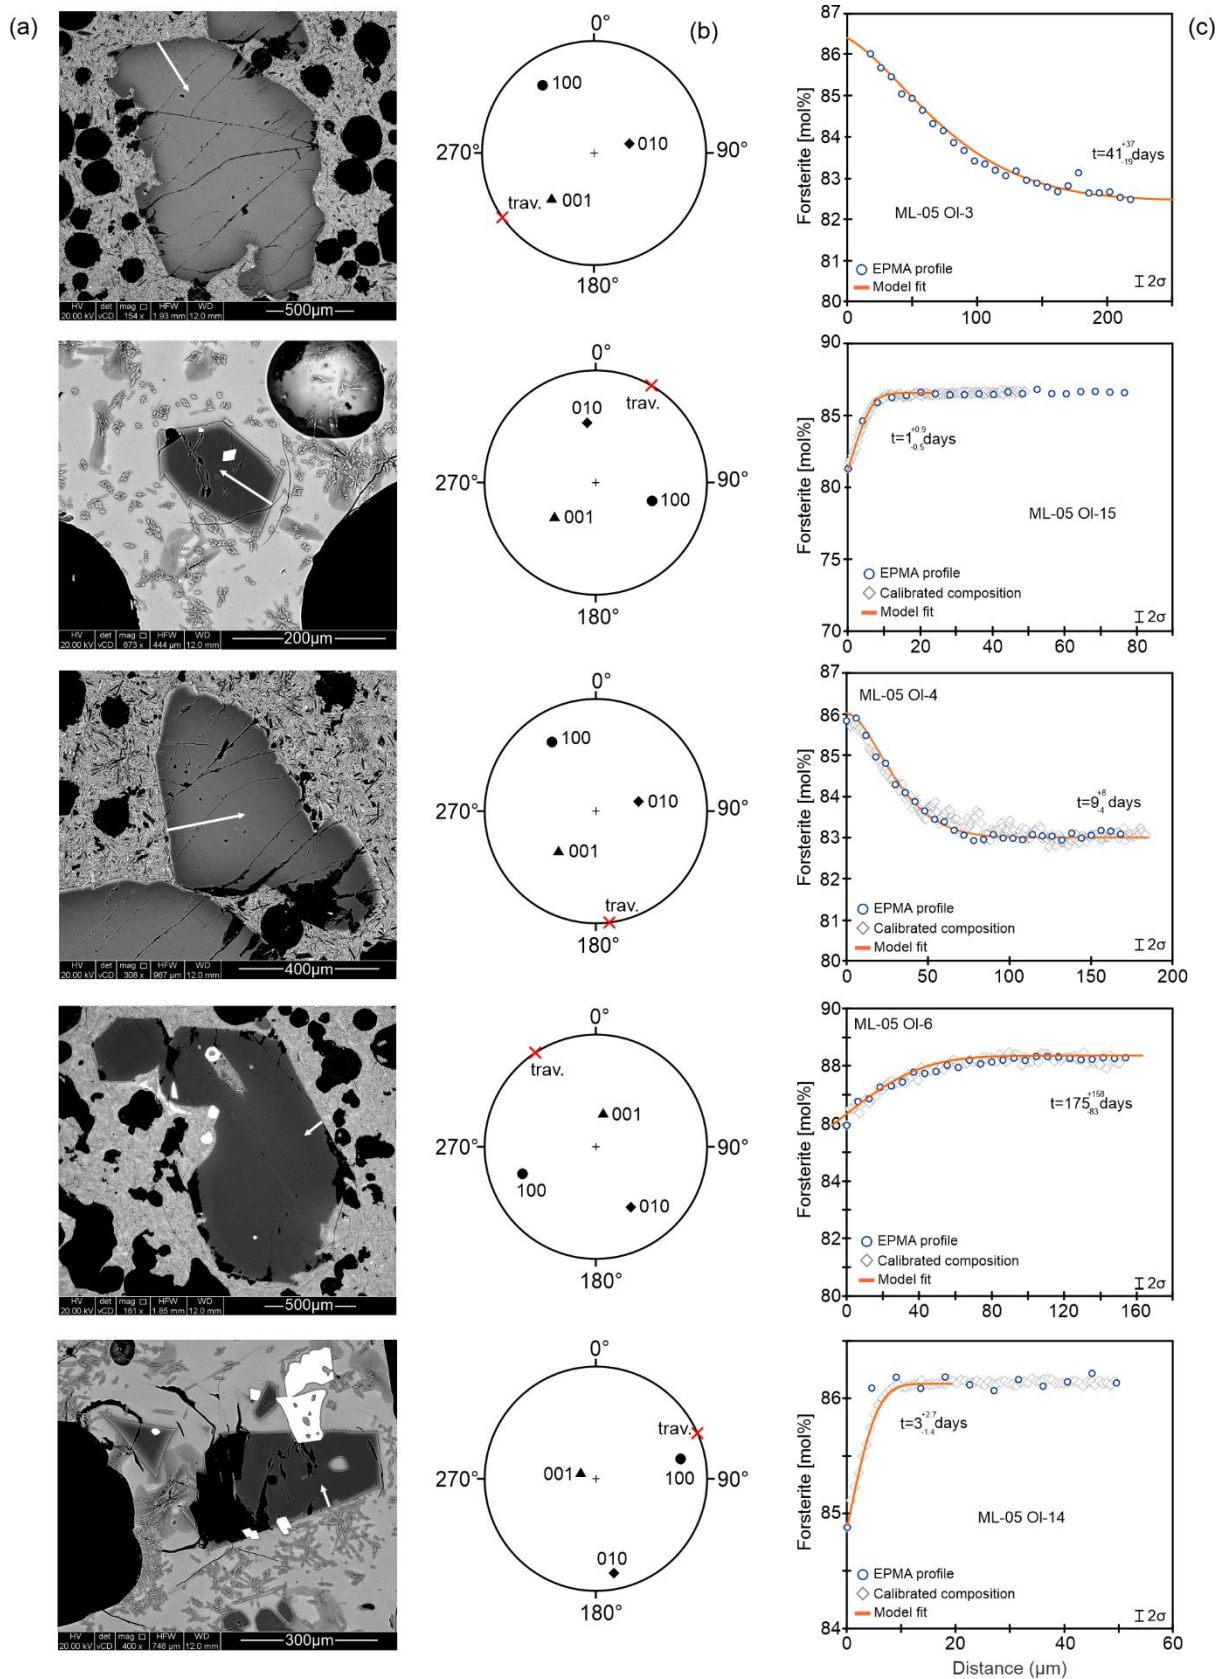

Supplementary Figure S24 - ML-05



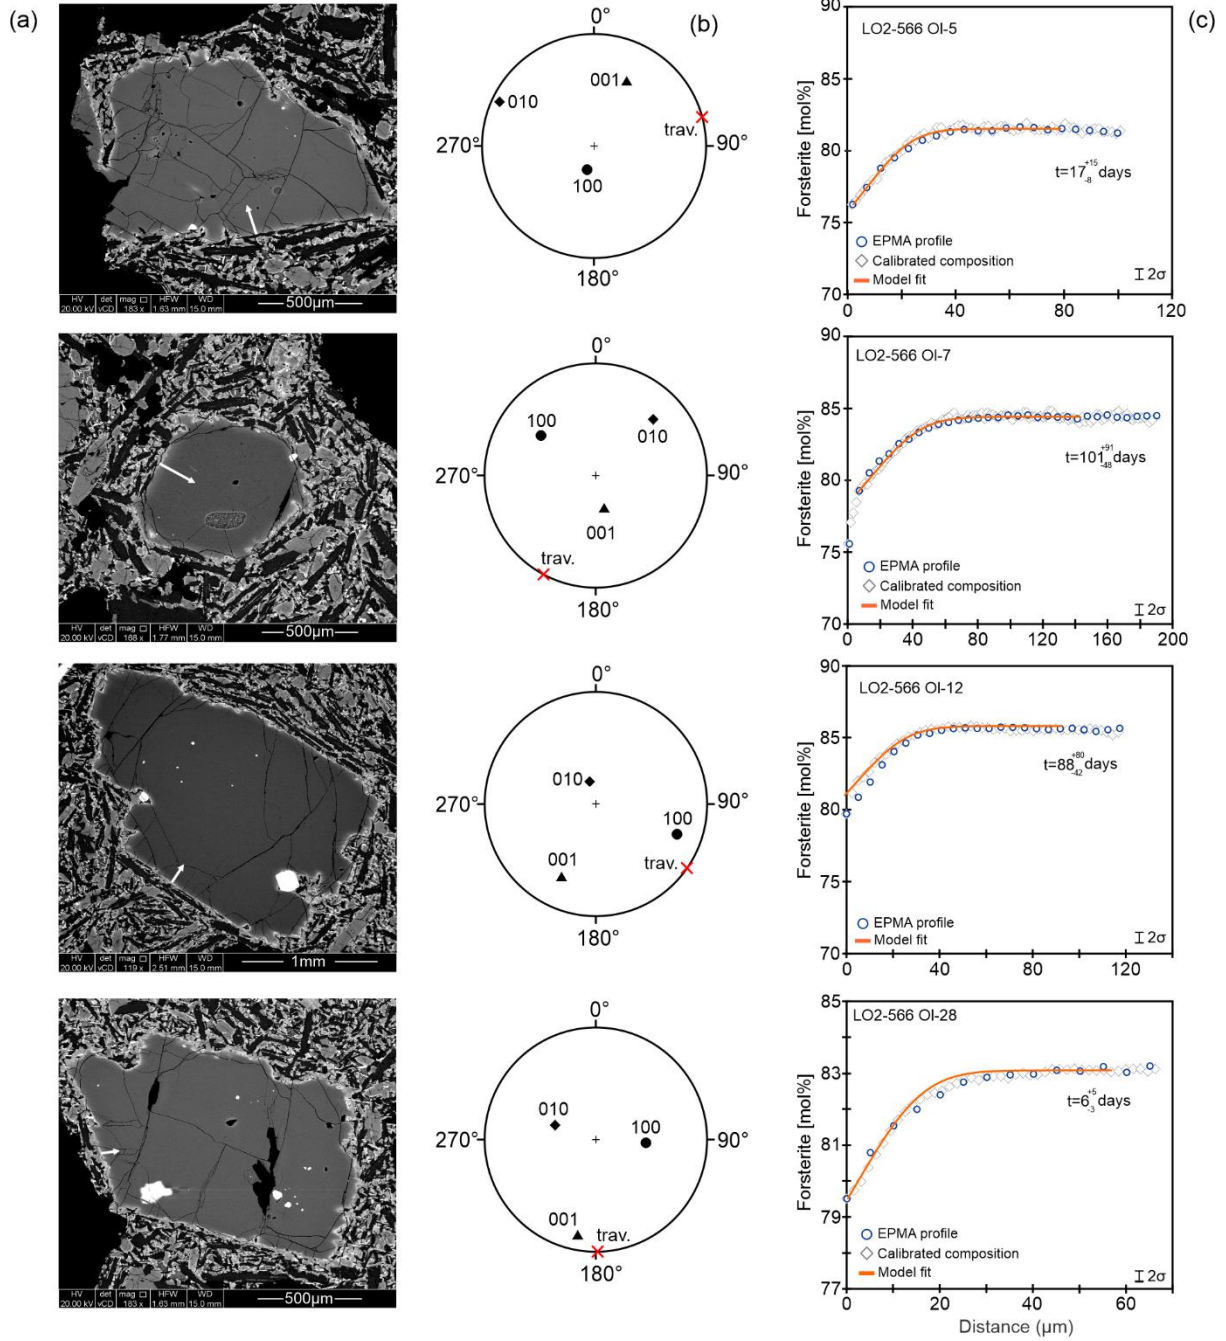

Supplementary Figure S25 - LO2-566

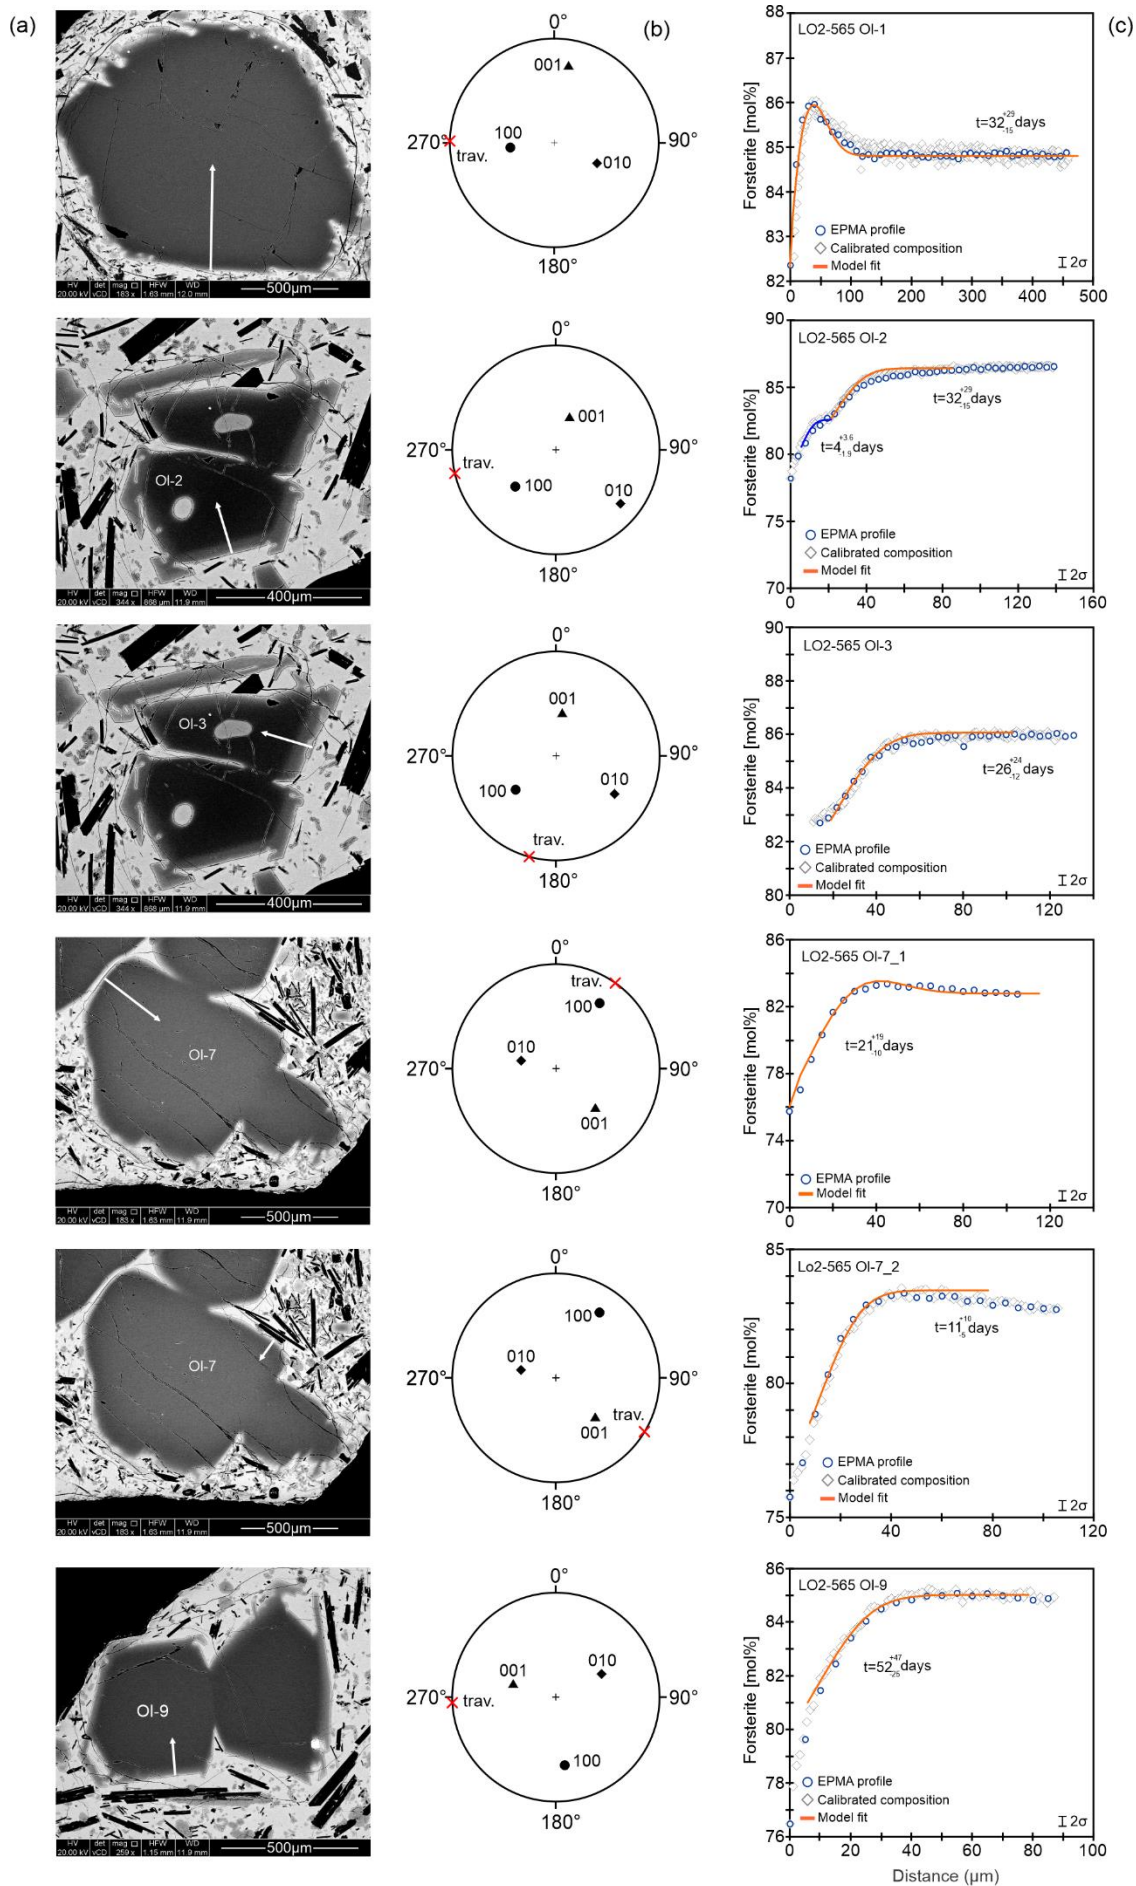

Supplementary Figure S26 - LO2-565



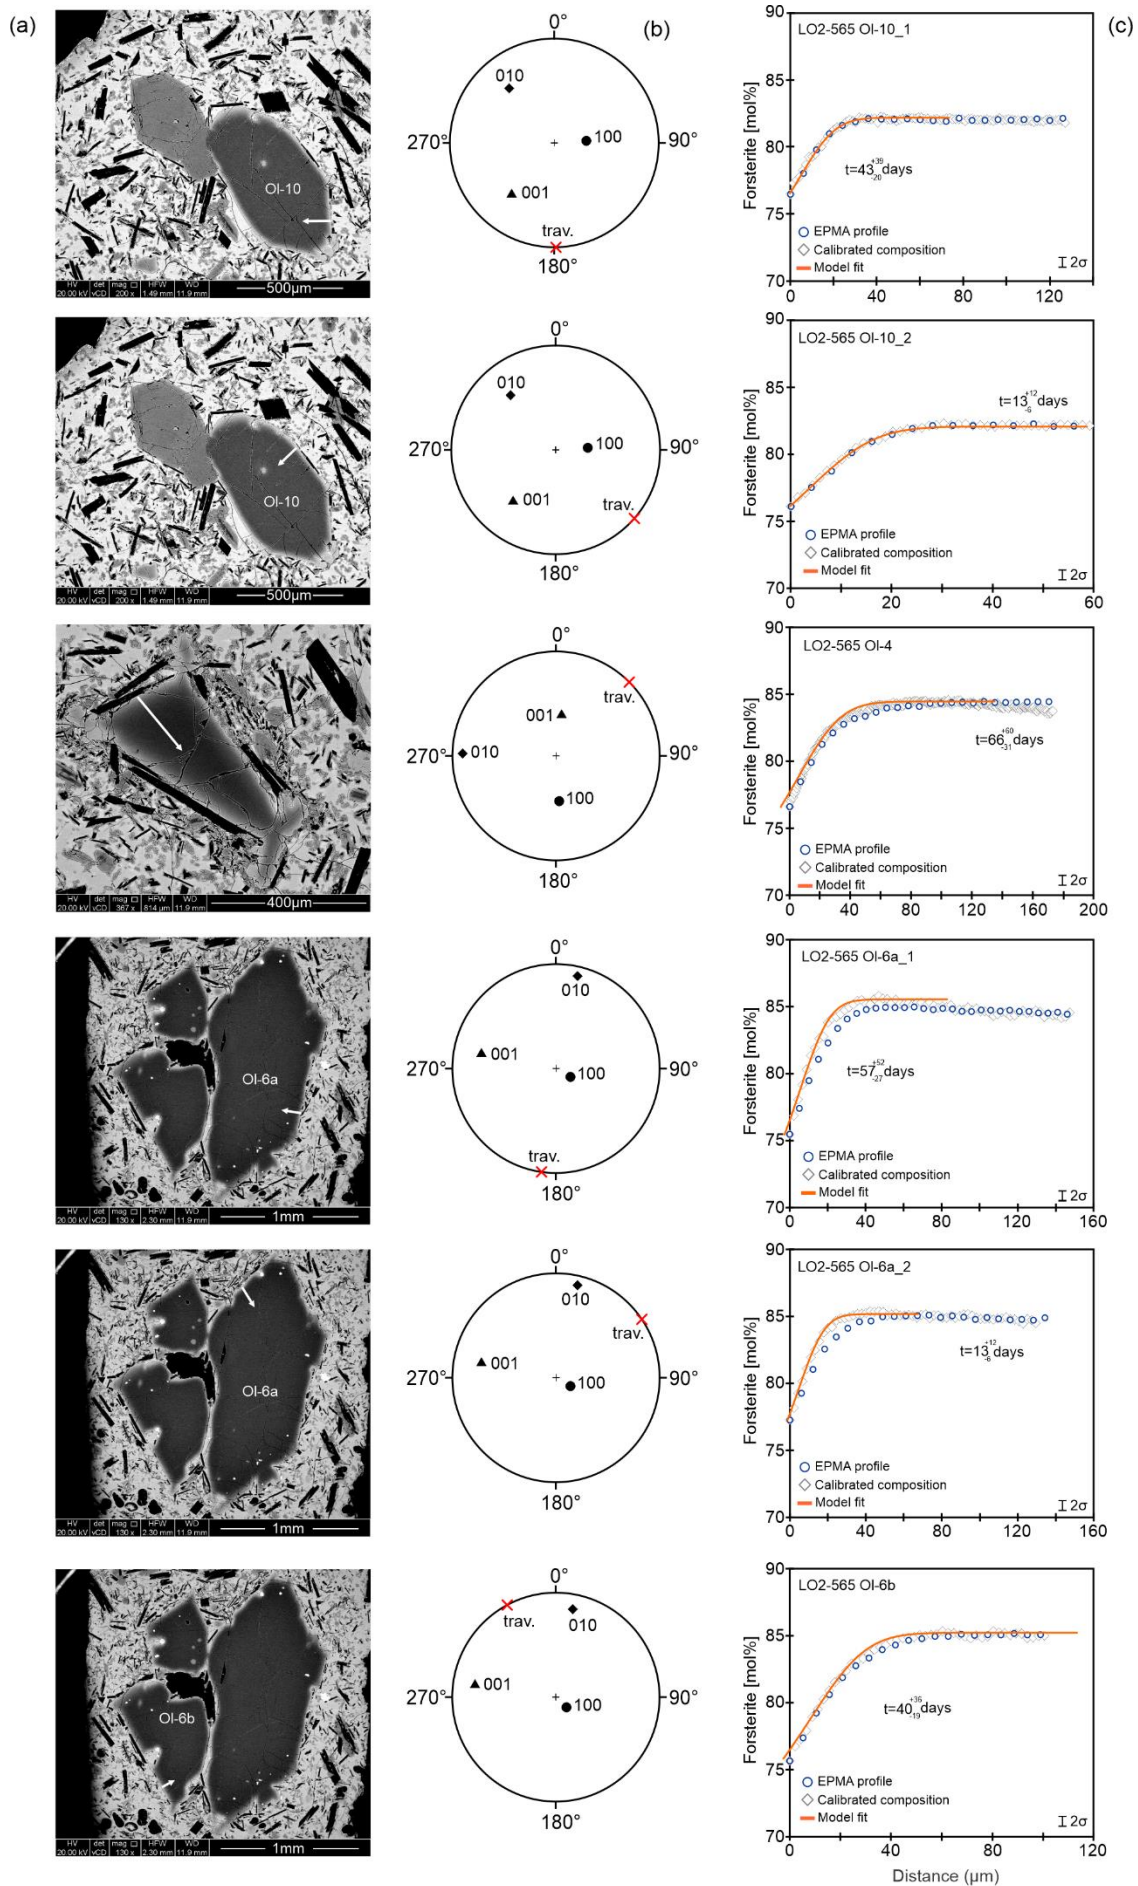

Supplementary Figure S27 - LO2-565



## REFERENCES

- Ariskin AA, Frenkel MY, Barmina GS, and Nielsen RL (1993) COMAGMAT – A Fortran program to model magma differentiation processes: Computers and Geosciences Vol 19, pages 1166-1170. [https://dx.doi.org/10.1016/0098-3004\(93\)90020-6](https://dx.doi.org/10.1016/0098-3004(93)90020-6)
- Armstrong JT (1988) Quantitative analysis of silicates and oxide minerals: comparison of Monte-Carlo, ZAF and Phi–Rho–Z procedures. In: Newbury DE (ed) Proceedings of the Microbeam Analysis Society, Microbeam Analysis Society, San Francisco: 239-246.
- Armstrong JT (1991) Quantitative Elemental Analysis of Individual Microparticles with Electron Beam Instruments. In: Heinrich KFJ, Newbury DE (eds) Electron Probe Quantitation. Springer, Boston, MA. [https://doi.org/10.1007/978-1-4899-2617-3\\_15](https://doi.org/10.1007/978-1-4899-2617-3_15)
- Armstrong JT (1993) Matrix correction program CITZAF, Version 3.5. California Institute of Technology.
- Caracciolo A, Bali E, Guðfinnsson GH, Kahl M, Halldórsson SA, Hartley ME, Gunnarsson H (2020) Temporal evolution of magma and crystal mush storage conditions in the Bárðarbunga-Veiðivötn volcanic system, Iceland. Lithos 352-353. <https://doi.org/10.1016/j.lithos.2019.105234>
- Clark AM, Long JVP (1971) The anisotropic diffusion of nickel in olivine. In: Sherwood, JN, Chadwick, AV, Muir, WM, Swinton, FL (eds) Diffusion Processes. Gordon & Breach: 511-521.

- Costa F, Chakraborty S (2004) Decadal time gaps between mafic intrusion and silicic eruption obtained from chemical zoning patterns in olivine. *Earth Planet Sci Lett* 227: 517-530. <https://doi.org/10.1016/j.epsl.2004.08.011>
- Couperthwaite FK, Morgan DJ, Harvey J, Kahl M (2022) Pre-eruptive timescales from the historical Hapaimamo eruption at Mauna Loa. *J Volcanol Geotherm Res* 432, 107690. <https://doi.org/10.1016/j.jvolgeores.2022.107690>
- Couperthwaite FK, Morgan DJ, Pankhurst MJ, Lee PD, Day JMD (2021) Reducing epistemic and model uncertainty in ionic inter-diffusion chronology: a 3D observation and dynamic modeling approach using olivine from Piton de la Fournaise, La Réunion. *Am Mineral* 106: 481-494. <https://doi.org/10.2138/am-2021-7296CCBY>
- Danyushevsky LV, Plechov P (2011) Petrolog3: Integrated software for modeling crystallization processes. *Geochem Geophys Geosys* 12:1-32. <https://doi.org/10.1029/2011GC003516>
- Davis MG, Garcia MO, Wallace P (2003) Volatiles in glasses from Mauna Loa Volcano, Hawai'i: implications for magma degassing and contamination, and growth of Hawaiian volcanoes. *Contrib Mineral Petrol* 144: 570-591. <https://doi.org/10.1007/s00410-002-0416-z>
- Dohmen R, Becker H-W, Chakraborty S (2007a) Fe–Mg diffusion in olivine I: experimental determination between 700 and 1,200°C as a function of composition, crystal orientation and oxygen fugacity. *Phys Chem Mineral* 34: 389-407. <https://doi.org/10.1007/s00269-007-0157-7>

Donovan J, Kremser D, Fournelle J (2012) Probe for EPMA: Acquisition, automation and analysis. Probe Software, Inc. (Eugene, Oregon).

Jarosewich E (2002) Smithsonian microbeam standards. *Journal of Research of the National Institute of Standards and Technology* 107: 681-685. doi: 10.6028/jres.107.054

Kahl M, Bali E, Guðfinnsson GH, Neave DA, Ubide T, van der Meer QHA, Matthews S (2021) Conditions and Dynamics of Magma Storage in the Snæfellsnes Volcanic Zone, Western Iceland: Insights from the Búðahraun and Berserkjahraun Eruptions. *J Petrol* 62: egab054. <https://doi.org/10.1093/petrology/egab054>

Kahl M, Viccaro M, Ubide T, Morgan DJ, Dingwell DB (2017) A branched magma feeder system during the 1669 eruption of Mt Etna: evidence from a time-integrated study of zoned olivine phenocryst populations. *J Petrol* 58: 443-472. doi:10.1093/petrology/egx022

Kress VC, Carmichael ISE (1988) Stoichiometry of the iron oxidation reaction in silicate melts. *Am Mineral* 73: 1267-1274.

Montierth C, Johnston AD, Cashman KV (1995) An empirical glass- composition-based geothermometer for Mauna Loa lavas. In: Rhodes, JM & Lockwood, JP (eds) *Mauna Loa revealed: structure, composition, history, and hazards*. AGU Monog 92: 207-217. <https://doi.org/10.1029/GM092p0207>

Mutch EJF, MacLennan J, Shorttle O, Rudge JF, Neave DA (2021) DFENS: Diffusion Chronometry Using Finite Elements and Nested Sampling. *Geochem Geophys Geosys* Vol 22., art no. e2020GC009303. <https://dx.doi.org/10.1029/2020GC009303>

- Petrone C, Bugatti G, Braschi E., Tommasini S (2016) Pre-eruptive magmatic processes re-timed using a non-isothermal approach to magma chamber dynamics. *Nature Communications* 7: 12946. <https://doi.org/10.1038/ncomms12946>
- Prior DJ, Boyle AP, Brenker F, Cheadle MC, Day A, Lopez G, Peruzzi L, Potts G, Reddy S, Spiess R, Timms NE (1999) The application of electron backscatter diffraction and orientation contrast imaging in the SEM to textural problems in rocks. *Am Mineral* 84: 1741-1759.
- Putirka KD 2008 Thermometers and barometers for volcanic systems. *Rev Mineral Geochem* 69: 61-120. <https://doi.org/10.2138/rmg.2008.69.3>
- Roeder PL, Emslie RF (1970) Olivine-liquid equilibrium. *Contrib Mineral Petrol* 29: 275-289.
- Rhodes JM (1988) Geochemistry of the 1984 Mauna Loa eruption: implications for magma storage and supply. *J Geophys Res Solid Earth* 93, B5: 4453-4466.
- Shea T, Matzen AK, Mourey AJ (2022) Experimental study of Fe–Mg partitioning and zoning during rapid growth of olivine in Hawaiian tholeiites. *Contrib Mineral Petrol* 177:114. <https://doi.org/10.1007/s00410-022-01969-8>
- Thornber CR, Sherrod DR, Siems DF, Heliker CC, Meeker GP, Oscarson RL, Kauahikaua JP (2002) Whole-rock and glass major-element geochemistry of Kīlauea Volcano, Hawai‘i, near-vent eruptive products: September 1994 through September 2001. *USGS Open File Rep 02-17*: 41.
- Thornber CR (2001) Olivine-liquid relations of lava erupted by Kīlauea volcano from 1994-1998: implications for shallow magmatic processes associated with the ongoing east rift zone eruption. *Canadian Mineralogist* 39: 239-266. <https://doi.org/10.2113/gscanmin.39.2.239>



Wieser PE, Kent AJR, Till CB, Donovan J, Neave DA, Blatter DL, Krawczynski MJ (2022)

Barometers Behaving Badly I: Assessing the Influence of Analytical and Experimental Uncertainty on Clinopyroxene Thermobarometry Calculations at Crustal Conditions. *Journal of Petrology* 2023: 64, egac126.

<https://doi.org/10.1093/petrology/egac126>
