# Supplementary material for: Dynamics of magma mixing and magma mobilisation beneath Mauna Loa—insights from the 1950 AD Southwest Rift Zone eruption
Source: Springer Nature journal article supplement (doi:10.1007/s00445-023-01680-x), 2023-11-29
Supplement: MOESM2 [file 445_2023_1680_MOESM2_ESM.xlsx]

## Sheet: 1-Sample overview
Supplementary Data Table_S1: 1950 AD SWRZ eruption sample suite locations and sample types
Sample name	Field No.	Sample Type	ELVEV	ELEV	Latitude	Longitude	Field Notes
			m	ft
ML-1	CRT02-ML1	flow	274.323	900	19.2666	-155.875	HWY 11, mi #23
ML-2	CRT02-ML2	flow	274.323	900	19.2645	-155.874	HWY 11, mi #23+
ML-4	CRT02-ML4	flow	274.323	900	19.3401	-155.873	N. Honakua Flow
ML-5†	CRT02-ML5	spatter	2996.22	9830	19.3554	-155.667	rift crack spatter
ML-6	CRT02-ML6	flow	2990.12	9810	19.3554	-155.668	shelly; Younger than ML5
ML-10	CRT02-ML10	flow	2995.92	9829	19.3547	-155.665	slabby;
ML-11	CRT02-ML11	flow	2996.22	9830	19.3558	-155.666
ML-12A	CRT02-ML12A	spatter	2999.27	9840	19.3569	-155.665	shelly; Older than ML12a
ML-12B	CRT02-ML12B	flow	2999.27	9840	19.3569	-155.665	shelly; Older than ML12a
ML-13	CRT02-ML13	flow	3023.65	9920	19.3584	-155.664	dark shelly; Younger than ML12b+a
ML-14	CRT02-ML14	spatter	3035.84	9960	19.3596	-155.663	Same age as ML13(?)
ML-16	CRT02-ML16	spatter	3086.14	10125	19.364	-155.659	covered by shelly phh to SE which is turn covered by 'a'a to NW;
ML-18	CRT02-ML18	spatter	3182.15	10440	19.3715	-155.653	postdates gold shelly phh, predates 'a'a from NW side;
ML-20	CRT02-ML20	spatter	3269.02	10725	19.3771	-155.647	postdates gold shelly phh, predates 'a'a on both sides of rift crack; Younger thanML21
ML-21	CRT02-ML21	flow	3276.64	10750	19.3784	-155.646	shelly-a'a' trans/close to vent; Older than ML20
ML-22A	CRT02-ML22A	flow	3291.88	10800	19.3784	-155.646	black slabby phh; Younger than ML22b
ML-22B†	CRT02-ML22B	spatter	3291.88	10800	19.3784	-155.646	black slabby phh; Younger than ML22b
ML-22C†	CRT02-ML22C	flow	3291.88	10800	19.3784	-155.646	black slabby phh; Younger than ML22b
ML-23	CRT02-ML23	flow	2980.98	9780	19.3533	-155.668	black phh ooze-up; on back side of Pu`u`on mauka side of large pit crater;
ML-25	CRT02-ML25	spatter	2913.92	9560	19.347	-155.674	rift crack spatter; postdates major flow from NW mauka;
ML-26	CRT02-ML26	spatter	2889.54	9480	19.345	-155.676	rift crack spatter; from makai end of long continuous rift crack; crack offset by ~60m to NW; Younger than ML28
ML-27	CRT02-ML27	flow	2890.45	9483	19.3452	-155.677	rift crack flow/spatter; from blow out at point were rift crack is offset; Same age as ML26
ML-28	CRT02-ML28	flow	2889.54	9480	19.3451	-155.677	big golden shelly phh underlying rift crack spatter ; Older than ML26
ML-29A	CRT02-ML29A	flow	3901.49	12800	19.4289	-155.61	Lua Ho ; ; Younger than ML29A
ML-29B	CRT02-ML29B	spatter	3901.49	12800	19.4289	-155.61	Lua Ho ; ; Younger than ML29A
ML-31A	CRT02-ML31A	flow	3889.3	12760	19.4264	-155.611	reticulite/spaater on top of 31A flow; Younger than ML31A; Same age as ML29B
ML-31B	CRT02-ML31B	spatter	3889.3	12760	19.4264	-155.611	reticulite/spaater on top of 31A flow; Younger than ML31A; Same age as ML29B
ML-32	CRT02-ML32	flow	3877.1	12720	19.4242	-155.612	SMALL NEW FLOW eminating from crack; flow from above feeds into crack; Younger than ML31A; Same age as ML29B
ML-33A	CRT02-ML33A	flow	3864.91	12680	19.422	-155.613	rift crack spatter; Younger than ML33A
ML-33B	CRT02-ML33B	spatter	3864.91	12680	19.422	-155.613	rift crack spatter; Younger than ML33A
ML-35	CRT02-ML35	spatter	3851.19	12635	19.4202	-155.614	-
ML-37	CRT02-ML37	spatter	3803.95	12480	19.4165	-155.617	Spatter covers a'a' and shelly flow;
ML-39B	CRT02-ML39B	spatter	3791.76	12440	19.4151	-155.618	black phh; Younger than ML39B
ML-39C	CRT02-ML39C	flow	3791.76	12440	19.4151	-155.618	black phh; Younger than ML39B
ML-40	CRT02-ML40	spatter	3767.37	12360	19.4126	-155.62	-
ML-42	CRT02-ML42	spatter	3669.84	12040	19.4034	-155.626	Spatter and minor phh flow from crack;
ML-43A	CRT02-ML43A	spatter	3621.07	11880	19.4004	-155.629	Dense more plag-ol phyric than A ; Younger than ML43A
ML-43B	CRT02-ML43B	spatter	3621.07	11880	19.4004	-155.629	Dense more plag-ol phyric than A ; Younger than ML43A
ML-44	CRT02-ML44	flow	3550.96	11650	19.3964	-155.632	dark slabby facies of gold shelly, is continuous with gold shelly; rare, mm-sized olv;
ML-45	CRT02-ML45	spatter	3485.43	11435	19.3917	-155.635	rift crack spatter, uprift of Sulfer Cone;
ML-47	CRT02-ML47	spatter	3483.91	11430	19.3917	-155.635	large spatter rampart/flow; overlies gold shelly phh;
ML-48	CRT02-ML48	flow	3035.84	9960	19.3587	-155.662	bulbous phh near cone above camp 2; Younger than ML51
ML-49†	CRT02-ML49	flow	2735.61	8975	19.3262	-155.692	hornito; large olivines;
ML-50	CRT02-ML50	spatter	2746.28	9010	19.3287	-155.691	Younger than ML48
ML-51	CRT02-ML51	flow	2727.99	8950	19.3254	-155.694	shelly phh covering most of area; ; Older than ML48
ML-52	CRT02-ML52	spatter	2724.95	8940	19.3244	-155.694	tephra + spatter from mauka end of high rampart; 1 cm olivines; Younger than ML48
ML-54Z	CRT02-ML54Z	flow	2712.75	8900	19.3212	-155.696	VERY BOTTOM BELOW A; Older than ML54 A
ML-54A2	CRT02-ML54A2	flow	2712.75	8900	19.3212	-155.696	VERY BOTTOM BELOW A; Older than ML54 A
ML-54B	CRT02-ML54B	flow	2712.75	8900	19.3212	-155.696	VERY BOTTOM BELOW A; Older than ML54 A
ML-54B2	CRT02-ML54B2	flow	2712.75	8900	19.3212	-155.696	VERY BOTTOM BELOW A; Older than ML54 A
ML-54C	CRT02-ML54C	flow	2712.75	8900	19.3212	-155.696	VERY BOTTOM BELOW A; Older than ML54 A
ML-54C3	CRT02-ML54C3	flow	2712.75	8900	19.3212	-155.696	VERY BOTTOM BELOW A; Older than ML54 A
ML-54C4	CRT02-ML54C4	flow	2712.75	8900	19.3212	-155.696	VERY BOTTOM BELOW A; Older than ML54 A
ML-56A	CRT02-ML56A	flow	2694.46	8840	19.318	-155.697	spatter rampart; Younger than ML56C
ML-56B	CRT02-ML56B	spatter	2694.46	8840	19.318	-155.697	spatter rampart; Younger than ML56C
ML-56C	CRT02-ML56C	flow	2694.46	8840	19.318	-155.697	spatter rampart; Younger than ML56C
ML-56D	CRT02-ML56D	spatter	2694.46	8840	19.318	-155.697	spatter rampart; Younger than ML56C
ML-57	CRT02-ML57	flow	2682.27	8800	19.317	-155.698	channel flow from crack floods area SE of rampart;
ML-58A†	CRT02-ML58A	flow	2670.08	8760	19.3155	-155.7	rift crack spatter; Younger than ML58C
ML-58B	CRT02-ML58B	spatter	2670.08	8760	19.3155	-155.7	rift crack spatter; Younger than ML58C
ML-58C†	CRT02-ML58C	flow	2670.08	8760	19.3155	-155.7	rift crack spatter; Younger than ML58C
ML-58D†	CRT02-ML58D	spatter	2670.08	8760	19.3155	-155.7	rift crack spatter; Younger than ML58C
ML-60	CRT02-ML60	flow	2414.05	7920	19.2846	-155.726	boot of italy phh channel;
ML-61	CRT02-ML61	flow	2453.67	8050	19.293	-155.724	a'a' from NW ~ 1km offset fissure; Younger than ML62
ML-62	CRT02-ML62	flow	2411	7910	19.2885	-155.731	ponded phh from crack coverd by ML61 a'a' flow; Older than ML61
ML-63	CRT02-ML63	spatter	2401.85	7880	19.287	-155.731	early crack spatter covered by a'a' flow; Older than ML61
ML-64A	CRT02-ML64A	flow	2353.08	7720	19.2804	-155.735	sw extension of w fissure, early flow
ML-64B	CRT02-ML64B	spatter	2353.08	7720	19.2804	-155.735	late spatter
ML-65	CRT02-ML65	flow	2353.08	7720	0	0	flow around last camp
SW-1	CRT02-SW1	flow	2974.88	9760	19.3539	-155.669
SW-2	CRT02-SW2	spatter	2962.69	9720	19.3515	-155.67
SW-4	CRT02-SW4	spatter	2801.15	9190	19.3373	-155.683
SW-5	CRT02-SW5	spatter	2782.86	9130	19.3347	-155.686
SW-6	CRT02-SW6	spatter	2746.28	9010	19.3309	-155.689
SW-7	CRT02-SW7	spatter	2624.36	8610	19.308	-155.705
SW-8	CRT02-SW8	spatter	2601.5	8535	19.3045	-155.707
SW-9	CRT02-SW9	flow	2602.41	8538	19.3052	-155.708
SW-10	CRT02-SW10	flow	2636.55	8650	19.3137	-155.704
SW-11A	CRT02-SW11A	spatter	2575.59	8450	19.2995	-155.71
SW-11B	CRT02-SW11B	flow	2575.59	8450	19.2995	-155.71
SW-12A	CRT02-SW12A	spatter	2535.97	8320	19.2936	-155.713
SW-12B	CRT02-SW12B	flow	2535.97	8320	19.2936	-155.713
SW-13	CRT02-SW13	flow	2529.87	8300	19.2929	-155.709
SW-14A	CRT02-SW14A	flow	2514.63	8250	19.2901	-155.715
SW-14B	CRT02-SW14B	flow	2514.63	8250	19.2901	-155.715
SW-14C	CRT02-SW14C	flow	2514.63	8250	19.2901	-155.715
SW-14D	CRT02-SW14D	flow	2514.63	8250	19.2901	-155.715
77	L-94-77	flow	3931.97	12900	0	0
LO2-525	L-02-525	flow	3834.43	12580	19.4168	-155.612
LO2-531	L-02-531	flow	3557.06	11670	19.3939	-155.626
LO2-533	L-02-533	flow	3413.8	11200	0	0
LO2-555	L-02-555A	flow	2484.15	8150	19.2858	-155.719
LO2-565†	L-02-565B	flow	2353.08	7720	19.2682	-155.728
LO2-556	L-02-556	flow	2491.77	8175	19.2858	-155.718
LO2-559	L-02-559	flow	2462.81	8080	19.2833	-155.719
LO2-560	L-02-560	flow	2450.62	8040	19.2825	-155.72
LO2-561	L-02-561	flow	2401.85	7880	19.276	-155.724
LO2-565	L-02-565A	flow	2353.08	7720	19.2682	-155.728
LO2-566†	L-02-566	flow	2346.99	7700	19.2682	-155.728
ML-36	CRT02-ML36		3834.43	12580	19.4188	-155.615	BLACK PHH; Older than ML35
ML-38A	CRT02-ML38A		3794.81	12450	19.4155	-155.617	a'a from NE; Younger than ML38B
ML-38B	CRT02-ML38B		3794.81	12450	19.4155	-155.617	a'a from NE; Younger than ML38B
ML-38C	CRT02-ML38C		3794.81	12450	19.4155	-155.617	a'a from NE; Younger than ML38B
ML-39A	CRT02-ML39A		3791.76	12440	19.4151	-155.618	black phh; Younger than ML39B
ML-55	CRT02-ML55		2706.66	8880	19.3199	-155.694	BULBOUS BLACK PHH; UNDERLIES SHELLY PHH ML 51; Older than ML51
ML-46	CRT02-ML46		3483.91	11430	19.3917	-155.635	rift crack spatter, mauka side of Sulfur Cone; 0
ML-0	CRT04-ML1	spatter	3006.89	9865	19.3573	-155.666	rift crack spatter at Dandelion
Phh: Pahoehoe
†: Samples studied in this contribution

## Sheet: 2-Olivine comp data
Supplementary Data Table_S2: Olivine electron microprobe data
																							Counting statistic errors (1σ)								Run conditions				Olivine Secondary Standard: GeO2 MKII Olivine - Probe for EPMA Interface												Run conditions		Count times (s)
Elevation	Sample	Olivine	Distance	SiO2	Cr2O3	FeO	NiO	MnO	MgO	CaO	Total		Si	Cr	Fe2+	Ni	Mn	Mg	Ca	∑	Fo		Si	Cr	Fe	Ni	Mn	Mg	Ca		Session	Beam current	High voltage		Session	Instution	SiO2	Cr2O3	FeO	NiO	MnO	MgO	CaO	Total		Session	Beam current	High voltage	Si
m			μm	wt%	wt%	wt%	wt%	wt%	wt%	wt%	wt%										mol%		1σ %	1σ %	1σ %	1σ %	1σ %	1σ %	1σ %		Date	nA	kV		Date		wt%	wt%	wt%	wt%	wt%	wt%	wt%	wt%		Date	nA	kV	On (s)
3291.88	ML-22B	Ol-2	0	38.9318	0.0274	19.3185	0.2365	0.2665	41.2778	0.2913	100.35		0.99603	0.000554235	0.41333	0.00486679	0.00577499	1.57432	0.00798484	3.00286	79.2077		0.26	69.75	0.52	8.07	9.17	0.27	2.07		26-04-2013	30	15		19-10-2012	UoL	42.09	0.0108	4.85	0.2096	0.1495	51.75	0.0085	99.0714		19-10-2012	30	15	20
3291.88	ML-22B	Ol-2	4.00035	39.3999	0.0544	16.2637	0.2897	0.2038	44.2661	0.2699	100.747		0.989854	0.00108056	0.341705	0.00585421	0.00433677	1.65789	0.00726502	3.00798	82.9136		0.26	37.23	0.57	6.61	10.94	0.26	2.15		26-04-2013	30	15		19-10-2012	UoL	42.14	0.0113	4.82	0.1996	0.1817	51.8	0.011	99.1681		23-10-2012	30	15	20
3291.88	ML-22B	Ol-2	8.00035	40.0373	0.0784	13.3136	0.3175	0.1744	46.7762	0.2603	100.958		0.989744	0.00153232	0.275238	0.00631314	0.00365166	1.72382	0.00689429	3.00719	86.2335		0.25	27	0.63	6.16	12.68	0.25	2.22		26-04-2013	30	15		19-10-2012	UoL	41.16	0	4.93	0.2232	0.1749	52.18	0.0052	98.6734		02-11-2012	30	15	20
3291.88	ML-22B	Ol-2	12.0003	40.127	0.0628	13.3041	0.3168	0.1939	46.8061	0.2483	101.059		0.990846	0.00122604	0.274732	0.00629215	0.0040554	1.72298	0.00656907	3.0067	86.2496		0.25	29.95	0.63	6.17	11.57	0.25	2.31		26-04-2013	30	15		19-10-2012	UoL	41.38	0.0015	4.92	0.1943	0.1541	52.21	0.0121	98.872		16-11-2012	30	15	20
3291.88	ML-22B	Ol-2	16.0003	40.2863	0.031	13.1232	0.3347	0.2041	46.8459	0.2477	101.073		0.993714	0.000604562	0.270708	0.00664054	0.00426415	1.7226	0.00654617	3.00508	86.421		0.25	68.79	0.64	5.97	11.02	0.25	2.31		26-04-2013	30	15		19-10-2012	UoL	41.33	0.0047	4.88	0.1899	0.1666	52.34	0.0134	98.9247		08-03-2013	30	15	20
3291.88	ML-22B	Ol-2	20.0003	40.2166	0.0736	13.3612	0.3366	0.1539	46.6367	0.2412	101.02		0.993214	0.00143711	0.275955	0.00668645	0.00321931	1.71702	0.00638223	3.00391	86.1555		0.25	27.21	0.63	5.9	14.14	0.25	2.36		26-04-2013	30	15		19-10-2012	UoL	41.77	0.0323	4.81	0.1984	0.1719	52.43	0.0115	99.4242		25-03-2013	30	15	20
3291.88	ML-22B	Ol-2	24.0003	40.3361	0.0613	13.0186	0.3168	0.1894	46.7164	0.2415	100.88		0.995818	0.00119653	0.268785	0.00629093	0.00396052	1.71935	0.00638794	3.00179	86.4824		0.25	33.15	0.64	6.23	11.96	0.25	2.36		26-04-2013	30	15		19-10-2012	UoL	41.62	0.0256	4.86	0.1906	0.2007	52.63	0.0052	99.5322		26-03-2013	30	15	20
3291.88	ML-22B	Ol-2	28.0003	40.2066	0.0517	13.0471	0.3359	0.1741	46.9356	0.2437	100.995		0.992171	0.00100868	0.269252	0.00666719	0.00363893	1.72663	0.00644321	3.00581	86.5115		0.25	39.78	0.64	5.92	12.55	0.25	2.33		26-04-2013	30	15		19-10-2012	UoL	41.62	0	4.8	0.2285	0.1266	52.63	0.014	99.4192		25-04-2013	30	15	20
3291.88	ML-22B	Ol-2	32.0003	40.1867	0.0682	13.1328	0.3479	0.178	46.7164	0.2351	100.865		0.993224	0.00133268	0.271442	0.00691613	0.00372624	1.72125	0.00622551	3.00411	86.38		0.25	29.97	0.64	5.73	12.43	0.25	2.4		26-04-2013	30	15		19-10-2012	UoL	41.77	0	4.79	0.2127	0.1495	51.7	0.0121	98.6344		26-04-2013	30	15	20
3291.88	ML-22B	Ol-2	36.0003	40.0871	0.0744	13.0376	0.3159	0.2029	46.826	0.2316	100.776		0.991431	0.00145481	0.269656	0.00628421	0.00425036	1.72645	0.00613697	3.00566	86.4927		0.25	28.62	0.64	6.33	11.22	0.25	2.44		26-04-2013	30	15		19-10-2012	UoL	41.9	0.0291	4.89	0.2062	0.1721	51.98	0.0108	99.1883		29-04-2013	30	15	20
3291.88	ML-22B	Ol-2	40.0003	40.0274	0.0904	13.247	0.3375	0.1863	46.836	0.2341	100.959		0.989253	0.00176642	0.273793	0.00670916	0.00389986	1.72559	0.00619883	3.00721	86.308		0.25	22.28	0.63	5.88	11.95	0.25	2.4		26-04-2013	30	15		19-10-2012	UoL	41.99	0.0002	4.83	0.1976	0.1392	51.77	0.0139	98.941		30-04-2013	30	15	20
3291.88	ML-22B	Ol-2	44.0003	40.2365	0.0833	13.0852	0.3308	0.2008	46.6965	0.2294	100.862		0.994053	0.00162708	0.270349	0.00657353	0.00420183	1.71982	0.00607212	3.00269	86.4176		0.25	24.53	0.64	5.95	11.21	0.25	2.46		26-04-2013	30	15		Mean (n=11)		41.7064		4.85273	0.2046	0.162436	52.1291	0.0107			14-05-2013	30	15	20
3291.88	ML-22B	Ol-2	48.0003	40.3261	0.0836	13.2089	0.3276	0.2011	46.836	0.2415	101.225		0.993188	0.0016279	0.272061	0.00648982	0.0041951	1.71962	0.00637264	3.00356	86.342		0.25	25.23	0.64	6.07	10.9	0.25	2.34		26-04-2013	30	15		+/- (%)		0.76684		0.984362	6.261	12.9416	0.673678	29.3196			15-05-2013	30	15	20
3291.88	ML-22B	Ol-2	52.0003	39.9875	0.0852	13.1994	0.35	0.1465	47.1049	0.235	101.109		0.986766	0.00166228	0.272395	0.00694707	0.00306206	1.73286	0.0062132	3.00991	86.4178		0.25	24.56	0.64	5.72	15.04	0.25	2.4		26-04-2013	30	15		Accepted values		41.84		4.67	0.19	0.12	53.02				28-01-2014	30	15	20
3291.88	ML-22B	Ol-2	56.0003	40.3062	0.1117	13.247	0.3456	0.1883	46.9655	0.2279	101.392		0.991228	0.00217185	0.272442	0.00683627	0.00392227	1.72182	0.00600487	3.00443	86.3406		0.25	18.66	0.63	5.77	11.93	0.25	2.47		26-04-2013	30	15		Accuracy (%)		0.319399		-3.91279	-7.68421	-35.3636	1.68033				29-01-2014	30	15	20
3291.88	ML-22B	Ol-2	60.0003	40.2664	0.0971	13.1328	0.3429	0.1833	46.6865	0.2356	100.945		0.99406	0.00189524	0.271133	0.00680897	0.00383282	1.71819	0.00623165	3.00215	86.3725		0.25	22	0.64	5.79	12.03	0.25	2.4		26-04-2013	30	15		EMPA software calculated Precision (%)		0.0698936	8.56039	0.132766	2.5473	3.85922	0.141312	0.568298			07-02-2014	30	15	20
3291.88	ML-22B	Ol-2	64.0003	40.0871	0.1336	13.1613	0.3609	0.1594	46.6865	0.2317	100.821		0.991213	0.00261183	0.272156	0.00717783	0.00333838	1.72093	0.00613827	3.00356	86.3469		0.25	15.91	0.64	5.5	13.85	0.25	2.42		26-04-2013	30	15													17-03-2014	30	15	20
3291.88	ML-22B	Ol-2	68.0003	39.9178	0.1645	13.0852	0.3324	0.1748	46.816	0.2331	100.724		0.987908	0.00321878	0.270823	0.0066169	0.00366418	1.72724	0.00618087	3.00565	86.4476		0.25	13.92	0.64	5.99	12.63	0.25	2.4		26-04-2013	30	15		Olivine Secondary Standard: GeO2 MKII Olivine - Probe for EPMA Interface											18-03-2014	30	15	20
3291.88	ML-22B	Ol-2	72.0003	40.0772	0.2553	13.1899	0.3301	0.1738	47.0053	0.2283	101.26		0.986384	0.00496793	0.271485	0.0065349	0.00362314	1.72466	0.00602023	3.00368	86.4014		0.25	9.6	0.64	5.87	12.73	0.25	2.47		26-04-2013	30	15		Session	Instution	SiO2	Cr2O3	FeO	NiO	MnO	MgO	CaO	Total		28-03-2014	30	15	20
3291.88	ML-22B	Ol-2	76.0003	40.107	0.3871	13.1613	0.3621	0.169	46.6467	0.2427	101.076		0.988025	0.00753956	0.271146	0.00717497	0.00352631	1.71308	0.00640582	2.9969	86.3368		0.25	7.21	0.64	5.52	13.09	0.25	2.33		26-04-2013	30	15		Date		wt%	wt%	wt%	wt%	wt%	wt%	wt%	wt%
3291.88	ML-22B	Ol-3	0	39.2505	0.0577	17.1106	0.2256	0.2064	43.509	0.2927	100.653		0.990681	0.00115144	0.36117	0.00458006	0.00441249	1.63711	0.00791533	3.00702	81.9283		0.26	35.24	0.56	8.45	11.47	0.26	2.05		26-04-2013	30	15		23-10-2012	UoL	42.47	0	5.06	0.2179	0.1548	53.53	0.0099
3291.88	ML-22B	Ol-3	6.00836	39.5792	0.0632	14.3128	0.3328	0.2298	45.81	0.2694	100.597		0.9875	0.0012467	0.298642	0.00667879	0.00485631	1.70388	0.00720154	3.01001	85.0887		0.26	31.61	0.61	5.89	10.23	0.25	2.18		26-04-2013	30	15		23-10-2012	UoL	42.5	0.0113	5.16	0.2324	0.1975	53.88	0.0086
3291.88	ML-22B	Ol-3	12.0084	39.7983	0.0549	14.446	0.3073	0.2153	45.4514	0.2766	100.55		0.993151	0.00108318	0.301478	0.00616818	0.00455073	1.69086	0.00739538	3.00468	84.8702		0.26	37.7	0.61	6.4	10.26	0.25	2.11		26-04-2013	30	15		23-10-2012	UoL	42.46	0	5.07	0.2301	0.1534	53.6	0.0139
3291.88	ML-22B	Ol-3	18.0084	39.5991	0.0433	14.446	0.3482	0.2028	45.3717	0.2543	100.265		0.991559	0.000857229	0.302509	0.00701304	0.00430118	1.69366	0.0068224	3.00673	84.8476		0.26	45.13	0.61	5.73	10.93	0.25	2.27		26-04-2013	30	15		23-10-2012	UoL	42.44	0.0107	5.16	0.2256	0.1307	53.54	0.0165
3291.88	ML-22B	Ol-3	24.0084	39.4995	0.0474	14.6744	0.3179	0.2335	45.561	0.2591	100.593		0.987271	0.000936695	0.306734	0.00639115	0.0049433	1.69764	0.00693856	3.01086	84.6989		0.26	41.77	0.6	6.18	9.98	0.25	2.23		26-04-2013	30	15		Session mean (n=2)		42.4675	0.0055	5.1125	0.2265	0.1591	53.6375	0.012225
3291.88	ML-22B	Ol-3	30.0084	39.3501	0.07	14.722	0.3304	0.1846	45.2821	0.2601	100.199		0.987557	0.00138896	0.308986	0.0066696	0.00392404	1.69415	0.00699381	3.00967	84.5769		0.26	29.44	0.6	5.96	12.48	0.25	2.22		26-04-2013	30	15		+/- (%)		0.0588685	115.556	1.07579	2.8217	17.5244	0.306866	29.7296
3291.88	ML-22B	Ol-3	36.0084	39.4198	0.0529	14.9028	0.3131	0.2221	45.3418	0.2479	100.5		0.987176	0.0010474	0.312108	0.00630677	0.00471101	1.69273	0.00665141	3.01073	84.4344		0.26	38.39	0.6	6.36	10.45	0.25	2.3		26-04-2013	30	15		Accepted values		41.84		4.67	0.19	0.12	53.02
3291.88	ML-22B	Ol-3	42.0084	39.4796	0.0603	15.1407	0.3407	0.2137	45.3518	0.262	100.849		0.986319	0.00119107	0.316336	0.00684638	0.00452205	1.68907	0.007013	3.0113	84.228		0.26	33.97	0.59	5.81	10.79	0.25	2.22		26-04-2013	30	15		Accuracy (%)		-1.49976		-9.47537	-19.2105	-32.5833	-1.16465
3291.88	ML-22B	Ol-3	48.0084	39.3999	0.0432	15.1407	0.3071	0.194	45.302	0.2514	100.638		0.986357	0.000855063	0.316987	0.0061839	0.00411364	1.69069	0.00674313	3.01193	84.2134		0.26	46.55	0.59	6.49	11.18	0.25	2.27		26-04-2013	30	15		EMPA software calculated Precision (%)		0.0502013	9.73483	0.122886	1.17255	3.18913	0.0605369	0.452416
3291.88	ML-22B	Ol-3	54.0084	39.5692	0.022	15.2454	0.3386	0.1968	45.053	0.26	100.685		0.990338	0.000435335	0.319096	0.00681643	0.00417193	1.68096	0.00697199	3.00879	84.0478		0.26	96.09	0.59	5.9	11.6	0.25	2.22		26-04-2013	30	15
3291.88	ML-22B	Ol-3	60.0084	39.4896	0.0292	15.2169	0.3538	0.2556	45.053	0.2566	100.655		0.989011	0.000578199	0.318713	0.00712723	0.00542207	1.6821	0.00688546	3.00983	84.0729		0.26	69.28	0.59	5.62	9.01	0.25	2.25		26-04-2013	30	15		Olivine Secondary Standard: GeO2 MKII Olivine - Probe for EPMA Interface
3291.88	ML-22B	Ol-3	66.0084	39.3402	0.0386	15.3596	0.3628	0.2172	45.2123	0.2472	100.778		0.984991	0.000764115	0.321612	0.00730647	0.00460619	1.68757	0.00663135	3.01348	83.995		0.26	49.89	0.59	5.5	10.45	0.25	2.32		26-04-2013	30	15		Session	Instution	SiO2	Cr2O3	FeO	NiO	MnO	MgO	CaO	Total
3291.88	ML-22B	Ol-3	72.0084	39.2605	0.0472	15.3787	0.3566	0.2091	44.9733	0.2456	100.471		0.986039	0.000937251	0.323007	0.00720383	0.00444814	1.68384	0.00660883	3.01209	83.9069		0.26	40.84	0.59	5.55	11.18	0.25	2.33		26-04-2013	30	15		Date		wt%	wt%	wt%	wt%	wt%	wt%	wt%	wt%
3291.88	ML-22B	Ol-3	78.0084	39.4099	0.0362	15.6166	0.3503	0.2232	45.0331	0.2457	100.915		0.986275	0.00071627	0.326839	0.00705143	0.00473122	1.68009	0.00658803	3.01229	83.7166		0.26	53.04	0.58	5.74	10.1	0.25	2.33		26-04-2013	30	15
3291.88	ML-22B	Ol-3	84.0084	39.4696	0.0549	15.607	0.3584	0.2274	45.1327	0.251	101.101		0.985796	0.00108411	0.325987	0.00720006	0.00481061	1.68044	0.00671669	3.01204	83.755		0.26	35.48	0.58	5.67	10.03	0.25	2.28		26-04-2013	30	15		02-11-2012	UoL	41.82	0	4.79	0.2037	0.2114	53.42	0.0138	100.487
3291.88	ML-22B	Ol-3	90.0084	39.4597	0.03	15.7022	0.3585	0.2071	44.5748	0.2537	100.586		0.990776	0.00059555	0.329715	0.00724027	0.00440441	1.66848	0.00682496	3.00803	83.5015		0.26	64.69	0.58	5.63	10.81	0.25	2.26		26-04-2013	30	15		02-11-2012	UoL	41.79	0	4.89	0.1961	0.1641	53.55	0.0095	100.607
3291.88	ML-22B	Ol-3	96.0084	39.2804	0.0441	15.6737	0.3264	0.2491	44.794	0.2492	100.617		0.986382	0.000875555	0.329151	0.0065927	0.0052982	1.67686	0.00670463	3.01187	83.594		0.26	46.07	0.58	6.19	9.33	0.25	2.31		26-04-2013	30	15		02-11-2012	UoL	41.9	0	4.75	0.2227	0.1712	53.69	0.017	100.751
3291.88	ML-22B	Ol-3	102.008	39.3202	0.0534	15.7974	0.324	0.2616	44.7243	0.2428	100.724		0.986744	0.00105951	0.331535	0.00653999	0.00556047	1.67317	0.00652822	3.01114	83.4644		0.26	36.5	0.58	6.03	8.88	0.25	2.36		26-04-2013	30	15		02-11-2012	UoL	41.98	0.0045	4.82	0.1911	0.1422	53.67	0.0111	100.819
3291.88	ML-22B	Ol-3	108.008	39.4298	0.01	15.8164	0.3472	0.2194	44.7442	0.2532	100.82		0.988527	0.000198216	0.33161	0.00700144	0.00465893	1.67228	0.0068012	3.01108	83.4539		0.26	195.67	0.58	5.79	10.6	0.25	2.27		26-04-2013	30	15		02-11-2012	UoL	41.81	0.0069	4.84	0.1867	0.1656	53.6	0.0101	100.625
3291.88	ML-22B	Ol-3	114.008	39.5095	0.0556	15.8925	0.366	0.2203	44.8139	0.2502	101.108		0.987752	0.001099	0.332274	0.0073599	0.00466495	1.6702	0.0067018	3.01005	83.409		0.26	37.17	0.58	5.51	10.36	0.25	2.29		26-04-2013	30	15		Session mean (n=5)		41.86	0.00228	4.818	0.20006	0.1709	53.586	0.0123
3291.88	ML-22B	Ol-3	120.008	39.5095	0.0209	15.8069	0.3435	0.222	44.7641	0.2558	100.923		0.989229	0.00041373	0.330977	0.00691777	0.00470798	1.67084	0.00686205	3.00994	83.4683		0.26	92.55	0.58	5.84	10.28	0.25	2.25		26-04-2013	30	15		+/- (%)		0.18886	141.898	1.09238	7.07015	14.7402	0.202115	25.2098
3291.88	ML-22B	Ol-3	126.008	39.4896	0.0393	15.8545	0.3661	0.2487	44.7442	0.2454	100.988		0.988461	0.000777759	0.331883	0.0073709	0.00527277	1.66964	0.00658126	3.00998	83.4207		0.26	49.2	0.58	5.54	9.16	0.25	2.35		26-04-2013	30	15		Accepted values		41.84		4.67	0.19	0.12	53.02
3291.88	ML-22B	Ol-3	132.008	39.4696	0.0148	15.845	0.3624	0.2302	44.804	0.2382	100.964		0.988229	0.000292976	0.331773	0.00729838	0.00488186	1.67232	0.0063899	3.01119	83.4474		0.26	132.22	0.58	5.44	10.17	0.25	2.38		26-04-2013	30	15		Accuracy (%)		-0.0478011		-3.16916	-5.29474	-42.4167	-1.06752
3291.88	ML-22B	Ol-3	138.008	39.3003	0.0297	15.8259	0.3535	0.2212	44.8637	0.2406	100.835		0.985484	0.000588824	0.331878	0.00712996	0.00469812	1.67709	0.00646408	3.01334	83.4824		0.26	67.92	0.58	5.69	10.09	0.25	2.37		26-04-2013	30	15		EMPA software calculated Precision (%)		0.049078	6.12174	0.136596	2.89954	3.25541	0.0596454	0.338511
3291.88	ML-22B	Ol-3	144.008	39.5991	0.0417	15.8164	0.3402	0.2297	44.535	0.253	100.815		0.992119	0.000826019	0.331392	0.00685578	0.00487445	1.66337	0.00679136	3.00623	83.3891		0.26	47.13	0.58	5.82	9.99	0.26	2.27		26-04-2013	30	15
3291.88	ML-22B	Ol-3	150.008	39.4995	0.0394	15.9687	0.3337	0.2097	44.7143	0.2448	101.01		0.988639	0.000779683	0.33425	0.0067181	0.0044456	1.6684	0.00656471	3.0098	83.3119		0.26	52.09	0.58	6.03	10.89	0.25	2.35		26-04-2013	30	15		Olivine Secondary Standard: GeO2 MKII Olivine - Probe for EPMA Interface
3291.88	ML-22B	Ol-3	156.008	39.4298	0.0584	15.864	0.3309	0.2121	44.6247	0.2511	100.771		0.988806	0.00115791	0.332702	0.00667463	0.00450519	1.66828	0.0067467	3.00888	83.3753		0.26	34.94	0.58	6.01	10.81	0.25	2.28		26-04-2013	30	15		Session	Instution	SiO2	Cr2O3	FeO	NiO	MnO	MgO	CaO	Total
3291.88	ML-22B	Ol-3	162.008	39.3601	0.0512	15.9116	0.3513	0.2172	44.7741	0.2531	100.919		0.986261	0.00101433	0.33343	0.0070804	0.00460979	1.67252	0.00679494	3.01171	83.3801		0.26	40.37	0.58	5.67	10.72	0.25	2.26		26-04-2013	30	15		Date		wt%	wt%	wt%	wt%	wt%	wt%	wt%	wt%
3291.88	ML-22B	Ol-3	168.008	39.4995	0.0075	15.7879	0.3651	0.219	44.7442	0.2354	100.859		0.989626	0.000148565	0.330795	0.00735758	0.00464739	1.67118	0.00631893	3.01008	83.4788		0.26	256.23	0.58	5.48	10.23	0.25	2.41		26-04-2013	30	15		16-11-2012	UoL	42.24	0	4.81	0.2247	0.1786	53.48	0.0099	100.951
3291.88	ML-22B	Ol-3	174.008	39.3302	0.0251	15.9401	0.3336	0.2	44.7043	0.2446	100.778		0.986994	0.000498009	0.334531	0.00673377	0.00425113	1.67243	0.00657662	3.01201	83.3336		0.26	79.76	0.58	5.95	11.49	0.25	2.34		26-04-2013	30	15		16-11-2012	UoL	42.11	0.0043	4.93	0.1946	0.1098	53.63	0.0113	100.99
3291.88	ML-22B	Ol-3	180.008	39.3402	0.0232	15.9306	0.3381	0.2111	44.8338	0.2461	100.923		0.985914	0.000459691	0.33388	0.00681541	0.00448102	1.67501	0.00660803	3.01317	83.3821		0.26	87.92	0.58	5.95	10.94	0.25	2.34		26-04-2013	30	15		16-11-2012	UoL	42.17	0	4.85	0.2011	0.1667	53.61	0.0073	101.011
3291.88	ML-22B	Ol-3	186.008	39.5593	0.0401	15.7974	0.3535	0.2209	44.3956	0.2408	100.607		0.993094	0.000795906	0.331652	0.00713798	0.00469703	1.66146	0.00647674	3.00531	83.3623		0.26	50.76	0.58	5.71	10.36	0.26	2.36		26-04-2013	30	15		16-11-2012	UoL	42.21	0.0126	4.81	0.2031	0.1647	53.51	0.0112	100.933
3291.88	ML-22B	Ol-3	192.008	39.5891	0.0488	15.864	0.3243	0.2065	44.5649	0.2498	100.847		0.991588	0.000966385	0.332295	0.0065335	0.00438088	1.66401	0.00670355	3.00648	83.3567		0.26	40.72	0.58	6.13	11.03	0.25	2.31		26-04-2013	30	15		16-11-2012	UoL	41.93	0	4.77	0.2345	0.1872	53.21	0.0075	100.346
3291.88	ML-22B	Ol-3	198.008	39.5692	0.0522	15.9591	0.3366	0.1828	44.5848	0.2531	100.938		0.99065	0.00103326	0.33414	0.00677829	0.00387636	1.66402	0.0067891	3.00728	83.2798		0.26	39.22	0.58	5.9	12.36	0.26	2.26		26-04-2013	30	15		16-11-2012	UoL	42.06	0.0118	4.86	0.2345	0.1312	53.39	0.0081	100.701
3291.88	ML-22B	Ol-3	204.008	39.4995	0.0605	15.883	0.3396	0.256	44.7541	0.2541	101.047		0.988072	0.00119654	0.332266	0.00683296	0.00542404	1.66893	0.00681019	3.00953	83.3988		0.26	33.53	0.58	5.93	9.14	0.25	2.26		26-04-2013	30	15		16-11-2012	UoL	42.26	0.0198	4.84	0.2065	0.1328	53.33	0.0079	100.797
3291.88	ML-22B	Ol-3	210.008	39.5891	0.0432	15.8545	0.372	0.195	44.794	0.2481	101.096		0.989438	0.000853633	0.331375	0.00747823	0.00412793	1.66894	0.0066435	3.00886	83.436		0.26	45.73	0.58	5.35	11.72	0.25	2.31		26-04-2013	30	15		16-11-2012	UoL	42.12	0.0015	4.89	0.1965	0.1229	53.54	0.0142	100.885
3291.88	ML-22B	Ol-3	216.008	39.4597	0.0372	15.7974	0.3628	0.2251	44.6047	0.2422	100.729		0.989859	0.000737799	0.331406	0.00732033	0.00478279	1.66805	0.00650956	3.00867	83.4274		0.26	53.78	0.58	5.51	10.02	0.25	2.36		26-04-2013	30	15		Mean (n=8)		42.1375	0.00625	4.845	0.211938	0.149237	53.4625	0.009675
3291.88	ML-22B	Ol-3	222.008	39.4597	0.0282	15.902	0.3669	0.2342	44.7243	0.2474	100.963		0.988241	0.000558385	0.333057	0.00739097	0.00496801	1.66979	0.00663845	3.01064	83.373		0.26	70.11	0.58	5.49	9.78	0.25	2.31		26-04-2013	30	15		+/- (%)		0.256777	120.688	1.03494	7.86516	19.1073	0.26916	25.1651
3291.88	ML-22B	Ol-3	228.008	39.38	0.0506	15.902	0.3559	0.2191	44.6745	0.244	100.826		0.987518	0.00100322	0.333487	0.00717862	0.00465369	1.67008	0.00655567	3.01048	83.3576		0.26	39.77	0.58	5.66	10.68	0.25	2.34		26-04-2013	30	15		Accepted values		41.84		4.67	0.19	0.12	53.02
3291.88	ML-22B	Ol-3	234.008	39.3402	0.0497	15.9687	0.3235	0.1859	44.6944	0.2473	100.81		0.98681	0.000985665	0.334983	0.00652703	0.00394969	1.67132	0.00664629	3.01122	83.3057		0.26	40.53	0.58	6.14	12.21	0.25	2.31		26-04-2013	30	15		Accuracy (%)		-0.711042		-3.74732	-11.5461	-24.3646	-0.834591
3291.88	ML-22B	Ol-3	240.008	39.5393	0.0331	15.9496	0.3423	0.219	44.5748	0.2501	100.908		0.990496	0.000655581	0.334141	0.00689722	0.00464679	1.66464	0.00671266	3.00819	83.285		0.26	60.83	0.58	5.77	10.48	0.25	2.3		26-04-2013	30	15		EMPA software calculated Precision (%)		0.05	10.5937	0.1276	1.39674	3.31903	0.0561143	0.416286
3291.88	ML-22B	Ol-3	246.008	39.4298	0.0272	15.8354	0.3537	0.2347	44.5748	0.2464	100.702		0.989673	0.000539774	0.332394	0.00714079	0.0049896	1.66788	0.00662622	3.00925	83.3848		0.26	71.74	0.58	5.69	9.87	0.25	2.32		26-04-2013	30	15
3291.88	ML-22B	Ol-3	252.008	39.7585	0.0272	15.902	0.3759	0.1959	44.804	0.244	101.307		0.991471	0.000536284	0.331634	0.00753992	0.00413781	1.66562	0.00651926	3.00746	83.3977		0.26	74.26	0.58	5.3	11.59	0.25	2.35		26-04-2013	30	15		Olivine Secondary Standard: GeO2 MKII Olivine - Probe for EPMA Interface
3291.88	ML-22B	Ol-3	258.008	39.4796	0.0524	16.0353	0.3264	0.2245	44.6745	0.2469	101.04		0.988164	0.00103696	0.335652	0.00657129	0.00475947	1.66696	0.00662118	3.00976	83.2415		0.26	37.22	0.57	6.13	10.21	0.25	2.32		26-04-2013	30	15		Session	Instution	SiO2	Cr2O3	FeO	NiO	MnO	MgO	CaO	Total
3291.88	ML-22B	Ol-3	264.008	39.5692	0.0338	15.9211	0.3511	0.2227	44.6346	0.2389	100.971		0.99047	0.000668922	0.333282	0.007069	0.0047216	1.66557	0.00640704	3.00819	83.3286		0.26	58.5	0.58	5.69	10.46	0.25	2.39		26-04-2013	30	15		Date		wt%	wt%	wt%	wt%	wt%	wt%	wt%	wt%
3291.88	ML-22B	Ol-3	270.008	39.6389	0.033	16.0448	0.3533	0.2543	44.7641	0.247	101.335		0.989297	0.00065117	0.334885	0.00709239	0.00537572	1.66549	0.0066048	3.0094	83.2612		0.26	60.37	0.57	5.68	9.2	0.25	2.31		26-04-2013	30	15		08-03-2013	UoL	42.03	0.0197	4.81	0.2321	0.1516	52.81	0.0128	100.066
3291.88	ML-22B	Ol-3	276.008	39.629	0.0367	15.8069	0.3186	0.2556	44.5051	0.243	100.795		0.992935	0.000727025	0.331215	0.00642092	0.00542443	1.66237	0.00652337	3.00561	83.3881		0.26	54.42	0.58	6.21	9.07	0.25	2.37		26-04-2013	30	15		08-03-2013	UoL	41.89	0.0093	4.89	0.2253	0.1392	52.84	0.017	100.011
3291.88	ML-22B	Ol-3	282.008	39.4796	0.0486	15.8925	0.3481	0.2252	44.5948	0.2512	100.84		0.989555	0.000963116	0.333132	0.00701803	0.00478103	1.66632	0.00674597	3.00852	83.3411		0.26	41.48	0.58	5.68	10.16	0.25	2.28		26-04-2013	30	15		08-03-2013	UoL	41.75	0.0001	4.91	0.1993	0.1599	52.61	0.0121	99.6415
3291.88	ML-22B	Ol-3	288.008	39.4298	0.0355	15.8925	0.3292	0.2351	44.7541	0.2499	100.926		0.987695	0.000703076	0.332926	0.00663288	0.00498812	1.67125	0.00670691	3.0109	83.3906		0.26	55.73	0.58	6.1	10.11	0.25	2.29		26-04-2013	30	15		08-03-2013	UoL	41.37		4.76	0.2132	0.1092	51.9	0.0218	98.3892
3291.88	ML-22B	Ol-3	294.008	39.7286	0.0344	15.902	0.3393	0.2176	44.6944	0.2546	101.171		0.991998	0.000679112	0.33206	0.00681453	0.00460206	1.66368	0.0068112	3.00664	83.3637		0.26	57.11	0.58	5.88	10.51	0.25	2.26		26-04-2013	30	15		08-03-2013	UoL	41.05		4.77	0.1917	0.1545	51.94	0.0072	98.1245
3291.88	ML-22B	Ol-3	300.008	39.5194	0.0434	15.864	0.324	0.201	44.535	0.2434	100.73		0.991136	0.000860573	0.332729	0.00653599	0.00426977	1.66507	0.00654035	3.00714	83.3474		0.26	45.75	0.58	6.15	11.37	0.26	2.36		26-04-2013	30	15		08-03-2013	UoL	41.17		4.79	0.2238	0.1785	51.98	0.0062	98.3552
3291.88	ML-22B	Ol-3	306.008	39.4995	0.0305	15.9877	0.3306	0.2299	44.6446	0.2447	100.967		0.989225	0.000603919	0.334846	0.00665963	0.00487672	1.66679	0.00656591	3.00957	83.2736		0.26	65.7	0.58	6.04	9.94	0.25	2.33		26-04-2013	30	15		Session mean (n=5)		41.5433	0.0097	4.82167	0.214233	0.148817	52.3467	0.01285
3291.88	ML-22B	Ol-3	312.008	39.5493	0.0255	15.8069	0.3408	0.2393	44.6745	0.246	100.882		0.990481	0.00050492	0.331062	0.00686516	0.00507616	1.66792	0.00660085	3.00851	83.4407		0.26	77.19	0.58	5.8	9.62	0.25	2.33		26-04-2013	30	15		+/- (%)		0.970363	101.094	1.31442	7.4247	15.6323	0.865675	45.9124
																																			Accepted values		41.84		4.67	0.19	0.12	53.02
3291.88	ML-22B	Ol-13	0	38.7725	0.0754	18.167	0.205	0.2607	42.5727	0.304	100.357		0.987243	0.00151792	0.386847	0.00419854	0.00562248	1.616	0.00829339	3.00972	80.6876		0.26	26.99	0.54	9.23	8.97	0.26	1.98		26-04-2013	30	15		Accuracy (%)		0.70905		-3.24768	-12.7544	-24.0139	1.26996
3291.88	ML-22B	Ol-13	5	39.4696	0.0462	16.1971	0.2849	0.2412	44.1067	0.2746	100.62		0.992481	0.000918495	0.340606	0.0057623	0.00513715	1.65338	0.00739805	3.00568	82.9206		0.26	40.75	0.57	6.86	9.81	0.26	2.15		26-04-2013	30	15		EMPA software calculated Precision (%)		0.250174	48.4767	0.613268	6.49935	11.3439	0.252919	2.32281
3291.88	ML-22B	Ol-13	10	39.4497	0.0602	16.178	0.2867	0.2183	44.037	0.2606	100.491		0.992976	0.00119803	0.340547	0.00580452	0.00465409	1.65242	0.00702792	3.00463	82.9148		0.26	33.18	0.57	6.82	10.85	0.26	2.24		26-04-2013	30	15
3291.88	ML-22B	Ol-13	15	39.5194	0.024	16.3398	0.3032	0.2251	44.1266	0.2606	100.799		0.992597	0.000476595	0.343214	0.00612542	0.00478877	1.65223	0.00701285	3.00645	82.8024		0.26	81.04	0.57	6.45	10.4	0.26	2.23		26-04-2013	30	15		Olivine Secondary Standard: GeO2 MKII Olivine - Probe for EPMA Interface
3291.88	ML-22B	Ol-13	20	39.5095	0.0193	16.473	0.3042	0.2638	44.3059	0.2592	101.135		0.989987	0.00038235	0.34519	0.006131	0.00559872	1.655	0.00695858	3.00925	82.7444		0.26	100.81	0.57	6.44	8.96	0.26	2.24		26-04-2013	30	15		Session	Instution	SiO2	Cr2O3	FeO	NiO	MnO	MgO	CaO	Total
3291.88	ML-22B	Ol-13	25	39.4298	0.0446	16.3398	0.3302	0.2043	44.4055	0.2522	101.006		0.988605	0.000884115	0.342611	0.00665916	0.00433863	1.65975	0.00677487	3.00963	82.8919		0.26	43.25	0.57	5.95	11.05	0.26	2.29		26-04-2013	30	15		Date		wt%	wt%	wt%	wt%	wt%	wt%	wt%	wt%
3291.88	ML-22B	Ol-13	30	39.6091	0.0501	16.2542	0.3058	0.2241	44.2661	0.2535	100.963		0.992536	0.000992578	0.340622	0.00616358	0.00475641	1.6536	0.00680593	3.00548	82.9218		0.26	41.29	0.57	6.43	10.21	0.26	2.27		26-04-2013	30	15		25-03-2013	UoL	41.25	0	4.86	0.1915	0.1342	52.59	0.012	99.0377
3291.88	ML-22B	Ol-13	35	39.4597	0.0246	16.2066	0.3023	0.2141	44.1565	0.2519	100.616		0.99237	0.000489137	0.340853	0.00611508	0.0045606	1.65548	0.00678744	3.00665	82.9283		0.26	78.49	0.57	6.42	10.61	0.26	2.29		26-04-2013	30	15		25-03-2013	UoL	41.1	0.0095	4.99	0.2171	0.1427	52.65	0.0138	99.1231
3291.88	ML-22B	Ol-13	40	39.4198	0.021	16.3398	0.3042	0.1993	44.1764	0.2465	100.707		0.991143	0.000417461	0.343577	0.00615212	0.00424438	1.65585	0.00664043	3.00802	82.8185		0.26	89.74	0.57	6.39	11.28	0.26	2.33		26-04-2013	30	15		25-03-2013	UoL	40.91	0.0027	4.89	0.2018	0.1459	52.64	0.0168	98.8072
3291.88	ML-22B	Ol-13	45	39.2904	0.0147	16.2827	0.3162	0.2526	44.0868	0.2509	100.494		0.990351	0.000292952	0.34323	0.00641075	0.0053929	1.65661	0.00677581	3.00906	82.8394		0.26	134.42	0.57	6.19	9.2	0.26	2.29		26-04-2013	30	15		25-03-2013	UoL	41.16	0.0178	4.91	0.2103	0.1745	52.82	0.0086	99.3012
3291.88	ML-22B	Ol-13	50	39.5194	0.07	16.3493	0.2987	0.2211	44.017	0.2511	100.727		0.992993	0.00139062	0.343551	0.00603691	0.00470555	1.64879	0.00675989	3.00423	82.7587		0.26	27.85	0.57	6.55	10.3	0.26	2.29		26-04-2013	30	15		25-03-2013	UoL	41.15	0.0221	4.85	0.2077	0.1472	52.89	0.017	99.284
3291.88	ML-22B	Ol-13	55	39.4497	0.0501	16.2637	0.3062	0.1917	44.0569	0.2475	100.566		0.992623	0.000996675	0.342228	0.00619712	0.00408553	1.65258	0.00667227	3.00538	82.8463		0.26	38	0.57	6.39	12.02	0.26	2.33		26-04-2013	30	15		25-03-2013	UoL	40.9	0.0007	4.89	0.2195	0.1499	52.48	0.0054	98.6455
3291.88	ML-22B	Ol-13	60	39.3601	0.0225	16.3493	0.3135	0.2362	44.1266	0.2582	100.666		0.990456	0.000447648	0.344061	0.00634542	0.00503437	1.65534	0.00696134	3.00865	82.7941		0.26	88.14	0.57	6.26	9.46	0.26	2.23		26-04-2013	30	15		25-03-2013	UoL	40.97	0.0155	4.91	0.2026	0.16	52.55	0.0121	98.8202
3291.88	ML-22B	Ol-13	65	39.5194	0.0344	16.3208	0.2969	0.2442	44.1266	0.244	100.786		0.992584	0.00068311	0.34281	0.00599806	0.00519503	1.65221	0.00656605	3.00605	82.819		0.26	58.22	0.57	6.61	9.33	0.26	2.34		26-04-2013	30	15		25-03-2013	UoL	40.84	0	4.92	0.1877	0.1784	52.45	0.0064	98.5825
3291.88	ML-22B	Ol-13	70	39.5692	0.0271	16.2542	0.3037	0.2309	44.0668	0.2516	100.704		0.994211	0.000538351	0.34154	0.00613776	0.00491395	1.6506	0.00677313	3.00471	82.8579		0.26	73.45	0.57	6.44	10.02	0.26	2.28		26-04-2013	30	15		25-03-2013	UoL	40.97	0.0073	4.81	0.2017	0.1221	52.78	0.0106	98.9017
3291.88	ML-22B	Ol-13	75	39.5393	0.0349	16.3589	0.321	0.2261	44.2959	0.2438	101.02		0.991037	0.00069161	0.342901	0.00647156	0.00480006	1.65513	0.00654714	3.00758	82.8403		0.26	56.77	0.57	6.07	10	0.26	2.33		26-04-2013	30	15		25-03-2013	UoL	41.06	0.0241	4.94	0.1946	0.1174	52.58	0.0083	98.9244
3291.88	ML-22B	Ol-13	80	39.3103	0.0526	16.1114	0.2836	0.2036	43.509	0.2508	99.7213		0.996774	0.00105451	0.341649	0.00578416	0.00437274	1.64467	0.00681359	3.00112	82.8021		0.26	37.1	0.57	6.82	11.39	0.26	2.3		26-04-2013	30	15		25-03-2013	UoL	41.06	0.0132	4.9	0.2086	0.155	52.61	0.0132	98.96
3291.88	ML-22B	Ol-13	85	39.4995	0.0443	16.3303	0.2966	0.2206	44.0967	0.25	100.738		0.9925	0.000880072	0.343154	0.00599451	0.00469494	1.65179	0.00673033	3.00574	82.8011		0.26	43.88	0.57	6.6	10.4	0.26	2.29		26-04-2013	30	15		25-03-2013	UoL	41.19	0	4.96	0.1864	0.1378	52.74	0.0111	99.2253
3291.88	ML-22B	Ol-13	90	39.3999	0.0326	16.3493	0.2949	0.2438	43.9772	0.2612	100.559		0.992235	0.000649101	0.34433	0.00597362	0.00520042	1.65103	0.00704774	3.00647	82.7457		0.26	60.27	0.57	6.65	9.42	0.26	2.21		26-04-2013	30	15		25-03-2013	UoL	41.26	0.0096	5.01	0.1944	0.1546	52.76	0.0097	99.3983
3291.88	ML-22B	Ol-13	95	39.3999	0.057	16.3208	0.3369	0.2174	44.0569	0.2498	100.639		0.991286	0.00113385	0.3434	0.00681787	0.00463286	1.65244	0.0067337	3.00645	82.7965		0.26	34.97	0.57	5.86	10.71	0.26	2.29		26-04-2013	30	15		25-03-2013	UoL	41.2	0	4.98	0.1746	0.1472	52.54	0.0132	99.055
3291.88	ML-22B	Ol-13	100	39.629	0.0254	16.3874	0.2963	0.2209	44.3358	0.2593	101.154		0.991839	0.000502617	0.343	0.00596491	0.00468285	1.65421	0.00695326	3.00716	82.8283		0.26	78.46	0.57	6.6	10.49	0.26	2.22		26-04-2013	30	15		25-03-2013	UoL	41.37	0.0058	5.03	0.1871	0.1539	52.6	0.0192	99.366
3291.88	ML-22B	Ol-13	105	39.5393	0.0683	16.2447	0.2956	0.224	44.1166	0.2551	100.744		0.992864	0.00135599	0.341135	0.00597047	0.00476424	1.65147	0.00686322	3.00442	82.8822		0.26	29.4	0.57	6.55	10.29	0.26	2.25		26-04-2013	30	15		25-03-2013	UoL	41.21	0.017	4.95	0.2115	0.149	52.56	0.0175	99.115
3291.88	ML-22B	Ol-13	110	39.619	0.0368	16.3113	0.3119	0.2321	44.1366	0.2635	100.911		0.993623	0.000729695	0.342107	0.00629183	0.00493036	1.65016	0.00708037	3.00492	82.8305		0.26	53.36	0.57	6.3	9.74	0.26	2.2		26-04-2013	30	15		25-03-2013	UoL	41.12	0.0056	4.92	0.2114	0.1468	52.61	0.0012	99.015
3291.88	ML-22B	Ol-13	115	39.6788	0.0326	16.2637	0.3112	0.2105	44.0668	0.2589	100.823		0.995483	0.000646649	0.341233	0.00627999	0.00447315	1.64815	0.0069593	3.00322	82.8496		0.26	57.96	0.57	6.29	11.06	0.26	2.23		26-04-2013	30	15		25-03-2013	UoL	41.16	0	4.94	0.2101	0.1346	52.58	0.0115	99.0362
3291.88	ML-22B	Ol-13	120	39.7186	0.0444	16.5016	0.2722	0.2294	44.1465	0.2531	101.166		0.993965	0.000878487	0.34535	0.0054791	0.00486246	1.64696	0.0067862	3.00428	82.6681		0.26	42.21	0.57	7.1	9.81	0.26	2.27		26-04-2013	30	15		25-03-2013	UoL	41.22	0.0328	4.88	0.1936	0.1514	52.67	0.012	99.1598
3291.88	ML-22B	Ol-13	125	39.5493	0.0334	17.2058	0.2645	0.2498	43.2899	0.2748	100.868		0.996075	0.000665082	0.362397	0.00535825	0.00532882	1.62536	0.00741528	3.00259	81.7709		0.26	58.95	0.55	7.21	9.11	0.26	2.14		26-04-2013	30	15		25-03-2013	UoL	41.13	0	4.99	0.2169	0.1404	52.53	0.0071	99.0144
3291.88	ML-22B	Ol-13	130	39.4896	0.0521	18.3002	0.1989	0.226	43.8377	0.3002	102.405		0.984583	0.00102703	0.381577	0.00398886	0.0047727	1.6294	0.00801933	3.01336	81.0277		0.26	37.26	0.54	9.43	10.14	0.26	1.99		26-04-2013	30	15		25-03-2013	UoL	41.15	0.0081	4.95	0.1967	0.1332	52.62	0.0119	99.0699
3291.88	ML-22B	Ol-13	135	38.9916	0.0128	19.4232	0.1861	0.2391	41.6364	0.3328	100.822		0.99319	0.000257779	0.41375	0.00381287	0.00515854	1.58104	0.00908245	3.00629	79.2611		0.26	150.72	0.52	10.1	9.77	0.27	1.85		26-04-2013	30	15		Session mean (n=21)		41.1133	0.00913333	4.92762	0.201229	0.146486	52.631	0.0113619
																																			+/- (%)		0.32454	103.515	1.12242	5.95867	9.96196	0.212421	38.2048
3291.88	ML-22B	Ol-12	0	38.8521	0.076	18.0528	0.2172	0.2265	42.9213	0.2902	100.636		0.985814	0.00152465	0.383072	0.00443286	0.00486781	1.62354	0.00788924	3.01114	80.9095		0.26	26.66	0.54	8.67	10.55	0.26	2.06		26-04-2013	30	15		Accepted values		41.84		4.67	0.19	0.12	53.02
3291.88	ML-22B	Ol-12	8.00717	39.9776	0.0797	13.2279	0.3477	0.1872	46.7662	0.2625	100.849		0.989278	0.00155932	0.273747	0.00692071	0.00392368	1.72521	0.00695968	3.0076	86.3055		0.25	24.81	0.63	5.66	12.1	0.25	2.2		26-04-2013	30	15		Accuracy (%)		1.73678		-5.51647	-5.90977	-22.0714	0.733775
3291.88	ML-22B	Ol-12	16.0072	39.7485	0.0599	13.3707	0.3217	0.1925	46.8957	0.2463	100.835		0.98499	0.00117358	0.27709	0.00641218	0.00404043	1.73242	0.00653933	3.01266	86.2111		0.26	34.45	0.63	6.12	11.35	0.25	2.32		26-04-2013	30	15		EMPA software calculated Precision (%)		0.254541	44.8551	0.608507	6.6309	11.4793	0.252659	2.31418
3291.88	ML-22B	Ol-12	24.0072	39.8979	0.0693	13.4373	0.3	0.1943	46.9455	0.2461	101.09		0.986035	0.0013541	0.277722	0.00596359	0.00406725	1.7296	0.00651646	3.01126	86.1646		0.25	29.48	0.63	6.53	11.79	0.25	2.33		26-04-2013	30	15
3291.88	ML-22B	Ol-12	32.0072	39.878	0.0634	13.6942	0.3082	0.1866	46.4774	0.2502	100.858		0.988795	0.00124291	0.283966	0.00614681	0.00391896	1.718	0.00664689	3.00872	85.8156		0.25	31.77	0.62	6.41	11.9	0.25	2.28		26-04-2013	30	15		Olivine Secondary Standard: GeO2 MKII Olivine - Probe for EPMA Interface
3291.88	ML-22B	Ol-12	40.0072	39.8979	0.0685	13.7228	0.3398	0.1914	46.1586	0.2516	100.631		0.991554	0.00134596	0.28521	0.00679256	0.00402897	1.71012	0.00669938	3.00575	85.7062		0.25	29.39	0.62	5.78	11.74	0.25	2.27		26-04-2013	30	15		Session	Instution	SiO2	Cr2O3	FeO	NiO	MnO	MgO	CaO	Total
3291.88	ML-22B	Ol-12	48.0072	40.0274	0.0585	13.9797	0.3202	0.2047	46.1586	0.2488	100.998		0.992043	0.00114632	0.289753	0.00638321	0.00429712	1.70543	0.00660666	3.00566	85.4774		0.25	35.71	0.62	6.11	11.16	0.25	2.3		26-04-2013	30	15		Date		wt%	wt%	wt%	wt%	wt%	wt%	wt%	wt%
3291.88	ML-22B	Ol-12	56.0072	39.9975	0.0643	14.0559	0.3139	0.1861	46.0291	0.2518	100.899		0.99249	0.00126148	0.29168	0.00626511	0.00391134	1.70269	0.00669432	3.00499	85.3748		0.25	31.4	0.62	6.31	12.08	0.25	2.29		26-04-2013	30	15		26-03-2013	UoL	42.34	0	5.21	0.2237	0.1484	53.31	0.0101	101.242
3291.88	ML-22B	Ol-12	64.0072	39.9975	0.0414	14.3318	0.3177	0.1822	46.0789	0.2502	101.2		0.99096	0.00081096	0.296949	0.00633118	0.00382347	1.7019	0.00664153	3.00742	85.144		0.25	47.73	0.61	6.18	12.15	0.25	2.29		26-04-2013	30	15		26-03-2013	UoL	42.2	0	5.32	0.2124	0.1483	53.27	0.01	101.161
3291.88	ML-22B	Ol-12	72.0072	41.7205	0.0609	14.3889	0.3165	0.1765	45.5112	0.2445	102.419		1.01676	0.00117344	0.293261	0.00620421	0.00364334	1.65347	0.00638419	2.98089	84.9357		0.25	33.1	0.61	6.21	12.87	0.25	2.33		26-04-2013	30	15		26-03-2013	UoL	42.19	0.0025	5.18	0.2203	0.154	53.2	0.0089	100.956
3291.88	ML-22B	Ol-12	80.0072	39.7784	0.0688	14.4175	0.3152	0.2206	45.8897	0.2492	100.939		0.988927	0.00135232	0.299752	0.006303	0.00464524	1.70075	0.00663778	3.00837	85.0162		0.25	28.66	0.61	6.24	9.96	0.25	2.29		26-04-2013	30	15		26-03-2013	UoL	42.35	0.0152	5.23	0.2186	0.172	53.67	0.008	101.664
3291.88	ML-22B	Ol-12	88.0072	39.7385	0.0483	14.4365	0.3442	0.1818	45.9494	0.2497	100.949		0.988135	0.00094957	0.300208	0.00688429	0.00382899	1.70331	0.00665243	3.00997	85.0159		0.26	40.51	0.61	5.79	11.83	0.25	2.29		26-04-2013	30	15		26-03-2013	UoL	42.49	0	5.29	0.213	0.1463	53.73	0.0104	101.88
3291.88	ML-22B	Ol-12	96.0072	39.7983	0.0119	14.4746	0.3289	0.2169	45.6108	0.2471	100.688		0.992244	0.000234572	0.301798	0.00659571	0.00458036	1.69523	0.00660061	3.00729	84.8877		0.25	173.57	0.61	5.96	10.39	0.25	2.31		26-04-2013	30	15		26-03-2013	UoL	42.26	0.0072	5.25	0.1982	0.1399	53.48	0.0145	101.35
3291.88	ML-22B	Ol-12	104.007	39.7087	0.061	14.6268	0.3517	0.1978	45.7602	0.254	100.96		0.988181	0.00120021	0.304409	0.00703991	0.0041693	1.69765	0.0067724	3.00942	84.7952		0.26	33.27	0.6	5.55	11.38	0.25	2.26		26-04-2013	30	15		Session mean (n=6)		42.305	0.00415	5.24667	0.214367	0.151483	53.4433	0.0103167
3291.88	ML-22B	Ol-12	112.007	39.7883	0.0718	14.7125	0.3246	0.2166	45.9494	0.2489	101.312		0.986925	0.00140808	0.30519	0.00647621	0.00455064	1.69909	0.00661471	3.01026	84.7731		0.25	27.02	0.6	6.07	10.47	0.25	2.29		26-04-2013	30	15		+/- (%)		0.266909	146.887	0.98424	4.21049	7.2792	0.411594	21.6866
3291.88	ML-22B	Ol-12	120.007	39.9676	0.0559	14.7791	0.3237	0.1968	45.6606	0.2413	101.225		0.991862	0.00109681	0.306724	0.00646145	0.0041367	1.68925	0.00641591	3.00594	84.6329		0.25	34.59	0.6	6.07	11.17	0.25	2.36		26-04-2013	30	15		Accepted values		41.84		4.67	0.19	0.12	53.02
3291.88	ML-22B	Ol-12	128.007	39.9377	0.0571	14.6935	0.3227	0.2063	45.4414	0.2486	100.907		0.993835	0.00112342	0.305781	0.00645912	0.00434826	1.68574	0.00662811	3.00392	84.6459		0.25	37.19	0.6	6.07	10.8	0.25	2.31		26-04-2013	30	15		Accuracy (%)		-1.11138		-12.3483	-12.8246	-26.2361	-0.798441
3291.88	ML-22B	Ol-12	136.007	39.9577	0.0345	14.7981	0.3669	0.2003	45.6108	0.2486	101.217		0.992129	0.000677271	0.307278	0.00732757	0.00421245	1.68828	0.00661343	3.00652	84.6019		0.25	58.98	0.6	5.42	11.43	0.25	2.31		26-04-2013	30	15		EMPA software calculated Precision (%)		0.253279	105.816	0.577287	6.78194	10.563	0.258907	2.33032
3291.88	ML-22B	Ol-12	144.007	39.8879	0.035	14.9694	0.3508	0.2263	45.5709	0.2498	101.29		0.990669	0.000687275	0.31092	0.00700794	0.00476055	1.68727	0.00664717	3.00796	84.4399		0.25	58.29	0.6	5.69	10.16	0.25	2.3		26-04-2013	30	15
3291.88	ML-22B	Ol-12	152.007	39.6489	0.0394	14.741	0.3126	0.1908	45.4414	0.2524	100.627		0.990326	0.00077807	0.307915	0.00628029	0.00403656	1.69203	0.00675451	3.00812	84.6038		0.26	49.97	0.6	6.24	11.94	0.25	2.26		26-04-2013	30	15		Olivine Secondary Standard: GeO2 MKII Olivine - Probe for EPMA Interface
3291.88	ML-22B	Ol-12	160.007	39.7684	0.0414	14.7696	0.3018	0.1888	45.4414	0.2381	100.75		0.991812	0.000816332	0.308046	0.00605417	0.00398822	1.68948	0.00636221	3.00655	84.5786		0.26	47.17	0.6	6.56	11.96	0.25	2.4		26-04-2013	30	15		Session	Instution	SiO2	Cr2O3	FeO	NiO	MnO	MgO	CaO	Total
3291.88	ML-22B	Ol-12	168.007	39.7385	0.0263	14.9028	0.3211	0.2222	45.6307	0.2493	101.091		0.988886	0.000517446	0.310141	0.00642715	0.00468343	1.69278	0.00664682	3.01008	84.5156		0.26	77.28	0.6	6.13	10.19	0.25	2.31		26-04-2013	30	15		Date		wt%	wt%	wt%	wt%	wt%	wt%	wt%	wt%
3291.88	ML-22B	Ol-12	176.007	39.7883	0.0445	14.9409	0.3214	0.2131	45.4414	0.2507	101		0.990825	0.000876146	0.311153	0.0064377	0.0044948	1.68695	0.00668888	3.00742	84.4276		0.25	43.07	0.59	6.21	10.71	0.25	2.29		26-04-2013	30	15		25-04-2013	UoL	41.16	0	4.93	0.2232	0.1749	52.18	0.0052	98.6733
3291.88	ML-22B	Ol-12	184.007	39.7385	0.0759	14.8838	0.3189	0.2171	45.302	0.2394	100.776		0.991384	0.00149709	0.310527	0.00639924	0.00458749	1.68483	0.00639899	3.00562	84.4375		0.25	26.39	0.6	6.19	10.63	0.25	2.37		26-04-2013	30	15		25-04-2013	UoL	41.38	0.0015	4.92	0.1943	0.1541	52.21	0.0121	98.872
3291.88	ML-22B	Ol-12	192.007	39.6489	0.0615	14.8267	0.3126	0.2094	45.1426	0.2445	100.446		0.992272	0.00121689	0.310313	0.00629263	0.00443876	1.6842	0.00655596	3.00529	84.4417		0.25	32.07	0.6	6.3	10.88	0.25	2.33		26-04-2013	30	15		25-04-2013	UoL	41.33	0.0047	4.88	0.1899	0.1666	52.34	0.0134	98.9246
3291.88	ML-22B	Ol-12	200.007	39.6987	0.0496	14.9314	0.33	0.1912	45.1924	0.2451	100.638		0.992076	0.000979999	0.31205	0.00663325	0.00404708	1.68362	0.0065625	3.00596	84.3636		0.25	38.93	0.59	5.93	11.68	0.25	2.31		26-04-2013	30	15		25-04-2013	UoL	41.77	0.0323	4.81	0.1984	0.1719	52.43	0.0115	99.4241
3291.88	ML-22B	Ol-12	208.007	39.5792	0.0498	14.9123	0.3442	0.201	45.3817	0.2482	100.716		0.988776	0.000983639	0.311554	0.00691649	0.00425317	1.69013	0.0066434	3.00926	84.4354		0.25	39.81	0.59	5.7	11.34	0.25	2.3		26-04-2013	30	15		25-04-2013	UoL	41.62	0.0256	4.86	0.1906	0.2007	52.63	0.0052	99.5321
3291.88	ML-22B	Ol-12	216.007	39.3501	0.0519	14.6268	0.2965	0.2248	44.9235	0.2535	99.7271		0.991647	0.00103408	0.30826	0.00601007	0.00479836	1.68769	0.00684458	3.00629	84.5557		0.26	37.66	0.6	6.54	10.11	0.25	2.24		26-04-2013	30	15		25-04-2013	UoL	41.62	0	4.8	0.2285	0.1266	52.63	0.014	99.4191
3291.88	ML-22B	Ol-12	224.007	39.3899	0.0362	14.9219	0.3283	0.1946	44.9135	0.2435	100.028		0.991005	0.000720069	0.313956	0.00664363	0.00414686	1.68452	0.00656367	3.00755	84.2902		0.25	53.61	0.59	5.94	11.31	0.25	2.33		26-04-2013	30	15		25-04-2013	UoL	41.77	0	4.79	0.2127	0.1495	51.7	0.0121	98.6343
																																			25-04-2013	UoL	41.9	0.0291	4.89	0.2062	0.1721	51.98	0.0108	99.1882
3291.88	ML-22B	Ol-14	0	38.0952	0.0684	17.7578	0.2112	0.2535	42.0348	0.3015	98.7224		0.985806	0.00139943	0.384296	0.00439601	0.00555629	1.62158	0.00835923	3.0114	80.8415		0.26	29.1	0.54	8.74	9.19	0.26	1.98		26-04-2013	30	15		25-04-2013	UoL	41.99	0.0002	4.83	0.1976	0.1392	51.77	0.0139	98.9409
3291.88	ML-22B	Ol-14	5.03508	40.0174	0.0455	13.5991	0.3514	0.1911	46.2283	0.2547	100.688		0.993306	0.000892937	0.282292	0.00701584	0.00401773	1.71061	0.00677362	3.00491	85.8351		0.25	44.34	0.62	5.67	11.61	0.25	2.24		26-04-2013	30	15		Session mean (n=9)		41.6156	0.0103778	4.85667	0.2046	0.161733	52.2078	0.0109111
3291.88	ML-22B	Ol-14	10.0351	39.9875	0.0763	13.0852	0.3196	0.1767	46.4076	0.2482	100.301		0.99376	0.00149919	0.271952	0.00638863	0.00371945	1.71931	0.00660871	3.00324	86.3428		0.25	25.68	0.64	6.16	12.87	0.25	2.29		26-04-2013	30	15		+/- (%)		0.665394	136.297	1.0699	6.89254	13.6102	0.65151	31.2633
3291.88	ML-22B	Ol-14	15.0351	39.9776	0.0491	13.0852	0.3315	0.1959	46.5869	0.2416	100.468		0.99227	0.000963541	0.271612	0.00661821	0.00411845	1.7238	0.00642492	3.0058	86.3882		0.25	42.28	0.64	5.94	11.11	0.25	2.35		26-04-2013	30	15		Accepted values		41.84		4.67	0.19	0.12	53.02
3291.88	ML-22B	Ol-14	20.0351	40.0074	0.0765	13.0566	0.324	0.1535	46.2981	0.2359	100.152		0.995345	0.00150477	0.271656	0.00648368	0.00323465	1.71713	0.00628808	3.00165	86.3406		0.25	27.49	0.64	6.11	14.13	0.25	2.36		26-04-2013	30	15		Accuracy (%)		0.536435		-3.99714	-7.68421	-34.7778	1.53192
3291.88	ML-22B	Ol-14	25.0351	39.9477	0.0659	13.0852	0.3467	0.1509	46.2881	0.2347	100.119		0.994606	0.00129724	0.272455	0.00694316	0.00318225	1.71806	0.0062608	3.0028	86.3123		0.25	30.93	0.64	5.6	14.55	0.25	2.39		26-04-2013	30	15		EMPA software calculated Precision (%)		0.251827	54.287	0.644167	9.43747	12.916	0.285288	2.45561
3291.88	ML-22B	Ol-14	30.0351	39.9079	0.0829	13.1518	0.3286	0.1781	46.1188	0.2349	100.003		0.995022	0.0016342	0.27423	0.00659001	0.00376118	1.7142	0.00627502	3.00171	86.2087		0.25	24.51	0.63	5.94	12.44	0.25	2.4		26-04-2013	30	15
3291.88	ML-22B	Ol-14	35.0351	39.8381	0.064	13.1232	0.341	0.1756	46.1088	0.2404	99.8912		0.994581	0.00126327	0.273992	0.00684762	0.00371323	1.71606	0.00643033	3.00289	86.2319		0.25	33.05	0.63	5.75	12.32	0.25	2.35		26-04-2013	30	15		Olivine Secondary Standard: GeO2 MKII Olivine - Probe for EPMA Interface
3291.88	ML-22B	Ol-14	40.0351	40.107	0.0726	13.1423	0.3129	0.1929	46.3977	0.2474	100.473		0.995057	0.0014241	0.27268	0.0062442	0.00405364	1.71606	0.00657635	3.00209	86.2888		0.25	28.06	0.63	6.23	11.75	0.25	2.28		26-04-2013	30	15		Session	Instution	SiO2	Cr2O3	FeO	NiO	MnO	MgO	CaO	Total
3291.88	ML-22B	Ol-14	45.0351	40.0473	0.0739	13.285	0.3454	0.1497	46.3678	0.244	100.513		0.993918	0.0014501	0.275737	0.00689515	0.00314691	1.71555	0.00648821	3.00318	86.1528		0.25	27.26	0.63	5.68	14.71	0.25	2.33		26-04-2013	30	15		Date		wt%	wt%	wt%	wt%	wt%	wt%	wt%	wt%
3291.88	ML-22B	Ol-14	50.0351	40.117	0.0384	13.266	0.3174	0.1835	46.3578	0.2447	100.525		0.995455	0.000753355	0.275289	0.00633496	0.00385669	1.71484	0.00650556	3.00304	86.1673		0.25	53.26	0.63	6.18	11.99	0.25	2.32		26-04-2013	30	15		26-04-2013	UoL	41.25	0	4.86	0.1915	0.1342	52.59	0.012	99.0378
3291.88	ML-22B	Ol-14	55.0351	40.1469	0.0799	13.285	0.3409	0.1587	46.2283	0.2409	100.481		0.996351	0.00156777	0.275727	0.00680505	0.00333598	1.71032	0.00640553	3.00051	86.1168		0.25	25.5	0.63	5.73	13.76	0.25	2.36		26-04-2013	30	15		26-04-2013	UoL	41.1	0.0095	4.99	0.2171	0.1427	52.65	0.0138	99.1232
3291.88	ML-22B	Ol-14	60.0351	39.878	0.0454	13.1994	0.2981	0.1689	46.1786	0.2356	100.004		0.994596	0.000895251	0.27531	0.00598025	0.00356803	1.71697	0.00629573	3.00361	86.1811		0.25	43.74	0.63	6.55	13.09	0.25	2.4		26-04-2013	30	15		26-04-2013	UoL	40.91	0.0027	4.89	0.2018	0.1459	52.64	0.0168	98.8073
																																			26-04-2013	UoL	41.16	0.0178	4.91	0.2103	0.1745	52.82	0.0086	99.3012
3291.88	ML-22B	Ol-8	0	39.2107	0.048	17.5103	0.2261	0.2412	43.0409	0.2947	100.572		0.992396	0.0009605	0.370622	0.00460283	0.00517063	1.62394	0.00799132	3.00568	81.4184		0.26	39.69	0.55	8.32	9.87	0.26	2.02		26-04-2013	30	15		26-04-2013	UoL	41.15	0.0221	4.85	0.2077	0.1472	52.89	0.017	99.284
3291.88	ML-22B	Ol-8	5.00012	39.629	0.0582	14.7696	0.2722	0.2059	44.794	0.2611	99.99		0.995716	0.00115617	0.310347	0.00550116	0.00438192	1.67784	0.0070289	3.00197	84.3905		0.25	34.15	0.6	6.99	10.44	0.25	2.19		26-04-2013	30	15		26-04-2013	UoL	40.97	0.0073	4.81	0.2017	0.1221	52.78	0.0106	98.9018
3291.88	ML-22B	Ol-8	10.0001	40.0871	0.0692	13.0471	0.3189	0.1553	46.0291	0.2452	99.952		0.998939	0.00136338	0.271897	0.00639194	0.00327787	1.70992	0.00654655	2.99833	86.2804		0.25	28.52	0.63	6.11	14.08	0.25	2.29		26-04-2013	30	15		26-04-2013	UoL	40.9	0.0007	4.89	0.2195	0.1499	52.48	0.0054	98.6456
3291.88	ML-22B	Ol-8	15.0001	39.8381	0.0457	12.9234	0.3199	0.1709	47.1547	0.2386	100.691		0.986419	0.000894652	0.267605	0.00637119	0.00358418	1.74059	0.00632981	3.01179	86.6743		0.25	44.65	0.64	6.06	12.86	0.24	2.34		26-04-2013	30	15		26-04-2013	UoL	40.97	0.0155	4.91	0.2026	0.16	52.55	0.0121	98.8203
3291.88	ML-22B	Ol-8	20.0001	40.1668	0.0769	12.99	0.339	0.2039	46.2483	0.2355	100.26		0.997795	0.00151034	0.269861	0.00677357	0.00429019	1.71269	0.00626791	2.99918	86.3882		0.25	26.59	0.64	5.78	11.38	0.25	2.39		26-04-2013	30	15		26-04-2013	UoL	40.84	0	4.92	0.1877	0.1784	52.45	0.0064	98.5826
3291.88	ML-22B	Ol-8	25.0001	39.9975	0.058	13.2279	0.3612	0.2034	46.5869	0.2315	100.666		0.991535	0.00113679	0.274235	0.00720223	0.00427083	1.72166	0.00614871	3.00619	86.2601		0.25	35.36	0.63	5.5	11.18	0.25	2.42		26-04-2013	30	15		26-04-2013	UoL	41.06	0.0241	4.94	0.1946	0.1174	52.58	0.0083	98.9245
3291.88	ML-22B	Ol-8	30.0001	40.0473	0.1009	13.0852	0.3251	0.1959	46.6467	0.2318	100.633		0.991933	0.00197595	0.271047	0.00647695	0.00410988	1.72242	0.00615149	3.00411	86.4032		0.25	20.59	0.64	6.13	11.47	0.25	2.42		26-04-2013	30	15		26-04-2013	UoL	41.06	0.0132	4.9	0.2086	0.155	52.61	0.0132	98.9601
3291.88	ML-22B	Ol-8	35.0001	40.2564	0.0914	13.0661	0.3691	0.1827	46.4873	0.2224	100.675		0.996149	0.00178818	0.270391	0.00734644	0.00382925	1.71487	0.00589633	3.00027	86.3801		0.25	22.06	0.64	5.39	11.95	0.25	2.5		26-04-2013	30	15		26-04-2013	UoL	41.19	0	4.96	0.1864	0.1378	52.74	0.0111	99.2253
3291.88	ML-22B	Ol-8	40.0001	40.0971	0.0879	12.99	0.361	0.1846	46.7662	0.2188	100.706		0.992106	0.00171953	0.268788	0.00718449	0.00386868	1.72499	0.0058003	3.00446	86.5186		0.25	23.72	0.64	5.5	11.9	0.25	2.53		26-04-2013	30	15		26-04-2013	UoL	41.26	0.0096	5.01	0.1944	0.1546	52.76	0.0097	99.3984
3291.88	ML-22B	Ol-8	45.0001	40.117	0.056	13.0376	0.3652	0.1934	46.7264	0.2224	100.718		0.992849	0.00109577	0.269841	0.00726991	0.00405412	1.72395	0.00589722	3.00496	86.466		0.25	36.2	0.64	5.47	11.78	0.25	2.49		26-04-2013	30	15		26-04-2013	UoL	41.2	0	4.98	0.1746	0.1472	52.54	0.0132	99.0551
3291.88	ML-22B	Ol-8	50.0001	40.127	0.0955	12.9615	0.3732	0.2172	46.7463	0.2215	100.742		0.992449	0.00186746	0.268091	0.00742433	0.00455006	1.72357	0.00586953	3.00382	86.5393		0.25	22.24	0.64	5.41	10.44	0.25	2.51		26-04-2013	30	15		26-04-2013	UoL	41.37	0.0058	5.03	0.1871	0.1539	52.6	0.0192	99.3661
3291.88	ML-22B	Ol-8	55.0001	40.2465	0.0808	12.9424	0.3754	0.1724	46.8559	0.22	100.893		0.993477	0.00157695	0.267179	0.00745364	0.00360457	1.72426	0.00581849	3.00337	86.5836		0.25	25.56	0.64	5.35	12.56	0.25	2.51		26-04-2013	30	15		26-04-2013	UoL	41.21	0.017	4.95	0.2115	0.149	52.56	0.0175	99.1151
3291.88	ML-22B	Ol-8	60.0001	40.356	0.081	12.7806	0.3708	0.1902	46.8658	0.2216	100.866		0.995492	0.00157976	0.263656	0.00735721	0.00397398	1.72343	0.00585675	3.00135	86.7315		0.25	25.94	0.65	5.43	11.98	0.24	2.51		26-04-2013	30	15		26-04-2013	UoL	41.12	0.0056	4.92	0.2114	0.1468	52.61	0.0012	99.0151
3291.88	ML-22B	Ol-8	65.0001	40.3162	0.1023	12.8758	0.3782	0.2031	47.0053	0.2181	101.099		0.992847	0.00199184	0.265176	0.00749149	0.00423642	1.72567	0.00575461	3.00317	86.6803		0.25	19.81	0.64	5.34	11.01	0.24	2.52		26-04-2013	30	15		26-04-2013	UoL	41.15	0.0081	4.95	0.1967	0.1332	52.62	0.0119	99.07
3291.88	ML-22B	Ol-8	70.0001	40.4258	0.0495	12.9139	0.3979	0.1592	47.1846	0.209	101.34		0.993332	0.00096165	0.265368	0.00786419	0.00331333	1.7284	0.00550225	3.00474	86.6901		0.25	41.62	0.64	5.08	13.63	0.24	2.64		26-04-2013	30	15		26-04-2013	UoL	41.16	0	4.94	0.2101	0.1346	52.58	0.0115	99.0363
3291.88	ML-22B	Ol-8	75.0001	40.356	0.0685	12.8092	0.4027	0.1752	46.9555	0.2083	100.975		0.994715	0.00133492	0.264039	0.00798392	0.00365772	1.72538	0.00550095	3.00261	86.7278		0.25	30.81	0.64	5.04	12.42	0.24	2.64		26-04-2013	30	15		26-04-2013	UoL	41.22	0.0328	4.88	0.1936	0.1514	52.67	0.012	99.1599
3291.88	ML-22B	Ol-8	80.0001	40.3162	0.0603	12.6284	0.3689	0.1631	46.8559	0.2065	100.599		0.996424	0.0011783	0.261017	0.0073336	0.00341432	1.72638	0.00546818	3.00122	86.8664		0.25	33.41	0.65	5.49	13.55	0.25	2.67		26-04-2013	30	15		26-04-2013	UoL	41.13	0	4.99	0.2169	0.1404	52.53	0.0071	99.0145
3291.88	ML-22B	Ol-8	85.0001	40.4457	0.0685	12.7235	0.3691	0.1867	47.1049	0.2058	101.104		0.995021	0.00133238	0.261773	0.00730379	0.00389037	1.72757	0.00542455	3.00231	86.8412		0.25	30.03	0.65	5.38	11.78	0.24	2.68		26-04-2013	30	15		Mean (n=21)		41.1133		4.92762	0.201229	0.146486	52.631	0.0113619
3291.88	ML-22B	Ol-8	90.0001	40.1967	0.1025	12.5998	0.3766	0.1353	47.085	0.2032	100.699		0.992502	0.00200097	0.260173	0.00747938	0.0028296	1.73313	0.00537555	3.0035	86.9477		0.25	19.7	0.65	5.39	16.19	0.24	2.69		26-04-2013	30	15		+/- (%)		0.32454		1.12242	5.95867	9.96196	0.212421	38.2048
3291.88	ML-22B	Ol-8	95.0001	40.1469	0.1101	12.714	0.3564	0.1591	46.9854	0.2104	100.682		0.992026	0.00215097	0.26273	0.00708358	0.00332987	1.73078	0.00557025	3.00367	86.8207		0.25	19.29	0.65	5.69	13.48	0.24	2.61		26-04-2013	30	15		Accepted values		41.84		4.67	0.19	0.12	53.02
3291.88	ML-22B	Ol-8	100	40.366	0.0761	12.5618	0.3727	0.181	47.1348	0.2054	100.898		0.994495	0.00148234	0.258818	0.00738568	0.00377704	1.73116	0.00542182	3.00254	86.9939		0.25	26.88	0.65	5.36	11.83	0.24	2.68		26-04-2013	30	15		Accuracy (%)		1.73678		-5.51647	-5.90977	-22.0714	0.733775
3291.88	ML-22B	Ol-8	105	40.1369	0.0848	12.5142	0.3915	0.1625	47.2244	0.1977	100.712		0.991003	0.0016554	0.258398	0.00777511	0.00339837	1.73823	0.00522992	3.00569	87.0583		0.25	25.2	0.65	5.15	13.25	0.24	2.74		26-04-2013	30	15		EMPA software calculated Precision (%)		0.253174	52.1804	0.622218	12.9218	12.9426	0.291638	2.27379
3291.88	ML-22B	Ol-8	110	40.3361	0.1037	12.4761	0.3993	0.1696	47.0949	0.2029	100.783		0.994471	0.0020214	0.257237	0.00791847	0.00354168	1.73094	0.00535967	3.00149	87.0616		0.25	21.76	0.65	5.17	12.77	0.24	2.7		26-04-2013	30	15
3291.88	ML-22B	Ol-8	115	40.1369	0.1022	12.5903	0.4322	0.1695	47.2244	0.2008	100.856		0.990105	0.00199326	0.259735	0.00857563	0.00354154	1.73665	0.00530712	3.00591	86.9898		0.25	20.67	0.65	4.76	13.15	0.24	2.7		26-04-2013	30	15		Olivine Secondary Standard: GeO2 MKII Olivine - Probe for EPMA Interface
3291.88	ML-22B	Ol-8	120	40.366	0.0849	12.5618	0.407	0.175	47.2145	0.1997	101.009		0.99354	0.00165216	0.258569	0.00805765	0.00364833	1.73242	0.0052663	3.00316	87.013		0.25	24.14	0.65	5.01	12.76	0.24	2.73		26-04-2013	30	15		Session	Instution	SiO2	Cr2O3	FeO	NiO	MnO	MgO	CaO	Total
3291.88	ML-22B	Ol-8	125	40.2963	0.092	12.5523	0.428	0.1524	47.1248	0.1989	100.845		0.993458	0.00179328	0.258799	0.00848736	0.00318241	1.73198	0.00525384	3.00296	87.0001		0.25	22.92	0.65	4.73	14.3	0.24	2.75		26-04-2013	30	15		Date		wt%	wt%	wt%	wt%	wt%	wt%	wt%	wt%
3291.88	ML-22B	Ol-8	130	40.2863	0.1056	12.5332	0.4262	0.1639	47.2444	0.2012	100.961		0.992079	0.00205602	0.258112	0.00844202	0.00341864	1.73439	0.00530853	3.00381	87.0459		0.25	20.28	0.65	4.78	13.18	0.24	2.7		26-04-2013	30	15		29-04-2013	UoL	41.42	0.0219	4.97	0.221	0.1717	52.51	0.0147	99.3294
																																			29-04-2013	UoL	41.08	0	4.98	0.2107	0.1323	52.68	0.0133	99.0964
3291.88	ML-22B	Ol-9	0	39.7286	0.0387	19.8038	0.1859	0.2409	41.0985	0.3667	101.463		1.00499	0.000774007	0.418951	0.00378253	0.00516156	1.54986	0.00993865	2.99346	78.7206		0.25	51.54	0.51	10.15	9.73	0.27	1.73		26-04-2013	30	15		29-04-2013	UoL	41	0.0023	4.99	0.2107	0.1338	52.41	0.0082	98.7551
3291.88	ML-22B	Ol-9	5.98845	39.7087	0.0373	16.2637	0.2709	0.2248	44.286	0.2642	101.056		0.993846	0.000738105	0.340415	0.00545364	0.00476558	1.65238	0.00708475	3.00468	82.9177		0.26	53.92	0.57	7.05	9.92	0.26	2.19		26-04-2013	30	15		29-04-2013	UoL	40.74	0	4.95	0.2094	0.1379	52.63	0.0111	98.6785
3291.88	ML-22B	Ol-9	11.9884	40.1768	0.0363	13.4849	0.3512	0.2361	46.328	0.2378	100.851		0.994978	0.000710756	0.279281	0.0069958	0.00495245	1.71037	0.00630969	3.0036	85.9633		0.25	55.32	0.63	5.66	9.39	0.25	2.38		26-04-2013	30	15		29-04-2013	UoL	40.61	0	4.93	0.1939	0.1667	52.74	0.0172	98.6579
3291.88	ML-22B	Ol-9	17.9884	40.3261	0.0631	13.3231	0.3202	0.2004	46.6367	0.2473	101.117		0.994722	0.00123061	0.274837	0.00635302	0.00418696	1.71495	0.00653577	3.00282	86.1876		0.25	32.24	0.63	6.19	11.11	0.25	2.31		26-04-2013	30	15		29-04-2013	UoL	40.63	0	4.93	0.2197	0.1739	52.79	0.0101	98.7538
3291.88	ML-22B	Ol-9	23.9884	40.2564	0.0716	13.2089	0.3327	0.2084	46.5869	0.2399	100.905		0.994721	0.0013988	0.272953	0.00661245	0.00436163	1.71608	0.00635117	3.00248	86.2771		0.25	27.9	0.63	5.9	10.62	0.25	2.35		26-04-2013	30	15		29-04-2013	UoL	40.68	0.0056	5	0.2139	0.167	52.93	0.0122	99.0088
3291.88	ML-22B	Ol-9	29.9884	40.2365	0.0692	12.9995	0.3578	0.1554	46.4176	0.2399	100.476		0.997295	0.00135608	0.269455	0.00713325	0.00326242	1.71512	0.00637076	2.99999	86.4225		0.25	28.63	0.64	5.55	14.64	0.25	2.35		26-04-2013	30	15		29-04-2013	UoL	40.73	0	5.02	0.2089	0.1504	52.91	0.0105	99.0299
3291.88	ML-22B	Ol-9	35.9884	40.1967	0.0959	13.1613	0.3668	0.1919	46.7563	0.2221	100.991		0.992354	0.00187185	0.271726	0.00728366	0.00401271	1.72078	0.00587466	3.0039	86.3626		0.25	21.5	0.64	5.43	11.58	0.25	2.52		26-04-2013	30	15		29-04-2013	UoL	40.76	0.0234	4.98	0.1929	0.145	52.87	0.0107	98.982
3291.88	ML-22B	Ol-9	41.9884	40.1768	0.0953	13.0947	0.3404	0.1816	46.5471	0.2225	100.658		0.994553	0.00186518	0.271084	0.00677777	0.00380763	1.71773	0.00590121	3.00172	86.3695		0.25	21.47	0.64	5.76	12.17	0.25	2.51		26-04-2013	30	15		29-04-2013	UoL	40.84	0.0038	4.93	0.2089	0.1432	52.48	0.0078	98.6138
3291.88	ML-22B	Ol-9	47.9884	40.1668	0.0575	13.0376	0.3418	0.1916	46.6666	0.2242	100.686		0.994108	0.00112515	0.269848	0.00680428	0.0040165	1.72179	0.00594511	3.00364	86.451		0.25	34.78	0.64	5.78	11.72	0.25	2.46		26-04-2013	30	15		29-04-2013	UoL	41.05	0	4.99	0.2115	0.1381	52.84	0.0124	99.2421
3291.88	ML-22B	Ol-9	53.9884	40.1469	0.0675	13.0757	0.3409	0.192	46.8559	0.2197	100.899		0.991819	0.00131844	0.270147	0.0067741	0.00401761	1.72565	0.00581525	3.00554	86.4642		0.25	30.46	0.64	5.81	11.47	0.25	2.54		26-04-2013	30	15		29-04-2013	UoL	40.78	0.0073	4.96	0.1941	0.1547	52.7	0.0089	98.8051
3291.88	ML-22B	Ol-9	59.9884	40.3461	0.0991	13.1328	0.3781	0.1781	47.0949	0.2163	101.445		0.991279	0.00192506	0.26984	0.00747214	0.00370633	1.72495	0.00569389	3.00487	86.4728		0.25	20.97	0.64	5.39	12.3	0.24	2.56		26-04-2013	30	15		Mean (n=12)		40.86		4.96917	0.207967	0.151225	52.7075	0.011425
3291.88	ML-22B	Ol-9	65.9884	40.366	0.0625	13.0186	0.3914	0.153	46.5969	0.2182	100.807		0.997241	0.00122079	0.26897	0.00777767	0.00320156	1.71613	0.0057756	3.00032	86.4506		0.25	32.71	0.64	5.14	14.27	0.25	2.52		26-04-2013	30	15		+/- (%)		0.578027		0.597337	4.5643	10.0666	0.32783	23.9416
3291.88	ML-22B	Ol-9	71.9884	40.2963	0.0985	13.009	0.3906	0.1619	46.8459	0.2085	101.011		0.993643	0.00192034	0.268267	0.00774714	0.00338141	1.72205	0.00550845	3.00252	86.5214		0.25	20.28	0.64	5.14	13.9	0.25	2.64		26-04-2013	30	15		Accepted values		41.84		4.67	0.19	0.12	53.02
3291.88	ML-22B	Ol-9	77.9884	40.2664	0.0557	12.8568	0.3789	0.1899	46.7463	0.2023	100.696		0.995541	0.0010888	0.265831	0.00753503	0.00397674	1.72295	0.00535883	3.00228	86.6335		0.25	37.51	0.64	5.34	11.67	0.25	2.72		26-04-2013	30	15		Accuracy (%)		2.34226		-6.40614	-9.45614	-26.0208	0.5894
3291.88	ML-22B	Ol-9	83.9884	40.1867	0.0749	12.9995	0.3691	0.1882	46.826	0.2015	100.846		0.992871	0.00146308	0.268593	0.00733497	0.00393836	1.72467	0.00533388	3.0042	86.525		0.25	27.72	0.64	5.44	11.69	0.25	2.71		26-04-2013	30	15		EMPA software calculated Precision (%)		0.271943	45.6685	0.612794	6.01385	11.7026	0.249717	2.50024
3291.88	ML-22B	Ol-9	89.9884	40.3959	0.0823	12.8948	0.3662	0.185	46.836	0.2097	100.97		0.995782	0.00160399	0.265827	0.00726088	0.00386264	1.72114	0.00553839	3.00101	86.6214		0.25	24.8	0.64	5.53	11.77	0.25	2.64		26-04-2013	30	15
3291.88	ML-22B	Ol-9	95.9884	40.2764	0.0802	12.9139	0.3831	0.1632	46.7264	0.2114	100.755		0.995255	0.00156687	0.266868	0.00761448	0.00341578	1.72129	0.00559689	3.00161	86.5771		0.25	25.8	0.64	5.21	13.14	0.25	2.62		26-04-2013	30	15		Olivine Secondary Standard: GeO2 MKII Olivine - Probe for EPMA Interface
3291.88	ML-22B	Ol-9	101.988	40.2066	0.1056	12.7426	0.3877	0.2033	46.8658	0.2059	100.718		0.993427	0.0020629	0.2633	0.00770509	0.00425462	1.72625	0.0054507	3.00245	86.7658		0.25	19.68	0.65	5.25	10.7	0.25	2.65		26-04-2013	30	15		Session	Instution	SiO2	Cr2O3	FeO	NiO	MnO	MgO	CaO	Total
3291.88	ML-22B	Ol-9	107.988	40.127	0.0944	12.695	0.4026	0.1624	47.2543	0.1985	100.934		0.989485	0.00184043	0.261795	0.00798529	0.00339191	1.73709	0.00524434	3.00683	86.903		0.25	23.14	0.65	5.03	13.2	0.24	2.75		26-04-2013	30	15		Date		wt%	wt%	wt%	wt%	wt%	wt%	wt%	wt%
3291.88	ML-22B	Ol-9	113.988	40.2564	0.0879	12.8092	0.3941	0.1558	46.8559	0.1979	100.757		0.99432	0.00171655	0.264587	0.00782963	0.00325945	1.7253	0.00523714	3.00225	86.7034		0.25	23.81	0.64	5.1	13.85	0.25	2.76		26-04-2013	30	15		30-04-2013	UoL	41.46	0	4.91	0.1946	0.1652	52.32	0.0079	99.0577
3291.88	ML-22B	Ol-9	119.988	40.4058	0.099	12.7426	0.4144	0.1732	46.9356	0.2089	100.979		0.995361	0.00192818	0.262512	0.00821108	0.00361385	1.72364	0.00551357	3.00078	86.7829		0.25	22.13	0.65	4.96	12.34	0.25	2.61		26-04-2013	30	15		30-04-2013	UoL	41.24	0.0188	4.97	0.2124	0.133	52.4	0.0133	98.9876
3291.88	ML-22B	Ol-9	125.988	40.3461	0.1223	12.7711	0.3886	0.1256	46.816	0.203	100.773		0.995642	0.00238618	0.263565	0.00771345	0.00262529	1.72229	0.0053673	2.99959	86.7279		0.25	17.25	0.65	5.2	17.12	0.25	2.71		26-04-2013	30	15		30-04-2013	UoL	41.14	0	4.86	0.1847	0.1574	52.65	0.0143	99.0065
3291.88	ML-22B	Ol-9	131.988	40.2863	0.1045	12.7045	0.3982	0.1624	47.0252	0.208	100.889		0.993318	0.00203715	0.261966	0.00789725	0.00339158	1.7285	0.0054948	3.00261	86.839		0.25	20.51	0.65	5.15	13.33	0.24	2.63		26-04-2013	30	15		30-04-2013	UoL	40.52	0	4.87	0.1837	0.1542	53.06	0.0168	98.8048
3291.88	ML-22B	Ol-9	137.988	40.366	0.087	12.7331	0.4188	0.1703	47.1348	0.2002	101.11		0.993323	0.00169266	0.262038	0.00828945	0.00354957	1.72912	0.00527833	3.00329	86.8399		0.25	23.69	0.65	4.87	12.92	0.24	2.72		26-04-2013	30	15		30-04-2013	UoL	40.47	0.0217	4.94	0.2168	0.1296	53.14	0.0105	98.9287
3291.88	ML-22B	Ol-9	143.988	40.2564	0.0697	12.6189	0.4417	0.1628	47.1547	0.2014	100.906		0.992536	0.00135869	0.260188	0.00875956	0.00339978	1.73318	0.0053202	3.00475	86.9473		0.25	29.96	0.65	4.7	13.57	0.24	2.71		26-04-2013	30	15		30-04-2013	UoL	40.54	0.0014	4.98	0.2059	0.1626	53.16	0.0141	99.064
3291.88	ML-22B	Ol-9	149.988	40.376	0.1391	12.7235	0.4406	0.1732	47.2244	0.2116	101.288		0.99173	0.0027013	0.261357	0.0087048	0.00360333	1.7292	0.00556857	3.00287	86.8702		0.25	15.43	0.65	4.65	12.5	0.24	2.6		26-04-2013	30	15		30-04-2013	UoL	40.29	0	4.92	0.1883	0.1665	52.97	0.011	98.5459
3291.88	ML-22B	Ol-9	155.988	40.3959	0.0707	12.6569	0.4266	0.1601	46.9455	0.2095	100.865		0.996002	0.00137822	0.26098	0.00846034	0.00334349	1.72554	0.00553433	3.00124	86.8625		0.25	29.24	0.65	4.8	13.75	0.24	2.61		26-04-2013	30	15		30-04-2013	UoL	40.57	0.0147	4.86	0.1989	0.1252	52.85	0.0107	98.6296
3291.88	ML-22B	Ol-9	161.988	40.5751	0.0509	12.6379	0.4026	0.2009	47.0949	0.1984	101.161		0.997215	0.000989058	0.259752	0.00795878	0.0041821	1.72549	0.0052243	3.00081	86.9158		0.25	42.49	0.65	5.02	11.06	0.24	2.76		26-04-2013	30	15		30-04-2013	UoL	40.56	0.0124	4.9	0.2104	0.1734	52.89	0.0117	98.758
3291.88	ML-22B	Ol-9	167.988	40.376	0.0847	12.5332	0.4343	0.1738	47.1547	0.2042	100.961		0.9942	0.00164896	0.258089	0.00860171	0.00362482	1.73095	0.00538722	3.0025	87.0244		0.25	24.87	0.65	4.74	12.56	0.24	2.68		26-04-2013	30	15		30-04-2013	UoL	40.7	0.0062	4.91	0.1862	0.1257	52.69	0.0124	98.6305
3291.88	ML-22B	Ol-9	173.988	40.4357	0.107	12.4476	0.4249	0.1984	46.9455	0.2078	100.767		0.996861	0.00208559	0.256632	0.00842559	0.00414283	1.72533	0.00548874	2.99897	87.0516		0.25	19.69	0.66	4.76	11.07	0.24	2.62		26-04-2013	30	15		30-04-2013	UoL	40.76	0	4.97	0.208	0.1615	52.56	0.0154	98.6749
3291.88	ML-22B	Ol-9	179.988	40.3361	0.1238	12.6379	0.4158	0.1936	47.2543	0.2056	101.167		0.991678	0.00240643	0.259841	0.00822252	0.00403151	1.73191	0.00541573	3.00351	86.9542		0.25	17.21	0.65	4.91	11.58	0.24	2.66		26-04-2013	30	15		30-04-2013	UoL	41	0	4.9	0.2161	0.1311	52.66	0.0113	98.9186
3291.88	ML-22B	Ol-9	185.988	40.4556	0.11	12.5523	0.4168	0.155	47.1149	0.2022	101.007		0.995281	0.00213961	0.258252	0.00824781	0.00322986	1.72796	0.00532974	3.00044	86.9977		0.25	19.35	0.65	4.94	13.84	0.24	2.71		26-04-2013	30	15		30-04-2013	UoL	41.08	0.0034	4.87	0.2121	0.1675	52.65	0.014	98.9971
3291.88	ML-22B	Ol-9	191.988	40.4755	0.1164	12.7616	0.476	0.1827	47.2045	0.2058	101.423		0.993092	0.00225801	0.261853	0.00939394	0.00379683	1.72659	0.00541003	3.00239	86.8312		0.25	18.42	0.65	4.32	12.14	0.24	2.65		26-04-2013	30	15		30-04-2013	UoL	41.1	0.0059	4.92	0.2363	0.1517	52.42	0.0105	98.8445
3291.88	ML-22B	Ol-9	197.988	40.4158	0.0781	12.6284	0.4215	0.1747	47.1846	0.2039	101.107		0.99409	0.0015188	0.259764	0.00833904	0.0036396	1.73015	0.0053734	3.00287	86.946		0.25	26.76	0.65	4.81	11.97	0.24	2.69		26-04-2013	30	15		30-04-2013	UoL	41.12	0	4.99	0.1871	0.1393	52.56	0.0147	99.0112
3291.88	ML-22B	Ol-9	203.988	40.5552	0.0719	12.714	0.4304	0.1651	47.1348	0.203	101.274		0.99593	0.001396	0.261109	0.00850155	0.00343411	1.72557	0.00534116	3.00128	86.857		0.25	29.72	0.65	4.82	13.18	0.24	2.68		26-04-2013	30	15		Session mean (n=15)		40.8367		4.918	0.202767	0.149593	52.732	0.0125733
3291.88	ML-22B	Ol-9	209.988	40.3361	0.106	12.4761	0.4238	0.1478	46.9854	0.1988	100.674		0.995459	0.00206829	0.257493	0.00841268	0.00308951	1.72862	0.00525658	3.0004	87.0354		0.25	19.45	0.66	4.86	14.63	0.24	2.76		26-04-2013	30	15		+/- (%)		0.846395		0.893616	7.54342	11.4443	0.509266	18.6631
																																			Accepted values		41.84		4.67	0.19	0.12	53.02
3291.88	ML-22B	Ol-1	0	39.4995	0.0264	18.3763	0.182	0.2406	42.4233	0.3069	101.055		0.997767	0.00052725	0.388197	0.00369788	0.00514777	1.59754	0.008306	3.00118	80.4507		0.26	75.03	0.53	10.4	9.64	0.26	1.96		26-04-2013	30	15		Accuracy (%)		2.39802		-5.31049	-6.7193	-24.6611	0.543191
3291.88	ML-22B	Ol-1	5.01034	39.878	0.0899	15.9116	0.2514	0.2244	44.2959	0.2634	100.915		0.997042	0.00177712	0.332698	0.0050558	0.00475214	1.65102	0.00705593	2.9994	83.2286		0.25	21.9	0.58	7.58	10.47	0.26	2.21		26-04-2013	30	15		EMPA software calculated Precision (%)		0.25869	42.5079	0.62119	6.4052	12.1146	0.247976	2.45377
3291.88	ML-22B	Ol-1	10.0103	40.1867	0.0574	13.6562	0.327	0.1436	45.8996	0.2494	100.52		0.998382	0.00112746	0.283726	0.0065344	0.00302172	1.69993	0.00663847	2.99936	85.6969		0.25	34.92	0.62	6.07	15.31	0.25	2.3		26-04-2013	30	15
3291.88	ML-22B	Ol-1	15.0103	40.3361	0.0646	13.4373	0.294	0.2047	46.4076	0.243	100.987		0.996471	0.00126176	0.277612	0.005842	0.00428326	1.7091	0.00643183	3.00101	86.0266		0.25	30.15	0.63	6.72	11.12	0.25	2.35		26-04-2013	30	15		Olivine Secondary Standard: GeO2 MKII Olivine - Probe for EPMA Interface
3291.88	ML-22B	Ol-1	20.0103	40.3461	0.054	13.3136	0.3339	0.2059	46.308	0.2395	100.801		0.998121	0.00105621	0.275443	0.00664419	0.00431444	1.70784	0.00634812	2.99977	86.1117		0.25	35.39	0.63	5.88	10.92	0.25	2.37		26-04-2013	30	15		Session	Instution	SiO2	Cr2O3	FeO	NiO	MnO	MgO	CaO	Total
3291.88	ML-22B	Ol-1	25.0103	40.1568	0.065	13.2184	0.2966	0.1918	46.1188	0.2382	100.286		0.998115	0.00127735	0.274762	0.00592975	0.0040379	1.70886	0.00634338	2.99933	86.1485		0.25	30.75	0.63	6.56	11.64	0.25	2.35		26-04-2013	30	15		Date		wt%	wt%	wt%	wt%	wt%	wt%	wt%	wt%
3291.88	ML-22B	Ol-1	30.0103	40.2465	0.0516	13.3516	0.3367	0.1828	46.3479	0.2376	100.755		0.996477	0.0010101	0.276458	0.00670543	0.00383355	1.71072	0.00630294	3.0015	86.0879		0.25	38.78	0.63	5.81	12.1	0.25	2.37		26-04-2013	30	15		14-05-2014	UoL	41.3		4.88	0.2059	0.1336	52.41	0	98.9347
3291.88	ML-22B	Ol-1	35.0103	40.3361	0.04	13.285	0.3111	0.1913	46.3678	0.2291	100.76		0.998058	0.000782523	0.274903	0.00619164	0.00400925	1.71036	0.00607358	3.00038	86.1528		0.25	50.59	0.63	6.29	11.62	0.25	2.44		26-04-2013	30	15		14-05-2014	UoL	41.32		4.87	0.2	0.1296	52.36	0.0094	98.9007
3291.88	ML-22B	Ol-1	40.0103	40.366	0.0915	13.58	0.3054	0.2065	46.3778	0.2289	101.156		0.996016	0.00178504	0.280225	0.00606127	0.00431575	1.70596	0.00605137	3.00041	85.8913		0.25	22.75	0.63	6.45	11.1	0.25	2.45		26-04-2013	30	15		14-05-2014	UoL	41.29		4.86	0.1968	0.1577	52.5	0	99.0154
3291.88	ML-22B	Ol-1	45.0103	40.4755	0.0641	13.3326	0.3363	0.1624	46.0989	0.2351	100.705		1.00165	0.00125417	0.275927	0.00669413	0.00340404	1.70068	0.00623353	2.99584	86.0404		0.25	31.63	0.63	5.91	13.34	0.25	2.4		26-04-2013	30	15		14-05-2014	UoL	41.23		4.81	0.2136	0.1452	52.39	0	98.8028
3291.88	ML-22B	Ol-1	50.0103	40.2564	0.0792	13.5039	0.3098	0.1909	46.4076	0.2296	100.977		0.995008	0.00154772	0.27913	0.00615909	0.00399653	1.70997	0.00608024	3.0019	85.967		0.25	25.62	0.63	6.32	11.32	0.25	2.44		26-04-2013	30	15		14-05-2014	UoL	41.2		4.99	0.2286	0.1418	52.34	0	98.9036
3291.88	ML-22B	Ol-1	55.0103	40.2465	0.0466	13.3516	0.295	0.202	46.4176	0.2271	100.786		0.996085	0.000911864	0.27635	0.00587266	0.00423453	1.71262	0.00602204	3.00209	86.1059		0.25	42.75	0.63	6.54	10.94	0.25	2.47		26-04-2013	30	15		14-05-2014	UoL	41.31		4.94	0.2074	0.1547	52.33	0.0229	98.9721
3291.88	ML-22B	Ol-1	60.0103	40.1369	0.0707	13.4754	0.3501	0.1931	46.6069	0.225	101.058		0.991789	0.00138124	0.278466	0.00695843	0.00404151	1.71686	0.00595683	3.00545	86.0441		0.25	28.59	0.63	5.55	11.58	0.25	2.5		26-04-2013	30	15		14-05-2014	UoL	41.51		4.92	0.2338	0.1527	52.37	0.0082	99.2039
3291.88	ML-22B	Ol-1	65.0103	40.2664	0.0454	13.3231	0.3351	0.1744	46.3977	0.2224	100.764		0.996656	0.000888452	0.275781	0.00667146	0.00365624	1.71202	0.00589787	3.00157	86.1263		0.25	45.18	0.63	5.94	12.85	0.25	2.53		26-04-2013	30	15		14-05-2014	UoL	41.46		4.83	0.2052	0.1265	52.45	0	99.0794
3291.88	ML-22B	Ol-1	70.0103	40.356	0.0861	13.4183	0.3319	0.157	46.3778	0.221	100.948		0.996982	0.00168173	0.277224	0.00659523	0.00328522	1.70804	0.00584964	2.99965	86.0359		0.25	23.79	0.63	5.93	14.14	0.25	2.53		26-04-2013	30	15		14-05-2014	UoL	41.4		4.83	0.2317	0.1174	52.48	0	99.0711
3291.88	ML-22B	Ol-1	75.0103	40.3062	0.0767	13.4754	0.3583	0.1847	46.5073	0.226	101.135		0.994714	0.00149657	0.278113	0.00711241	0.00386081	1.71102	0.00597574	3.00229	86.0184		0.25	26.09	0.63	5.45	12.1	0.25	2.48		26-04-2013	30	15		Mean (n=9)		41.3356		4.88111	0.213667	0.139911	52.4033	0.0045
3291.88	ML-22B	Ol-1	80.0103	40.2664	0.0684	13.3612	0.3058	0.1758	46.3479	0.2417	100.767		0.996592	0.00133846	0.276551	0.00608774	0.00368536	1.71007	0.00640928	3.00073	86.0793		0.25	30.25	0.63	6.39	12.77	0.25	2.32		26-04-2013	30	15		+/- (%)		0.247634		1.20528	6.61071	9.99041	0.116858	175.288
3291.88	ML-22B	Ol-1	85.0103	40.2664	0.0745	13.3231	0.3217	0.1934	46.318	0.2401	100.737		0.996814	0.00145815	0.275824	0.0064057	0.00405521	1.70934	0.00636826	3.00027	86.1058		0.25	28	0.63	6.08	11.61	0.25	2.33		26-04-2013	30	15		Accepted values		41.84		4.67	0.19	0.12	53.02
3291.88	ML-22B	Ol-1	90.0103	40.2963	0.0664	13.3802	0.3109	0.1807	46.2283	0.2338	100.697		0.997995	0.00130019	0.277129	0.00619339	0.0037906	1.70679	0.00620391	2.9994	86.0312		0.25	31.15	0.63	6.28	12.1	0.25	2.42		26-04-2013	30	15		Accuracy (%)		1.20565		-4.52058	-12.4561	-16.5926	1.16308
3291.88	ML-22B	Ol-1	95.0103	40.4457	0.0676	13.3897	0.3472	0.1872	46.3778	0.236	101.051		0.998176	0.00131904	0.276352	0.00689222	0.00391315	1.70629	0.00624029	2.99919	86.0615		0.25	29.45	0.63	5.71	11.6	0.25	2.4		26-04-2013	30	15		EMPA software calculated Precision (%)		0.252276	39.8019	0.620488	32.6748	12.6011	0.268537	2.40138
3291.88	ML-22B	Ol-1	100.01	40.0971	0.0459	13.4849	0.3131	0.2082	46.4475	0.2337	100.83		0.99311	0.00089882	0.279311	0.00623752	0.00436768	1.71497	0.00620156	3.00509	85.9944		0.25	44.77	0.63	6.25	11.18	0.25	2.43		26-04-2013	30	15
3291.88	ML-22B	Ol-1	105.01	40.2465	0.0435	13.3421	0.2902	0.1939	46.5471	0.2409	100.904		0.994966	0.000850247	0.275843	0.00577061	0.00406017	1.71546	0.0063808	3.00333	86.1477		0.25	46.85	0.63	6.73	11.57	0.25	2.36		26-04-2013	30	15		Olivine Secondary Standard: GeO2 MKII Olivine - Probe for EPMA Interface
3291.88	ML-22B	Ol-1	110.01	40.2365	0.0535	13.3897	0.2929	0.1861	46.4076	0.2588	100.825		0.99564	0.00104667	0.277082	0.00582969	0.00390044	1.71191	0.00686126	3.00227	86.0692		0.25	37.58	0.63	6.63	12.19	0.25	2.21		26-04-2013	30	15		Session	Instution	SiO2	Cr2O3	FeO	NiO	MnO	MgO	CaO	Total
3291.88	ML-22B	Ol-1	115.01	39.858	0.0772	15.1598	0.3177	0.2138	45.0231	0.2601	100.91		0.993897	0.00152201	0.316136	0.00637216	0.00451563	1.67367	0.00694902	3.00306	84.1122		0.25	26.7	0.59	6.19	10.62	0.25	2.23		26-04-2013	30	15		Date		wt%	wt%	wt%	wt%	wt%	wt%	wt%	wt%
3291.88	ML-22B	Ol-1	120.01	39.1609	0.0423	18.6999	0.1985	0.2349	42.2839	0.3198	100.94		0.99269	0.000847768	0.396421	0.0040473	0.00504347	1.59788	0.00868555	3.00561	80.1223		0.26	47.21	0.53	9.39	9.91	0.26	1.92		26-04-2013	30	15		15-05-2013	UoL	41.26		4.96	0.2112	0.1463	52.51	0.008	99.1048
																																			15-05-2013	UoL	41.35		4.96	0.2132	0.1603	52.57	0	99.2611
3291.88	ML-22B	Ol-16	0	38.6799	0.035585	16.1556	0.246338	0.24193	42.8474	0.264935	98.4988		0.994258	0.000723196	0.347291	0.00509318	0.00526732	1.6419	0.00729644	3.00265	82.5411		0.214394	44.0828	0.453156	8.71389	5.75882	0.180332	4.63765		18-03-2014	30	15		15-05-2013	UoL	41.29		4.92	0.2162	0.1282	52.63	0.0099	99.2113
3291.88	ML-22B	Ol-16	5.0625	39.3943	0.024741	13.7373	0.303872	0.186418	45.4283	0.222572	99.3401		0.991989	0.000492568	0.289288	0.00615471	0.003976	1.70533	0.00600484	3.0045	85.4966		0.212515	67.675	0.493775	7.23905	7.19863	0.17355	5.46827		18-03-2014	30	15		15-05-2013	UoL	41.2		4.85	0.2026	0.1392	52.59	0	98.9882
3291.88	ML-22B	Ol-16	10.1625	39.387	0.045035	13.4153	0.305576	0.162555	45.5269	0.232484	99.11		0.992574	0.000897296	0.282726	0.00619403	0.00346973	1.71036	0.00627713	3.00354	85.8146		0.212572	36.9469	0.499394	7.16551	8.35431	0.173171	5.23286		18-03-2014	30	15		15-05-2013	UoL	41.19		4.81	0.2376	0.1297	52.48	0	98.8635
3291.88	ML-22B	Ol-16	15.2625	39.4016	0.083692	13.3806	0.350543	0.173048	45.5304	0.238393	99.1967		0.991943	0.00166584	0.281711	0.00709836	0.00368999	1.70877	0.00643019	3.00245	85.8471		0.212483	19.4297	0.500319	6.27968	7.68751	0.173169	5.04232		18-03-2014	30	15		15-05-2013	UoL	41.28		4.91	0.2111	0.147	52.73	0	99.2943
3291.88	ML-22B	Ol-16	20.3625	39.2799	0.063291	13.3258	0.264031	0.194779	45.5362	0.214897	98.9137		0.991488	0.00126309	0.281298	0.00536063	0.00416433	1.71349	0.00581172	3.00391	85.8984		0.212896	26.1577	0.500966	8.24853	6.89849	0.173068	5.56878		18-03-2014	30	15		15-05-2013	UoL	41.46		4.94	0.2048	0.1395	52.33	0	99.0924
3291.88	ML-22B	Ol-16	25.4625	39.4047	0.061671	13.4025	0.281269	0.189834	45.5108	0.229229	99.1109		0.992864	0.00122856	0.282412	0.00570043	0.00405137	1.70948	0.00618827	3.00284	85.8219		0.212441	26.7319	0.499535	7.71788	7.07133	0.173125	5.20785		18-03-2014	30	15		15-05-2013	UoL	41.33		4.92	0.2114	0.1643	52.51	0	99.1446
3291.88	ML-22B	Ol-16	30.5625	39.1133	0.033746	13.3452	0.286619	0.174943	45.3936	0.238898	98.6275		0.990722	0.000675811	0.282689	0.00583951	0.00375327	1.71408	0.00648332	3.00547	85.8427		0.213256	48.3988	0.501444	7.57715	7.64045	0.173346	4.97572		18-03-2014	30	15		15-05-2013	UoL	41.35		4.84	0.1928	0.1333	52.62	0.0004	99.1527
3291.88	ML-22B	Ol-16	35.6625	39.3704	0.05709	13.2243	0.339134	0.163238	45.4425	0.244803	98.875		0.993754	0.00113932	0.27915	0.00688533	0.00348993	1.70994	0.00662039	3.00197	85.9659		0.212592	29.18	0.503474	6.41586	8.25629	0.17323	4.91363		18-03-2014	30	15		Mean (n=9)		41.3011		4.90111	0.211211	0.143089	52.5522	0.00203333
3291.88	ML-22B	Ol-16	40.7625	39.2788	0.050307	13.2655	0.319729	0.159186	45.4781	0.217174	98.7995		0.992509	0.00100503	0.280321	0.00649833	0.00340696	1.71312	0.00587952	3.00365	85.9378		0.212725	33.226	0.502077	6.81785	8.35604	0.173023	5.37624		18-03-2014	30	15		+/- (%)		0.202012		1.11496	5.74891	8.89686	0.215028	194.371
3291.88	ML-22B	Ol-16	45.8625	39.3455	0.078546	13.2841	0.325874	0.209489	45.5246	0.241814	99.0363		0.992039	0.00156579	0.280106	0.00660887	0.00447384	1.71115	0.0065324	3.00326	85.9332		0.212583	21.6345	0.502222	6.62704	6.59503	0.173094	4.96216		18-03-2014	30	15		Accepted values		41.84		4.67	0.19	0.12	53.02
3291.88	ML-22B	Ol-16	50.9625	39.242	0.08087	13.2756	0.330407	0.196167	45.3839	0.230369	98.7838		0.991769	0.00161593	0.280588	0.00671664	0.00419924	1.7099	0.00623794	3.00235	85.9035		0.212921	19.6635	0.502179	6.65805	6.94093	0.173389	5.15674		18-03-2014	30	15		Accuracy (%)		1.28798		-4.94885	-11.1637	-19.2407	0.882267
																																			EMPA software calculated Precision (%)		0.25251	33.6396	0.663169	7.32605	13.4635	0.274321	2.53617
3291.88	ML-22B	Ol-5	0	38.5695	0.02915	18.1228	0.205389	0.22773	41.5872	0.274228	99.0694		0.994051	0.000593989	0.390612	0.0042578	0.00497131	1.59784	0.00757241	3.00152	80.3559		0.214555	56.8472	0.427051	10.2088	6.28253	0.184126	4.60833		18-03-2014	30	15
3291.88	ML-22B	Ol-5	5.2075	39.3713	0.073074	13.7083	0.286079	0.2084	45.398	0.243947	99.3073		0.991783	0.00145538	0.288786	0.00579651	0.00444652	1.70483	0.006584	3.00423	85.5145		0.212585	22.4128	0.493563	7.76328	6.49277	0.173546	4.96278		18-03-2014	30	15		Olivine Standard: GeO2 MKII Olivine - Jeol PC-EPMA Interface
3291.88	ML-22B	Ol-5	10.4075	39.525	0.027109	13.177	0.317627	0.170849	45.777	0.252842	99.265		0.993654	0.00053883	0.277036	0.0064228	0.00363799	1.71561	0.00681036	3.00423	86.0971		0.212216	61.0356	0.504463	6.93654	7.64089	0.172543	4.83941		18-03-2014	30	15		Session	Instution	SiO2	Cr2O3	FeO	NiO	MnO	MgO	CaO	Total
3291.88	ML-22B	Ol-5	15.6075	39.5962	0.033087	13.2678	0.323917	0.200031	45.6689	0.222519	99.3363		0.994874	0.000657275	0.278785	0.00654624	0.00425694	1.71058	0.00599017	3.0024	85.9862		0.212027	49.7811	0.501586	6.68269	6.67819	0.17281	5.44165		18-03-2014	30	15		Date		wt%	wt%	wt%	wt%	wt%	wt%	wt%	wt%
3291.88	ML-22B	Ol-5	20.8075	39.5402	0.047749	13.2742	0.32785	0.207305	45.8152	0.2608	99.5092		0.991977	0.000947115	0.278501	0.00661579	0.00440513	1.71349	0.00701016	3.00401	86.0189		0.212161	34.9482	0.502445	6.67409	6.51543	0.172539	4.73624		18-03-2014	30	15		28-01-2014	UoL	40.8449	-0.01896	4.93776	0.187846	0.13817	53.2045	0.005841	99.3001
3291.88	ML-22B	Ol-5	26.0075	39.4716	0.038268	13.3678	0.302638	0.197074	45.6848	0.251932	99.3472		0.992273	0.000760603	0.281036	0.00611947	0.00419625	1.71209	0.00678559	3.00424	85.8997		0.212395	41.885	0.500551	7.27934	6.8622	0.17282	4.78954		18-03-2014	30	15		28-01-2014	UoL	40.747	0.027029	4.9639	0.180209	0.162702	53.2584	0.014074	99.3533
3291.88	ML-22B	Ol-5	31.2075	39.7065	0.039216	13.4516	0.336218	0.156811	45.7772	0.238746	99.7414		0.994019	0.000776196	0.28162	0.00677014	0.00332503	1.7084	0.00640364	3.00235	85.8484		0.211727	41.3883	0.499038	6.48936	8.38736	0.172665	5.00813		18-03-2014	30	15		28-01-2014	UoL	40.9069	0.022141	4.90632	0.191106	0.155193	53.419	0.019432	99.6201
3291.88	ML-22B	Ol-5	36.4075	39.6168	0.057307	13.4782	0.353205	0.176426	45.6384	0.236519	99.5798		0.993865	0.00113666	0.282772	0.0071272	0.00374884	1.70682	0.00635729	3.0025	85.7874		0.211931	29.2217	0.498032	6.2606	7.59214	0.173027	5.00309		18-03-2014	30	15		28-01-2014	UoL	41.1188	0.008563	4.89353	0.226969	0.146153	53.3876	0.010249	99.7919
																																			28-01-2014	UoL	40.8874	-0.02085	4.8761	0.211439	0.146645	53.2887	0.015427	99.4049
3291.88	ML-22B	Ol-10	0	38.2243	0.049815	18.6499	0.172932	0.250017	40.5743	0.266408	98.2475		0.996087	0.00102634	0.406434	0.00362474	0.0055184	1.57622	0.00743811	2.99819	79.5005		0.215416	33.7856	0.421123	12.3348	5.72948	0.186872	4.6329		18-03-2014	30	15		Session mean (n=5)		40.901	0.0035846	4.91552	0.199514	0.149773	53.3116	0.0130046
3291.88	ML-22B	Ol-10	5.04538	39.0982	0.065351	14.5628	0.287866	0.198963	44.3994	0.251573	98.8896		0.993104	0.0013124	0.309342	0.00588129	0.00428052	1.68122	0.00684636	3.00275	84.4595		0.213308	25.5091	0.478461	7.69648	6.84061	0.176131	4.80365		18-03-2014	30	15		+/- (%)		0.333712	627.541	0.716187	9.62647	6.28163	0.168129	39.8142
3291.88	ML-22B	Ol-10	10.0454	39.6258	0.068187	13.2813	0.326243	0.191986	45.6164	0.253097	99.3882		0.994944	0.00135362	0.27888	0.00658879	0.00408297	1.70746	0.00680872	3.00086	85.9601		0.211971	24.6476	0.502601	6.7498	6.98843	0.173007	4.71281		18-03-2014	30	15		Accepted values		41.84		4.67	0.19	0.12	53.02
3291.88	ML-22B	Ol-10	15.0454	39.5558	0.091226	13.2439	0.353195	0.159175	45.7131	0.211802	99.3775		0.992797	0.00181027	0.277986	0.00713032	0.00338385	1.71041	0.00569558	3.00067	86.0196		0.21214	19.4521	0.503013	6.25579	8.13304	0.172734	5.61922		18-03-2014	30	15		Accuracy (%)		2.24426		-5.25743	-5.00726	-24.8105	-0.550057
3291.88	ML-22B	Ol-10	20.0454	39.6196	0.075189	13.1738	0.337	0.18186	45.6842	0.232676	99.3451		0.994482	0.00149216	0.276538	0.00680395	0.00386643	1.70947	0.00625743	3.00012	86.0757		0.211932	22.2767	0.504424	6.52952	7.39395	0.172742	5.13254		18-03-2014	30	15		EMPA software calculated Precision (%)		0.212631	28.7151	0.475622	3.45235	6.8679	0.235629	4.69847
3291.88	ML-22B	Ol-10	25.0454	39.585	0.103649	13.0636	0.333063	0.191224	45.6375	0.230294	99.1959		0.994383	0.00205856	0.274436	0.00672966	0.00406866	1.70904	0.00619817	2.99845	86.1639		0.212024	16.4969	0.506665	6.71639	6.94041	0.172767	5.17437		18-03-2014	30	15
3291.88	ML-22B	Ol-10	30.0454	39.5568	0.098571	13.1062	-0.2949	0.178813	45.5065	0.231443	98.4114		0.998856	0.00196792	0.276767	-0.00598964	0.00382443	1.71303	0.00626158	2.99555	86.0907		0.211944	17.3402	0.505774	0	7.36256	0.17255	5.22349		18-03-2014	30	15		Olivine Standard: GeO2 MKII Olivine - Jeol PC-EPMA Interface
3291.88	ML-22B	Ol-10	35.0454	39.613	0.128632	13.0138	0.347827	0.195697	45.8848	0.205222	99.4122		0.993024	0.00254945	0.272824	0.00701341	0.0041552	1.71474	0.00551193	3.00051	86.2735		0.211937	14.1351	0.506641	6.38213	6.95206	0.17222	5.68787		18-03-2014	30	15		Session	Instution	SiO2	Cr2O3	FeO	NiO	MnO	MgO	CaO	Total
3291.88	ML-22B	Ol-10	40.0454	39.6718	0.115184	12.9836	0.332258	0.158352	45.7439	0.2267	99.2616		0.995416	0.00228502	0.272442	0.00670567	0.00336536	1.71106	0.00609441	2.99825	86.2646		0.211723	15.0627	0.507754	6.70015	8.43949	0.172521	5.24128		18-03-2014	30	15		Date		wt%	wt%	wt%	wt%	wt%	wt%	wt%	wt%
3291.88	ML-22B	Ol-10	45.0454	39.5496	0.06224	12.8905	0.313479	0.171553	45.7615	0.237872	99.0301		0.994633	0.00123756	0.271111	0.00634123	0.00365431	1.71565	0.00640947	3.00032	86.3542		0.212105	26.4789	0.510017	6.88992	7.87955	0.172399	5.0096		18-03-2014	30	15		29-01-2014	UoL	41.8255	0.006275	4.92755	0.194852	0.141537	53.3206	0.00644	100.423
3291.88	ML-22B	Ol-10	50.0454	39.7081	0.085783	12.9418	0.300518	0.1932	45.8006	0.222964	99.3007		0.995604	0.00170053	0.271368	0.00606069	0.00410299	1.71194	0.00598963	2.99817	86.3174		0.211628	19.709	0.50916	7.29169	6.87223	0.172335	5.26659		18-03-2014	30	15		29-01-2014	UoL	41.7433	-0.00626	4.97658	0.186085	0.161073	53.5064	0.006231	100.573
3291.88	ML-22B	Ol-10	55.0454	39.5897	0.107573	12.8541	0.359766	0.178641	45.9076	0.252587	99.2938		0.99292	0.0021331	0.269606	0.00725765	0.00379489	1.71643	0.00678736	3.00022	86.4249		0.212011	15.8632	0.510339	6.23095	7.45795	0.172181	4.83177		18-03-2014	30	15		29-01-2014	UoL	41.7516	0.001592	4.80406	0.190711	0.144794	53.4467	0.018626	100.358
3291.88	ML-22B	Ol-10	60.0454	39.5483	0.113911	12.8298	0.353624	0.178676	45.8195	0.224055	99.1049		0.993619	0.00226273	0.269568	0.00714624	0.00380228	1.71613	0.00603121	2.99966	86.4246		0.212129	15.0027	0.511495	6.40963	7.43497	0.172332	5.35432		18-03-2014	30	15		29-01-2014	UoL	41.701	-0.01473	4.87139	0.192325	0.15933	53.4339	0.005977	100.349
																																			29-01-2014	UoL	41.7753	-0.0136	4.90159	0.215699	0.155547	53.4831	0.020194	100.538
																																			Session Mean (n=5)		41.7593	-0.0053446	4.89623	0.195934	0.152456	53.4381	0.0114936
3291.88	ML-22C	Ol-2	0	40.1574	0.0182	15.7148	0.281	0.2125	44.0936	0.2552	100.733		1.00448	0.000359935	0.328733	0.00565363	0.00450217	1.64422	0.00683936	2.9948	83.3381		0.25	104.02	0.57	6.49	10.42	0.25	2.22		25-03-2013	30	15		+/- (%)		0.109428	-172.555	1.31485	5.87005	5.76497	0.134253	63.0763
3291.88	ML-22C	Ol-2	8.00459	40.5035	0.0805	13.089	0.3495	0.1797	46.33	0.2362	100.768		1.00072	0.0015725	0.270448	0.00694562	0.00376057	1.70644	0.00625256	2.99614	86.3195		0.25	24.3	0.63	5.37	11.9	0.24	2.34		25-03-2013	30	15		Accepted values		41.84		4.67	0.19	0.12	53.02
3291.88	ML-22C	Ol-2	16.0046	40.4729	0.0627	12.8585	0.3425	0.1684	46.9445	0.2272	101.077		0.996302	0.00122031	0.264712	0.00678158	0.00351119	1.72274	0.00599228	3.00126	86.6808		0.25	30.14	0.64	5.52	12.55	0.24	2.43		25-03-2013	30	15		Accuracy (%)		0.192782		-4.84441	-3.12337	-27.0468	-0.788646
3291.88	ML-22C	Ol-2	24.0046	40.6154	0.0581	12.608	0.3566	0.1549	46.7027	0.2189	100.715		1.00169	0.00113291	0.260041	0.00707404	0.00323578	1.71709	0.00578423	2.99605	86.8475		0.25	33.12	0.64	5.39	13.69	0.24	2.51		25-03-2013	30	15		EMPA software calculated Precision (%)		0.212631	28.7151	0.475622	3.45235	6.8679	0.235629	4.69847
3291.88	ML-22C	Ol-2	32.0046	40.2999	0.0913	12.5879	0.3387	0.1718	46.8538	0.2135	100.557		0.996055	0.00178413	0.260189	0.00673346	0.00359657	1.72636	0.00565373	3.00038	86.9025		0.25	21.47	0.64	5.58	12.19	0.24	2.53		25-03-2013	30	15
3291.88	ML-22C	Ol-2	40.0046	40.6765	0.0676	12.7583	0.3681	0.1744	46.9747	0.2225	101.242		0.99885	0.00131244	0.262003	0.00727054	0.00362735	1.71961	0.00585389	2.99853	86.7783		0.25	29.25	0.64	5.1	11.92	0.24	2.45		25-03-2013	30	15		Olivine Standard: GeO2 MKII Olivine - Jeol PC-EPMA Interface
3291.88	ML-22C	Ol-2	48.0046	40.4526	0.0531	12.3574	0.3621	0.1456	46.9243	0.2143	100.509		0.999059	0.00103685	0.255228	0.00719312	0.00304574	1.72763	0.00567055	2.99887	87.1283		0.25	39.02	0.65	5.2	14.15	0.24	2.54		25-03-2013	30	15		Session	Instution	SiO2	Cr2O3	FeO	NiO	MnO	MgO	CaO	Total
3291.88	ML-22C	Ol-2	56.0046	40.422	0.0736	12.608	0.3661	0.1212	46.9344	0.2344	100.76		0.996974	0.00143522	0.260056	0.00726289	0.00253194	1.7257	0.00619414	3.00016	86.904		0.25	26.68	0.64	5.17	17.4	0.24	2.36		25-03-2013	30	15		Date		wt%	wt%	wt%	wt%	wt%	wt%	wt%	wt%
3291.88	ML-22C	Ol-2	64.0046	40.6256	0.0667	12.5779	0.3715	0.1691	46.9143	0.2204	100.945		0.999742	0.00129775	0.258852	0.00735345	0.00352466	1.72108	0.00581109	2.99766	86.9262		0.25	28.81	0.64	5.16	12.58	0.24	2.47		25-03-2013	30	15		07-02-2014	UoL	41.6351	0.006203	4.72886	0.210694	0.160563	53.3811	0.007436	100.13
3291.88	ML-22C	Ol-2	72.0046	40.4424	0.084	12.7282	0.3526	0.1596	46.8337	0.221	100.821		0.997334	0.00163779	0.262499	0.00699407	0.00333367	1.72175	0.00583921	2.99939	86.7709		0.25	23.33	0.64	5.4	13.63	0.24	2.47		25-03-2013	30	15		07-02-2014	UoL	41.5221	0.004467	4.8102	0.208327	0.14868	52.9519	0.029627	99.6753
3291.88	ML-22C	Ol-2	80.0046	40.3508	0.0687	12.7182	0.3644	0.1767	46.7329	0.2237	100.635		0.997235	0.00134239	0.262861	0.00724382	0.00369886	1.72178	0.00592337	3.00008	86.7552		0.25	29.26	0.64	5.29	11.78	0.24	2.46		25-03-2013	30	15		07-02-2014	UoL	41.6148	-0.02358	4.77694	0.197406	0.15633	53.1462	0.001902	99.87
3291.88	ML-22C	Ol-2	88.0046	40.2796	0.0569	12.5077	0.3428	0.1678	46.6624	0.2313	100.249		0.998363	0.00111504	0.259262	0.00683421	0.00352275	1.72417	0.00614239	2.99941	86.9286		0.25	35.65	0.65	5.5	12.38	0.24	2.37		25-03-2013	30	15		07-02-2014	UoL	41.6455	0.007126	4.74606	0.226765	0.162286	53.1987	0.012774	99.9992
3291.88	ML-22C	Ol-2	96.0046	40.4526	0.064	12.7683	0.3605	0.1734	46.743	0.2179	100.78		0.998287	0.00124872	0.263511	0.0071558	0.00362447	1.71963	0.00576135	2.99922	86.7124		0.25	31.14	0.64	5.34	12.08	0.24	2.52		25-03-2013	30	15		07-02-2014	UoL	41.5071	0.017992	4.87685	0.170831	0.167367	53.057	0.006297	99.8034
3291.88	ML-22C	Ol-2	104.005	40.4627	0.0516	12.8084	0.3604	0.2167	46.8437	0.2205	100.964		0.997221	0.00100545	0.26399	0.00714439	0.00452357	1.72106	0.00582241	3.00077	86.7011		0.25	38	0.64	5.25	9.76	0.24	2.5		25-03-2013	30	15		Session mean (n=5)		41.5849	0.0024416	4.78778	0.202805	0.159045	53.147	0.0116072
3291.88	ML-22C	Ol-2	112.005	40.2999	0.0643	12.9688	0.3402	0.2028	46.7329	0.2196	100.828		0.995389	0.00125567	0.267882	0.00675876	0.0042427	1.72076	0.00581137	3.0021	86.5294		0.25	29.12	0.63	5.57	10.54	0.24	2.51		25-03-2013	30	15		+/- (%)		0.157151	634.213	1.22528	10.2198	4.41101	0.30287	92.9761
3291.88	ML-22C	Ol-2	120.005	40.2796	0.0789	12.8385	0.3323	0.1724	46.5818	0.2265	100.51		0.997134	0.00154426	0.26579	0.00661672	0.00361486	1.71907	0.00600751	2.99978	86.6092		0.25	24.84	0.64	5.69	12.27	0.24	2.44		25-03-2013	30	15		Accepted values		41.84		4.67	0.19	0.12	53.02
3291.88	ML-22C	Ol-2	128.005	40.2592	0.0729	13.0489	0.3408	0.1501	46.5919	0.2278	100.692		0.995857	0.00142572	0.269937	0.00678071	0.00314484	1.71811	0.00603731	3.00129	86.422		0.25	26.48	0.63	5.58	14.4	0.24	2.42		25-03-2013	30	15		Accuracy (%)		0.609656		-2.5221	-6.73926	-32.5377	-0.239495
3291.88	ML-22C	Ol-2	136.005	40.1981	0.0819	13.089	0.3485	0.1534	46.4307	0.2287	100.53		0.99618	0.00160469	0.271266	0.0069467	0.0032199	1.71532	0.00607233	3.00061	86.3451		0.25	23.35	0.63	5.39	13.51	0.24	2.4		25-03-2013	30	15		EMPA software calculated Precision (%)		0.211184	74.5633	0.464495	14.9097	6.76007	0.196197	4.84721
3291.88	ML-22C	Ol-2	144.005	40.249	0.0758	13.099	0.322	0.1644	46.9445	0.2166	101.071		0.992298	0.00147751	0.270073	0.00638537	0.003433	1.72536	0.0057214	3.00475	86.4654		0.25	25.35	0.63	5.83	12.86	0.24	2.52		25-03-2013	30	15
3291.88	ML-22C	Ol-2	152.005	40.2999	0.0401	13.2594	0.3394	0.1694	46.4408	0.2274	100.776		0.997054	0.000784394	0.274343	0.00675414	0.00354988	1.71286	0.00602785	3.00138	86.1945		0.25	49.57	0.63	5.49	12.66	0.24	2.42		25-03-2013	30	15		Olivine Standard: GeO2 MKII Olivine - Jeol PC-EPMA Interface
3291.88	ML-22C	Ol-2	160.005	39.9641	0.0701	13.1692	0.3468	0.1708	46.4911	0.2197	100.432		0.992441	0.00137635	0.273495	0.0069272	0.0035926	1.72113	0.00584551	3.00481	86.2884		0.25	28.59	0.63	5.43	12.57	0.24	2.5		25-03-2013	30	15		Session	Instution	SiO2	Cr2O3	FeO	NiO	MnO	MgO	CaO	Total
3291.88	ML-22C	Ol-2	168.005	40.2287	0.0425	13.1592	0.3387	0.1822	46.2494	0.2301	100.431		0.998335	0.000833882	0.273102	0.00676082	0.00382979	1.71102	0.00611807	3	86.2356		0.25	45.97	0.63	5.58	11.66	0.24	2.38		25-03-2013	30	15		Date		wt%	wt%	wt%	wt%	wt%	wt%	wt%	wt%
3291.88	ML-22C	Ol-2	176.005	40.249	0.0708	13.3496	0.3443	0.2142	46.3904	0.2271	100.845		0.995716	0.0013848	0.276188	0.00685111	0.00448833	1.71087	0.00601942	3.00151	86.1007		0.25	28.5	0.62	5.45	10	0.24	2.41		25-03-2013	30	15		17-03-2014	UoL	41.4046	-0.00767	4.8973	0.191354	0.136414	53.1035	0.019984	99.7455
3291.88	ML-22C	Ol-2	184.005	40.2796	0.0526	13.1592	0.3501	0.1553	46.1788	0.2286	100.404		0.999564	0.00103202	0.273093	0.00698814	0.00326425	1.70835	0.00607799	2.99837	86.2175		0.25	36.43	0.63	5.37	13.91	0.24	2.41		25-03-2013	30	15		17-03-2014	UoL	41.3364	-0.00751	4.84649	0.172946	0.139251	53.075	0.016212	99.5788
3291.88	ML-22C	Ol-2	192.005	40.2897	0.0451	13.3496	0.3011	0.1815	46.0781	0.2308	100.476		0.999837	0.000884884	0.27705	0.0060102	0.00381502	1.70466	0.0061366	2.99839	86.0196		0.25	41.14	0.63	6.2	11.68	0.25	2.38		25-03-2013	30	15		17-03-2014	UoL	41.2682	-0.0344	4.96761	0.201765	0.175646	53.0524	0.018735	99.65
3291.88	ML-22C	Ol-2	200.005	40.2592	0.0747	13.4198	0.3364	0.185	46.1486	0.2294	100.653		0.997823	0.00146381	0.278156	0.00670638	0.0038837	1.70512	0.00609171	2.99925	85.9749		0.25	27.22	0.62	5.62	11.49	0.25	2.41		25-03-2013	30	15		17-03-2014	UoL	41.308	-0.02711	4.90753	0.182475	0.151075	52.965	0.002703	99.4897
3291.88	ML-22C	Ol-2	208.005	40.2796	0.074	13.5099	0.3296	0.2015	46.2292	0.2294	100.853		0.996826	0.00144791	0.279605	0.00656094	0.00422372	1.70553	0.00608255	3.00028	85.9151		0.25	27.28	0.62	5.71	10.76	0.24	2.39		25-03-2013	30	15		Session mean (n=4)		41.3293	-0.0191725	4.90473	0.187135	0.150596	53.049	0.0144085
3291.88	ML-22C	Ol-2	216.005	39.9336	0.0521	13.3095	0.3192	0.1943	46.1386	0.2277	100.175		0.994806	0.00102616	0.27728	0.00639598	0.00409977	1.71346	0.00607745	3.00314	86.0715		0.25	38.16	0.63	5.85	11.21	0.25	2.42		25-03-2013	30	15		+/- (%)		0.139047	-71.4649	1.01321	6.58011	11.8634	0.112651	55.2439
3291.88	ML-22C	Ol-2	224.005	40.3508	0.0571	13.3496	0.3418	0.1718	46.1486	0.2287	100.648		0.999628	0.0011184	0.276573	0.00681086	0.00360492	1.70433	0.0060703	2.99814	86.038		0.25	34.71	0.62	5.51	12.37	0.25	2.42		25-03-2013	30	15		Accepted values		41.84		4.67	0.19	0.12	53.02
3291.88	ML-22C	Ol-2	232.005	40.0862	0.0409	13.3997	0.3086	0.1906	46.0177	0.2238	100.267		0.997626	0.00080477	0.278885	0.0061775	0.00401774	1.70729	0.00596748	3.00076	85.9587		0.25	46.52	0.62	6.11	11.33	0.25	2.45		25-03-2013	30	15		Accuracy (%)		1.2206		-5.02639	1.50789	-25.4971	-0.0546492
3291.88	ML-22C	Ol-2	240.005	40.1269	0.052	13.3596	0.3244	0.1713	46.8135	0.2173	101.065		0.990933	0.00101528	0.275904	0.00644367	0.00358304	1.72341	0.00574944	3.00704	86.2		0.25	38.02	0.62	5.78	12.34	0.24	2.51		25-03-2013	30	15		EMPA software calculated Precision (%)		0.210616	33.5308	0.500442	9.06618	9.81579	0.202874	4.95579
3291.88	ML-22C	Ol-2	248.005	40.1778	0.0428	13.3596	0.3233	0.173	46.1889	0.2265	100.492		0.997366	0.000840016	0.277344	0.00645533	0.00363748	1.70929	0.00602413	3.00095	86.0395		0.25	46.08	0.62	5.84	12.24	0.24	2.41		25-03-2013	30	15
3291.88	ML-22C	Ol-2	256.005	40.4017	0.0779	13.3997	0.3558	0.1862	46.2897	0.2313	100.942		0.998233	0.00152176	0.276875	0.00707102	0.00389671	1.705	0.00612302	2.99872	86.0297		0.25	25.59	0.62	5.33	11.34	0.24	2.39		25-03-2013	30	15		Olivine Standard: GeO2 MKII Olivine - Jeol PC-EPMA Interface
3291.88	ML-22C	Ol-2	264.005	40.0862	0.0652	13.55	0.3063	0.1892	46.3702	0.2255	100.793		0.993253	0.00127729	0.280777	0.00610458	0.00397074	1.71282	0.00598645	3.00419	85.9161		0.25	28.56	0.62	6.15	11.16	0.24	2.42		25-03-2013	30	15		Session	Instution	SiO2	Cr2O3	FeO	NiO	MnO	MgO	CaO	Total
3291.88	ML-22C	Ol-2	272.005	40.2592	0.0703	13.53	0.3108	0.1839	46.2796	0.223	100.857		0.996289	0.00137547	0.28001	0.0061865	0.00385467	1.70733	0.00591265	3.00096	85.9103		0.25	27.7	0.62	5.98	11.78	0.24	2.48		25-03-2013	30	15		Date		wt%	wt%	wt%	wt%	wt%	wt%	wt%	wt%
3291.88	ML-22C	Ol-2	280.005	40.6459	0.0525	13.4699	0.3398	0.159	46.2695	0.2225	101.159		1.00172	0.00102297	0.277619	0.00673592	0.00331904	1.69994	0.00587513	2.99623	85.9615		0.25	37.67	0.62	5.58	13.35	0.24	2.46		25-03-2013	30	15		18-03-2014	UoL	41.3611	0.01969	4.93197	0.201459	0.165343	52.9146	0.004063	99.5982
3291.88	ML-22C	Ol-2	288.005	40.4119	0.0651	13.4799	0.3168	0.1818	46.1083	0.2282	100.792		1.00004	0.00127369	0.278966	0.00630576	0.00381055	1.70097	0.00605036	2.99741	85.9104		0.25	30.67	0.62	5.89	11.71	0.25	2.42		25-03-2013	30	15		18-03-2014	UoL	41.2646	0.016708	4.94595	0.19205	0.142402	52.7821	-0.00464	99.3392
3291.88	ML-22C	Ol-2	296.005	40.188	0.0593	13.6302	0.3324	0.1769	46.2695	0.2268	100.883		0.995045	0.00116085	0.282231	0.0066199	0.00370988	1.70785	0.00601654	3.00263	85.8181		0.25	33.24	0.62	5.6	11.68	0.24	2.41		25-03-2013	30	15		18-03-2014	UoL	41.302	-0.00493	4.91409	0.219779	0.17968	52.9509	0.017011	99.5785
3291.88	ML-22C	Ol-2	304.005	40.0251	0.0794	13.4999	0.3347	0.1894	46.1083	0.2299	100.467		0.994778	0.00156023	0.280596	0.00669103	0.00398712	1.70837	0.00612195	3.0021	85.8924		0.25	24.19	0.62	5.62	11.35	0.25	2.39		25-03-2013	30	15		18-03-2014	UoL	41.2725	0.023209	4.91498	0.2144	0.150352	52.8004	-0.00197	99.3739
3291.88	ML-22C	Ol-2	312.005	40.4119	0.0777	13.4999	0.3225	0.1828	46.3501	0.2273	101.072		0.9975	0.00151635	0.278671	0.00640291	0.00382178	1.70555	0.0060112	2.99947	85.9556		0.25	25.72	0.62	5.8	11.96	0.24	2.42		25-03-2013	30	15		18-03-2014	UoL	41.0926	-0.01722	4.92625	0.199537	0.144929	53.1221	0.008247	99.4764
3291.88	ML-22C	Ol-2	320.005	40.3813	0.0556	13.5099	0.3188	0.1565	46.0983	0.2222	100.743		0.999901	0.00108849	0.27976	0.00634948	0.00328229	1.70165	0.00589492	2.99792	85.8807		0.25	33.35	0.62	5.9	14.05	0.25	2.48		25-03-2013	30	15		Session mean (n=5)		41.2586	0.0074914	4.92665	0.205445	0.156541	52.914	0.0045422
3291.88	ML-22C	Ol-2	328.005	40.3813	0.0455	13.4598	0.317	0.1811	45.9169	0.2264	100.528		1.00184	0.00089249	0.279262	0.00632586	0.00380558	1.69824	0.00601798	2.99638	85.878		0.25	42.72	0.62	5.88	11.79	0.25	2.43		25-03-2013	30	15		+/- (%)		0.242904	235.57	0.267533	5.52772	10.0292	0.258728	189.434
3291.88	ML-22C	Ol-2	336.005	41.0428	0.0663	13.2694	0.2987	0.1792	45.2319	0.2327	100.321		1.0171	0.00129902	0.275001	0.00595395	0.0037614	1.67101	0.00617846	2.9803	85.8685		0.25	30.3	0.63	6.22	11.84	0.25	2.35		25-03-2013	30	15		Accepted values		41.84		4.67	0.19	0.12	53.02
3291.88	ML-22C	Ol-2	344.005	40.1167	0.0671	13.4498	0.3135	0.1689	46.058	0.2267	100.401		0.99706	0.00131854	0.279556	0.00626725	0.00355558	1.70651	0.00603677	3.0003	85.9242		0.25	29.68	0.62	6	12.72	0.25	2.43		25-03-2013	30	15		Accuracy (%)		1.38967		-5.49567	-8.12895	-30.451	0.199887
3291.88	ML-22C	Ol-2	352.005	40.2897	0.08	13.4598	0.3418	0.181	46.1285	0.2255	100.706		0.998123	0.00156695	0.27886	0.00681092	0.00379799	1.7036	0.00598541	2.99874	85.9336		0.25	24.5	0.62	5.52	11.87	0.25	2.42		25-03-2013	30	15		EMPA software calculated Precision (%)		0.210303	28.7191	0.496274	23.7762	7.36536	0.196966	4.85534
3291.88	ML-22C	Ol-2	360.005	40.2083	0.0673	13.3797	0.3182	0.1888	46.1386	0.2262	100.527		0.997692	0.00132029	0.27764	0.00635074	0.00396797	1.70668	0.00601355	2.99967	86.0083		0.25	29.04	0.62	5.95	11.03	0.25	2.43		25-03-2013	30	15
3291.88	ML-22C	Ol-2	368.005	40.2287	0.0631	13.4598	0.3362	0.2007	46.1788	0.2263	100.694		0.997068	0.0012365	0.278988	0.0067024	0.0042133	1.70624	0.0060094	3.00046	85.9468		0.25	31.44	0.62	5.58	10.67	0.24	2.42		25-03-2013	30	15		Olivine Standard: GeO2 MKII Olivine - Jeol PC-EPMA Interface
3291.88	ML-22C	Ol-2	376.005	40.1269	0.0561	13.53	0.3479	0.1409	46.6624	0.2251	101.089		0.991371	0.00109582	0.279547	0.00691351	0.00294847	1.7186	0.00595845	3.00644	86.0097		0.25	35.16	0.62	5.39	14.49	0.25	2.42		25-03-2013	30	15		Session	Instution	SiO2	Cr2O3	FeO	NiO	MnO	MgO	CaO	Total
3291.88	ML-22C	Ol-2	384.005	40.2287	0.0774	13.3296	0.3077	0.2177	46.0479	0.2256	100.435		0.998798	0.00151935	0.276767	0.00614488	0.00457811	1.70436	0.00600121	2.99816	86.0298		0.25	25.05	0.62	6.06	9.88	0.25	2.43		25-03-2013	30	15		Date		wt%	wt%	wt%	wt%	wt%	wt%	wt%	wt%
3291.88	ML-22C	Ol-2	392.005	40.3915	0.0844	13.4298	0.3191	0.1575	46.1587	0.2249	100.766		0.999437	0.00165114	0.277901	0.00635091	0.00330089	1.70266	0.00596228	2.99726	85.9686		0.25	22.57	0.62	5.9	13.77	0.25	2.44		25-03-2013	30	15		28-03-2014	UoL	41.9421	0.012181	4.81728	0.188536	0.155776	53.2053	0.014308	100.335
3291.88	ML-22C	Ol-2	400.005	40.4322	0.0602	13.4398	0.3308	0.2187	46.3098	0.2235	101.015		0.998484	0.0011754	0.277563	0.00657087	0.00457454	1.70488	0.00591355	2.99917	85.999		0.25	32.21	0.62	5.64	9.91	0.24	2.45		25-03-2013	30	15		28-03-2014	UoL	41.9336	0.009346	4.87155	0.161856	0.150015	53.1568	0.001695	100.285
3291.88	ML-22C	Ol-2	408.005	40.2185	0.061	13.3095	0.3317	0.2068	46.0076	0.2211	100.356		0.999357	0.00119839	0.276575	0.00662955	0.00435242	1.70425	0.00588628	2.99825	86.0374		0.25	32.31	0.63	5.68	10.59	0.25	2.48		25-03-2013	30	15		28-03-2014	UoL	41.9956	0.007871	4.87016	0.223554	0.147945	53.2012	0.020014	100.466
3291.88	ML-22C	Ol-2	416.005	40.2185	0.0603	13.3797	0.3281	0.1444	45.9472	0.2271	100.305		0.999869	0.00118525	0.278175	0.00656096	0.00304067	1.70288	0.00604912	2.99776	85.9582		0.25	32.62	0.62	5.69	14.42	0.25	2.41		25-03-2013	30	15		28-03-2014	UoL	41.6271	-0.01743	4.84263	0.204792	0.175702	53.178	0.018396	100.029
3291.88	ML-22C	Ol-2	424.005	40.1371	0.0589	13.3396	0.3543	0.1792	46.1889	0.2237	100.482		0.996559	0.00115624	0.276984	0.00707574	0.00376861	1.70963	0.00595087	3.00113	86.0575		0.25	31.76	0.62	5.35	11.68	0.24	2.44		25-03-2013	30	15		28-03-2014	UoL	41.9048	-0.02596	4.85816	0.190872	0.16232	53.3048	0.016213	100.411
3291.88	ML-22C	Ol-2	432.005	40.188	0.0552	13.4198	0.3095	0.151	46.2091	0.2234	100.556		0.997019	0.00108273	0.278425	0.00617606	0.003173	1.709	0.00593811	3.00082	85.9907		0.25	35.98	0.62	6.03	14.14	0.24	2.46		25-03-2013	30	15		Session mean (n=5)		41.8806	-0.0027984	4.85196	0.193922	0.158352	53.2092	0.0141252
3291.88	ML-22C	Ol-2	440.005	40.2999	0.0532	13.3296	0.319	0.1518	46.0378	0.2343	100.426		1.00036	0.0010441	0.27671	0.00636925	0.00319162	1.70364	0.00623137	2.99755	86.0272		0.25	36.24	0.62	5.83	14.25	0.25	2.36		25-03-2013	30	15		+/- (%)		0.347381	-628.222	0.46581	11.7103	7.06902	0.106884	51.518
3291.88	ML-22C	Ol-2	448.005	40.4526	0.067	13.4198	0.3211	0.2019	46.5818	0.2231	101.267		0.996384	0.00130476	0.276427	0.00636157	0.00421214	1.71043	0.00588759	3.00101	86.0872		0.25	28.95	0.62	5.85	10.31	0.24	2.45		25-03-2013	30	15		Accepted values		41.84		4.67	0.19	0.12	53.02
3291.88	ML-22C	Ol-2	456.005	40.4831	0.0684	13.54	0.3192	0.1735	46.2695	0.2187	101.072		0.999171	0.00133474	0.279474	0.00633684	0.00362703	1.70243	0.00578326	2.99816	85.8987		0.25	28.42	0.62	5.88	12.48	0.24	2.51		25-03-2013	30	15		Accuracy (%)		-0.0971319		-3.89627	-2.06421	-31.9597	-0.356884
3291.88	ML-22C	Ol-2	464.005	40.2897	0.1053	13.3997	0.3331	0.1781	46.2191	0.2301	100.755		0.997256	0.00206071	0.277373	0.00663179	0.00373389	1.70546	0.0061022	2.99862	86.0113		0.25	19.18	0.62	5.6	12.15	0.24	2.38		25-03-2013	30	15		EMPA software calculated Precision (%)		0.211245	48.024	0.450208	8.32794	6.61875	0.180563	4.88865
3291.88	ML-22C	Ol-2	472.005	40.2999	0.0709	13.3195	0.3191	0.1979	46.0983	0.2197	100.525		0.999451	0.00139021	0.27625	0.00636543	0.00415708	1.70432	0.00583774	2.99777	86.052		0.25	27.58	0.62	5.9	10.59	0.25	2.48		25-03-2013	30	15
3291.88	ML-22C	Ol-2	480.005	40.1167	0.0555	13.4799	0.3228	0.187	46.1083	0.229	100.499		0.996453	0.00108993	0.28001	0.00644924	0.00393422	1.70734	0.00609431	3.00137	85.9104		0.25	34.82	0.62	5.78	11.38	0.25	2.4		25-03-2013	30	15		ALL (n=172)	Instution	SiO2	Cr2O3	FeO	NiO	MnO	MgO	CaO
3291.88	ML-22C	Ol-2	488.005	40.4526	0.086	13.4598	0.3041	0.1864	46.1889	0.2329	100.911		0.999605	0.00168018	0.27815	0.00604425	0.00390134	1.70149	0.00616609	2.99703	85.9495		0.25	22.37	0.62	6.2	11.35	0.24	2.37		25-03-2013	30	15				wt%	wt%	wt%	wt%	wt%	wt%	wt%
3291.88	ML-22C	Ol-2	496.005	40.422	0.064	13.3797	0.3227	0.1932	46.199	0.2277	100.808		0.999778	0.00125153	0.276749	0.0064199	0.00404742	1.70344	0.00603401	2.99772	86.0241		0.25	31.56	0.62	5.88	11.24	0.24	2.4		25-03-2013	30	15		Longterm mean (n=172	UoL	41.3835	0.00575613	4.91339	0.204937	0.151335	52.7823	0.0105206
3291.88	ML-22C	Ol-2	504.005	40.3406	0.0796	13.3496	0.3256	0.1669	46.1386	0.2301	100.631		0.999361	0.00155908	0.276569	0.00648796	0.00350205	1.70393	0.00610737	2.99752	86.0354		0.25	24.91	0.62	5.74	12.83	0.24	2.38		25-03-2013	30	15		+/- (%)	UoL	1.15668	206.911	1.98301	7.12797	11.7191	0.881987	52.5776
3291.88	ML-22C	Ol-2	512.005	40.2897	0.0678	13.4699	0.34	0.1819	46.199	0.2258	100.774		0.997603	0.0013273	0.278922	0.00677152	0.00381489	1.70531	0.00599025	2.99974	85.9431		0.25	29.77	0.62	5.5	11.73	0.24	2.42		25-03-2013	30	15		Accepted values	UoL	41.84		4.67	0.19	0.12	53.02
3291.88	ML-22C	Ol-2	520.005	40.3203	0.0353	13.53	0.3415	0.1893	46.3803	0.229	101.026		0.996413	0.000689709	0.279621	0.00678814	0.00396234	1.70867	0.0060633	3.00221	85.9366		0.25	53.55	0.62	5.57	11.29	0.24	2.41		25-03-2013	30	15		Accuracy (%)	UoL	1.09118		-5.21181	-7.86169	-26.1122	0.448363
3291.88	ML-22C	Ol-2	528.005	40.2796	0.0699	13.3797	0.3347	0.1587	46.2796	0.2253	100.727		0.997321	0.00136837	0.277046	0.00666576	0.00332823	1.70824	0.0059768	2.99994	86.045		0.25	28.38	0.62	5.67	13.39	0.24	2.44		25-03-2013	30	15		EMPA software calculated Precision (%)	UoL	0.199274	39.1848	0.471874	8.72064	8.79186	0.20776	2.75304
3291.88	ML-22C	Ol-2	536.005	40.3406	0.0669	13.5099	0.3499	0.1857	46.0277	0.2206	100.701		0.999584	0.00131062	0.279954	0.00697372	0.00389739	1.70022	0.00585652	2.99779	85.8622		0.25	29.42	0.62	5.33	11.37	0.25	2.46		25-03-2013	30	15
3291.88	ML-22C	Ol-3	0	39.3229	0.0877	18.2204	0.2069	0.2244	42.5019	0.2774	100.842		0.994855	0.00175424	0.385503	0.00421035	0.00480864	1.60299	0.0075193	3.00164	80.6133		0.26	22.94	0.53	8.48	10.26	0.26	2.09		25-03-2013	30	15
3291.88	ML-22C	Ol-3	7.00889	40.1574	0.0794	13.2494	0.3484	0.17	46.4911	0.2559	100.752		0.994063	0.00155397	0.274283	0.00693697	0.00356437	1.71564	0.00678697	3.00283	86.2164		0.25	25.02	0.63	5.38	12.96	0.24	2.22		25-03-2013	30	15
3291.88	ML-22C	Ol-3	14.0089	40.2083	0.0395	13.4398	0.2923	0.1698	46.4106	0.2455	100.806		0.995385	0.000773121	0.278243	0.00582033	0.0035604	1.71278	0.00651155	3.00307	86.0251		0.25	47.3	0.62	6.32	12.7	0.24	2.29		25-03-2013	30	15
3291.88	ML-22C	Ol-3	21.0089	40.0964	0.0291	13.8006	0.3158	0.19	46.1386	0.2493	100.82		0.994536	0.000570668	0.286266	0.00630044	0.00399167	1.70603	0.00662514	3.00432	85.6314		0.25	68.8	0.61	5.94	11.37	0.25	2.27		25-03-2013	30	15
3291.88	ML-22C	Ol-3	28.0089	40.015	0.0484	13.8708	0.2879	0.204	45.9371	0.2508	100.614		0.994785	0.000951322	0.288378	0.00575695	0.00429559	1.70247	0.00668023	3.00331	85.5148		0.25	40.09	0.61	6.45	10.73	0.25	2.27		25-03-2013	30	15
3291.88	ML-22C	Ol-3	35.0089	39.9234	0.0326	14.3017	0.3166	0.1945	45.5946	0.2517	100.615		0.994701	0.000642182	0.297995	0.00634483	0.0041046	1.69351	0.00671903	3.00401	85.0367		0.25	59.13	0.6	5.9	11.1	0.25	2.24		25-03-2013	30	15
3291.88	ML-22C	Ol-3	42.0089	40.015	0.0427	14.4621	0.3385	0.1943	45.655	0.2587	100.966		0.994158	0.000838757	0.300483	0.00676449	0.00408876	1.69095	0.00688631	3.00416	84.9112		0.25	43.83	0.6	5.59	11.07	0.25	2.19		25-03-2013	30	15
3291.88	ML-22C	Ol-3	49.0089	40.0862	0.0219	14.6725	0.3042	0.2479	45.5442	0.2406	101.118		0.995295	0.000429909	0.304662	0.00607519	0.00521338	1.68577	0.00640044	3.00385	84.6937		0.25	85.36	0.59	6.13	9.05	0.25	2.31		25-03-2013	30	15
3291.88	ML-22C	Ol-3	56.0089	40.0658	0.0235	14.5923	0.3191	0.1861	45.0103	0.2545	100.452		1.00054	0.000463983	0.304747	0.00640958	0.00393632	1.67563	0.00680932	2.99854	84.6117		0.25	82.52	0.6	5.89	11.62	0.25	2.21		25-03-2013	30	15
3291.88	ML-22C	Ol-3	63.0089	39.1601	0.0293	14.7728	0.2898	0.2139	44.4461	0.2499	99.1619		0.993378	0.000587643	0.313392	0.00591307	0.00459586	1.68079	0.00679195	3.00545	84.2847		0.26	63.43	0.59	6.45	10.2	0.25	2.25		25-03-2013	30	15
3291.88	ML-22C	Ol-3	70.0089	39.9132	0.062	14.7728	0.2941	0.2118	45.2621	0.248	100.764		0.994818	0.00122178	0.307925	0.00589611	0.00447135	1.68178	0.00662272	3.00274	84.5241		0.25	30.78	0.59	6.36	10.36	0.25	2.27		25-03-2013	30	15
3291.88	ML-22C	Ol-3	77.0089	40.0557	0.026	14.9832	0.2968	0.2091	45.0103	0.2483	100.829		0.998367	0.000512359	0.312311	0.00595023	0.00441434	1.67242	0.00663072	3.00061	84.2643		0.25	72.11	0.59	6.3	10.33	0.25	2.25		25-03-2013	30	15
3291.88	ML-22C	Ol-3	84.0089	39.9946	0.0438	14.9832	0.3215	0.2207	45.1211	0.2503	100.935		0.996118	0.000862499	0.312083	0.00644071	0.00465583	1.67532	0.00667925	3.00216	84.2969		0.25	42.39	0.59	5.88	9.96	0.25	2.24		25-03-2013	30	15
3291.88	ML-22C	Ol-3	91.0089	39.903	0.0454	15.0033	0.3146	0.2019	44.9297	0.2426	100.64		0.996801	0.000896673	0.313433	0.00632129	0.00427194	1.67319	0.00649309	3.00141	84.2228		0.25	42.27	0.59	5.88	10.78	0.25	2.33		25-03-2013	30	15
3291.88	ML-22C	Ol-3	98.0089	39.9539	0.0506	15.1436	0.3203	0.1902	45.1009	0.2525	101.012		0.995015	0.000996314	0.315395	0.0064161	0.00401205	1.67442	0.00673735	3.00299	84.1495		0.25	35.73	0.59	5.84	11.51	0.25	2.25		25-03-2013	30	15
3291.88	ML-22C	Ol-3	105.009	39.842	0.0182	15.1536	0.2982	0.2221	44.9498	0.2501	100.734		0.995394	0.000359502	0.316611	0.00599247	0.0046999	1.67414	0.00669461	3.00389	84.0959		0.25	101.08	0.59	6.32	9.94	0.25	2.25		25-03-2013	30	15
3291.88	ML-22C	Ol-3	112.009	39.8929	0.0673	15.0634	0.2846	0.2087	44.8592	0.2478	100.624		0.996772	0.00132951	0.31476	0.00571978	0.00441681	1.67094	0.00663376	3.00057	84.1486		0.25	29.33	0.59	6.48	10.46	0.25	2.27		25-03-2013	30	15
3291.88	ML-22C	Ol-3	119.009	39.8216	0.06	15.0734	0.32	0.1852	44.9196	0.2425	100.622		0.995355	0.00118573	0.315084	0.00643358	0.0039209	1.6738	0.00649424	3.00227	84.1577		0.25	31.97	0.59	5.92	11.59	0.25	2.32		25-03-2013	30	15
3291.88	ML-22C	Ol-3	126.009	39.8216	0.0227	15.1235	0.3236	0.2106	45.1513	0.2494	100.903		0.993302	0.000447676	0.31548	0.00649255	0.00444945	1.67896	0.00666526	3.0058	84.1821		0.25	82.61	0.59	5.79	10.71	0.25	2.27		25-03-2013	30	15
3291.88	ML-22C	Ol-3	133.009	39.8114	0.0339	15.1436	0.3333	0.204	45.0808	0.2526	100.86		0.993523	0.000668875	0.316049	0.00669036	0.00431207	1.67714	0.006754	3.00514	84.1436		0.25	56.98	0.59	5.74	10.92	0.25	2.23		25-03-2013	30	15
3291.88	ML-22C	Ol-3	140.009	39.8318	0.0268	15.1135	0.3204	0.1842	45.0002	0.2444	100.721		0.995007	0.000529306	0.315731	0.00643773	0.00389737	1.67579	0.00654117	3.00393	84.1462		0.25	71.59	0.59	5.86	11.71	0.25	2.31		25-03-2013	30	15
3291.88	ML-22C	Ol-3	147.009	40.0964	0.0124	15.0133	0.3056	0.1962	44.9095	0.257	100.79		0.99982	0.000244463	0.313075	0.00612934	0.00414382	1.66941	0.00686606	2.99969	84.208		0.25	155.11	0.59	6.12	11.06	0.25	2.22		25-03-2013	30	15
3291.88	ML-22C	Ol-3	154.009	40.1473	0.047	15.1736	0.3254	0.2026	44.9599	0.248	101.104		0.998569	0.000924263	0.315623	0.00651004	0.00426823	1.66708	0.00660894	2.99958	84.0812		0.25	41.22	0.58	5.75	11.05	0.25	2.27		25-03-2013	30	15
3291.88	ML-22C	Ol-3	161.009	39.8623	0.0479	15.1235	0.2994	0.1761	44.839	0.2531	100.601		0.996612	0.000946835	0.316208	0.00602087	0.00372914	1.6712	0.00677974	3.00149	84.0894		0.25	38.99	0.59	6.24	12.12	0.25	2.22		25-03-2013	30	15
3291.88	ML-22C	Ol-3	168.009	39.9743	0.0344	15.1937	0.3066	0.2019	44.9599	0.2517	100.922		0.996564	0.000678045	0.31677	0.0061481	0.00426331	1.67093	0.00672304	3.00208	84.0635		0.25	56.79	0.58	6.14	10.95	0.25	2.25		25-03-2013	30	15
3291.88	ML-22C	Ol-3	175.009	40.015	0.0577	15.1135	0.3075	0.1885	44.8692	0.2518	100.803		0.998052	0.00113784	0.315248	0.00616907	0.00398224	1.66835	0.0067289	2.99967	84.1073		0.25	32.01	0.59	6.18	11.77	0.25	2.24		25-03-2013	30	15
3291.88	ML-22C	Ol-3	182.009	40.015	0.0493	15.1235	0.3224	0.1879	44.9901	0.2486	100.937		0.996954	0.000971124	0.31511	0.00646088	0.0039652	1.67101	0.00663608	3.0011	84.1344		0.25	38.59	0.59	5.84	11.4	0.25	2.28		25-03-2013	30	15
3291.88	ML-22C	Ol-3	189.009	40.2185	0.0573	15.1937	0.3234	0.1853	44.9398	0.2387	101.157		0.999549	0.00112592	0.315789	0.00646491	0.00390067	1.66501	0.00635606	2.9982	84.0575		0.25	32.92	0.58	5.77	11.89	0.25	2.36		25-03-2013	30	15
3291.88	ML-22C	Ol-3	196.009	39.8929	0.0269	15.1636	0.3315	0.2253	45.0707	0.2445	100.955		0.994587	0.000530244	0.31616	0.00664776	0.00475767	1.67514	0.00653107	3.00435	84.1229		0.25	68.78	0.58	5.7	9.67	0.25	2.3		25-03-2013	30	15
3291.88	ML-22C	Ol-3	203.009	40.0557	0.0423	15.1336	0.3068	0.218	44.9398	0.2419	100.938		0.997944	0.000833216	0.315311	0.00614811	0.00460028	1.6691	0.00645707	3.00039	84.1106		0.25	45.61	0.59	6.05	9.9	0.25	2.33		25-03-2013	30	15
3291.88	ML-22C	Ol-3	210.009	40.015	0.0322	15.1536	0.3011	0.2099	44.8793	0.2431	100.834		0.998104	0.000635016	0.3161	0.00604099	0.00443457	1.66881	0.00649675	3.00063	84.0749		0.25	57.66	0.59	6.26	10.85	0.25	2.31		25-03-2013	30	15
3291.88	ML-22C	Ol-3	217.009	40.0455	0.0357	15.1135	0.345	0.2035	44.7987	0.2443	100.786		0.999197	0.000704273	0.315369	0.00692405	0.00430078	1.66637	0.00653098	2.99939	84.0863		0.25	51.24	0.59	5.51	10.89	0.25	2.29		25-03-2013	30	15
3291.88	ML-22C	Ol-3	224.009	39.9743	0.053	15.2137	0.3056	0.22	45.0304	0.2568	101.054		0.995411	0.00104345	0.316821	0.00612095	0.00464013	1.67162	0.00685132	3.0025	84.0668		0.25	34.63	0.58	6.17	10.18	0.25	2.19		25-03-2013	30	15
3291.88	ML-22C	Ol-3	231.009	39.8114	0.0367	15.0935	0.3212	0.1838	44.8894	0.2475	100.583		0.995715	0.000725719	0.315698	0.0064617	0.00389366	1.67371	0.00663224	3.00283	84.131		0.25	53.02	0.59	5.84	12.08	0.25	2.27		25-03-2013	30	15
3291.88	ML-22C	Ol-3	238.009	40.0455	0.0451	15.1235	0.3152	0.1799	44.9196	0.252	100.881		0.998106	0.00088874	0.315233	0.00631907	0.00379787	1.66904	0.00672947	3.00012	84.1134		0.25	40.72	0.59	5.97	12.01	0.25	2.24		25-03-2013	30	15
3291.88	ML-22C	Ol-3	245.009	39.9641	0.0146	15.1336	0.3153	0.2087	44.8995	0.2442	100.78		0.997573	0.00028814	0.315916	0.00633057	0.00441248	1.6708	0.00653098	3.00185	84.0986		0.25	127.98	0.59	5.93	10.32	0.25	2.29		25-03-2013	30	15
3291.88	ML-22C	Ol-3	252.009	40.1066	0.048	15.2438	0.3237	0.2051	44.8692	0.2536	101.05		0.998481	0.000944802	0.317376	0.00648203	0.0043249	1.66526	0.00676443	2.99963	83.9922		0.25	39.18	0.58	5.83	10.38	0.25	2.23		25-03-2013	30	15
3291.88	ML-22C	Ol-3	259.009	40.0353	0.0253	15.1736	0.3036	0.2029	44.9398	0.2359	100.916		0.997867	0.000498569	0.316283	0.00608661	0.00428349	1.66982	0.00629963	3.00114	84.0752		0.25	79.03	0.59	6.18	10.9	0.25	2.37		25-03-2013	30	15
3291.88	ML-22C	Ol-3	266.009	39.8216	0.0439	15.2037	0.3404	0.2274	45.0204	0.2409	100.898		0.99367	0.00086609	0.31727	0.00683214	0.00480617	1.67471	0.00644047	3.0046	84.0727		0.25	42.67	0.58	5.61	9.92	0.25	2.31		25-03-2013	30	15
3291.88	ML-22C	Ol-3	273.009	39.903	0.0284	15.1837	0.3023	0.2119	44.9297	0.2498	100.809		0.996075	0.000560505	0.31697	0.00606971	0.00448026	1.67197	0.00668092	3.0028	84.0633		0.25	65.69	0.58	6.25	10.34	0.25	2.26		25-03-2013	30	15
3291.88	ML-22C	Ol-3	280.009	39.9844	0.0477	15.1937	0.3096	0.2057	44.8793	0.2303	100.851		0.99735	0.000940698	0.316939	0.00621157	0.00434587	1.66883	0.00615472	3.00077	84.0395		0.25	40.72	0.58	6.09	10.96	0.25	2.42		25-03-2013	30	15
3291.88	ML-22C	Ol-3	287.009	40.0048	0.0419	15.2538	0.342	0.2178	45.0506	0.2492	101.16		0.995442	0.000824315	0.317423	0.00684501	0.00459037	1.67114	0.0066437	3.00291	84.0376		0.25	45.44	0.58	5.58	10.16	0.25	2.26		25-03-2013	30	15
3291.88	ML-22C	Ol-3	294.009	39.8725	0.0596	15.2137	0.3015	0.2152	44.698	0.2409	100.601		0.997271	0.00117859	0.318223	0.00606556	0.00455898	1.66662	0.00645557	3.00037	83.9673		0.25	32.72	0.58	6.15	10.11	0.25	2.33		25-03-2013	30	15
3291.88	ML-22C	Ol-3	301.009	39.73	0.0395	15.1436	0.3186	0.1664	45.4233	0.2477	101.069		0.989564	0.000777853	0.315435	0.00638285	0.00351046	1.6866	0.00661011	3.00888	84.2443		0.25	44.93	0.58	5.85	13.27	0.25	2.27		25-03-2013	30	15
3291.88	ML-22C	Ol-3	308.009	39.6384	0.0473	15.1837	0.2974	0.1835	44.6375	0.2497	100.238		0.995358	0.000939073	0.318857	0.00600686	0.00390288	1.67098	0.00671799	3.00276	83.9757		0.25	39.12	0.58	6.26	11.79	0.25	2.26		25-03-2013	30	15
3291.88	ML-22C	Ol-3	315.009	39.5876	0.0271	15.1536	0.3123	0.2145	44.3857	0.2399	99.9206		0.997352	0.000539802	0.319273	0.00632857	0.00457723	1.66702	0.00647557	3.00157	83.9262		0.25	69	0.58	5.96	10.08	0.25	2.31		25-03-2013	30	15
3291.88	ML-22C	Ol-3	322.009	39.557	0.0397	15.0033	0.3167	0.2129	44.154	0.2504	99.534		0.999661	0.000793223	0.317082	0.00643756	0.00455712	1.66344	0.00677987	2.99875	83.99		0.25	47.36	0.58	5.89	10.15	0.25	2.22		25-03-2013	30	15
3291.88	ML-22C	Ol-3	329.009	39.5061	0.0597	15.0434	0.3041	0.1941	44.2648	0.2397	99.6119		0.997701	0.00119203	0.317714	0.00617727	0.0041519	1.66649	0.00648577	2.99991	83.9878		0.25	31.42	0.58	6.14	10.86	0.25	2.31		25-03-2013	30	15
3291.88	ML-22C	Ol-3	336.009	39.6588	0.0319	15.2538	0.3129	0.2016	44.6577	0.2532	100.37		0.995092	0.000632834	0.32008	0.006315	0.0042845	1.67043	0.00680683	3.00364	83.9197		0.25	59.17	0.58	5.97	10.81	0.25	2.22		25-03-2013	30	15
3291.88	ML-22C	Ol-3	343.009	39.8013	0.0361	15.2037	0.3321	0.2488	44.7685	0.2518	100.642		0.995718	0.000714039	0.318086	0.00668271	0.005272	1.66963	0.00674921	3.00285	83.9974		0.25	52.44	0.58	5.67	8.76	0.25	2.22		25-03-2013	30	15
3291.88	ML-22C	Ol-3	350.009	39.4247	0.021	15.2137	0.3114	0.1845	44.5469	0.2406	99.9428		0.993719	0.000418494	0.320691	0.00631331	0.00393892	1.67387	0.00649753	3.00544	83.9217		0.26	90.5	0.58	5.97	11.81	0.25	2.32		25-03-2013	30	15
3291.88	ML-22C	Ol-3	357.009	39.5977	0.0408	15.2238	0.2971	0.2268	44.2749	0.2555	99.9166		0.997852	0.00081289	0.320829	0.00602202	0.00484089	1.66327	0.00689834	3.00052	83.83		0.25	46.49	0.58	6.27	9.93	0.25	2.19		25-03-2013	30	15
3291.88	ML-22C	Ol-5	0	39.6893	0.0412	16.1358	0.2208	0.2248	44.0734	0.2622	100.647		0.996453	0.000817816	0.338789	0.00445888	0.00478041	1.64956	0.00705299	3.00191	82.9613		0.26	49.41	0.57	8.15	10.08	0.25	2.18		25-03-2013	30	15
3291.88	ML-22C	Ol-5	4.966	40.3304	0.0421	13.2093	0.331	0.1911	46.5717	0.2499	100.926		0.996239	0.00082222	0.272876	0.00657662	0.00399831	1.71499	0.00661385	3.00212	86.2729		0.25	46.03	0.63	5.66	10.9	0.24	2.26		25-03-2013	30	15
3291.88	ML-22C	Ol-5	9.966	40.3508	0.0787	13.1091	0.3132	0.1547	46.612	0.2444	100.863		0.996417	0.00153652	0.270718	0.00622092	0.00323568	1.71591	0.00646618	3.00051	86.373		0.25	24.94	0.63	6.05	13.9	0.24	2.31		25-03-2013	30	15
3291.88	ML-22C	Ol-5	14.966	40.249	0.0307	13.1291	0.3111	0.1717	46.612	0.2375	100.741		0.99572	0.000600476	0.271627	0.0061905	0.00359781	1.71905	0.0062951	3.00308	86.355		0.25	63.18	0.63	6.1	12.26	0.24	2.35		25-03-2013	30	15
3291.88	ML-22C	Ol-5	19.966	40.2999	0.0449	13.2594	0.3176	0.1777	46.3904	0.2456	100.736		0.997392	0.000878584	0.274436	0.00632246	0.00372507	1.71158	0.0065125	3.00085	86.1816		0.25	43.09	0.63	5.86	12.41	0.24	2.29		25-03-2013	30	15
3291.88	ML-22C	Ol-5	24.966	40.1269	0.0374	13.4298	0.3269	0.2073	46.4206	0.2469	100.796		0.993985	0.000732472	0.278208	0.00651333	0.0043494	1.71421	0.00655274	3.00455	86.0367		0.25	52.95	0.62	5.72	10.74	0.24	2.28		25-03-2013	30	15
3291.88	ML-22C	Ol-5	29.966	40.1066	0.036	13.6001	0.3386	0.1595	46.4911	0.2483	100.98		0.992412	0.000704295	0.281434	0.00673918	0.0033429	1.71496	0.0065828	3.00618	85.9029		0.25	56.14	0.62	5.55	13.33	0.24	2.27		25-03-2013	30	15
3291.88	ML-22C	Ol-5	34.966	40.0964	0.0693	13.6102	0.2986	0.1952	46.1788	0.2463	100.695		0.994637	0.00135915	0.282344	0.0059579	0.00410133	1.7077	0.00654608	3.00264	85.8121		0.25	26.85	0.62	6.32	11.29	0.25	2.29		25-03-2013	30	15
3291.88	ML-22C	Ol-5	39.966	40.1371	0.0489	13.55	0.3204	0.1798	46.2897	0.254	100.78		0.994656	0.000958101	0.280817	0.00638651	0.003774	1.71009	0.00674401	3.00343	85.895		0.25	37.8	0.62	5.83	11.88	0.25	2.21		25-03-2013	30	15
3291.88	ML-22C	Ol-5	44.966	40.1066	0.0444	13.6603	0.3265	0.2006	46.1788	0.2423	100.76		0.99473	0.000870659	0.283338	0.00651353	0.00421411	1.70742	0.00643874	3.00353	85.7673		0.25	42.31	0.62	5.76	10.67	0.25	2.31		25-03-2013	30	15
3291.88	ML-22C	Ol-5	49.966	40.1574	0.0931	13.7705	0.311	0.2196	46.0882	0.2513	100.891		0.994835	0.00182352	0.285293	0.00619711	0.0046079	1.70209	0.00667014	3.00152	85.6448		0.25	20.97	0.62	6.03	10.06	0.25	2.22		25-03-2013	30	15
3291.88	ML-22C	Ol-5	54.966	40.1269	0.0347	13.6302	0.3027	0.2034	46.1184	0.244	100.66		0.995929	0.000680922	0.282912	0.00604295	0.00427592	1.70638	0.00648844	3.00271	85.7782		0.25	54.57	0.62	6.24	10.53	0.25	2.3		25-03-2013	30	15
3291.88	ML-22C	Ol-5	59.966	40.0557	0.0331	13.8106	0.319	0.2239	46.0479	0.2507	100.741		0.994549	0.000649779	0.286768	0.00637084	0.00470871	1.70444	0.00666921	3.00415	85.5982		0.25	58.21	0.61	5.87	9.96	0.25	2.24		25-03-2013	30	15
3291.88	ML-22C	Ol-5	64.966	39.9234	0.0391	13.8006	0.3007	0.1697	46.1587	0.2536	100.646		0.992195	0.000768284	0.286829	0.006011	0.00357221	1.71014	0.00675269	3.00627	85.6368		0.25	48.65	0.62	6.25	12.5	0.25	2.22		25-03-2013	30	15
3291.88	ML-22C	Ol-5	69.966	40.0862	0.0313	13.7405	0.3442	0.2149	46.1587	0.2514	100.827		0.994217	0.00061377	0.284999	0.00686659	0.00451449	1.70666	0.0066805	3.00456	85.6904		0.25	63.31	0.62	5.51	10.03	0.25	2.25		25-03-2013	30	15
3291.88	ML-22C	Ol-5	74.966	40.076	0.0636	13.8507	0.332	0.1548	45.8867	0.2489	100.613		0.995943	0.00124963	0.287858	0.00663639	0.00325842	1.69999	0.00662723	3.00156	85.5191		0.25	30.95	0.61	5.67	13.68	0.25	2.28		25-03-2013	30	15
3291.88	ML-22C	Ol-5	79.966	39.9336	0.0483	13.9209	0.3159	0.1909	45.9774	0.2474	100.634		0.99309	0.000949671	0.289516	0.00631894	0.00402107	1.70452	0.00659186	3.00501	85.4809		0.25	40.23	0.61	5.94	11.19	0.25	2.27		25-03-2013	30	15
3291.88	ML-22C	Ol-5	84.966	40.076	0.058	13.7605	0.3361	0.2148	45.7356	0.2486	100.43		0.997555	0.00114145	0.286446	0.00672922	0.00452869	1.69713	0.00662996	3.00016	85.5591		0.25	34.31	0.62	5.54	10.32	0.25	2.26		25-03-2013	30	15
3291.88	ML-22C	Ol-5	89.966	40.015	0.0748	13.991	0.3078	0.1722	45.8363	0.2423	100.639		0.994828	0.00147029	0.290891	0.00615514	0.00362614	1.69881	0.00645411	3.00223	85.3801		0.25	25.96	0.61	6.07	12.14	0.25	2.31		25-03-2013	30	15
3291.88	ML-22C	Ol-5	94.966	39.9234	0.0758	13.9209	0.3216	0.2049	46.058	0.2487	100.753		0.991709	0.00148868	0.289187	0.00642565	0.00431107	1.70557	0.00661897	3.00531	85.5026		0.25	25.15	0.61	5.92	10.56	0.25	2.26		25-03-2013	30	15
3291.88	ML-22C	Ol-5	99.966	40.1066	0.0373	14.1714	0.3076	0.2035	45.8565	0.2431	100.926		0.995235	0.000731803	0.294089	0.0061396	0.00427721	1.69637	0.00646328	3.0033	85.225		0.25	51.67	0.61	6.03	10.59	0.25	2.3		25-03-2013	30	15
3291.88	ML-22C	Ol-5	104.966	39.8216	0.0591	14.0912	0.3156	0.2209	45.9068	0.2463	100.662		0.991149	0.00116301	0.293309	0.00631831	0.00465695	1.70336	0.00656814	3.00652	85.3101		0.26	33.49	0.61	5.94	10.18	0.25	2.29		25-03-2013	30	15
3291.88	ML-22C	Ol-5	109.966	40.0964	0.0627	14.2616	0.3093	0.1716	45.655	0.2488	100.805		0.996247	0.0012317	0.296337	0.00618138	0.00361131	1.69106	0.00662323	3.00129	85.0892		0.25	31.57	0.61	6.13	12.24	0.25	2.26		25-03-2013	30	15
3291.88	ML-22C	Ol-5	114.966	40.0048	0.0498	14.3017	0.3191	0.208	45.6651	0.2478	100.796		0.994759	0.000979063	0.297406	0.00638229	0.00438082	1.69277	0.00660184	3.00328	85.0563		0.25	39.67	0.6	5.91	10.63	0.25	2.26		25-03-2013	30	15
3291.88	ML-22C	Ol-5	119.966	39.9336	0.0529	14.3518	0.3319	0.1963	45.7255	0.2499	100.842		0.992991	0.00104001	0.298449	0.00663832	0.00413441	1.69502	0.00665781	3.00493	85.0286		0.25	37.18	0.6	5.67	11.25	0.25	2.27		25-03-2013	30	15
3291.88	ML-22C	Ol-5	124.966	39.5265	0.0689	14.5122	0.2984	0.2027	43.3179	0.2566	98.1831		1.00951	0.00139129	0.309965	0.00613008	0.00438494	1.6493	0.00702163	2.9877	84.1795		0.26	26.83	0.6	6.23	10.91	0.26	2.21		25-03-2013	30	15
3291.88	ML-22C	Ol-5	129.966	40.0353	0.0512	14.4921	0.2816	0.1746	45.4132	0.2514	100.699		0.996798	0.00100788	0.301753	0.00563949	0.00368208	1.6856	0.00670636	3.00119	84.8163		0.25	37.35	0.6	6.57	12.45	0.25	2.24		25-03-2013	30	15
3291.88	ML-22C	Ol-5	134.966	39.9844	0.0754	14.422	0.3077	0.2244	45.6248	0.2464	100.885		0.993859	0.00148177	0.299788	0.00615184	0.00472436	1.69061	0.00656194	3.00318	84.9383		0.25	25.88	0.6	6.09	10.08	0.25	2.29		25-03-2013	30	15
3291.88	ML-22C	Ol-5	139.966	39.7809	0.0466	14.5022	0.3099	0.1968	45.6852	0.2435	100.765		0.990912	0.000917744	0.302099	0.00620906	0.00415213	1.69646	0.00649856	3.00725	84.8842		0.26	40.24	0.6	6.1	11.02	0.25	2.31		25-03-2013	30	15
3291.88	ML-22C	Ol-7	0	39.1601	0.0566	18.1603	0.1957	0.2273	42.1392	0.2878	100.227		0.996951	0.00113926	0.386641	0.00400742	0.00490134	1.59928	0.00785015	3.00077	80.5309		0.26	34.23	0.53	8.98	10.03	0.26	2.03		25-03-2013	30	15
3291.88	ML-22C	Ol-7	4.00031	39.5672	0.0779	15.2739	0.2671	0.2254	44.3152	0.2468	99.9734		0.996491	0.00155114	0.321694	0.00541073	0.00480815	1.66379	0.00665949	3.00041	83.7977		0.26	24.74	0.58	6.84	9.67	0.25	2.29		25-03-2013	30	15
3291.88	ML-22C	Ol-7	8.00031	40.0048	0.0387	13.4799	0.3099	0.2191	46.0177	0.2431	100.313		0.995942	0.000761743	0.28065	0.00620565	0.00462009	1.70787	0.00648432	3.00253	85.8865		0.25	47.88	0.62	6.08	9.8	0.25	2.3		25-03-2013	30	15
3291.88	ML-22C	Ol-7	12.0003	39.9641	0.0901	12.9487	0.3446	0.1676	46.2796	0.2474	100.042		0.995079	0.00177373	0.269631	0.00690156	0.00353466	1.71785	0.00660002	3.00137	86.4335		0.25	21.93	0.63	5.45	12.92	0.24	2.23		25-03-2013	30	15
3291.88	ML-22C	Ol-7	16.0003	40.1574	0.0753	12.9888	0.3043	0.1958	46.3602	0.2402	100.322		0.996859	0.00147788	0.269645	0.00607594	0.00411686	1.71562	0.00638849	3.00019	86.4177		0.25	26.01	0.63	6.12	10.8	0.24	2.31		25-03-2013	30	15
3291.88	ML-22C	Ol-7	20.0003	40.2287	0.0922	12.9587	0.3238	0.1833	46.2494	0.2323	100.268		0.998697	0.00180969	0.26904	0.00646574	0.0038543	1.71164	0.00617881	2.99768	86.4168		0.25	21.29	0.63	5.8	11.64	0.24	2.4		25-03-2013	30	15
3291.88	ML-22C	Ol-7	24.0003	39.9437	0.0591	13.0289	0.3132	0.1648	46.2191	0.2401	99.969		0.995643	0.00116471	0.271593	0.00627944	0.00347935	1.71746	0.00641217	3.00203	86.3456		0.25	33.12	0.63	5.98	13.08	0.24	2.31		25-03-2013	30	15
3291.88	ML-22C	Ol-7	28.0003	40.3203	0.0391	13.0189	0.3036	0.1934	46.2695	0.2408	100.386		1.00011	0.000766788	0.270055	0.00605716	0.00406318	1.71091	0.00639937	2.99836	86.3675		0.25	47.84	0.63	6.13	11.04	0.24	2.31		25-03-2013	30	15
3291.88	ML-22C	Ol-7	32.0003	40.1574	0.0644	12.9988	0.2989	0.217	46.4307	0.2296	100.397		0.996303	0.00126324	0.269703	0.00596479	0.00456006	1.71727	0.00610316	3.00117	86.4265		0.25	30.16	0.63	6.25	10.19	0.24	2.41		25-03-2013	30	15
3291.88	ML-22C	Ol-7	36.0003	40.0353	0.0701	12.9988	0.3022	0.19	46.3803	0.2364	100.213		0.995241	0.00137778	0.270237	0.00604259	0.00400059	1.71881	0.00629637	3.002	86.4137		0.25	28.44	0.63	6.21	11.51	0.24	2.34		25-03-2013	30	15
3291.88	ML-22C	Ol-7	40.0003	40.2389	0.0833	12.9988	0.3244	0.1784	46.4206	0.2343	100.479		0.997176	0.0016321	0.269393	0.00646623	0.00374461	1.71493	0.00622094	2.99956	86.4239		0.25	23.88	0.63	5.76	11.71	0.24	2.36		25-03-2013	30	15
3291.88	ML-22C	Ol-7	44.0003	40.4119	0.0601	12.8485	0.2991	0.1907	46.4609	0.2348	100.506		1.00013	0.00117597	0.265922	0.00595396	0.00399744	1.71412	0.00622589	2.99752	86.5699		0.25	34.15	0.64	6.3	11.16	0.24	2.35		25-03-2013	30	15
3291.88	ML-22C	Ol-7	48.0003	40.3712	0.074	12.9788	0.306	0.1795	46.5113	0.2402	100.661		0.998269	0.00144672	0.26839	0.00608614	0.00375947	1.71452	0.00636366	2.99884	86.4649		0.25	27.58	0.63	6.12	11.65	0.24	2.31		25-03-2013	30	15
3291.88	ML-22C	Ol-7	52.0003	40.2083	0.0838	12.9988	0.32	0.1923	47.0452	0.2301	101.079		0.991047	0.00163304	0.26794	0.00634413	0.00401461	1.72863	0.00607649	3.00569	86.58		0.25	24.09	0.63	5.84	11.38	0.24	2.38		25-03-2013	30	15
3291.88	ML-22C	Ol-7	56.0003	40.2999	0.0726	12.9287	0.3019	0.1726	46.5415	0.2269	100.544		0.997531	0.0014208	0.267628	0.00601076	0.00361867	1.7174	0.00601748	2.99963	86.5177		0.25	26.63	0.63	6.25	12.4	0.24	2.43		25-03-2013	30	15
3291.88	ML-22C	Ol-7	60.0003	40.4017	0.059	13.0289	0.3099	0.1829	46.3501	0.2231	100.556		1.00017	0.00115479	0.269735	0.00617077	0.00383507	1.71054	0.0059174	2.99752	86.3789		0.25	32.91	0.63	6.01	11.82	0.24	2.46		25-03-2013	30	15
3291.88	ML-22C	Ol-7	64.0003	40.2389	0.0592	13.0289	0.309	0.1847	46.5818	0.2292	100.632		0.995968	0.0011585	0.269689	0.0061518	0.00387215	1.7188	0.00607816	3.00171	86.4375		0.25	32.77	0.63	6.05	11.89	0.24	2.41		25-03-2013	30	15
3291.88	ML-22C	Ol-7	68.0003	40.188	0.0889	12.9888	0.3084	0.1921	46.34	0.2369	100.343		0.997246	0.00174415	0.269545	0.00615552	0.00403756	1.71424	0.00629838	2.99927	86.4126		0.25	22.5	0.63	6.03	11.45	0.24	2.33		25-03-2013	30	15
3291.88	ML-22C	Ol-7	72.0003	40.1676	0.0999	12.9988	0.3324	0.1706	46.4911	0.2227	100.483		0.995476	0.00195747	0.269411	0.00662612	0.00358112	1.71764	0.00591334	3.00061	86.4417		0.25	19.4	0.63	5.64	12.61	0.24	2.45		25-03-2013	30	15
3291.88	ML-22C	Ol-8	0	39.2008	0.0521	18.2705	0.1939	0.1908	42.109	0.2717	100.289		0.997554	0.00104822	0.388819	0.00396883	0.00411249	1.59744	0.00740778	3.00035	80.4245		0.26	36.91	0.53	9.05	11.46	0.26	2.13		25-03-2013	30	15
3291.88	ML-22C	Ol-8	4.00929	39.9234	0.0437	14.2316	0.3053	0.1703	45.4132	0.2472	100.335		0.996794	0.000862651	0.297157	0.00613125	0.00360146	1.69032	0.00661278	3.00148	85.0485		0.25	45.38	0.6	6.05	12.29	0.25	2.29		25-03-2013	30	15
3291.88	ML-22C	Ol-8	8.00929	39.9743	0.0776	13.3997	0.3295	0.1581	46.874	0.2507	101.064		0.987725	0.00151598	0.27689	0.0065487	0.00330882	1.72662	0.00663694	3.00924	86.1797		0.25	23.96	0.62	5.7	13.53	0.24	2.23		25-03-2013	30	15
3291.88	ML-22C	Ol-8	12.0093	40.188	0.0613	13.2093	0.2716	0.1872	46.3501	0.2475	100.515		0.996557	0.00120183	0.273931	0.00541726	0.00393185	1.71343	0.00657565	3.00104	86.2163		0.25	31.32	0.63	6.89	11.09	0.24	2.28		25-03-2013	30	15
3291.88	ML-22C	Ol-8	16.0093	40.0557	0.0751	13.2093	0.3311	0.1896	46.2191	0.2411	100.321		0.995647	0.0014759	0.274585	0.00661979	0.00399177	1.71266	0.0064209	3.0014	86.1826		0.25	26.88	0.63	5.65	10.96	0.24	2.3		25-03-2013	30	15
3291.88	ML-22C	Ol-8	20.0093	40.1778	0.0724	13.1492	0.3243	0.1649	46.2494	0.2429	100.381		0.997392	0.001421	0.272982	0.00647546	0.00346726	1.71157	0.00646048	2.99977	86.2446		0.25	27.48	0.63	5.78	13.03	0.24	2.29		25-03-2013	30	15
3291.88	ML-22C	Ol-8	24.0093	40.1269	0.0656	13.2193	0.3342	0.1786	46.4609	0.2358	100.621		0.994474	0.0012854	0.273982	0.00666205	0.00374908	1.71654	0.00626122	3.00296	86.2357		0.25	29.02	0.63	5.58	11.93	0.24	2.35		25-03-2013	30	15
3291.88	ML-22C	Ol-8	28.0093	40.3203	0.0668	13.2594	0.3396	0.2025	46.3098	0.2305	100.729		0.997926	0.00130715	0.274445	0.00676062	0.00424508	1.70866	0.00611228	2.99946	86.1609		0.25	29.02	0.63	5.54	10.56	0.24	2.4		25-03-2013	30	15
3291.88	ML-22C	Ol-8	32.0093	40.2897	0.0429	13.2393	0.3092	0.1718	46.2191	0.2322	100.504		0.999138	0.000841131	0.27457	0.00616758	0.00360861	1.70868	0.00616952	2.99918	86.1556		0.25	46.31	0.63	5.99	12.19	0.24	2.38		25-03-2013	30	15
3291.88	ML-22C	Ol-8	36.0093	40.1981	0.0839	13.1892	0.3313	0.1703	46.4206	0.2359	100.629		0.995676	0.00164304	0.273204	0.00660051	0.00357283	1.71408	0.00626033	3.00104	86.2524		0.25	23.14	0.63	5.61	12.54	0.24	2.35		25-03-2013	30	15
3291.88	ML-22C	Ol-8	40.0093	40.0557	0.0364	13.2393	0.3062	0.1826	46.4106	0.2338	100.465		0.994504	0.000714528	0.274894	0.00611493	0.00383998	1.71778	0.00621934	3.00407	86.2048		0.25	52.63	0.63	6.1	11.55	0.24	2.36		25-03-2013	30	15
3291.88	ML-22C	Ol-8	44.0093	40.2287	0.0542	13.1391	0.3163	0.1794	46.4508	0.2364	100.605		0.996494	0.00106148	0.272183	0.00630205	0.00376398	1.7153	0.00627399	3.00138	86.3052		0.25	35.19	0.63	5.98	11.87	0.24	2.34		25-03-2013	30	15
3291.88	ML-22C	Ol-8	48.0093	40.3304	0.0629	13.2293	0.3284	0.212	46.4408	0.2291	100.833		0.997075	0.00122948	0.27352	0.00653043	0.00443932	1.7116	0.00606845	3.00047	86.2215		0.25	32.25	0.63	5.66	10.38	0.24	2.4		25-03-2013	30	15
3291.88	ML-22C	Ol-8	52.0093	40.188	0.0758	13.2895	0.3313	0.1793	46.1788	0.2294	100.472		0.997372	0.00148732	0.275819	0.00661343	0.00376901	1.70849	0.00609975	2.99965	86.1		0.25	25.58	0.63	5.67	11.8	0.24	2.41		25-03-2013	30	15
3291.88	ML-22C	Ol-8	56.0093	40.0353	0.0557	13.1993	0.3262	0.1882	46.2897	0.2278	100.322		0.995199	0.0010947	0.274393	0.0065222	0.00396252	1.71537	0.00606705	3.00261	86.2098		0.25	34.2	0.63	5.77	11.49	0.24	2.42		25-03-2013	30	15
3291.88	ML-22C	Ol-8	60.0093	39.842	0.068	13.3095	0.3066	0.1477	46.2494	0.2309	100.154		0.992688	0.00133954	0.277326	0.00614452	0.00311701	1.71785	0.00616387	3.00463	86.1002		0.25	27.69	0.63	6.07	14.22	0.24	2.4		25-03-2013	30	15
3291.88	ML-22C	Ol-8	64.0093	40.1981	0.1066	13.2694	0.3119	0.1775	46.2796	0.2292	100.572		0.99633	0.00208896	0.275046	0.00621808	0.00372633	1.71	0.00608652	2.99949	86.1441		0.25	18.77	0.63	6.03	11.74	0.24	2.41		25-03-2013	30	15
3291.88	ML-22C	Ol-8	68.0093	40.015	0.0566	13.2995	0.3089	0.1751	46.4206	0.2296	100.505		0.993351	0.00111089	0.276103	0.00616796	0.00368173	1.71791	0.00610674	3.00443	86.1534		0.25	34.42	0.62	6.08	12.23	0.24	2.39		25-03-2013	30	15
3291.88	ML-22C	Ol-8	72.0093	40.2897	0.0546	13.3195	0.316	0.206	46.33	0.2403	100.756		0.997264	0.00106852	0.275715	0.00629139	0.00431886	1.70957	0.00637276	3.0006	86.112		0.25	35.08	0.62	5.93	10.52	0.24	2.31		25-03-2013	30	15
3291.88	ML-22C	Ol-8	76.0093	40.1066	0.0674	13.2995	0.334	0.1825	46.6322	0.2381	100.86		0.992178	0.00131829	0.275147	0.00664606	0.00382404	1.71976	0.0063109	3.00519	86.2075		0.25	30.39	0.63	5.65	11.22	0.24	2.34		25-03-2013	30	15
3291.88	ML-22C	Ol-8	80.0093	40.2796	0.0601	13.2995	0.3235	0.1858	46.2393	0.2267	100.614		0.998154	0.00117751	0.275616	0.00644809	0.00389982	1.70818	0.00601897	2.99949	86.1066		0.25	33.29	0.63	5.75	11.32	0.24	2.44		25-03-2013	30	15
3291.88	ML-22C	Ol-8	84.0093	40.188	0.046	13.3095	0.3181	0.1792	46.3501	0.2335	100.624		0.996167	0.000901507	0.275901	0.00634225	0.00376235	1.71275	0.00620127	3.00203	86.1262		0.25	41.02	0.62	5.98	11.44	0.24	2.37		25-03-2013	30	15
3291.88	ML-22C	Ol-8	88.0093	40.2694	0.0714	13.1792	0.3221	0.2093	46.2393	0.2274	100.518		0.998364	0.00139955	0.27325	0.00642315	0.0043951	1.70897	0.00604035	2.99884	86.2149		0.25	27.92	0.63	5.76	10.17	0.24	2.43		25-03-2013	30	15
3291.88	ML-22C	Ol-9	0	39.7097	0.0512	15.805	0.2438	0.1927	44.1137	0.2676	100.384		0.997934	0.0010173	0.332168	0.00492814	0.00410179	1.65268	0.00720526	3.00003	83.2648		0.25	37	0.57	7.33	11.13	0.25	2.13		25-03-2013	30	15
3291.88	ML-22C	Ol-9	3.99716	39.7097	0.0706	14.1113	0.2849	0.2218	45.2017	0.2645	99.8644		0.996021	0.00140008	0.296002	0.00574789	0.00471215	1.69019	0.00710813	3.00118	85.097		0.25	27.43	0.6	6.43	9.82	0.25	2.15		25-03-2013	30	15
3291.88	ML-22C	Ol-9	7.99716	39.6384	0.0666	13.991	0.274	0.2131	45.3326	0.2553	99.7711		0.994753	0.00132144	0.293633	0.00553087	0.00452969	1.69597	0.00686448	3.0026	85.2417		0.25	29.25	0.61	6.64	10.31	0.25	2.2		25-03-2013	30	15
3291.88	ML-22C	Ol-9	11.9972	39.4247	0.0611	13.961	0.2861	0.209	45.0606	0.2503	99.2528		0.994821	0.00121897	0.29461	0.00580682	0.00446692	1.69505	0.00676698	3.00274	85.1929		0.25	32.17	0.61	6.38	10.39	0.25	2.25		25-03-2013	30	15
3291.88	ML-22C	Ol-9	15.9972	39.4654	0.113	13.7805	0.2884	0.1774	45.0405	0.243	99.1083		0.995906	0.00225453	0.29082	0.00585384	0.00379176	1.69439	0.00657	2.99959	85.3507		0.25	16.61	0.61	6.31	12.3	0.25	2.29		25-03-2013	30	15
3291.88	ML-22C	Ol-9	19.9972	39.4044	0.0656	13.8507	0.3058	0.1858	45.1009	0.2472	99.1604		0.994743	0.00130932	0.292411	0.00620937	0.00397281	1.69731	0.00668609	3.00264	85.3039		0.25	30.54	0.61	5.98	11.66	0.25	2.25		25-03-2013	30	15
3291.88	ML-22C	Ol-9	23.9972	39.5163	0.0662	13.9309	0.2998	0.2055	45.4032	0.2388	99.6607		0.992895	0.00131511	0.292726	0.00605902	0.00437345	1.70068	0.00642864	3.00447	85.3152		0.25	30.43	0.61	6.19	10.31	0.25	2.32		25-03-2013	30	15
3291.88	ML-22C	Ol-9	27.9972	39.9132	0.0907	13.9509	0.3094	0.1869	45.2923	0.2389	99.9824		0.998505	0.00179398	0.291872	0.00622584	0.00396031	1.68915	0.00640336	2.99791	85.2665		0.25	22.1	0.61	6.06	11.68	0.25	2.3		25-03-2013	30	15
3291.88	ML-22C	Ol-9	31.9972	39.8114	0.0677	13.8708	0.2933	0.1863	45.4938	0.2415	99.9648		0.99618	0.00133935	0.290259	0.00590318	0.00394847	1.69704	0.00647448	3.00114	85.3942		0.25	29.73	0.61	6.31	11.48	0.25	2.3		25-03-2013	30	15
3291.88	ML-22C	Ol-9	35.9972	39.7606	0.0912	13.8507	0.2952	0.2012	45.6147	0.2348	100.048		0.994133	0.00180286	0.289615	0.0059368	0.00426095	1.70022	0.00628996	3.00226	85.4453		0.25	21.64	0.61	6.3	10.89	0.25	2.37		25-03-2013	30	15
3291.88	ML-22C	Ol-9	39.9972	39.8013	0.1159	13.9409	0.3158	0.1692	45.7557	0.2398	100.339		0.992542	0.00228513	0.290736	0.00633444	0.00357387	1.70101	0.00640706	3.00289	85.4029		0.25	17.37	0.61	5.92	12.84	0.25	2.31		25-03-2013	30	15
3291.88	ML-22C	Ol-9	43.9972	39.6079	0.0484	13.961	0.3246	0.206	45.7154	0.2355	100.099		0.991159	0.000957596	0.292168	0.00653362	0.00436631	1.70543	0.00631408	3.00693	85.374		0.25	41.03	0.61	5.74	10.56	0.25	2.34		25-03-2013	30	15
3291.88	ML-22C	Ol-9	47.9972	39.9743	0.0709	13.8507	0.2988	0.202	45.4737	0.2357	100.106		0.998394	0.00140005	0.289301	0.00600269	0.00427325	1.69313	0.00630723	2.99881	85.4068		0.25	27.72	0.61	6.18	10.7	0.25	2.34		25-03-2013	30	15
3291.88	ML-22C	Ol-9	51.9972	39.903	0.0724	13.9008	0.3122	0.179	45.5039	0.2407	100.112		0.996959	0.00143016	0.290448	0.00627405	0.003788	1.69484	0.00644325	3.00018	85.37		0.25	26.93	0.61	5.89	12.15	0.25	2.31		25-03-2013	30	15
3291.88	ML-22C	Ol-9	55.9972	39.6893	0.0695	13.8607	0.2889	0.2392	45.7255	0.2398	100.113		0.992277	0.00137379	0.289802	0.00580966	0.00506531	1.70422	0.00642342	3.00498	85.4665		0.25	27.67	0.61	6.39	9.12	0.25	2.31		25-03-2013	30	15
3291.88	ML-22C	Ol-9	59.9972	39.7911	0.0558	13.8908	0.3089	0.1858	45.6349	0.2344	100.102		0.994659	0.0011028	0.290383	0.00621084	0.00393387	1.70057	0.00627775	3.00314	85.4148		0.25	34.2	0.61	6.08	11.57	0.25	2.37		25-03-2013	30	15
3291.88	ML-22C	Ol-9	63.9972	39.9743	0.0256	14.0512	0.3102	0.1661	45.6953	0.2365	100.459		0.996091	0.000504352	0.292811	0.00621734	0.00350569	1.69746	0.00631404	3.0029	85.2879		0.25	77.22	0.61	6.01	13.39	0.25	2.34		25-03-2013	30	15
3291.88	ML-22C	Ol-9	67.9972	39.7198	0.0751	13.981	0.2949	0.1734	45.6953	0.2328	100.172		0.992597	0.00148382	0.292186	0.00592767	0.00367029	1.70234	0.00623313	3.00444	85.3506		0.25	25.41	0.61	6.27	12.07	0.25	2.4		25-03-2013	30	15
3291.88	ML-22C	Ol-9	71.9972	39.8114	0.0625	14.1213	0.3262	0.1964	45.786	0.2333	100.537		0.992091	0.0012314	0.294289	0.0065384	0.00414544	1.70092	0.00622897	3.00545	85.2502		0.25	30.86	0.61	5.66	10.95	0.25	2.37		25-03-2013	30	15
3291.88	ML-22C	Ol-9	75.9972	39.7402	0.0562	14.0712	0.322	0.1922	45.6349	0.2339	100.251		0.992981	0.00111025	0.294034	0.00647159	0.00406771	1.69987	0.00626179	3.0048	85.2534		0.25	33.94	0.61	5.82	11.27	0.25	2.36		25-03-2013	30	15
3291.88	ML-22C	Ol-9	79.9972	39.8929	0.0688	14.1213	0.3202	0.2017	45.6953	0.2268	100.527		0.993901	0.00135523	0.294225	0.00641672	0.00425637	1.69718	0.00605409	3.00339	85.2253		0.25	27.74	0.61	5.88	10.66	0.25	2.45		25-03-2013	30	15
3291.88	ML-22C	Ol-9	83.9972	39.8929	0.0524	14.1614	0.3271	0.2139	45.6852	0.2347	100.568		0.993876	0.00103215	0.295053	0.00655483	0.00451371	1.69676	0.00626481	3.00406	85.1868		0.25	37.35	0.61	5.76	10.19	0.25	2.35		25-03-2013	30	15
3291.88	ML-22C	Ol-9	87.9972	39.8216	0.0435	13.961	0.2835	0.1693	45.6752	0.2343	100.188		0.994701	0.000859089	0.291638	0.00569601	0.00358192	1.70083	0.00627052	3.00358	85.363		0.25	44.67	0.61	6.53	12.59	0.25	2.36		25-03-2013	30	15
3291.88	ML-22C	Ol-9	91.9972	39.9234	0.0822	13.971	0.2836	0.1934	45.5946	0.2301	100.278		0.996001	0.00162136	0.291485	0.00569092	0.00408672	1.69572	0.00615045	3.00076	85.3319		0.25	24.58	0.61	6.61	11	0.25	2.41		25-03-2013	30	15
2996.22	ML-05	Ol-2 C	0	37.8165	0.0737	19.1803	0.2336	0.2184	40.9844	0.2636	98.7705		0.984796	0.00151743	0.417711	0.00489307	0.00481729	1.59108	0.00735475	3.01217	79.2058		n.a.	n.a.	n.a.	n.a.	n.a.	n.a.	n.a.		26-02-2016	40	15
2996.22	ML-05	Ol-2 C	4	38.625	0.0324	17.3684	0.2269	0.214	43.0911	0.2357	99.7935		0.985918	0.000653872	0.370756	0.00465855	0.00462671	1.63972	0.00644599	3.01277	81.5588		n.a.	n.a.	n.a.	n.a.	n.a.	n.a.	n.a.		26-02-2016	40	15
2996.22	ML-05	Ol-2 C	8	38.8945	0.0115	15.9229	0.2745	0.1953	44.2261	0.2736	99.7984		0.986279	0.00023056	0.337668	0.00559884	0.00419469	1.67186	0.00743336	3.01326	83.1966		n.a.	n.a.	n.a.	n.a.	n.a.	n.a.	n.a.		26-02-2016	40	15
2996.22	ML-05	Ol-2 C	12	38.8634	0.0572	14.9412	0.3312	0.2009	44.9677	0.2544	99.616		0.983243	0.00114417	0.316127	0.00673991	0.00430512	1.69601	0.00689596	3.01447	84.289		n.a.	n.a.	n.a.	n.a.	n.a.	n.a.	n.a.		26-02-2016	40	15
2996.22	ML-05	Ol-2 C	16	39.0978	0.028	14.7226	0.2998	0.2345	45.5422	0.2592	100.184		0.982453	0.000556279	0.309385	0.00605947	0.004991	1.70601	0.00697834	3.01643	84.6489		n.a.	n.a.	n.a.	n.a.	n.a.	n.a.	n.a.		26-02-2016	40	15
2996.22	ML-05	Ol-2 C	20	39.113	0.0455	14.2863	0.2742	0.1659	45.2136	0.2903	99.3888		0.987975	0.000908681	0.301787	0.00557104	0.00354942	1.70256	0.00785651	3.01021	84.9434		n.a.	n.a.	n.a.	n.a.	n.a.	n.a.	n.a.		26-02-2016	40	15
2996.22	ML-05	Ol-2 C	24	39.1732	0.0691	14.6053	0.3292	0.2028	45.5981	0.2602	100.238		0.982919	0.00137082	0.306475	0.00664404	0.00431005	1.70563	0.00699509	3.01434	84.7684		n.a.	n.a.	n.a.	n.a.	n.a.	n.a.	n.a.		26-02-2016	40	15
2996.22	ML-05	Ol-2 C	28	39.0655	0.0574	14.6023	0.3156	0.2116	45.4619	0.2293	99.9436		0.983209	0.00114219	0.307348	0.00638901	0.0045108	1.70572	0.00618321	3.01451	84.7324		n.a.	n.a.	n.a.	n.a.	n.a.	n.a.	n.a.		26-02-2016	40	15
2996.22	ML-05	Ol-2 C	32	39.084	0.049	14.4929	0.3327	0.2328	45.39	0.2966	99.878		0.984157	0.000975521	0.305194	0.00673848	0.00496517	1.70386	0.00800192	3.01389	84.8091		n.a.	n.a.	n.a.	n.a.	n.a.	n.a.	n.a.		26-02-2016	40	15
2996.22	ML-05	Ol-2 C	36	39.3406	0.0561	14.3429	0.2885	0.2082	45.1691	0.2388	99.6442		0.990886	0.00111717	0.302117	0.00584484	0.0044417	1.69603	0.00644429	3.00688	84.8801		n.a.	n.a.	n.a.	n.a.	n.a.	n.a.	n.a.		26-02-2016	40	15
2996.22	ML-05	Ol-2 C	40	39.0507	0.0468	14.5309	0.3335	0.1957	45.2047	0.2555	99.6178		0.985745	0.000934022	0.30675	0.00677135	0.0041842	1.70109	0.0069101	3.01239	84.7224		n.a.	n.a.	n.a.	n.a.	n.a.	n.a.	n.a.		26-02-2016	40	15
2996.22	ML-05	Ol-2 C	44	38.9665	0.0656	14.2771	0.3758	0.2187	45.2683	0.2284	99.4004		0.984967	0.00131102	0.301805	0.00764066	0.00468236	1.70582	0.00618563	3.01241	84.9671		n.a.	n.a.	n.a.	n.a.	n.a.	n.a.	n.a.		26-02-2016	40	15
2996.22	ML-05	Ol-2 C	48	39.0717	0.0616	14.6092	0.3292	0.1675	45.3853	0.2442	99.8687		0.983963	0.00122651	0.30768	0.00666838	0.00357287	1.70388	0.006589	3.01358	84.7045		n.a.	n.a.	n.a.	n.a.	n.a.	n.a.	n.a.		26-02-2016	40	15
2996.22	ML-05	Ol-2 C	52	39.046	0.0373	14.5412	0.3034	0.2292	45.2393	0.2948	99.6912		0.985163	0.000744073	0.306823	0.00615731	0.00489815	1.70159	0.00796924	3.01335	84.7231		n.a.	n.a.	n.a.	n.a.	n.a.	n.a.	n.a.		26-02-2016	40	15
2996.22	ML-05	Ol-2 C	56	39.046	0.0527	14.3401	0.3586	0.1905	45.316	0.2509	99.5548		0.985491	0.00105163	0.30268	0.00727998	0.00407246	1.70505	0.00678476	3.01241	84.9242		n.a.	n.a.	n.a.	n.a.	n.a.	n.a.	n.a.		26-02-2016	40	15
2996.22	ML-05	Ol-2 C	60	38.9444	0.028	14.3204	0.272	0.2276	45.3131	0.2219	99.3274		0.985114	0.000559983	0.302937	0.00553419	0.0048764	1.70873	0.0060139	3.01377	84.941		n.a.	n.a.	n.a.	n.a.	n.a.	n.a.	n.a.		26-02-2016	40	15
2996.22	ML-05	Ol-2 C	64	38.8851	0.0533	14.3047	0.3084	0.2169	45.254	0.2592	99.2816		0.984234	0.00106664	0.302796	0.00627875	0.00465008	1.70758	0.00702923	3.01363	84.9383		n.a.	n.a.	n.a.	n.a.	n.a.	n.a.	n.a.		26-02-2016	40	15
2996.22	ML-05	Ol-2 C	68	39.1116	0.0039	14.4041	0.3013	0.1764	45.2703	0.2518	99.5194		0.987497	7.78521e-05	0.304139	0.0061189	0.00377237	1.70393	0.00681151	3.01235	84.8542		n.a.	n.a.	n.a.	n.a.	n.a.	n.a.	n.a.		26-02-2016	40	15
2996.22	ML-05	Ol-2 C	72	38.7716	0.0368	14.6661	0.3091	0.1974	45.1452	0.2704	99.3966		0.982169	0.000737048	0.310701	0.00629819	0.00423551	1.70488	0.007339	3.01636	84.585		n.a.	n.a.	n.a.	n.a.	n.a.	n.a.	n.a.		26-02-2016	40	15
2996.22	ML-05	Ol-2 C	76	39.0083	0.0569	14.6053	0.3177	0.1851	45.1864	0.2564	99.6161		0.984965	0.00113593	0.308411	0.00645245	0.00395873	1.7009	0.00693648	3.01276	84.6509		n.a.	n.a.	n.a.	n.a.	n.a.	n.a.	n.a.		26-02-2016	40	15
2996.22	ML-05	Ol-2 C	80	39.161	0.0668	14.4701	0.3049	0.2063	45.2398	0.2564	99.7053		0.986932	0.00133102	0.304973	0.00618066	0.00440371	1.69966	0.00692324	3.01041	84.7866		n.a.	n.a.	n.a.	n.a.	n.a.	n.a.	n.a.		26-02-2016	40	15
2996.22	ML-05	Ol-2 C	84	38.9838	0.042	14.5478	0.3091	0.2204	45.0214	0.2377	99.3622		0.986684	0.000840463	0.307927	0.0062927	0.00472489	1.69872	0.00644586	3.01163	84.6547		n.a.	n.a.	n.a.	n.a.	n.a.	n.a.	n.a.		26-02-2016	40	15
2996.22	ML-05	Ol-2 C	88	39.0776	0.0337	14.6159	0.3492	0.2063	45.3759	0.2377	99.8963		0.98424	0.000671087	0.307861	0.00707443	0.00440107	1.70375	0.00641446	3.01442	84.6958		n.a.	n.a.	n.a.	n.a.	n.a.	n.a.	n.a.		26-02-2016	40	15
2996.22	ML-05	Ol-2 C	92	38.9217	0.0504	14.5037	0.3227	0.2345	45.0505	0.2498	99.3333		0.985499	0.00100895	0.307114	0.00657215	0.00502913	1.70048	0.00677664	3.01248	84.7024		n.a.	n.a.	n.a.	n.a.	n.a.	n.a.	n.a.		26-02-2016	40	15
2996.22	ML-05	Ol-2 C	96	38.9667	0.0303	14.783	0.3083	0.1727	44.9133	0.2366	99.4109		0.98668	0.000606598	0.313041	0.00627914	0.00370391	1.69538	0.00641882	3.01211	84.4135		n.a.	n.a.	n.a.	n.a.	n.a.	n.a.	n.a.		26-02-2016	40	15
2996.22	ML-05	Ol-2 C	100	39.2313	0.0586	14.7529	0.3463	0.171	45.1667	0.2685	99.9953		0.987055	0.00116569	0.310415	0.00700818	0.0036441	1.69409	0.00723787	3.01061	84.5141		n.a.	n.a.	n.a.	n.a.	n.a.	n.a.	n.a.		26-02-2016	40	15
2996.22	ML-05	Ol-2 C	104	39.1977	0.0418	14.7482	0.2862	0.2098	45.1527	0.233	99.8694		0.987361	0.000832467	0.310678	0.00579868	0.00447617	1.69554	0.00628824	3.01097	84.5142		n.a.	n.a.	n.a.	n.a.	n.a.	n.a.	n.a.		26-02-2016	40	15
2996.22	ML-05	Ol-2 C	108	39.0865	0.0474	14.6907	0.3098	0.2256	45.0864	0.2301	99.6765		0.98659	0.000945941	0.310105	0.00628978	0.0048232	1.69654	0.00622278	3.01152	84.5461		n.a.	n.a.	n.a.	n.a.	n.a.	n.a.	n.a.		26-02-2016	40	15
2996.22	ML-05	Ol-2 C	112	39.0622	0.0407	14.4294	0.3042	0.0758	45.1586	0.2303	99.3012		0.987888	0.000813806	0.305179	0.00618806	0.0016237	1.70255	0.00624026	3.01048	84.7998		n.a.	n.a.	n.a.	n.a.	n.a.	n.a.	n.a.		26-02-2016	40	15
2996.22	ML-05	Ol-2 C	116	39.1511	0.0359	14.8718	0.3633	0.222	45.1785	0.2525	100.075		0.985394	0.000714391	0.31303	0.00735487	0.00473265	1.69514	0.00680903	3.01318	84.4122		n.a.	n.a.	n.a.	n.a.	n.a.	n.a.	n.a.		26-02-2016	40	15
2996.22	ML-05	Ol-2 C	120	39.0815	0.0172	14.5513	0.3155	0.2327	45.0499	0.2545	99.5026		0.98781	0.000343721	0.307581	0.00641424	0.00498178	1.69748	0.00689204	3.0115	84.6598		n.a.	n.a.	n.a.	n.a.	n.a.	n.a.	n.a.		26-02-2016	40	15
2996.22	ML-05	Ol-2 C	124	39.4344	0.0556	14.8082	0.3069	0.1956	45.2438	0.2245	100.269		0.989041	0.00110253	0.310597	0.00619127	0.00415522	1.69163	0.00603272	3.00875	84.4875		n.a.	n.a.	n.a.	n.a.	n.a.	n.a.	n.a.		26-02-2016	40	15
2996.22	ML-05	Ol-2 C	128	38.9838	0.0257	14.7987	0.3068	0.1832	44.9237	0.2263	99.4482		0.98681	0.000514349	0.313277	0.00624667	0.0039279	1.69525	0.0061375	3.01216	84.4026		n.a.	n.a.	n.a.	n.a.	n.a.	n.a.	n.a.		26-02-2016	40	15
2996.22	ML-05	Ol-2 C	132	39.0378	0.0741	15.2478	0.331	0.1866	45.0333	0.1738	100.084		0.983646	0.00147621	0.321304	0.0067085	0.00398245	1.69159	0.00469203	3.0134	84.0377		n.a.	n.a.	n.a.	n.a.	n.a.	n.a.	n.a.		26-02-2016	40	15
2996.22	ML-05	Ol-2 C	136	39.0317	0.0207	15.0006	0.3683	0.1955	45.1591	0.2122	99.9881		0.983984	0.000412588	0.316253	0.0074682	0.00417449	1.69717	0.00573157	3.01519	84.2927		n.a.	n.a.	n.a.	n.a.	n.a.	n.a.	n.a.		26-02-2016	40	15
2996.22	ML-05	Ol-2 C	140	39.15	0.0244	14.5966	0.3405	0.2062	45.1152	0.2545	99.6874		0.98775	0.000486722	0.30798	0.00690997	0.00440646	1.69686	0.00687956	3.01128	84.6382		n.a.	n.a.	n.a.	n.a.	n.a.	n.a.	n.a.		26-02-2016	40	15
2996.22	ML-05	Ol-2 C	144	38.9277	0.0369	14.7726	0.3333	0.2009	45.0553	0.2272	99.5539		0.984605	0.000737913	0.312476	0.00678082	0.00430397	1.69886	0.006157	3.01392	84.4643		n.a.	n.a.	n.a.	n.a.	n.a.	n.a.	n.a.		26-02-2016	40	15
2996.22	ML-05	Ol-2 C	148	39.0801	0.0593	14.8381	0.319	0.2378	44.9176	0.2403	99.6922		0.986954	0.00118405	0.313383	0.00648001	0.00508673	1.69109	0.00650208	3.01068	84.3658		n.a.	n.a.	n.a.	n.a.	n.a.	n.a.	n.a.		26-02-2016	40	15
2996.22	ML-05	Ol-2 C	152	39.1565	0.0689	14.6938	0.3154	0.2273	45.1242	0.2413	99.8274		0.986689	0.00137269	0.309647	0.00639267	0.00485134	1.6951	0.00651466	3.01057	84.5543		n.a.	n.a.	n.a.	n.a.	n.a.	n.a.	n.a.		26-02-2016	40	15
2996.22	ML-05	Ol-2 C	156	39.0638	0.0356	14.7451	0.3076	0.1921	44.9128	0.2273	99.4843		0.988012	0.00071189	0.311883	0.00625774	0.00411529	1.69343	0.00615949	3.01056	84.4471		n.a.	n.a.	n.a.	n.a.	n.a.	n.a.	n.a.		26-02-2016	40	15
2996.22	ML-05	Ol-2 C	160	38.9699	0.0554	14.7326	0.2718	0.2238	44.753	0.2207	99.2272		0.988127	0.00111063	0.312406	0.00554341	0.0048065	1.69166	0.00599575	3.00965	84.4114		n.a.	n.a.	n.a.	n.a.	n.a.	n.a.	n.a.		26-02-2016	40	15
2996.22	ML-05	Ol-2 C	164	39.094	0.0377	14.8494	0.354	0.1867	45.0063	0.2206	99.7487		0.986794	0.000752373	0.313459	0.00718726	0.00399159	1.69355	0.00596595	3.0117	84.3818		n.a.	n.a.	n.a.	n.a.	n.a.	n.a.	n.a.		26-02-2016	40	15
2996.22	ML-05	Ol-2 C	168	39.0337	0.0147	14.7509	0.3104	0.2326	44.78	0.2207	99.343		0.98896	0.000294464	0.312546	0.00632564	0.00499154	1.69134	0.005991	3.01045	84.403		n.a.	n.a.	n.a.	n.a.	n.a.	n.a.	n.a.		26-02-2016	40	15
2996.22	ML-05	Ol-2 C	172	39.0572	0.0194	14.5373	0.3047	0.1727	44.946	0.2152	99.2525		0.989143	0.00038845	0.307892	0.0062069	0.00370456	1.69691	0.00583926	3.01008	84.6423		n.a.	n.a.	n.a.	n.a.	n.a.	n.a.	n.a.		26-02-2016	40	15
2996.22	ML-05	Ol-2 C	176	38.8775	0.0499	14.6465	0.3411	0.2097	44.8043	0.2151	99.1441		0.986757	0.00100135	0.310886	0.00696366	0.00450813	1.69527	0.00584938	3.01124	84.5034		n.a.	n.a.	n.a.	n.a.	n.a.	n.a.	n.a.		26-02-2016	40	15
2996.22	ML-05	Ol-1 B	0	38.6059	0.076	15.4053	0.2942	0.1547	43.8943	0.2454	98.6758		0.98773	0.00153735	0.329618	0.0060544	0.00335244	1.67418	0.00672693	3.0092	83.5503		n.a.	n.a.	n.a.	n.a.	n.a.	n.a.	n.a.		26-02-2016	40	15
2996.22	ML-05	Ol-1 B	5.1	38.6329	0.0597	14.7844	0.3486	0.1689	44.2093	0.2428	98.4466		0.988303	0.00120749	0.316295	0.00717305	0.00365972	1.68599	0.00665486	3.00928	84.2033		n.a.	n.a.	n.a.	n.a.	n.a.	n.a.	n.a.		26-02-2016	40	15
2996.22	ML-05	Ol-1 B	10.05	38.6828	0.0686	14.6394	0.3194	0.2887	44.7007	0.2092	98.9088		0.984704	0.00138066	0.31165	0.00653983	0.00622472	1.69633	0.00570567	3.01254	84.4794		n.a.	n.a.	n.a.	n.a.	n.a.	n.a.	n.a.		26-02-2016	40	15
2996.22	ML-05	Ol-1 B	15.03	38.8375	0.0762	14.3104	0.386	0.2043	45.2184	0.2066	99.2394		0.983613	0.00152582	0.303096	0.00786329	0.00438255	1.70725	0.0056061	3.01334	84.9232		n.a.	n.a.	n.a.	n.a.	n.a.	n.a.	n.a.		26-02-2016	40	15
2996.22	ML-05	Ol-1 B	20.02	39.0828	0.1021	13.7251	0.3819	0.2027	45.4432	0.232	99.1698		0.987199	0.00203901	0.289928	0.00775912	0.00433669	1.71118	0.00627863	3.00872	85.5116		n.a.	n.a.	n.a.	n.a.	n.a.	n.a.	n.a.		26-02-2016	40	15
2996.22	ML-05	Ol-1 B	25.01	39.222	0.0949	13.294	0.3921	0.1271	45.9877	0.2154	99.3332		0.986734	0.00188761	0.279693	0.00793434	0.00270833	1.72473	0.00580595	3.00949	86.0462		n.a.	n.a.	n.a.	n.a.	n.a.	n.a.	n.a.		26-02-2016	40	15
2996.22	ML-05	Ol-1 B	30.01	39.2665	0.0617	13.1718	0.4222	0.1959	45.9844	0.2014	99.3039		0.988036	0.00122747	0.277173	0.00854501	0.00417514	1.72492	0.0054296	3.00951	86.1558		n.a.	n.a.	n.a.	n.a.	n.a.	n.a.	n.a.		26-02-2016	40	15
2996.22	ML-05	Ol-1 B	35	39.2867	0.1057	13.0196	0.3629	0.1942	46.3154	0.2352	99.5197		0.985457	0.00209625	0.273115	0.00732189	0.00412598	1.73191	0.00632102	3.01035	86.3785		n.a.	n.a.	n.a.	n.a.	n.a.	n.a.	n.a.		26-02-2016	40	15
2996.22	ML-05	Ol-1 B	40	39.1341	0.1193	12.7491	0.3365	0.1537	46.8554	0.2006	99.5487		0.980318	0.0023628	0.267084	0.00678017	0.00326115	1.74977	0.00538394	3.01496	86.7574		n.a.	n.a.	n.a.	n.a.	n.a.	n.a.	n.a.		26-02-2016	40	15
2996.22	ML-05	Ol-1 B	45	39.2374	0.0981	12.6639	0.3708	0.1749	46.6396	0.2137	99.3984		0.983997	0.00194508	0.265593	0.00747958	0.00371509	1.74364	0.0057419	3.01211	86.7814		n.a.	n.a.	n.a.	n.a.	n.a.	n.a.	n.a.		26-02-2016	40	15
2996.22	ML-05	Ol-1 B	50	39.3626	0.0955	12.4674	0.3889	0.1467	46.9027	0.2204	99.5842		0.984237	0.00188797	0.260704	0.00782164	0.00310693	1.74833	0.00590453	3.01199	87.0234		n.a.	n.a.	n.a.	n.a.	n.a.	n.a.	n.a.		26-02-2016	40	15
2996.22	ML-05	Ol-1 B	54.99	39.5559	0.1028	11.9667	0.4449	0.1946	46.8508	0.2252	99.3409		0.989079	0.0020323	0.250236	0.008948	0.00412143	1.74641	0.00603317	3.00686	87.4672		n.a.	n.a.	n.a.	n.a.	n.a.	n.a.	n.a.		26-02-2016	40	15
2996.22	ML-05	Ol-1 B	59.99	39.5785	0.0601	12.0179	0.3954	0.1751	46.9807	0.2844	99.4921		0.988486	0.00118675	0.251013	0.00794313	0.0037041	1.7492	0.00761024	3.00914	87.4507		n.a.	n.a.	n.a.	n.a.	n.a.	n.a.	n.a.		26-02-2016	40	15
2996.22	ML-05	Ol-1 B	64.99	39.2972	0.0575	11.9646	0.422	0.1575	47.201	0.3032	99.403		0.983045	0.00113725	0.250303	0.00849119	0.00333717	1.76024	0.00812641	3.01468	87.5505		n.a.	n.a.	n.a.	n.a.	n.a.	n.a.	n.a.		26-02-2016	40	15
2996.22	ML-05	Ol-1 B	69.99	39.5218	0.1017	12.2258	0.3654	0.1468	47.0029	0.2327	99.5971		0.986523	0.00200709	0.255214	0.0073364	0.00310372	1.74906	0.00622335	3.00946	87.2665		n.a.	n.a.	n.a.	n.a.	n.a.	n.a.	n.a.		26-02-2016	40	15
2996.22	ML-05	Ol-1 B	74.98	39.43	0.054	11.9739	0.4428	0.1751	47.2988	0.2093	99.5839		0.984263	0.00106575	0.249963	0.0088907	0.00370217	1.76012	0.00559772	3.01361	87.5646		n.a.	n.a.	n.a.	n.a.	n.a.	n.a.	n.a.		26-02-2016	40	15
2996.22	ML-05	Ol-1 B	79.98	39.5283	0.0768	11.7724	0.4536	0.1628	47.2266	0.215	99.4355		0.986847	0.00151593	0.245789	0.00910874	0.00344256	1.75767	0.00575092	3.01012	87.7318		n.a.	n.a.	n.a.	n.a.	n.a.	n.a.	n.a.		26-02-2016	40	15
2996.22	ML-05	Ol-1 B	84.98	39.4439	0.088	11.9223	0.3468	0.1716	47.312	0.214	99.4986		0.98455	0.00173666	0.248871	0.00696275	0.00362795	1.76051	0.00572307	3.01198	87.6145		n.a.	n.a.	n.a.	n.a.	n.a.	n.a.	n.a.		26-02-2016	40	15
2996.22	ML-05	Ol-1 B	89.98	39.3828	0.0916	11.8646	0.3877	0.1699	47.2583	0.2206	99.3755		0.984274	0.00181001	0.247981	0.0077938	0.00359657	1.76074	0.00590708	3.01211	87.6548		n.a.	n.a.	n.a.	n.a.	n.a.	n.a.	n.a.		26-02-2016	40	15
2996.22	ML-05	Ol-1 B	94.98	39.4937	0.0435	11.8119	0.4235	0.1593	47.2851	0.2225	99.4395		0.986273	0.000858883	0.246686	0.0085068	0.00336954	1.76036	0.00595329	3.01201	87.709		n.a.	n.a.	n.a.	n.a.	n.a.	n.a.	n.a.		26-02-2016	40	15
2996.22	ML-05	Ol-1 B	99.97	39.2567	0.0676	11.8201	0.3754	0.1787	47.3037	0.199	99.2012		0.982991	0.00133831	0.247522	0.00756091	0.00379006	1.76579	0.00533884	3.01433	87.7058		n.a.	n.a.	n.a.	n.a.	n.a.	n.a.	n.a.		26-02-2016	40	15
2996.22	ML-05	Ol-1 B	104.97	39.5036	0.0807	11.9803	0.3733	0.115	47.2883	0.2056	99.5468		0.98555	0.00159181	0.249957	0.00749107	0.00243011	1.75875	0.0054957	3.01127	87.5563		n.a.	n.a.	n.a.	n.a.	n.a.	n.a.	n.a.		26-02-2016	40	15
2996.22	ML-05	Ol-1 B	109.97	39.447	0.0773	11.6308	0.4608	0.1681	47.285	0.2019	99.2709		0.986026	0.00152767	0.243131	0.00926469	0.003559	1.762	0.00540715	3.01092	87.8746		n.a.	n.a.	n.a.	n.a.	n.a.	n.a.	n.a.		26-02-2016	40	15
2996.22	ML-05	Ol-1 B	114.97	39.4734	0.1258	11.3768	0.4365	0.1523	47.3161	0.2255	99.1064		0.986722	0.00248626	0.23783	0.00877644	0.0032246	1.76323	0.00603941	3.00831	88.1148		n.a.	n.a.	n.a.	n.a.	n.a.	n.a.	n.a.		26-02-2016	40	15
2996.22	ML-05	Ol-1 B	119.97	39.5411	0.0545	11.7532	0.3512	0.1558	47.5211	0.2028	99.5797		0.985356	0.00107378	0.244938	0.00703952	0.0032885	1.76539	0.00541465	3.0125	87.816		n.a.	n.a.	n.a.	n.a.	n.a.	n.a.	n.a.		26-02-2016	40	15
2996.22	ML-05	Ol-1 B	124.97	39.6449	0.0809	11.5629	0.4523	0.1257	47.5197	0.2273	99.6137		0.986768	0.00159203	0.240686	0.00905521	0.00265002	1.76323	0.00606157	3.01005	87.9892		n.a.	n.a.	n.a.	n.a.	n.a.	n.a.	n.a.		26-02-2016	40	15
2996.22	ML-05	Ol-1 B	129.97	39.4633	0.0832	11.6055	0.3712	0.1806	47.3343	0.2695	99.3076		0.985757	0.00164314	0.242436	0.0074581	0.00382103	1.76263	0.00721262	3.01096	87.9088		n.a.	n.a.	n.a.	n.a.	n.a.	n.a.	n.a.		26-02-2016	40	15
2996.22	ML-05	Ol-1 B	134.96	39.4757	0.0666	11.7788	0.4063	0.1416	47.5336	0.2009	99.6035		0.983921	0.00131244	0.24552	0.00814557	0.00298937	1.7662	0.00536498	3.01345	87.7955		n.a.	n.a.	n.a.	n.a.	n.a.	n.a.	n.a.		26-02-2016	40	15
2996.22	ML-05	Ol-1 B	139.96	39.3321	0.0935	11.7246	0.3712	0.1257	47.4817	0.2564	99.3852		0.982352	0.00184632	0.244892	0.00745713	0.00265914	1.76789	0.00686113	3.01396	87.8332		n.a.	n.a.	n.a.	n.a.	n.a.	n.a.	n.a.		26-02-2016	40	15
2996.22	ML-05	Ol-1 B	144.96	39.5979	0.1133	11.611	0.3992	0.1381	47.6315	0.2489	99.7399		0.984492	0.00222713	0.241416	0.00798315	0.00290817	1.7654	0.00663014	3.01105	87.9702		n.a.	n.a.	n.a.	n.a.	n.a.	n.a.	n.a.		26-02-2016	40	15
2996.22	ML-05	Ol-1 B	149.96	39.5711	0.1054	11.7467	0.3948	0.177	47.5285	0.2272	99.7507		0.984475	0.00207321	0.244399	0.00790038	0.0037298	1.76274	0.0060561	3.01138	87.8236		n.a.	n.a.	n.a.	n.a.	n.a.	n.a.	n.a.		26-02-2016	40	15
2996.22	ML-05	Ol-1 B	154.96	39.4759	0.0861	11.6474	0.372	0.1823	47.685	0.2423	99.691		0.982618	0.00169446	0.242459	0.007448	0.00384348	1.76947	0.00646195	3.01399	87.9489		n.a.	n.a.	n.a.	n.a.	n.a.	n.a.	n.a.		26-02-2016	40	15
2996.22	ML-05	Ol-1 B	159.96	39.242	0.0935	11.6346	0.4042	0.131	47.516	0.1934	99.2147		0.981577	0.0018491	0.243378	0.0081323	0.00277543	1.77183	0.00518308	3.01472	87.9229		n.a.	n.a.	n.a.	n.a.	n.a.	n.a.	n.a.		26-02-2016	40	15
2996.22	ML-05	Ol-1 B	164.95	39.4914	0.0962	11.4938	0.3978	0.1611	47.5301	0.1982	99.3686		0.985142	0.00189735	0.239782	0.00798188	0.00340391	1.76756	0.00529734	3.01106	88.0548		n.a.	n.a.	n.a.	n.a.	n.a.	n.a.	n.a.		26-02-2016	40	15
2996.22	ML-05	Ol-1 B	169.95	39.5101	0.0895	11.6456	0.372	0.1788	47.7332	0.2254	99.7546		0.9827	0.00175999	0.242232	0.00744217	0.00376674	1.76987	0.00600654	3.01378	87.9613		n.a.	n.a.	n.a.	n.a.	n.a.	n.a.	n.a.		26-02-2016	40	15
2996.22	ML-05	Ol-1 B	174.95	39.3978	0.1045	11.7445	0.3963	0.1611	47.4451	0.1831	99.4324		0.983433	0.00206236	0.245168	0.00795684	0.00340607	1.76552	0.00489687	3.01244	87.8068		n.a.	n.a.	n.a.	n.a.	n.a.	n.a.	n.a.		26-02-2016	40	15
2996.22	ML-05	Ol-1 B	179.95	39.6267	0.1231	11.5195	0.3728	0.1452	47.4451	0.2161	99.4485		0.987195	0.00242465	0.239996	0.00747025	0.00306385	1.76204	0.00576803	3.00796	88.0124		n.a.	n.a.	n.a.	n.a.	n.a.	n.a.	n.a.		26-02-2016	40	15
2996.22	ML-05	Ol-1 B	184.95	39.4131	0.1198	11.4303	0.3906	0.1434	47.3625	0.2273	99.087		0.985606	0.00236862	0.239043	0.00785668	0.00303737	1.76566	0.00609003	3.00966	88.0759		n.a.	n.a.	n.a.	n.a.	n.a.	n.a.	n.a.		26-02-2016	40	15
2996.22	ML-05	Ol-1 B	189.95	39.2977	0.0773	11.5471	0.4322	0.1593	47.7045	0.2395	99.4576		0.980661	0.00152513	0.24098	0.00867522	0.00336708	1.77468	0.00640346	3.01629	88.0446		n.a.	n.a.	n.a.	n.a.	n.a.	n.a.	n.a.		26-02-2016	40	15
2996.22	ML-05	Ol-1 B	194.95	39.4584	0.0989	11.5481	0.3584	0.1399	47.4654	0.1954	99.2645		0.985323	0.00195259	0.24116	0.00719865	0.00295898	1.76695	0.00522783	3.01077	87.9907		n.a.	n.a.	n.a.	n.a.	n.a.	n.a.	n.a.		26-02-2016	40	15
2996.22	ML-05	Ol-1 B	199.94	39.2081	0.0576	11.5773	0.3913	0.1699	47.6886	0.216	99.3088		0.980097	0.00113839	0.242023	0.00786768	0.00359726	1.77712	0.00578502	3.01763	88.0136		n.a.	n.a.	n.a.	n.a.	n.a.	n.a.	n.a.		26-02-2016	40	15
2996.22	ML-05	Ol-1 B	204.94	39.3764	0.0604	11.7015	0.4163	0.1734	47.7705	0.2047	99.7032		0.980748	0.00118942	0.243736	0.00834011	0.00365811	1.77374	0.00546257	3.01687	87.9188		n.a.	n.a.	n.a.	n.a.	n.a.	n.a.	n.a.		26-02-2016	40	15
2996.22	ML-05	Ol-1 B	209.94	39.0925	0.084	11.6099	0.4307	0.1717	47.2875	0.2272	98.9035		0.981464	0.00166738	0.243762	0.00869761	0.00365121	1.76985	0.00611149	3.0152	87.8943		n.a.	n.a.	n.a.	n.a.	n.a.	n.a.	n.a.		26-02-2016	40	15
2996.22	ML-05	Ol-1 B	214.94	39.2755	0.1026	11.6534	0.3705	0.1593	47.7557	0.2047	99.5217		0.979533	0.00202311	0.243056	0.0074324	0.00336511	1.77554	0.00546982	3.01642	87.9592		n.a.	n.a.	n.a.	n.a.	n.a.	n.a.	n.a.		26-02-2016	40	15
2996.22	ML-05	Ol-1 B	219.94	39.6955	0.1044	11.715	0.4178	0.0956	47.5811	0.2395	99.8489		0.985969	0.00205021	0.243344	0.00834708	0.00201125	1.76183	0.00637361	3.00993	87.8642		n.a.	n.a.	n.a.	n.a.	n.a.	n.a.	n.a.		26-02-2016	40	15
2996.22	ML-05	Ol-1 B	224.94	39.4222	0.0876	11.5695	0.3756	0.1328	47.6726	0.2405	99.5008		0.982678	0.00172643	0.24118	0.00753078	0.00280385	1.77153	0.00642308	3.01387	88.0171		n.a.	n.a.	n.a.	n.a.	n.a.	n.a.	n.a.		26-02-2016	40	15
2996.22	ML-05	Ol-1 B	229.93	39.2355	0.1213	11.5338	0.4243	0.1859	47.7896	0.2488	99.5392		0.978365	0.00239143	0.240519	0.00851018	0.00392633	1.77649	0.00664706	3.01685	88.0755		n.a.	n.a.	n.a.	n.a.	n.a.	n.a.	n.a.		26-02-2016	40	15
2996.22	ML-05	Ol-1 B	234.93	39.4756	0.1402	11.5907	0.3734	0.1275	47.9175	0.2029	99.8278		0.980539	0.00275334	0.24077	0.00746027	0.00268245	1.77435	0.00539978	3.01395	88.0518		n.a.	n.a.	n.a.	n.a.	n.a.	n.a.	n.a.		26-02-2016	40	15
2996.22	ML-05	Ol-1 B	239.93	39.2884	0.1142	11.8015	0.4228	0.1699	47.7017	0.2328	99.7313		0.978769	0.00224935	0.245872	0.00847217	0.00358505	1.77157	0.00621379	3.01673	87.8127		n.a.	n.a.	n.a.	n.a.	n.a.	n.a.	n.a.		26-02-2016	40	15
2996.22	ML-05	Ol-1 B	244.93	39.3563	0.0567	11.6207	0.3563	0.1204	47.674	0.2377	99.4221		0.982194	0.00111877	0.242533	0.00715225	0.00254504	1.77367	0.00635579	3.01557	87.9708		n.a.	n.a.	n.a.	n.a.	n.a.	n.a.	n.a.		26-02-2016	40	15
2996.22	ML-05	Ol-1 B	249.93	39.2901	0.1158	11.5973	0.4135	0.1434	47.7993	0.2169	99.5763		0.979208	0.00228179	0.241716	0.00828918	0.0030271	1.77591	0.00579174	3.01623	88.0198		n.a.	n.a.	n.a.	n.a.	n.a.	n.a.	n.a.		26-02-2016	40	15
2996.22	ML-05	Ol-1 B	254.93	39.3954	0.0973	11.6433	0.3548	0.1505	47.5565	0.201	99.3988		0.98315	0.00191983	0.243	0.00712199	0.00318124	1.76926	0.00537437	3.01301	87.924		n.a.	n.a.	n.a.	n.a.	n.a.	n.a.	n.a.		26-02-2016	40	15
2996.22	ML-05	Ol-1 B	259.92	39.2147	0.0996	11.5457	0.3749	0.1363	47.4429	0.2264	99.0405		0.982167	0.00197229	0.241831	0.00755259	0.00289147	1.7714	0.00607534	3.01389	87.9879		n.a.	n.a.	n.a.	n.a.	n.a.	n.a.	n.a.		26-02-2016	40	15
2996.22	ML-05	Ol-1 B	264.92	39.5478	0.0919	11.8483	0.4077	0.1752	47.679	0.215	99.9649		0.982512	0.00180512	0.246166	0.00814704	0.00368668	1.76584	0.00572284	3.01388	87.7652		n.a.	n.a.	n.a.	n.a.	n.a.	n.a.	n.a.		26-02-2016	40	15
2996.22	ML-05	Ol-1 B	269.92	39.4749	0.0816	11.4265	0.4135	0.1859	47.5118	0.2226	99.3168		0.985293	0.00161031	0.238514	0.00830163	0.00393015	1.76789	0.00595288	3.01149	88.1124		n.a.	n.a.	n.a.	n.a.	n.a.	n.a.	n.a.		26-02-2016	40	15
2996.22	ML-05	Ol-1 B	274.92	39.4934	0.0826	11.6553	0.3942	0.1575	47.7204	0.2235	99.7269		0.98267	0.00162494	0.242528	0.00788939	0.00331932	1.77009	0.00595824	3.01408	87.9496		n.a.	n.a.	n.a.	n.a.	n.a.	n.a.	n.a.		26-02-2016	40	15
2996.22	ML-05	Ol-1 B	279.92	39.4075	0.0743	11.6046	0.4035	0.1487	47.7192	0.2526	99.6104		0.981781	0.00146352	0.241781	0.0080858	0.00313785	1.7723	0.00674259	3.01529	87.9955		n.a.	n.a.	n.a.	n.a.	n.a.	n.a.	n.a.		26-02-2016	40	15
2996.22	ML-05	Ol-14 B	0	39.8667	0.046	13.5244	0.341	0.1947	46.5577	0.2675	100.798		0.988726	0.000901984	0.280504	0.00680243	0.00408994	1.72134	0.007108	3.00947	85.9877		n.a.	n.a.	n.a.	n.a.	n.a.	n.a.	n.a.		26-02-2016	40	15
2996.22	ML-05	Ol-14 B	5	39.7947	0.0684	13.8147	0.3435	0.2317	46.8265	0.2685	101.348		0.983361	0.00133635	0.285486	0.00682745	0.00484953	1.725	0.00710869	3.01397	85.8001		n.a.	n.a.	n.a.	n.a.	n.a.	n.a.	n.a.		26-02-2016	40	15
2996.22	ML-05	Ol-14 B	9.99	39.578	0.025	14.0295	0.3311	0.1701	46.1159	0.2624	100.512		0.98706	0.000492953	0.292609	0.00664191	0.00359319	1.71455	0.0070115	3.01195	85.4217		n.a.	n.a.	n.a.	n.a.	n.a.	n.a.	n.a.		26-02-2016	40	15
2996.22	ML-05	Ol-14 B	14.99	39.5988	0.0397	14.1414	0.305	0.2226	46.199	0.2319	100.738		0.985829	0.000781422	0.29442	0.0061075	0.00469386	1.71459	0.00618554	3.01261	85.345		n.a.	n.a.	n.a.	n.a.	n.a.	n.a.	n.a.		26-02-2016	40	15
2996.22	ML-05	Ol-14 B	19.99	39.5635	0.0177	14.1562	0.3225	0.1939	46.0657	0.2664	100.586		0.986684	0.000349005	0.295247	0.0064693	0.00409588	1.71265	0.00711828	3.01262	85.2957		n.a.	n.a.	n.a.	n.a.	n.a.	n.a.	n.a.		26-02-2016	40	15
2996.22	ML-05	Ol-14 B	24.98	39.5511	0.0639	14.1688	0.3317	0.2044	46.24	0.2641	100.824		0.984111	0.00125708	0.294832	0.00663857	0.00430777	1.71519	0.00704063	3.01338	85.3319		n.a.	n.a.	n.a.	n.a.	n.a.	n.a.	n.a.		26-02-2016	40	15
2996.22	ML-05	Ol-14 B	29.98	39.3361	0.0494	14.1813	0.309	0.247	45.9801	0.2724	100.375		0.983746	0.000976774	0.296595	0.00621576	0.00523208	1.71423	0.00729889	3.0143	85.2501		n.a.	n.a.	n.a.	n.a.	n.a.	n.a.	n.a.		26-02-2016	40	15
2996.22	ML-05	Ol-14 B	34.98	39.6808	0.0746	14.8796	0.3349	0.2444	46.0309	0.2373	101.482		0.983818	0.00146234	0.308519	0.00667872	0.00513241	1.70134	0.00630361	3.01326	84.6498		n.a.	n.a.	n.a.	n.a.	n.a.	n.a.	n.a.		26-02-2016	40	15
2996.22	ML-05	Ol-14 B	39.97	39.5971	0.0431	14.744	0.3296	0.2217	45.8216	0.2685	101.026		0.98576	0.000848322	0.306958	0.00659993	0.00467476	1.70054	0.0071616	3.01254	84.7094		n.a.	n.a.	n.a.	n.a.	n.a.	n.a.	n.a.		26-02-2016	40	15
2996.22	ML-05	Ol-14 B	44.97	39.361	0.047	14.5585	0.285	0.177	45.6401	0.2599	100.328		0.985844	0.000930712	0.30494	0.00574157	0.00375492	1.70411	0.00697439	3.01229	84.8217		n.a.	n.a.	n.a.	n.a.	n.a.	n.a.	n.a.		26-02-2016	40	15
2996.22	ML-05	Ol-14 B	49.97	39.1828	0.0377	14.8237	0.3332	0.2354	45.5507	0.2501	100.414		0.982687	0.000747543	0.310908	0.00672154	0.00500048	1.70303	0.00672034	3.01582	84.5622		n.a.	n.a.	n.a.	n.a.	n.a.	n.a.	n.a.		26-02-2016	40	15
2996.22	ML-05	Ol-14 B	54.96	39.3292	0.0267	15.1577	0.2931	0.2106	45.2958	0.266	100.579		0.985556	0.000528997	0.317655	0.0059078	0.00447003	1.69213	0.00714176	3.01339	84.1946		n.a.	n.a.	n.a.	n.a.	n.a.	n.a.	n.a.		26-02-2016	40	15
2996.22	ML-05	Ol-14 B	59.96	39.5016	0.0225	15.1095	0.3181	0.275	45.4601	0.2625	100.949		0.986106	0.000444086	0.315439	0.00638729	0.0058147	1.69179	0.00702095	3.01301	84.2849		n.a.	n.a.	n.a.	n.a.	n.a.	n.a.	n.a.		26-02-2016	40	15
2996.22	ML-05	Ol-14 B	64.96	39.557	0.0385	15.1823	0.3297	0.2242	45.199	0.2692	100.8		0.988761	0.000760859	0.317367	0.00662873	0.00474667	1.68424	0.00720942	3.00972	84.1444		n.a.	n.a.	n.a.	n.a.	n.a.	n.a.	n.a.		26-02-2016	40	15
2996.22	ML-05	Ol-14 B	69.95	39.6402	0.0379	15.3595	0.3544	0.1866	45.4231	0.2557	101.257		0.987011	0.000746107	0.31983	0.0070978	0.00393535	1.68605	0.00682142	3.0115	84.0554		n.a.	n.a.	n.a.	n.a.	n.a.	n.a.	n.a.		26-02-2016	40	15
2996.22	ML-05	Ol-14 B	74.95	39.3163	0.0405	15.4672	0.3458	0.2294	45.1324	0.2506	100.782		0.984838	0.000802089	0.324011	0.00696725	0.00486711	1.68535	0.0067256	3.01356	83.8749		n.a.	n.a.	n.a.	n.a.	n.a.	n.a.	n.a.		26-02-2016	40	15
2996.22	ML-05	Ol-14 B	79.95	39.4244	0.077	15.5156	0.3738	0.1737	45.1962	0.2631	101.024		0.984912	0.00152089	0.324158	0.0075113	0.00367551	1.68323	0.00704224	3.01205	83.8517		n.a.	n.a.	n.a.	n.a.	n.a.	n.a.	n.a.		26-02-2016	40	15
2996.22	ML-05	Ol-14 B	84.94	39.3498	0.0619	15.5798	0.3876	0.2038	45.0863	0.2473	100.916		0.984742	0.00122475	0.32606	0.00780203	0.00431986	1.68203	0.00663074	3.01281	83.7627		n.a.	n.a.	n.a.	n.a.	n.a.	n.a.	n.a.		26-02-2016	40	15
2996.22	ML-05	Ol-14 B	89.94	39.5007	0.0657	15.4724	0.3879	0.2389	45.1609	0.2403	101.067		0.98633	0.00129705	0.323096	0.00779078	0.00505265	1.68108	0.00642878	3.01108	83.8789		n.a.	n.a.	n.a.	n.a.	n.a.	n.a.	n.a.		26-02-2016	40	15
2996.22	ML-05	Ol-14 B	94.94	39.7311	0.0485	15.4923	0.3113	0.248	45.1689	0.2563	101.256		0.989539	0.000955036	0.322682	0.00623628	0.00523166	1.67707	0.00683925	3.00855	83.8639		n.a.	n.a.	n.a.	n.a.	n.a.	n.a.	n.a.		26-02-2016	40	15
2996.22	ML-05	Ol-14 B	99.93	39.3011	0.0223	15.5521	0.3219	0.1954	44.9676	0.2591	100.62		0.986231	0.00044244	0.326377	0.00649739	0.00415321	1.68222	0.00696625	3.01288	83.751		n.a.	n.a.	n.a.	n.a.	n.a.	n.a.	n.a.		26-02-2016	40	15
2996.22	ML-05	Ol-14 B	104.93	39.5536	0	15.7909	0.401	0.1741	45.246	0.2616	101.427		0.985672	0	0.329086	0.00803775	0.00367478	1.68087	0.0069846	3.01433	83.6272		n.a.	n.a.	n.a.	n.a.	n.a.	n.a.	n.a.		26-02-2016	40	15
2996.22	ML-05	Ol-14 B	109.93	39.2466	0.0303	15.3215	0.3509	0.2208	44.7512	0.2699	100.191		0.988267	0.00060324	0.322649	0.00710722	0.00470931	1.67991	0.0072817	3.01053	83.8882		n.a.	n.a.	n.a.	n.a.	n.a.	n.a.	n.a.		26-02-2016	40	15
2996.22	ML-05	Ol-14 B	114.92	39.4125	0.0604	15.8201	0.3968	0.25	45.1088	0.2573	101.306		0.983766	0.00119198	0.330235	0.00796661	0.00528547	1.67852	0.00688106	3.01385	83.5603		n.a.	n.a.	n.a.	n.a.	n.a.	n.a.	n.a.		26-02-2016	40	15
2996.22	ML-05	Ol-14 B	119.92	39.345	0.0436	16.111	0.3606	0.2422	45.0127	0.2563	101.371		0.982766	0.000861038	0.336542	0.00724486	0.00512413	1.67612	0.00685909	3.01551	83.2787		n.a.	n.a.	n.a.	n.a.	n.a.	n.a.	n.a.		26-02-2016	40	15
2996.22	ML-05	Ol-14 B	124.92	39.7161	0.0421	15.6364	0.3342	0.2559	45.2805	0.2392	101.504		0.987638	0.00082773	0.32518	0.00668469	0.00538998	1.67861	0.00637309	3.01071	83.7718		n.a.	n.a.	n.a.	n.a.	n.a.	n.a.	n.a.		26-02-2016	40	15
2996.22	ML-05	Ol-14 B	129.91	39.3501	0.0606	15.7363	0.3293	0.2452	45.0796	0.261	101.062		0.984003	0.00119812	0.329086	0.00662348	0.00519346	1.6805	0.00699276	3.0136	83.6242		n.a.	n.a.	n.a.	n.a.	n.a.	n.a.	n.a.		26-02-2016	40	15
2996.22	ML-05	Ol-14 B	134.91	39.6411	0.024	15.8961	0.3306	0.2559	44.8872	0.2547	101.29		0.989145	0.000473479	0.331712	0.0066353	0.00540842	1.66973	0.00680927	3.00991	83.4263		n.a.	n.a.	n.a.	n.a.	n.a.	n.a.	n.a.		26-02-2016	40	15
2996.22	ML-05	Ol-14 B	139.91	39.4112	0.0261	15.7724	0.325	0.2284	44.6469	0.2553	100.665		0.989231	0.000517957	0.331079	0.00656153	0.00485579	1.67062	0.00686573	3.00973	83.4601		n.a.	n.a.	n.a.	n.a.	n.a.	n.a.	n.a.		26-02-2016	40	15
2996.22	ML-05	Ol-14 B	144.9	39.2035	0.05	15.7607	0.3294	0.3002	44.6793	0.259	100.582		0.985576	0.000993826	0.331357	0.0066609	0.00639236	1.67448	0.00697626	3.01244	83.4803		n.a.	n.a.	n.a.	n.a.	n.a.	n.a.	n.a.		26-02-2016	40	15
2996.22	ML-05	Ol-14 B	149.9	39.7537	0.0057	15.6184	0.3532	0.1908	45.1	0.2579	101.28		0.990513	0.000112288	0.325443	0.0070786	0.00402668	1.6752	0.0068848	3.00926	83.7331		n.a.	n.a.	n.a.	n.a.	n.a.	n.a.	n.a.		26-02-2016	40	15
2996.22	ML-05	Ol-14 B	154.9	38.952	0.038	16.0421	0.2882	0.2328	44.9832	0.2524	100.789		0.978886	0.000755025	0.337147	0.0058256	0.00495531	1.68524	0.00679594	3.0196	83.3292		n.a.	n.a.	n.a.	n.a.	n.a.	n.a.	n.a.		26-02-2016	40	15
2996.22	ML-05	Ol-14 B	159.89	39.3472	0.0668	16.1667	0.3632	0.2076	44.9477	0.2524	101.352		0.982957	0.00131939	0.337752	0.00729811	0.00439272	1.67393	0.00675566	3.0144	83.2104		n.a.	n.a.	n.a.	n.a.	n.a.	n.a.	n.a.		26-02-2016	40	15
2996.22	ML-05	Ol-14 B	164.89	39.1435	0.0161	15.713	0.3301	0.2053	44.8053	0.2597	100.473		0.984881	0.000320277	0.330628	0.00668057	0.00437521	1.68059	0.0070009	3.01448	83.5608		n.a.	n.a.	n.a.	n.a.	n.a.	n.a.	n.a.		26-02-2016	40	15
2996.22	ML-05	Ol-14 B	169.89	39.5079	0.089	16.0329	0.3542	0.2411	45.0947	0.2635	101.583		0.983812	0.00175224	0.333884	0.00709448	0.00508523	1.67403	0.00703018	3.01268	83.3715		n.a.	n.a.	n.a.	n.a.	n.a.	n.a.	n.a.		26-02-2016	40	15
2996.22	ML-05	Ol-14 B	174.88	39.3738	0.0642	15.9	0.3698	0.1739	44.9962	0.2603	101.138		0.98435	0.00126897	0.332426	0.00743624	0.00368237	1.67698	0.00697227	3.01311	83.4565		n.a.	n.a.	n.a.	n.a.	n.a.	n.a.	n.a.		26-02-2016	40	15
2996.22	ML-05	Ol-14 B	179.88	39.5515	0.0316	15.8515	0.362	0.1966	45.0153	0.2489	101.257		0.987147	0.000623565	0.330861	0.00726727	0.00415612	1.6749	0.00665582	3.01161	83.5044		n.a.	n.a.	n.a.	n.a.	n.a.	n.a.	n.a.		26-02-2016	40	15
2996.22	ML-05	Ol-14 B	184.88	39.358	0.0315	15.7444	0.3343	0.2625	44.9569	0.2516	100.939		0.985561	0.000623644	0.32971	0.00673334	0.00556757	1.67825	0.00675023	3.01319	83.5798		n.a.	n.a.	n.a.	n.a.	n.a.	n.a.	n.a.		26-02-2016	40	15
2996.22	ML-05	Ol-14 B	189.87	39.4448	0.0217	15.6762	0.4035	0.1758	44.9553	0.2536	100.931		0.987269	0.000429419	0.328128	0.00812331	0.00372692	1.67739	0.00680069	3.01187	83.6388		n.a.	n.a.	n.a.	n.a.	n.a.	n.a.	n.a.		26-02-2016	40	15
2996.22	ML-05	Ol-14 B	194.87	39.1336	0.0505	15.8239	0.3607	0.1989	44.7821	0.2484	100.598		0.983846	0.00100379	0.332695	0.00729403	0.00423543	1.67838	0.00669093	3.01415	83.4568		n.a.	n.a.	n.a.	n.a.	n.a.	n.a.	n.a.		26-02-2016	40	15
2996.22	ML-05	Ol-14 B	199.87	39.3772	0.0254	15.6301	0.3807	0.2321	44.8623	0.2668	100.775		0.987184	0.000503457	0.327696	0.0076768	0.00492849	1.67665	0.00716633	3.01181	83.6508		n.a.	n.a.	n.a.	n.a.	n.a.	n.a.	n.a.		26-02-2016	40	15
2996.22	ML-05	Ol-14 B	204.86	39.3461	0.0399	15.6466	0.3412	0.2094	44.9342	0.2631	100.781		0.986168	0.000790674	0.327963	0.00687863	0.00444541	1.67894	0.00706525	3.01225	83.6582		n.a.	n.a.	n.a.	n.a.	n.a.	n.a.	n.a.		26-02-2016	40	15
2996.22	ML-05	Ol-14 B	209.86	39.4501	0.0416	15.9693	0.3355	0.2402	45.1013	0.2472	101.385		0.984239	0.000820581	0.333192	0.00673269	0.00507588	1.67745	0.00660783	3.01412	83.4286		n.a.	n.a.	n.a.	n.a.	n.a.	n.a.	n.a.		26-02-2016	40	15
2996.22	ML-05	Ol-14 B	214.86	39.0969	0.0205	16.2936	0.3086	0.2292	44.8978	0.2618	101.108		0.980343	0.00040641	0.341671	0.00622408	0.00486784	1.6783	0.00703336	3.01884	83.0853		n.a.	n.a.	n.a.	n.a.	n.a.	n.a.	n.a.		26-02-2016	40	15
2996.22	ML-05	Ol-14 B	219.85	39.2254	0.0402	15.8829	0.3372	0.2592	45.1472	0.2456	101.138		0.981331	0.000795151	0.332303	0.00678547	0.00549249	1.68379	0.00658316	3.01708	83.5175		n.a.	n.a.	n.a.	n.a.	n.a.	n.a.	n.a.		26-02-2016	40	15
2996.22	ML-05	Ol-14 B	224.85	39.4303	0.0303	16.1143	0.3304	0.2131	44.9567	0.2634	101.338		0.984792	0.000598318	0.336575	0.0066374	0.004508	1.67385	0.00704835	3.01401	83.2585		n.a.	n.a.	n.a.	n.a.	n.a.	n.a.	n.a.		26-02-2016	40	15
2996.22	ML-05	Ol-14 B	229.85	39.2156	0.0685	15.6784	0.3209	0.1993	44.9218	0.2531	100.658		0.984258	0.0013593	0.329085	0.00647834	0.00423685	1.6808	0.00680613	3.01302	83.6267		n.a.	n.a.	n.a.	n.a.	n.a.	n.a.	n.a.		26-02-2016	40	15
2996.22	ML-05	Ol-14 B	234.84	39.1302	0.0634	15.786	0.3665	0.251	44.8552	0.2554	100.708		0.982789	0.00125896	0.331571	0.00740399	0.00533959	1.67946	0.00687269	3.01469	83.5124		n.a.	n.a.	n.a.	n.a.	n.a.	n.a.	n.a.		26-02-2016	40	15
2996.22	ML-05	Ol-14 B	239.84	39.2069	0.051	15.9493	0.3545	0.2553	44.8892	0.2636	100.97		0.982777	0.00101074	0.334341	0.00714748	0.00542037	1.67742	0.00707939	3.0152	83.3807		n.a.	n.a.	n.a.	n.a.	n.a.	n.a.	n.a.		26-02-2016	40	15
2996.22	ML-05	Ol-14 B	244.84	39.5549	0.0496	15.7661	0.3408	0.2509	44.8426	0.256	101.061		0.98873	0.000980245	0.329578	0.00685206	0.00531207	1.671	0.00685607	3.00931	83.5259		n.a.	n.a.	n.a.	n.a.	n.a.	n.a.	n.a.		26-02-2016	40	15
2996.22	ML-05	Ol-14 B	249.83	39.2556	0.0509	15.7301	0.3552	0.1886	44.7525	0.258	100.591		0.986173	0.00101098	0.330475	0.00717742	0.00401309	1.67601	0.0069443	3.01181	83.5297		n.a.	n.a.	n.a.	n.a.	n.a.	n.a.	n.a.		26-02-2016	40	15
2996.22	ML-05	Ol-14 B	254.83	39.353	0.0576	15.6727	0.3742	0.2317	44.8838	0.2599	100.833		0.986066	0.00114111	0.328419	0.00754182	0.00491745	1.67659	0.00697738	3.01165	83.6201		n.a.	n.a.	n.a.	n.a.	n.a.	n.a.	n.a.		26-02-2016	40	15
2996.22	ML-05	Ol-14 B	259.83	39.5676	0.0627	16.007	0.3782	0.2432	45.1437	0.2707	101.673		0.984457	0.00123339	0.333061	0.00756872	0.00512515	1.67441	0.00721611	3.01308	83.409		n.a.	n.a.	n.a.	n.a.	n.a.	n.a.	n.a.		26-02-2016	40	15
2996.22	ML-05	Ol-5 B	0	39.5266	0.0493	13.8569	0.2851	0.1965	46.5941	0.2494	100.758		0.982746	0.000969113	0.28812	0.00570155	0.00413809	1.727	0.00664364	3.01532	85.702		n.a.	n.a.	n.a.	n.a.	n.a.	n.a.	n.a.		26-02-2016	40	15
2996.22	ML-05	Ol-5 B	5.09	39.4426	0.046	13.8424	0.3108	0.1429	46.1692	0.2696	100.223		0.985709	0.000908901	0.289301	0.00624753	0.00302483	1.72006	0.00721873	3.01247	85.6023		n.a.	n.a.	n.a.	n.a.	n.a.	n.a.	n.a.		26-02-2016	40	15
2996.22	ML-05	Ol-5 B	10.03	39.6004	0.0405	14.2622	0.3418	0.1653	46.2885	0.2496	100.948		0.984401	0.000795981	0.296493	0.00683421	0.00348041	1.71535	0.00664775	3.01401	85.2626		n.a.	n.a.	n.a.	n.a.	n.a.	n.a.	n.a.		26-02-2016	40	15
2996.22	ML-05	Ol-5 B	15	39.4455	0.0594	14.2911	0.2985	0.1889	46.2443	0.2616	100.789		0.982435	0.00116968	0.297665	0.00597991	0.00398496	1.71701	0.00698074	3.01523	85.2252		n.a.	n.a.	n.a.	n.a.	n.a.	n.a.	n.a.		26-02-2016	40	15
2996.22	ML-05	Ol-5 B	19.98	39.4432	0.013	14.3858	0.3367	0.1923	45.3898	0.2628	100.024		0.990235	0.000258039	0.302034	0.00679913	0.00408913	1.69876	0.00706886	3.00925	84.9043		n.a.	n.a.	n.a.	n.a.	n.a.	n.a.	n.a.		26-02-2016	40	15
2996.22	ML-05	Ol-5 B	24.96	39.448	0.0771	14.954	0.3593	0.2627	46.1781	0.2459	101.525		0.978857	0.0015126	0.310318	0.00717126	0.00552128	1.7082	0.00653748	3.01812	84.6264		n.a.	n.a.	n.a.	n.a.	n.a.	n.a.	n.a.		26-02-2016	40	15
2996.22	ML-05	Ol-5 B	29.95	39.6218	0.032	14.5323	0.3538	0.2642	45.7564	0.2571	100.818		0.987653	0.000630661	0.302943	0.00709369	0.00557813	1.70032	0.00686642	3.01109	84.8775		n.a.	n.a.	n.a.	n.a.	n.a.	n.a.	n.a.		26-02-2016	40	15
2996.22	ML-05	Ol-5 B	34.93	39.3312	0.0767	14.7099	0.3397	0.2363	45.6719	0.2708	100.636		0.983307	0.00151608	0.307551	0.00683111	0.00500382	1.7022	0.00725368	3.01366	84.697		n.a.	n.a.	n.a.	n.a.	n.a.	n.a.	n.a.		26-02-2016	40	15
2996.22	ML-05	Ol-5 B	39.92	39.1967	0.0668	14.9465	0.352	0.2135	45.6583	0.2522	100.686		0.980829	0.00132159	0.31278	0.00708485	0.00452509	1.70323	0.00676155	3.01653	84.4851		n.a.	n.a.	n.a.	n.a.	n.a.	n.a.	n.a.		26-02-2016	40	15
2996.22	ML-05	Ol-5 B	44.9	39.3602	0.0401	15.0341	0.3336	0.2329	45.7442	0.2403	100.985		0.982132	0.000791102	0.313723	0.00669549	0.0049223	1.7016	0.00642427	3.01629	84.4331		n.a.	n.a.	n.a.	n.a.	n.a.	n.a.	n.a.		26-02-2016	40	15
2996.22	ML-05	Ol-5 B	49.89	39.3222	0.0744	15.1129	0.3143	0.1935	45.2141	0.2605	100.492		0.985773	0.00147464	0.316842	0.00633763	0.00410871	1.68975	0.00699688	3.01128	84.2099		n.a.	n.a.	n.a.	n.a.	n.a.	n.a.	n.a.		26-02-2016	40	15
2996.22	ML-05	Ol-5 B	54.88	39.4264	0.037	15.3613	0.3286	0.2286	45.4453	0.2646	101.092		0.983959	0.000730074	0.320608	0.00659631	0.00483228	1.69078	0.00707518	3.01458	84.0604		n.a.	n.a.	n.a.	n.a.	n.a.	n.a.	n.a.		26-02-2016	40	15
2996.22	ML-05	Ol-5 B	59.86	39.5689	0.0772	15.3255	0.3409	0.2173	45.7104	0.2526	101.493		0.983019	0.00151635	0.318404	0.00681207	0.0045725	1.6929	0.00672355	3.01395	84.1693		n.a.	n.a.	n.a.	n.a.	n.a.	n.a.	n.a.		26-02-2016	40	15
2996.22	ML-05	Ol-5 B	64.85	39.264	0.0364	15.1681	0.3186	0.1958	45.2483	0.2866	100.518		0.984783	0.00072181	0.318151	0.0064274	0.00415953	1.69183	0.00770158	3.01377	84.1714		n.a.	n.a.	n.a.	n.a.	n.a.	n.a.	n.a.		26-02-2016	40	15
2996.22	ML-05	Ol-5 B	69.84	39.1733	0.0283	15.0895	0.3695	0.2484	45.5046	0.2485	100.662		0.981521	0.000560623	0.316184	0.00744676	0.00527165	1.6997	0.00667104	3.01736	84.3154		n.a.	n.a.	n.a.	n.a.	n.a.	n.a.	n.a.		26-02-2016	40	15
2996.22	ML-05	Ol-5 B	74.85	39.3688	0.0156	15.1876	0.3386	0.2323	45.3156	0.2466	100.705		0.985674	0.000308803	0.317999	0.00681886	0.00492625	1.69137	0.00661503	3.01371	84.1741		n.a.	n.a.	n.a.	n.a.	n.a.	n.a.	n.a.		26-02-2016	40	15
2996.22	ML-05	Ol-5 B	79.83	39.4069	0.0287	15.0643	0.2947	0.2382	45.4603	0.2525	100.746		0.98542	0.000567422	0.315032	0.00592752	0.00504518	1.69469	0.006765	3.01345	84.3246		n.a.	n.a.	n.a.	n.a.	n.a.	n.a.	n.a.		26-02-2016	40	15
2996.22	ML-05	Ol-5 B	84.82	39.2089	0.0442	15.7252	0.2973	0.1752	45.4691	0.2559	101.176		0.979495	0.000873002	0.328526	0.00597388	0.00370713	1.69333	0.00684929	3.01876	83.7513		n.a.	n.a.	n.a.	n.a.	n.a.	n.a.	n.a.		26-02-2016	40	15
2996.22	ML-05	Ol-5 B	89.81	39.3849	0.0469	15.5211	0.3157	0.2103	45.3712	0.255	101.105		0.983368	0.000925837	0.324089	0.00634023	0.00444745	1.68879	0.00682157	3.01478	83.8992		n.a.	n.a.	n.a.	n.a.	n.a.	n.a.	n.a.		26-02-2016	40	15
2996.22	ML-05	Ol-5 B	94.79	39.417	0.01	15.2891	0.35	0.2016	45.1739	0.2599	100.701		0.987164	0.000198007	0.320217	0.00705046	0.00427644	1.68656	0.0069738	3.01244	84.0432		n.a.	n.a.	n.a.	n.a.	n.a.	n.a.	n.a.		26-02-2016	40	15
2996.22	ML-05	Ol-5 B	99.78	39.5907	0.0419	15.5915	0.3408	0.1966	45.4141	0.2479	101.423		0.985286	0.000824439	0.324499	0.00682202	0.00414418	1.68488	0.00661003	3.01306	83.8508		n.a.	n.a.	n.a.	n.a.	n.a.	n.a.	n.a.		26-02-2016	40	15
2996.22	ML-05	Ol-5 B	104.77	39.4408	0.0489	15.3529	0.3295	0.2013	45.375	0.2581	101.007		0.984835	0.000965389	0.320601	0.00661785	0.00425743	1.68905	0.006905	3.01323	84.047		n.a.	n.a.	n.a.	n.a.	n.a.	n.a.	n.a.		26-02-2016	40	15
2996.22	ML-05	Ol-5 B	109.76	39.3513	0.0192	15.4604	0.37	0.2345	45.4201	0.2472	101.103		0.982866	0.000379151	0.322933	0.00743329	0.00496094	1.69119	0.00661518	3.01638	83.9666		n.a.	n.a.	n.a.	n.a.	n.a.	n.a.	n.a.		26-02-2016	40	15
2996.22	ML-05	Ol-5 B	114.74	39.5419	0.0331	15.0871	0.3359	0.227	45.2991	0.2461	100.77		0.988326	0.000654103	0.315359	0.006753	0.00480568	1.68788	0.0065904	3.01037	84.2575		n.a.	n.a.	n.a.	n.a.	n.a.	n.a.	n.a.		26-02-2016	40	15
2996.22	ML-05	Ol-5 B	119.73	39.4208	0.0632	15.192	0.3556	0.17	44.9815	0.242	100.425		0.988966	0.00125357	0.318733	0.00717566	0.00361236	1.68228	0.00650473	3.00853	84.0714		n.a.	n.a.	n.a.	n.a.	n.a.	n.a.	n.a.		26-02-2016	40	15
2996.22	ML-05	Ol-5 B	124.72	39.1411	0.0822	15.5957	0.3803	0.2315	45.1458	0.2509	100.828		0.981028	0.0016289	0.326896	0.00766688	0.00491457	1.68684	0.00673762	3.01571	83.7667		n.a.	n.a.	n.a.	n.a.	n.a.	n.a.	n.a.		26-02-2016	40	15
2996.22	ML-05	Ol-5 B	129.7	39.2556	0.0012	15.3657	0.3577	0.228	44.86	0.2488	100.317		0.987642	2.38701e-05	0.3233	0.0072387	0.00485868	1.68254	0.00670665	3.01231	83.8821		n.a.	n.a.	n.a.	n.a.	n.a.	n.a.	n.a.		26-02-2016	40	15
2996.22	ML-05	Ol-5 B	134.69	39.34	0.0634	15.7196	0.3458	0.1829	45.1053	0.253	101.01		0.98398	0.00125377	0.328813	0.00695698	0.00387482	1.68185	0.00678001	3.01351	83.6465		n.a.	n.a.	n.a.	n.a.	n.a.	n.a.	n.a.		26-02-2016	40	15
2996.22	ML-05	Ol-5 B	139.68	39.1928	0.0278	15.4191	0.3515	0.219	44.8071	0.2436	100.261		0.986775	0.000553391	0.324658	0.00711838	0.00467027	1.68177	0.00657123	3.01212	83.8191		n.a.	n.a.	n.a.	n.a.	n.a.	n.a.	n.a.		26-02-2016	40	15
2996.22	ML-05	Ol-5 B	144.68	39.5505	0.0302	15.5773	0.2943	0.2132	45.1804	0.2555	101.101		0.987257	0.000596019	0.325182	0.00590898	0.00450766	1.68127	0.00683324	3.01155	83.7932		n.a.	n.a.	n.a.	n.a.	n.a.	n.a.	n.a.		26-02-2016	40	15
2996.22	ML-05	Ol-5 B	149.67	39.1719	0.0642	15.1448	0.3559	0.2155	44.9232	0.2396	100.115		0.986345	0.0012781	0.318914	0.00720819	0.00459607	1.68629	0.00646396	3.0111	84.0957		n.a.	n.a.	n.a.	n.a.	n.a.	n.a.	n.a.		26-02-2016	40	15
2996.22	ML-05	Ol-5 B	154.66	39.4314	0.0271	15.662	0.3901	0.285	45.2279	0.2635	101.287		0.984022	0.000534697	0.326863	0.00783038	0.00602412	1.68259	0.00704533	3.01491	83.7337		n.a.	n.a.	n.a.	n.a.	n.a.	n.a.	n.a.		26-02-2016	40	15
2996.22	ML-05	Ol-5 B	159.65	39.4291	0.0578	15.6035	0.3079	0.2278	45.2929	0.2312	101.15		0.984168	0.00114066	0.325709	0.00618167	0.00481606	1.68535	0.00618298	3.01355	83.8041		n.a.	n.a.	n.a.	n.a.	n.a.	n.a.	n.a.		26-02-2016	40	15
2996.22	ML-05	Ol-5 B	164.63	39.5577	0.0471	15.7895	0.3554	0.1812	44.755	0.2488	100.935		0.989829	0.000931806	0.33041	0.00715304	0.00384037	1.66947	0.00667017	3.00831	83.4785		n.a.	n.a.	n.a.	n.a.	n.a.	n.a.	n.a.		26-02-2016	40	15
2996.22	ML-05	Ol-5 B	169.62	39.4726	0.0277	15.6923	0.3379	0.2295	44.9588	0.2548	100.974		0.987455	0.000547869	0.328295	0.00679914	0.00486284	1.67666	0.00682934	3.01145	83.6258		n.a.	n.a.	n.a.	n.a.	n.a.	n.a.	n.a.		26-02-2016	40	15
2996.22	ML-05	Ol-5 B	174.61	39.3141	0.0245	15.7421	0.2943	0.2383	44.742	0.2465	100.602		0.987459	0.000486533	0.330666	0.00594573	0.00506968	1.67531	0.00663354	3.01157	83.5159		n.a.	n.a.	n.a.	n.a.	n.a.	n.a.	n.a.		26-02-2016	40	15
2996.22	ML-05	Ol-5 B	179.59	38.5465	0.0481	15.6596	0.3392	0.2198	44.7591	0.2477	99.82		0.977391	0.000964282	0.332063	0.00691804	0.0047206	1.69189	0.00672926	3.02068	83.5934		n.a.	n.a.	n.a.	n.a.	n.a.	n.a.	n.a.		26-02-2016	40	15
2996.22	ML-05	Ol-5 B	184.58	39.3386	0.0779	15.7742	0.3486	0.2607	44.8639	0.2481	100.912		0.985299	0.00154263	0.330409	0.00702296	0.00553065	1.67515	0.00665784	3.01162	83.5254		n.a.	n.a.	n.a.	n.a.	n.a.	n.a.	n.a.		26-02-2016	40	15
2996.22	ML-05	Ol-5 B	189.57	39.5132	0.0433	15.3489	0.3885	0.228	45.0368	0.2443	100.803		0.988622	0.000856548	0.32116	0.0078185	0.0048318	1.67983	0.00654892	3.00966	83.9499		n.a.	n.a.	n.a.	n.a.	n.a.	n.a.	n.a.		26-02-2016	40	15
2996.22	ML-05	Ol-5 B	194.56	39.6173	0.009	15.7871	0.3537	0.2167	44.916	0.2388	101.139		0.989557	0.000177735	0.329772	0.00710616	0.00458459	1.6725	0.00639069	3.01009	83.5301		n.a.	n.a.	n.a.	n.a.	n.a.	n.a.	n.a.		26-02-2016	40	15
2996.22	ML-05	Ol-5 B	199.54	39.393	0.0381	15.7131	0.3319	0.2716	45.0011	0.2501	100.999		0.985638	0.000753701	0.328788	0.00667959	0.00575591	1.67853	0.00670455	3.01285	83.6206		n.a.	n.a.	n.a.	n.a.	n.a.	n.a.	n.a.		26-02-2016	40	15
2996.22	ML-05	Ol-5 B	204.53	39.4617	0.0508	15.8635	0.34	0.2161	44.9402	0.2472	101.12		0.986377	0.00100394	0.331606	0.00683581	0.00457517	1.6746	0.00662023	3.01162	83.471		n.a.	n.a.	n.a.	n.a.	n.a.	n.a.	n.a.		26-02-2016	40	15
2996.22	ML-05	Ol-5 B	209.52	39.1634	0.0288	15.8768	0.3462	0.2466	44.788	0.2542	100.704		0.984001	0.000572115	0.333606	0.00699658	0.005248	1.67759	0.00684303	3.01485	83.4125		n.a.	n.a.	n.a.	n.a.	n.a.	n.a.	n.a.		26-02-2016	40	15
2996.22	ML-05	Ol-4 B	0	39.7678	0.0747	12.5656	0.4005	0.2133	47.6186	0.2509	100.891		0.982037	0.00145845	0.259499	0.00795504	0.00446142	1.753	0.00663826	3.01505	87.1056		n.a.	n.a.	n.a.	n.a.	n.a.	n.a.	n.a.		26-02-2016	40	15
2996.22	ML-05	Ol-4 B	6	39.8485	0.0793	12.0639	0.4141	0.2009	47.9144	0.2349	100.756		0.982955	0.00154657	0.248866	0.0082162	0.00419747	1.76196	0.00620815	3.01395	87.6237		n.a.	n.a.	n.a.	n.a.	n.a.	n.a.	n.a.		26-02-2016	40	15
2996.22	ML-05	Ol-4 B	12	39.9401	0.0962	12.1079	0.4736	0.2376	48.0472	0.2215	101.124		0.98205	0.00187014	0.248971	0.00936656	0.00494831	1.76117	0.0058352	3.01421	87.6142		n.a.	n.a.	n.a.	n.a.	n.a.	n.a.	n.a.		26-02-2016	40	15
2996.22	ML-05	Ol-4 B	18	39.8301	0.123	11.9469	0.443	0.1213	48.3211	0.2237	101.009		0.979366	0.00239119	0.245666	0.00876156	0.00252627	1.77125	0.00589328	3.01585	87.8197		n.a.	n.a.	n.a.	n.a.	n.a.	n.a.	n.a.		26-02-2016	40	15
2996.22	ML-05	Ol-4 B	24	40.1925	0.0764	11.7781	0.43	0.2157	48.2865	0.2256	101.205		0.985291	0.00148077	0.241463	0.00847875	0.00447873	1.76463	0.00592538	3.01175	87.9635		n.a.	n.a.	n.a.	n.a.	n.a.	n.a.	n.a.		26-02-2016	40	15
2996.22	ML-05	Ol-4 B	30	39.9983	0.0772	11.4115	0.4632	0.154	48.1394	0.2229	100.466		0.986217	0.00150495	0.235304	0.00918635	0.00321616	1.76946	0.00588842	3.01077	88.2627		n.a.	n.a.	n.a.	n.a.	n.a.	n.a.	n.a.		26-02-2016	40	15
2996.22	ML-05	Ol-4 B	36	40.0654	0.0914	11.4445	0.4666	0.1601	48.2058	0.1961	100.63		0.986207	0.00177877	0.235587	0.0092382	0.00333792	1.76891	0.00517171	3.01023	88.2471		n.a.	n.a.	n.a.	n.a.	n.a.	n.a.	n.a.		26-02-2016	40	15
2996.22	ML-05	Ol-4 B	42	39.9885	0.0581	11.2556	0.4473	0.1246	48.0728	0.2243	100.171		0.987989	0.00113493	0.232564	0.00888914	0.00260748	1.77062	0.00593751	3.00974	88.3903		n.a.	n.a.	n.a.	n.a.	n.a.	n.a.	n.a.		26-02-2016	40	15
2996.22	ML-05	Ol-4 B	48.01	40.1763	0.1138	11.294	0.4458	0.1515	48.7525	0.2175	101.151		0.983111	0.00220166	0.231119	0.00877439	0.00314001	1.77844	0.0057023	3.01249	88.499		n.a.	n.a.	n.a.	n.a.	n.a.	n.a.	n.a.		26-02-2016	40	15
2996.22	ML-05	Ol-4 B	54.01	39.8882	0.1232	11.3419	0.4254	0.183	48.2798	0.2184	100.46		0.983324	0.00240126	0.233827	0.00843517	0.00382111	1.7743	0.00576849	3.01187	88.356		n.a.	n.a.	n.a.	n.a.	n.a.	n.a.	n.a.		26-02-2016	40	15
2996.22	ML-05	Ol-4 B	60.01	40.0519	0.1284	11.3317	0.4593	0.2061	48.5755	0.2098	100.963		0.982457	0.00249018	0.232456	0.00906214	0.00428208	1.7763	0.00551383	3.01256	88.4278		n.a.	n.a.	n.a.	n.a.	n.a.	n.a.	n.a.		26-02-2016	40	15
2996.22	ML-05	Ol-4 B	66.01	40.2733	0.1002	11.3909	0.3987	0.1381	48.1883	0.1958	100.685		0.989546	0.00194653	0.234063	0.00787968	0.00287407	1.7651	0.00515453	3.00656	88.2919		n.a.	n.a.	n.a.	n.a.	n.a.	n.a.	n.a.		26-02-2016	40	15
2996.22	ML-05	Ol-4 B	72.01	40.1249	0.1332	11.2686	0.4457	0.1817	48.4247	0.2007	100.779		0.985224	0.00258583	0.231391	0.00880253	0.00377887	1.77254	0.0052799	3.0096	88.4531		n.a.	n.a.	n.a.	n.a.	n.a.	n.a.	n.a.		26-02-2016	40	15
2996.22	ML-05	Ol-4 B	78.01	40.0776	0.168	11.341	0.4214	0.1528	48.5756	0.2092	100.946		0.982624	0.00325664	0.232537	0.00831044	0.00317318	1.77547	0.00549547	3.01086	88.4195		n.a.	n.a.	n.a.	n.a.	n.a.	n.a.	n.a.		26-02-2016	40	15
2996.22	ML-05	Ol-4 B	84.01	39.8224	0.1304	11.4349	0.4545	0.1563	48.4201	0.1998	100.618		0.980776	0.00253919	0.235521	0.00900368	0.00326052	1.77777	0.00527224	3.01415	88.3017		n.a.	n.a.	n.a.	n.a.	n.a.	n.a.	n.a.		26-02-2016	40	15
2996.22	ML-05	Ol-4 B	90.01	39.8849	0.1657	11.3759	0.4026	0.1815	48.4153	0.2147	100.641		0.981422	0.00322363	0.234093	0.00796828	0.00378277	1.77598	0.00566027	3.01213	88.354		n.a.	n.a.	n.a.	n.a.	n.a.	n.a.	n.a.		26-02-2016	40	15
2996.22	ML-05	Ol-4 B	96.01	40.0634	0.2094	11.4847	0.3871	0.1926	48.3246	0.2226	100.884		0.983262	0.00406325	0.23572	0.00764168	0.00400372	1.76807	0.00585335	3.00861	88.2362		n.a.	n.a.	n.a.	n.a.	n.a.	n.a.	n.a.		26-02-2016	40	15
2996.22	ML-05	Ol-4 B	102.01	40.0561	0.2802	11.3448	0.4182	0.1901	48.6273	0.2008	101.117		0.980154	0.00542087	0.232155	0.00823102	0.00393997	1.77384	0.00526438	3.009	88.4269		n.a.	n.a.	n.a.	n.a.	n.a.	n.a.	n.a.		26-02-2016	40	15
2996.22	ML-05	Ol-4 B	108.01	40.0137	0.4	11.117	0.4323	0.145	48.4442	0.2007	100.753		0.980863	0.00775238	0.227899	0.00852371	0.0030106	1.77031	0.00527114	3.00363	88.5948		n.a.	n.a.	n.a.	n.a.	n.a.	n.a.	n.a.		26-02-2016	40	15
2996.22	ML-05	Ol-4 B	114.01	40.1618	0.2956	11.1284	0.4347	0.184	48.4811	0.2035	100.889		0.983583	0.00572371	0.227922	0.0085631	0.00381682	1.77002	0.00533974	3.00497	88.5922		n.a.	n.a.	n.a.	n.a.	n.a.	n.a.	n.a.		26-02-2016	40	15
2996.22	ML-05	Ol-4 B	120.01	40.0961	0.2093	11.3421	0.4501	0.1452	48.3125	0.2042	100.76		0.984556	0.00406334	0.23291	0.00888979	0.00301989	1.76851	0.0053722	3.00732	88.3627		n.a.	n.a.	n.a.	n.a.	n.a.	n.a.	n.a.		26-02-2016	40	15
2996.22	ML-05	Ol-4 B	126.01	40.139	0.1638	11.3323	0.4615	0.1583	48.246	0.2261	100.727		0.986129	0.00318168	0.232831	0.00911974	0.00329408	1.767	0.00595148	3.00751	88.3575		n.a.	n.a.	n.a.	n.a.	n.a.	n.a.	n.a.		26-02-2016	40	15
2996.22	ML-05	Ol-4 B	132.01	40.1292	0.1647	11.3719	0.4571	0.1523	48.3449	0.1932	100.813		0.985166	0.00319682	0.233474	0.00902619	0.0031669	1.76933	0.00508176	3.00844	88.3426		n.a.	n.a.	n.a.	n.a.	n.a.	n.a.	n.a.		26-02-2016	40	15
2996.22	ML-05	Ol-4 B	138.01	40.3069	0.1287	11.246	0.4141	0.1546	48.4782	0.2107	100.939		0.987411	0.00249271	0.230395	0.00815957	0.00320785	1.77041	0.0055302	3.0076	88.4849		n.a.	n.a.	n.a.	n.a.	n.a.	n.a.	n.a.		26-02-2016	40	15
2996.22	ML-05	Ol-4 B	144.01	40.2965	0.121	11.2145	0.4389	0.1769	48.3149	0.2063	100.769		0.98882	0.00234753	0.230137	0.00866282	0.00367674	1.76742	0.00542384	3.00649	88.4791		n.a.	n.a.	n.a.	n.a.	n.a.	n.a.	n.a.		26-02-2016	40	15
2996.22	ML-05	Ol-4 B	150.01	40.0949	0.1421	11.3836	0.4382	0.1122	48.4086	0.2116	100.791		0.984608	0.00275895	0.233781	0.00865547	0.00233374	1.77217	0.00556734	3.00987	88.3456		n.a.	n.a.	n.a.	n.a.	n.a.	n.a.	n.a.		26-02-2016	40	15
2996.22	ML-05	Ol-4 B	156.02	39.9509	0.1272	11.2973	0.4044	0.1787	48.6113	0.2219	100.792		0.981392	0.00247046	0.232085	0.00799045	0.00371814	1.78017	0.00584024	3.01367	88.4664		n.a.	n.a.	n.a.	n.a.	n.a.	n.a.	n.a.		26-02-2016	40	15
2996.22	ML-05	Ol-4 B	162.02	40.2169	0.1498	11.2243	0.4042	0.1565	48.4485	0.2147	100.815		0.98638	0.00290485	0.230224	0.007974	0.00325114	1.77143	0.0056419	3.00781	88.4983		n.a.	n.a.	n.a.	n.a.	n.a.	n.a.	n.a.		26-02-2016	40	15
2996.22	ML-05	Ol-4 B	168.02	39.9056	0.1123	11.3008	0.4013	0.1963	48.168	0.2037	100.288		0.985064	0.00219172	0.23329	0.0079679	0.00410428	1.77255	0.0053874	3.01055	88.3695		n.a.	n.a.	n.a.	n.a.	n.a.	n.a.	n.a.		26-02-2016	40	15
2996.22	ML-05	Ol-4 B	174.02	40.0875	0.1296	11.2124	0.4314	0.1307	48.555	0.2078	100.754		0.984204	0.00251569	0.230213	0.00851923	0.00271793	1.77713	0.00546612	3.01076	88.5314		n.a.	n.a.	n.a.	n.a.	n.a.	n.a.	n.a.		26-02-2016	40	15
2996.22	ML-05	Ol-4 B	180.02	39.9934	0.103	11.3207	0.389	0.1709	48.2571	0.208	100.442		0.985552	0.0020068	0.233303	0.00771053	0.00356713	1.7728	0.00549177	3.01043	88.3704		n.a.	n.a.	n.a.	n.a.	n.a.	n.a.	n.a.		26-02-2016	40	15
2996.22	ML-05	Ol-4 B	186.02	40.1462	0.1228	11.2881	0.4134	0.1546	48.4459	0.2176	100.789		0.985535	0.00238342	0.231742	0.00816285	0.00321457	1.77294	0.00572327	3.0097	88.4399		n.a.	n.a.	n.a.	n.a.	n.a.	n.a.	n.a.		26-02-2016	40	15
2996.22	ML-05	Ol-4 B	192.02	40.1432	0.1123	11.3406	0.4222	0.19	48.5389	0.1979	100.945		0.984449	0.00217739	0.23258	0.00832805	0.00394658	1.77452	0.00519978	3.0112	88.4121		n.a.	n.a.	n.a.	n.a.	n.a.	n.a.	n.a.		26-02-2016	40	15
2996.22	ML-05	Ol-4 B	198.02	40.0519	0.0856	11.1762	0.4418	0.0921	48.4148	0.2222	100.485		0.985894	0.00166593	0.230069	0.00874736	0.00192023	1.77662	0.00586015	3.01077	88.5349		n.a.	n.a.	n.a.	n.a.	n.a.	n.a.	n.a.		26-02-2016	40	15
2996.22	ML-05	Ol-4 B	204.02	39.9659	0.14	11.6266	0.412	0.1625	48.6548	0.2041	101.166		0.979511	0.00271283	0.238302	0.00812196	0.00337333	1.77768	0.00535945	3.01506	88.1793		n.a.	n.a.	n.a.	n.a.	n.a.	n.a.	n.a.		26-02-2016	40	15
2996.22	ML-05	Ol-4 B	210.02	40.0403	0.1354	11.2839	0.4543	0.1746	48.5192	0.2085	100.816		0.983153	0.00262856	0.231707	0.00897244	0.00363123	1.77601	0.00548514	3.01159	88.4592		n.a.	n.a.	n.a.	n.a.	n.a.	n.a.	n.a.		26-02-2016	40	15
2996.22	ML-05	Ol-4 B	216.02	40.1751	0.1074	11.2308	0.4051	0.092	48.4904	0.1978	100.699		0.986494	0.00208505	0.230624	0.00800099	0.00191342	1.77501	0.00520381	3.00934	88.5012		n.a.	n.a.	n.a.	n.a.	n.a.	n.a.	n.a.		26-02-2016	40	15
2996.22	ML-05	Ol-4 B	222.02	40.3205	0.0856	11.3998	0.3911	0.1665	48.5187	0.1965	101.079		0.987198	0.00165702	0.233416	0.00770211	0.00345285	1.77091	0.00515464	3.00949	88.3544		n.a.	n.a.	n.a.	n.a.	n.a.	n.a.	n.a.		26-02-2016	40	15
2996.22	ML-05	Ol-4 B	228.02	39.7884	0.1061	11.4123	0.4418	0.132	48.4131	0.2074	100.501		0.981011	0.00206827	0.235313	0.00876167	0.00275662	1.77946	0.00547878	3.01485	88.3206		n.a.	n.a.	n.a.	n.a.	n.a.	n.a.	n.a.		26-02-2016	40	15
2996.22	ML-05	Ol-4 B	234.02	40.1304	0.0915	11.5143	0.4372	0.1672	48.4082	0.2045	100.953		0.984888	0.00177546	0.236323	0.00863053	0.00347564	1.77109	0.0053773	3.01156	88.2275		n.a.	n.a.	n.a.	n.a.	n.a.	n.a.	n.a.		26-02-2016	40	15
2996.22	ML-05	Ol-4 B	240.02	40.1496	0.1201	11.2158	0.4692	0.2006	48.4489	0.2161	100.82		0.985458	0.00233064	0.23022	0.00926315	0.00417036	1.77276	0.00568289	3.00988	88.5061		n.a.	n.a.	n.a.	n.a.	n.a.	n.a.	n.a.		26-02-2016	40	15
2996.22	ML-05	Ol-4 B	246.02	40.3759	0.084	11.5058	0.4259	0.1372	48.8025	0.2225	101.554		0.984638	0.0016196	0.234654	0.00835422	0.00283396	1.77421	0.00581356	3.01212	88.3191		n.a.	n.a.	n.a.	n.a.	n.a.	n.a.	n.a.		26-02-2016	40	15
2996.22	ML-05	Ol-4 B	252.02	40.1868	0.1099	11.3566	0.3866	0.175	48.4752	0.2136	100.904		0.985667	0.00213118	0.232944	0.00762698	0.00363555	1.77245	0.00561314	3.01007	88.3842		n.a.	n.a.	n.a.	n.a.	n.a.	n.a.	n.a.		26-02-2016	40	15
2996.22	ML-05	Ol-4 B	258.02	40.0717	0.1012	11.2774	0.4034	0.1528	48.6042	0.2151	100.826		0.983618	0.00196402	0.231502	0.00796469	0.00317686	1.77857	0.00565701	3.01245	88.4829		n.a.	n.a.	n.a.	n.a.	n.a.	n.a.	n.a.		26-02-2016	40	15
2996.22	ML-05	Ol-4 B	264.03	40.0412	0.091	11.3736	0.4432	0.1668	48.356	0.2113	100.683		0.984894	0.0017697	0.233957	0.00876852	0.00347508	1.77313	0.00556852	3.01157	88.3435		n.a.	n.a.	n.a.	n.a.	n.a.	n.a.	n.a.		26-02-2016	40	15
2996.22	ML-05	Ol-4 B	270.03	40.2219	0.126	11.4599	0.4282	0.1864	48.7233	0.2083	101.354		0.982899	0.0024344	0.234198	0.0084166	0.00385814	1.77497	0.00545373	3.01223	88.3435		n.a.	n.a.	n.a.	n.a.	n.a.	n.a.	n.a.		26-02-2016	40	15
2996.22	ML-05	Ol-4 B	276.03	40.0063	0.1071	11.2925	0.4489	0.149	48.5654	0.2091	100.778		0.982828	0.00208024	0.232004	0.00887039	0.00310042	1.77863	0.00550378	3.01301	88.4611		n.a.	n.a.	n.a.	n.a.	n.a.	n.a.	n.a.		26-02-2016	40	15
2996.22	ML-05	Ol-4 B	282.03	40.0978	0.109	11.555	0.4256	0.0698	48.5504	0.2236	101.031		0.983177	0.00211307	0.236939	0.00839376	0.00144961	1.77465	0.00587409	3.0126	88.2213		n.a.	n.a.	n.a.	n.a.	n.a.	n.a.	n.a.		26-02-2016	40	15
2996.22	ML-05	Ol-3 B	0	39.6313	0.0438	12.6533	0.3354	0.1786	46.9274	0.248	100.018		0.987126	0.000862549	0.263569	0.00671957	0.00376792	1.74249	0.00661826	3.01115	86.8613		n.a.	n.a.	n.a.	n.a.	n.a.	n.a.	n.a.		26-02-2016	40	15
2996.22	ML-05	Ol-3 B	4.99	39.7925	0.0662	12.6966	0.3462	0.1741	47.0286	0.2462	100.35		0.987663	0.00129909	0.263543	0.0069116	0.00366009	1.74012	0.00654716	3.00974	86.8469		n.a.	n.a.	n.a.	n.a.	n.a.	n.a.	n.a.		26-02-2016	40	15
2996.22	ML-05	Ol-3 B	9.99	39.4276	0.1066	12.6846	0.4088	0.1874	47.088	0.2325	100.135		0.981704	0.00209852	0.264127	0.00818719	0.00395217	1.74783	0.00620241	3.0141	86.8721		n.a.	n.a.	n.a.	n.a.	n.a.	n.a.	n.a.		26-02-2016	40	15
2996.22	ML-05	Ol-3 B	14.98	39.5514	0.0959	12.4748	0.4339	0.2328	46.8999	0.2299	99.9186		0.985877	0.00188997	0.260046	0.0086995	0.00491507	1.74278	0.00613985	3.01034	87.016		n.a.	n.a.	n.a.	n.a.	n.a.	n.a.	n.a.		26-02-2016	40	15
2996.22	ML-05	Ol-3 B	19.97	40.0378	0.0981	12.0023	0.4074	0.1474	47.7473	0.2223	100.663		0.98727	0.00191254	0.247506	0.00808036	0.00307857	1.75519	0.00587304	3.00891	87.6413		n.a.	n.a.	n.a.	n.a.	n.a.	n.a.	n.a.		26-02-2016	40	15
2996.22	ML-05	Ol-3 B	24.96	39.7981	0.0799	11.9796	0.3782	0.1483	47.1098	0.2205	99.7144		0.99062	0.00157241	0.249369	0.00757199	0.0031266	1.74809	0.00588046	3.00623	87.5157		n.a.	n.a.	n.a.	n.a.	n.a.	n.a.	n.a.		26-02-2016	40	15
2996.22	ML-05	Ol-3 B	29.95	39.7851	0.1125	11.8322	0.4186	0.2193	47.6462	0.2169	100.231		0.985291	0.00220278	0.245056	0.00833848	0.00460011	1.75906	0.00575521	3.0103	87.7724		n.a.	n.a.	n.a.	n.a.	n.a.	n.a.	n.a.		26-02-2016	40	15
2996.22	ML-05	Ol-3 B	34.95	39.7371	0.0865	11.9387	0.3758	0.1626	47.6403	0.2191	100.16		0.985063	0.00169535	0.247503	0.00749322	0.00341408	1.76056	0.00581926	3.01155	87.6745		n.a.	n.a.	n.a.	n.a.	n.a.	n.a.	n.a.		26-02-2016	40	15
2996.22	ML-05	Ol-3 B	39.94	39.8402	0.1022	11.936	0.4307	0.103	47.5847	0.2142	100.211		0.986721	0.00200124	0.247222	0.00858009	0.00216071	1.75691	0.00568395	3.00928	87.6644		n.a.	n.a.	n.a.	n.a.	n.a.	n.a.	n.a.		26-02-2016	40	15
2996.22	ML-05	Ol-3 B	44.93	39.8217	0.103	11.4719	0.4757	0.1518	47.5924	0.2214	99.8379		0.988261	0.00202099	0.238091	0.00949574	0.00319087	1.76075	0.0058869	3.0077	88.0885		n.a.	n.a.	n.a.	n.a.	n.a.	n.a.	n.a.		26-02-2016	40	15
2996.22	ML-05	Ol-3 B	49.92	40.0826	0.1126	11.5968	0.4316	0.1472	48.0324	0.2187	100.622		0.987003	0.00219218	0.238812	0.00854846	0.00307013	1.76322	0.00576991	3.00861	88.0715		n.a.	n.a.	n.a.	n.a.	n.a.	n.a.	n.a.		26-02-2016	40	15
2996.22	ML-05	Ol-3 B	54.92	39.7774	0.1058	11.612	0.4499	0.1415	48.0277	0.2049	100.319		0.983275	0.00206776	0.24005	0.00894538	0.00296265	1.76986	0.00542673	3.01259	88.0567		n.a.	n.a.	n.a.	n.a.	n.a.	n.a.	n.a.		26-02-2016	40	15
2996.22	ML-05	Ol-3 B	59.91	39.79	0.1043	11.3727	0.4327	0.1699	47.7368	0.2075	99.8139		0.987242	0.00204602	0.235977	0.00863536	0.0035705	1.76568	0.00551602	3.00867	88.2109		n.a.	n.a.	n.a.	n.a.	n.a.	n.a.	n.a.		26-02-2016	40	15
2996.22	ML-05	Ol-3 B	64.9	39.9121	0.0931	11.5743	0.4412	0.1247	47.7306	0.2167	100.093		0.988094	0.00182229	0.239632	0.00878563	0.00261484	1.76157	0.00574791	3.00826	88.0256		n.a.	n.a.	n.a.	n.a.	n.a.	n.a.	n.a.		26-02-2016	40	15
2996.22	ML-05	Ol-3 B	69.9	39.9495	0.0745	11.3251	0.4167	0.1851	48.1541	0.1894	100.294		0.986237	0.00145412	0.233813	0.00827442	0.00387046	1.7722	0.00500965	3.01085	88.3444		n.a.	n.a.	n.a.	n.a.	n.a.	n.a.	n.a.		26-02-2016	40	15
2996.22	ML-05	Ol-3 B	74.89	39.7456	0.1259	11.2791	0.4326	0.1572	47.7137	0.207	99.6611		0.98713	0.00247222	0.23427	0.00864203	0.00330692	1.7666	0.00550825	3.00793	88.2916		n.a.	n.a.	n.a.	n.a.	n.a.	n.a.	n.a.		26-02-2016	40	15
2996.22	ML-05	Ol-3 B	79.89	40.0513	0.1272	11.3084	0.4653	0.1573	47.8271	0.2012	100.138		0.989634	0.00248497	0.233677	0.00924772	0.0032921	1.76173	0.00532652	3.0054	88.2893		n.a.	n.a.	n.a.	n.a.	n.a.	n.a.	n.a.		26-02-2016	40	15
2996.22	ML-05	Ol-3 B	84.88	39.9367	0.0764	11.3927	0.4541	0.1524	48.089	0.2331	100.334		0.985997	0.00149132	0.235226	0.00901776	0.00318694	1.76994	0.00616599	3.01102	88.269		n.a.	n.a.	n.a.	n.a.	n.a.	n.a.	n.a.		26-02-2016	40	15
2996.22	ML-05	Ol-3 B	89.87	40.1457	0.1403	11.0722	0.36	0.1723	48.1207	0.2189	100.23		0.989479	0.00273401	0.228222	0.00713697	0.00359698	1.7681	0.00578057	3.00505	88.5679		n.a.	n.a.	n.a.	n.a.	n.a.	n.a.	n.a.		26-02-2016	40	15
2996.22	ML-05	Ol-3 B	94.86	40.0154	0.0861	11.1562	0.404	0.1473	48.1034	0.2136	100.126		0.988314	0.0016813	0.230431	0.00802589	0.00308146	1.77114	0.00565232	3.00832	88.4875		n.a.	n.a.	n.a.	n.a.	n.a.	n.a.	n.a.		26-02-2016	40	15
2996.22	ML-05	Ol-3 B	99.85	40.3108	0.0814	11.356	0.4032	0.1599	48.2629	0.2232	100.797		0.989471	0.00157973	0.233111	0.00796061	0.00332442	1.76605	0.00586994	3.00737	88.3396		n.a.	n.a.	n.a.	n.a.	n.a.	n.a.	n.a.		26-02-2016	40	15
2996.22	ML-05	Ol-3 B	104.85	40.2163	0.11	10.9326	0.4568	0.1365	48.0547	0.2262	100.133		0.991771	0.00214475	0.22547	0.00906107	0.0028512	1.76666	0.00597668	3.00394	88.682		n.a.	n.a.	n.a.	n.a.	n.a.	n.a.	n.a.		26-02-2016	40	15
2996.22	ML-05	Ol-3 B	109.84	39.9852	0.0983	11.1926	0.3954	0.1702	48.1573	0.228	100.227		0.986915	0.00191827	0.231029	0.00784984	0.00355816	1.77195	0.00602938	3.00925	88.4657		n.a.	n.a.	n.a.	n.a.	n.a.	n.a.	n.a.		26-02-2016	40	15
2996.22	ML-05	Ol-3 B	114.83	39.7345	0.0812	11.2328	0.4031	0.1814	48.1333	0.2064	99.9727		0.984076	0.00158998	0.232651	0.00803004	0.00380526	1.77711	0.00547682	3.01274	88.424		n.a.	n.a.	n.a.	n.a.	n.a.	n.a.	n.a.		26-02-2016	40	15
2996.22	ML-05	Ol-3 B	119.82	40.0431	0.1158	11.2093	0.4278	0.1469	48.211	0.2098	100.364		0.986894	0.00225645	0.231035	0.00848062	0.00306655	1.77132	0.00553995	3.00859	88.4619		n.a.	n.a.	n.a.	n.a.	n.a.	n.a.	n.a.		26-02-2016	40	15
2996.22	ML-05	Ol-3 B	124.82	39.8578	0.0953	11.4042	0.358	0.1218	48.2054	0.2356	100.278		0.984233	0.0018606	0.235508	0.00711069	0.00254752	1.77455	0.00623329	3.01205	88.2835		n.a.	n.a.	n.a.	n.a.	n.a.	n.a.	n.a.		26-02-2016	40	15
2996.22	ML-05	Ol-3 B	129.81	40.0707	0.1217	11.1596	0.417	0.1437	48.173	0.2185	100.304		0.987763	0.00237188	0.230054	0.0082681	0.00300033	1.77026	0.00577079	3.00749	88.4991		n.a.	n.a.	n.a.	n.a.	n.a.	n.a.	n.a.		26-02-2016	40	15
2996.22	ML-05	Ol-3 B	134.81	40.0222	0.1259	11.2534	0.4677	0.2105	48.3242	0.2087	100.613		0.984725	0.00244915	0.231555	0.00925604	0.00438684	1.7725	0.00550166	3.01038	88.4457		n.a.	n.a.	n.a.	n.a.	n.a.	n.a.	n.a.		26-02-2016	40	15
2996.22	ML-05	Ol-3 B	139.8	40.0405	0.1012	11.4167	0.4624	0.165	48.3656	0.218	100.769		0.984306	0.00196692	0.234708	0.00914308	0.00343558	1.77246	0.00574176	3.01176	88.3065		n.a.	n.a.	n.a.	n.a.	n.a.	n.a.	n.a.		26-02-2016	40	15
2996.22	ML-05	Ol-3 B	144.8	40.1043	0.0933	11.0297	0.4367	0.1271	48.2264	0.2185	100.236		0.988758	0.00181868	0.227415	0.00866017	0.00265418	1.77253	0.00577176	3.0076	88.6289		n.a.	n.a.	n.a.	n.a.	n.a.	n.a.	n.a.		26-02-2016	40	15
2996.22	ML-05	Ol-3 B	149.79	39.9068	0.0801	11.2548	0.4424	0.1468	47.9218	0.2339	99.9866		0.987874	0.0015677	0.232996	0.00880873	0.00307798	1.76846	0.00620358	3.00899	88.3587		n.a.	n.a.	n.a.	n.a.	n.a.	n.a.	n.a.		26-02-2016	40	15
2996.22	ML-05	Ol-3 B	154.78	40.0726	0.0711	11.4163	0.417	0.2219	48.2105	0.2285	100.638		0.986404	0.00138373	0.235011	0.00825633	0.00462648	1.76912	0.00602631	3.01083	88.2737		n.a.	n.a.	n.a.	n.a.	n.a.	n.a.	n.a.		26-02-2016	40	15
2996.22	ML-05	Ol-3 B	159.77	40.1725	0.0649	11.1358	0.3489	0.1325	48.0371	0.2194	100.111		0.991598	0.00126656	0.229871	0.0069271	0.00277018	1.76763	0.00580231	3.00587	88.4921		n.a.	n.a.	n.a.	n.a.	n.a.	n.a.	n.a.		26-02-2016	40	15
2996.22	ML-05	Ol-3 B	164.76	40.0645	0.1193	11.1649	0.4004	0.1912	48.5418	0.2067	100.689		0.984272	0.00231724	0.229386	0.00791213	0.00397859	1.77779	0.00544068	3.01109	88.5717		n.a.	n.a.	n.a.	n.a.	n.a.	n.a.	n.a.		26-02-2016	40	15
2996.22	ML-05	Ol-3 B	169.76	39.8351	0.1216	11.1455	0.4203	0.1905	48.2334	0.2241	100.171		0.984047	0.00237497	0.230253	0.00835128	0.00398594	1.77626	0.00593129	3.0112	88.5247		n.a.	n.a.	n.a.	n.a.	n.a.	n.a.	n.a.		26-02-2016	40	15
2996.22	ML-05	Ol-3 B	174.75	40.1362	0.1041	11.1827	0.4089	0.1763	48.2974	0.2185	100.524		0.98746	0.00202493	0.230084	0.00809178	0.00367385	1.7714	0.0057596	3.00849	88.5043		n.a.	n.a.	n.a.	n.a.	n.a.	n.a.	n.a.		26-02-2016	40	15
2996.22	ML-05	Ol-3 B	179.74	40.1214	0.1124	11.4561	0.4085	0.1146	48.3764	0.21	100.799		0.98543	0.00218269	0.235311	0.00807023	0.00238408	1.7713	0.0055262	3.0102	88.2732		n.a.	n.a.	n.a.	n.a.	n.a.	n.a.	n.a.		26-02-2016	40	15
2996.22	ML-05	Ol-3 B	184.73	39.9289	0.1248	11.1903	0.4207	0.2082	48.0914	0.199	100.163		0.986307	0.00243733	0.231165	0.00835875	0.00435603	1.77093	0.00526666	3.00882	88.4538		n.a.	n.a.	n.a.	n.a.	n.a.	n.a.	n.a.		26-02-2016	40	15
2996.22	ML-05	Ol-3 B	189.73	39.9414	0.0705	11.6063	0.4089	0.1358	48.1133	0.2266	100.503		0.985183	0.00137486	0.239411	0.0081125	0.00283713	1.76916	0.00598841	3.01207	88.0806		n.a.	n.a.	n.a.	n.a.	n.a.	n.a.	n.a.		26-02-2016	40	15
2996.22	ML-05	Ol-3 B	194.72	40.0161	0.1383	11.4675	0.4262	0.1964	48.3738	0.2104	100.829		0.983204	0.00268662	0.235632	0.00842299	0.00408729	1.77185	0.00553875	3.01142	88.2623		n.a.	n.a.	n.a.	n.a.	n.a.	n.a.	n.a.		26-02-2016	40	15
2996.22	ML-05	Ol-2 B	0	39.3748	0.0661	14.7288	0.3153	0.2131	45.3574	0.2763	100.332		0.987015	0.00131003	0.308766	0.00635731	0.00452454	1.69497	0.00742069	3.01036	84.5905		n.a.	n.a.	n.a.	n.a.	n.a.	n.a.	n.a.		26-02-2016	40	15
2996.22	ML-05	Ol-2 B	4	39.6359	0.04	13.6471	0.3428	0.1758	46.2014	0.2824	100.325		0.988537	0.00078875	0.284643	0.00687684	0.00371372	1.71778	0.00754617	3.00989	85.7851		n.a.	n.a.	n.a.	n.a.	n.a.	n.a.	n.a.		26-02-2016	40	15
2996.22	ML-05	Ol-2 B	8	39.7105	0.0758	13.7176	0.3156	0.2176	45.9628	0.259	100.259		0.990855	0.00149537	0.286246	0.00633411	0.00459885	1.7097	0.00692408	3.00615	85.6586		n.a.	n.a.	n.a.	n.a.	n.a.	n.a.	n.a.		26-02-2016	40	15
2996.22	ML-05	Ol-2 B	12	39.5584	0.0804	13.7651	0.3754	0.1781	46.2209	0.2597	100.438		0.986158	0.00158467	0.286975	0.00752742	0.0037606	1.71773	0.00693646	3.01067	85.6849		n.a.	n.a.	n.a.	n.a.	n.a.	n.a.	n.a.		26-02-2016	40	15
2996.22	ML-05	Ol-2 B	16	39.6889	0.059	14.0426	0.3272	0.2065	46.0452	0.264	100.633		0.988363	0.00116165	0.292449	0.00655397	0.00435565	1.70939	0.00704383	3.00931	85.3909		n.a.	n.a.	n.a.	n.a.	n.a.	n.a.	n.a.		26-02-2016	40	15
2996.22	ML-05	Ol-2 B	20.01	39.5721	0.0906	14.0834	0.344	0.2509	45.8078	0.2685	100.417		0.988053	0.00178852	0.294073	0.00690866	0.00530613	1.70506	0.00718279	3.00837	85.29		n.a.	n.a.	n.a.	n.a.	n.a.	n.a.	n.a.		26-02-2016	40	15
2996.22	ML-05	Ol-2 B	24.01	39.3126	0.0276	14.1145	0.3405	0.2473	45.6578	0.2582	99.9585		0.987014	0.000547868	0.296355	0.00687626	0.00525898	1.70889	0.00694553	3.01189	85.221		n.a.	n.a.	n.a.	n.a.	n.a.	n.a.	n.a.		26-02-2016	40	15
2996.22	ML-05	Ol-2 B	28.01	39.513	0.0578	14.5185	0.3392	0.2609	45.8231	0.2572	100.77		0.985451	0.00113972	0.302812	0.00680447	0.00551131	1.70368	0.00687264	3.01227	84.9084		n.a.	n.a.	n.a.	n.a.	n.a.	n.a.	n.a.		26-02-2016	40	15
2996.22	ML-05	Ol-2 B	32.01	39.419	0.0393	14.4883	0.402	0.2297	45.5953	0.2461	100.42		0.986702	0.000777765	0.303287	0.00809376	0.00486998	1.70141	0.00660009	3.01174	84.8712		n.a.	n.a.	n.a.	n.a.	n.a.	n.a.	n.a.		26-02-2016	40	15
2996.22	ML-05	Ol-2 B	36.01	39.428	0.0557	14.4873	0.3115	0.2368	45.4081	0.2485	100.176		0.988705	0.00110431	0.303812	0.00628295	0.00502955	1.69748	0.00667645	3.00909	84.8192		n.a.	n.a.	n.a.	n.a.	n.a.	n.a.	n.a.		26-02-2016	40	15
2996.22	ML-05	Ol-2 B	40.01	39.5484	0.0485	14.695	0.3795	0.2552	45.6242	0.2597	100.811		0.986764	0.000956756	0.306627	0.00761623	0.00539325	1.69702	0.00694247	3.01132	84.6966		n.a.	n.a.	n.a.	n.a.	n.a.	n.a.	n.a.		26-02-2016	40	15
2996.22	ML-05	Ol-2 B	44.01	39.4802	0.0551	14.6087	0.3805	0.249	45.4639	0.2472	100.485		0.987833	0.00109001	0.305683	0.00765778	0.00527703	1.69582	0.0066269	3.00999	84.7273		n.a.	n.a.	n.a.	n.a.	n.a.	n.a.	n.a.		26-02-2016	40	15
2996.22	ML-05	Ol-2 B	48.01	39.3709	0.0417	14.805	0.3192	0.1811	45.2147	0.2464	100.179		0.988595	0.000827855	0.31089	0.00644688	0.00385165	1.69251	0.0066289	3.00975	84.4819		n.a.	n.a.	n.a.	n.a.	n.a.	n.a.	n.a.		26-02-2016	40	15
2996.22	ML-05	Ol-2 B	52.01	39.6148	0.0315	15.1073	0.3638	0.2356	45.5859	0.2473	101.186		0.986343	0.000620092	0.314567	0.0072858	0.00496857	1.69204	0.00659709	3.01242	84.3234		n.a.	n.a.	n.a.	n.a.	n.a.	n.a.	n.a.		26-02-2016	40	15
2996.22	ML-05	Ol-2 B	56.01	39.5348	0.0491	14.7377	0.3308	0.1997	45.2811	0.2627	100.396		0.990034	0.000972137	0.308643	0.00666316	0.00423579	1.69043	0.00704836	3.00802	84.5607		n.a.	n.a.	n.a.	n.a.	n.a.	n.a.	n.a.		26-02-2016	40	15
2996.22	ML-05	Ol-2 B	60.02	39.1609	0.0359	15.2188	0.3281	0.1558	45.1076	0.2575	100.265		0.984866	0.000713829	0.320082	0.00663704	0.00331877	1.69115	0.0069384	3.01371	84.0853		n.a.	n.a.	n.a.	n.a.	n.a.	n.a.	n.a.		26-02-2016	40	15
2996.22	ML-05	Ol-2 B	64.02	39.1611	0.0314	15.5228	0.341	0.1949	45.0433	0.2227	100.517		0.983916	0.000623747	0.326159	0.0068913	0.00414764	1.6871	0.00599489	3.01484	83.7995		n.a.	n.a.	n.a.	n.a.	n.a.	n.a.	n.a.		26-02-2016	40	15
2996.22	ML-05	Ol-2 B	68.02	39.3256	0.0705	15.3448	0.3388	0.2253	45.117	0.2472	100.669		0.985369	0.00139665	0.321544	0.00682827	0.00478157	1.68528	0.00663636	3.01184	83.9775		n.a.	n.a.	n.a.	n.a.	n.a.	n.a.	n.a.		26-02-2016	40	15
2996.22	ML-05	Ol-2 B	72.03	39.5574	0.0739	15.2139	0.3942	0.2789	45.2154	0.2613	100.995		0.98738	0.0014584	0.31758	0.00791438	0.00589645	1.68249	0.00698801	3.0097	84.1215		n.a.	n.a.	n.a.	n.a.	n.a.	n.a.	n.a.		26-02-2016	40	15
2996.22	ML-05	Ol-2 B	76.03	39.2671	0.063	15.4845	0.3388	0.2468	44.8075	0.248	100.456		0.986748	0.00125168	0.32541	0.00684802	0.00525301	1.67856	0.00667709	3.01075	83.7617		n.a.	n.a.	n.a.	n.a.	n.a.	n.a.	n.a.		26-02-2016	40	15
2996.22	ML-05	Ol-2 B	80.03	39.4445	0.0219	15.4422	0.3394	0.2459	44.9234	0.2514	100.669		0.988734	0.000434023	0.323711	0.00684303	0.0052208	1.6787	0.00675174	3.0104	83.8339		n.a.	n.a.	n.a.	n.a.	n.a.	n.a.	n.a.		26-02-2016	40	15
2996.22	ML-05	Ol-2 B	84.03	39.3921	0.0311	15.3337	0.3041	0.2673	44.8347	0.2463	100.409		0.989415	0.000617597	0.322086	0.00614369	0.00568662	1.67877	0.00662813	3.00935	83.9026		n.a.	n.a.	n.a.	n.a.	n.a.	n.a.	n.a.		26-02-2016	40	15
2996.22	ML-05	Ol-2 B	88.03	39.2483	0.0518	15.2941	0.3219	0.2383	44.7555	0.2687	100.179		0.988135	0.0010311	0.322015	0.00651869	0.00508166	1.67977	0.00724805	3.0098	83.9136		n.a.	n.a.	n.a.	n.a.	n.a.	n.a.	n.a.		26-02-2016	40	15
2996.22	ML-05	Ol-2 B	92.03	39.3565	0.0503	15.7473	0.321	0.275	45.1949	0.2489	101.194		0.983088	0.000993389	0.328956	0.00644948	0.00581827	1.68296	0.00666129	3.01493	83.6496		n.a.	n.a.	n.a.	n.a.	n.a.	n.a.	n.a.		26-02-2016	40	15
2996.22	ML-05	Ol-2 B	96.03	39.504	0.0281	15.7801	0.3594	0.212	45.1227	0.2516	101.258		0.985894	0.000554461	0.329348	0.00721458	0.00448137	1.67878	0.00672756	3.013	83.5992		n.a.	n.a.	n.a.	n.a.	n.a.	n.a.	n.a.		26-02-2016	40	15
2996.22	ML-05	Ol-2 B	100.03	39.5112	0.0924	15.7137	0.313	0.2191	44.8488	0.2487	100.947		0.988117	0.00182699	0.328642	0.00629617	0.00464105	1.67204	0.00666379	3.00823	83.5735		n.a.	n.a.	n.a.	n.a.	n.a.	n.a.	n.a.		26-02-2016	40	15
2996.22	ML-05	Ol-2 B	104.03	39.2376	0.0681	15.2483	0.3482	0.2005	44.6968	0.2561	100.056		0.988693	0.00135669	0.321319	0.00705719	0.00427917	1.67897	0.00691395	3.00859	83.9364		n.a.	n.a.	n.a.	n.a.	n.a.	n.a.	n.a.		26-02-2016	40	15
2996.22	ML-05	Ol-2 B	108.03	39.225	0.051	15.2695	0.3342	0.2094	44.5478	0.2586	99.8955		0.990067	0.00101776	0.322316	0.00678503	0.00447676	1.67624	0.00699339	3.0079	83.8725		n.a.	n.a.	n.a.	n.a.	n.a.	n.a.	n.a.		26-02-2016	40	15
2996.22	ML-05	Ol-2 B	112.03	39.5346	0.0486	15.8195	0.3267	0.201	44.967	0.2366	101.134		0.987527	0.000959806	0.330461	0.00656394	0.00425259	1.67446	0.00633204	3.01055	83.5175		n.a.	n.a.	n.a.	n.a.	n.a.	n.a.	n.a.		26-02-2016	40	15
2996.22	ML-05	Ol-2 B	116.03	39.4368	0.0362	15.7312	0.3861	0.216	44.9076	0.2604	100.974		0.986942	0.000716265	0.329236	0.00777201	0.00457856	1.6754	0.00698214	3.01163	83.5762		n.a.	n.a.	n.a.	n.a.	n.a.	n.a.	n.a.		26-02-2016	40	15
2996.22	ML-05	Ol-2 B	120.04	39.3448	0.0204	15.7117	0.3221	0.1953	44.6495	0.2321	100.476		0.989107	0.000405472	0.33032	0.00651314	0.00415857	1.67333	0.00625156	3.01008	83.5141		n.a.	n.a.	n.a.	n.a.	n.a.	n.a.	n.a.		26-02-2016	40	15
2996.22	ML-05	Ol-2 B	124.04	39.3765	0.0256	15.3879	0.3684	0.2201	44.6846	0.2453	100.308		0.990341	0.000509053	0.323656	0.00745266	0.00468871	1.67538	0.00661002	3.00864	83.8094		n.a.	n.a.	n.a.	n.a.	n.a.	n.a.	n.a.		26-02-2016	40	15
2996.22	ML-05	Ol-2 B	128.04	39.3648	0.0488	15.6125	0.3174	0.2229	44.8917	0.2576	100.716		0.986927	0.000967325	0.327345	0.00640071	0.0047334	1.67784	0.00691959	3.01114	83.6751		n.a.	n.a.	n.a.	n.a.	n.a.	n.a.	n.a.		26-02-2016	40	15
2996.22	ML-05	Ol-2 B	132.05	39.2379	0.0278	15.8233	0.3653	0.2038	44.7704	0.2443	100.673		0.985599	0.000552096	0.33239	0.00738054	0.00433595	1.67646	0.0065747	3.0133	83.4538		n.a.	n.a.	n.a.	n.a.	n.a.	n.a.	n.a.		26-02-2016	40	15
2996.22	ML-05	Ol-2	0	39.9946	0.0814	12.9788	0.3399	0.1923	46.7228	0.2454	100.555		0.991265	0.0015951	0.269016	0.00677616	0.00403695	1.72634	0.00651659	3.00554	86.5179		0.26	24.24	0.64	5.57	11.61	0.25	2.3		25-03-2013	30	15
2996.22	ML-05	Ol-2	7.00446	39.9539	0.0662	12.7883	0.3356	0.1569	46.6926	0.2374	100.231		0.992493	0.00130017	0.265668	0.00670555	0.00330124	1.72912	0.00631839	3.00491	86.6819		0.26	29.94	0.64	5.65	13.61	0.24	2.35		25-03-2013	30	15
2996.22	ML-05	Ol-2	14.0045	39.9336	0.0596	12.6581	0.3544	0.2147	46.884	0.227	100.331		0.990923	0.00116929	0.262679	0.00707359	0.00451253	1.73435	0.00603511	3.00674	86.8465		0.26	33.37	0.65	5.31	10.02	0.24	2.43		25-03-2013	30	15
2996.22	ML-05	Ol-2	21.0045	40.249	0.0759	12.618	0.393	0.1751	47.1056	0.2221	100.839		0.992847	0.00148028	0.260299	0.00779764	0.00365846	1.73224	0.00586993	3.00419	86.9363		0.26	26.16	0.65	4.88	12.25	0.24	2.48		25-03-2013	30	15
2996.22	ML-05	Ol-2	28.0045	40.1066	0.0878	12.3273	0.327	0.1662	47.1359	0.2163	100.367		0.992525	0.00171789	0.255124	0.00650905	0.00348372	1.73895	0.00573509	3.00404	87.2059		0.26	22.57	0.66	5.81	12.9	0.24	2.52		25-03-2013	30	15
2996.22	ML-05	Ol-2	35.0045	40.1574	0.0802	12.4676	0.3581	0.1555	47.4079	0.2205	100.847		0.989944	0.00156313	0.257031	0.00710056	0.00324684	1.74222	0.00582386	3.00693	87.1437		0.26	24.9	0.65	5.44	13.55	0.24	2.49		25-03-2013	30	15
2996.22	ML-05	Ol-2	42.0045	40.0964	0.0859	12.2271	0.3692	0.171	47.4079	0.2056	100.563		0.990292	0.00167736	0.252544	0.00733438	0.00357717	1.74549	0.0054405	3.00635	87.3603		0.26	23.69	0.66	5.29	12.54	0.24	2.64		25-03-2013	30	15
2996.22	ML-05	Ol-2	49.0045	40.2287	0.0777	12.167	0.3557	0.1693	47.5288	0.2032	100.73		0.991354	0.00151387	0.250745	0.00705052	0.00353375	1.74606	0.00536506	3.00562	87.4427		0.26	26.28	0.66	5.39	12.45	0.24	2.68		25-03-2013	30	15
2996.22	ML-05	Ol-2	56.0045	40.3406	0.0486	11.9665	0.3847	0.1597	47.3474	0.2011	100.449		0.99577	0.00094848	0.247025	0.00763805	0.00333893	1.74229	0.00531846	3.00233	87.5824		0.25	41.33	0.67	5.05	13.07	0.24	2.69		25-03-2013	30	15
2996.22	ML-05	Ol-2	63.0045	40.2389	0.0936	12.0768	0.3934	0.1485	47.6899	0.2065	100.848		0.990146	0.00182098	0.24852	0.00778631	0.00309504	1.7494	0.00544417	3.00621	87.5611		0.26	21.43	0.66	4.95	13.9	0.24	2.61		25-03-2013	30	15
2996.22	ML-05	Ol-2	70.0045	40.1269	0.0431	11.726	0.405	0.1523	47.5187	0.2073	100.179		0.992759	0.000843065	0.242613	0.00805948	0.00319149	1.75259	0.00549497	3.00555	87.8402		0.26	48.09	0.67	4.8	13.41	0.24	2.59		25-03-2013	30	15
2996.22	ML-05	Ol-2	77.0045	40.3304	0.1066	11.8062	0.3997	0.1445	47.7907	0.2011	100.779		0.991584	0.00207219	0.242751	0.0079045	0.00300919	1.75165	0.00529744	3.00427	87.8284		0.25	20.12	0.67	4.87	14.69	0.24	2.7		25-03-2013	30	15
2996.22	ML-05	Ol-2	84.0045	40.3712	0.1117	11.6859	0.4167	0.1217	47.7806	0.2036	100.691		0.992737	0.00217166	0.240316	0.00824196	0.00253478	1.75155	0.00536412	3.00292	87.9352		0.25	18.37	0.67	4.67	16.92	0.24	2.63		25-03-2013	30	15
2996.22	ML-05	Ol-2	91.0045	40.2389	0.1023	11.6057	0.385	0.1315	47.9519	0.2041	100.619		0.990186	0.00199032	0.238836	0.00762037	0.00274083	1.75908	0.00538111	3.00583	88.0457		0.25	20.29	0.68	5.06	15.63	0.24	2.64		25-03-2013	30	15
2996.22	ML-05	Ol-2	98.0045	40.2796	0.0871	11.5957	0.3978	0.1527	48.0022	0.2012	100.716		0.990352	0.00169316	0.238428	0.00786708	0.00318002	1.75944	0.00530018	3.00626	88.0659		0.25	23.59	0.68	4.94	13.58	0.24	2.69		25-03-2013	30	15
2996.22	ML-05	Ol-2	105.004	40.3203	0.0873	11.5556	0.4244	0.1691	48.0828	0.2089	100.848		0.990062	0.00169484	0.237295	0.00838221	0.00351697	1.7601	0.00549585	3.00655	88.1198		0.25	23.58	0.68	4.59	12.29	0.24	2.58		25-03-2013	30	15
2996.22	ML-05	Ol-2	112.004	40.1778	0.0773	11.4554	0.4153	0.1879	48.0526	0.2065	100.573		0.989184	0.00150469	0.235862	0.00822426	0.00391835	1.76367	0.00544714	3.00781	88.2041		0.26	27.55	0.68	4.7	10.89	0.24	2.61		25-03-2013	30	15
2996.22	ML-05	Ol-2	119.004	40.2083	0.0889	11.3752	0.4013	0.1484	48.2138	0.2074	100.643		0.988609	0.00172817	0.233897	0.00793636	0.0030905	1.76721	0.00546355	3.00793	88.3116		0.26	22.65	0.68	4.87	14.35	0.24	2.6		25-03-2013	30	15
2996.22	ML-05	Ol-2	126.004	40.2897	0.0875	11.3351	0.3899	0.1638	48.1836	0.2026	100.652		0.990126	0.00170012	0.232958	0.00770714	0.00340954	1.76524	0.00533449	3.00647	88.3416		0.25	23.49	0.68	5	13.03	0.24	2.66		25-03-2013	30	15
2996.22	ML-05	Ol-2	133.004	40.076	0.0729	11.2449	0.4008	0.1552	48.1433	0.2061	100.299		0.988471	0.00142162	0.231949	0.00795153	0.00324233	1.7702	0.00544647	3.00869	88.415		0.26	28.34	0.69	4.88	13.43	0.24	2.63		25-03-2013	30	15
2996.22	ML-05	Ol-2	140.004	40.076	0.123	11.3151	0.4335	0.1413	48.1533	0.2097	100.452		0.987187	0.0023955	0.233093	0.0085891	0.0029481	1.76827	0.0055344	3.00802	88.3533		0.26	16.63	0.69	4.53	14.49	0.24	2.58		25-03-2013	30	15
2996.22	ML-05	Ol-2	147.004	40.2592	0.095	11.3452	0.409	0.1766	48.3548	0.2106	100.85		0.987827	0.00184295	0.2328	0.00807203	0.00367022	1.76874	0.00553645	3.00849	88.369		0.26	21.05	0.69	4.8	12.03	0.24	2.58		25-03-2013	30	15
2996.22	ML-05	Ol-2	154.004	40.1167	0.1058	11.1447	0.4119	0.1663	47.9619	0.2037	100.111		0.990568	0.00206547	0.230135	0.00818077	0.00347806	1.76548	0.00538899	3.0053	88.468		0.26	18.95	0.69	4.75	12.32	0.24	2.65		25-03-2013	30	15
2996.22	ML-05	Ol-2	161.004	40.4933	0.0825	11.2249	0.4292	0.1635	48.1533	0.2093	100.756		0.993318	0.00160005	0.230273	0.00846855	0.00339711	1.76092	0.00550088	3.00348	88.4354		0.25	24.34	0.69	4.61	12.97	0.24	2.59		25-03-2013	30	15
2996.22	ML-05	Ol-2	168.004	40.2592	0.0946	11.2048	0.3874	0.1388	48.0526	0.2048	100.342		0.991625	0.00184225	0.230804	0.00767513	0.00289573	1.76444	0.00540468	3.00469	88.4323		0.26	20.98	0.69	5.04	14.91	0.24	2.63		25-03-2013	30	15
2996.22	ML-05	Ol-2	175.004	40.2185	0.0931	11.1247	0.4035	0.1361	48.1936	0.2023	100.372		0.990219	0.0018123	0.22906	0.00799084	0.00283824	1.7689	0.00533653	3.00616	88.5353		0.26	21.22	0.69	4.82	15.16	0.24	2.65		25-03-2013	30	15
2996.22	ML-05	Ol-2	182.004	40.4933	0.0826	11.2048	0.4145	0.1326	48.2944	0.2065	100.829		0.992389	0.0016005	0.229647	0.00817085	0.00275251	1.76443	0.00542221	3.00441	88.4835		0.25	24.69	0.69	4.78	15.55	0.24	2.61		25-03-2013	30	15
2996.22	ML-05	Ol-2	189.004	40.1574	0.1448	11.2449	0.3909	0.1742	48.7578	0.2177	101.088		0.982783	0.00280179	0.230146	0.00769487	0.00361098	1.77887	0.00570831	3.01161	88.5443		0.25	14.05	0.69	4.98	12.16	0.24	2.49		25-03-2013	30	15
2996.22	ML-05	Ol-2	196.004	40.361	0.0808	11.1948	0.4062	0.1765	48.385	0.2152	100.82		0.989767	0.0015666	0.229585	0.00801226	0.00366608	1.76885	0.0056542	3.0071	88.5117		0.25	25.7	0.69	4.77	12.02	0.24	2.55		25-03-2013	30	15
2996.22	ML-05	Ol-2	203.004	40.3712	0.0968	11.2249	0.411	0.1454	48.3951	0.2079	100.852		0.989603	0.00187603	0.230106	0.00810355	0.00301884	1.76848	0.00546012	3.00665	88.4866		0.25	21.34	0.69	4.78	13.89	0.24	2.63		25-03-2013	30	15
2996.22	ML-05	Ol-2	210.004	40.249	0.0753	11.0946	0.4095	0.1635	48.1836	0.2065	100.382		0.990902	0.0014657	0.228425	0.00810911	0.00340941	1.76841	0.00544694	3.00617	88.5607		0.25	26.77	0.69	4.8	12.67	0.24	2.62		25-03-2013	30	15
2996.22	ML-05	Ol-2	217.004	40.2287	0.091	11.0545	0.3941	0.1588	48.3246	0.205	100.457		0.989455	0.00176961	0.227382	0.0077967	0.00330824	1.77189	0.00540222	3.00701	88.6268		0.25	21.89	0.69	4.96	12.85	0.24	2.63		25-03-2013	30	15
2996.22	ML-05	Ol-2	224.004	40.2389	0.0844	11.1647	0.4219	0.1426	48.2843	0.2133	100.55		0.989375	0.00164071	0.229573	0.00834389	0.00296975	1.76982	0.00561906	3.00734	88.5179		0.25	24.68	0.69	4.64	14.82	0.24	2.55		25-03-2013	30	15
2996.22	ML-05	Ol-2	231.004	40.2999	0.0904	11.1146	0.4186	0.1623	48.375	0.2054	100.666		0.989446	0.00175482	0.228212	0.00826668	0.00337514	1.77059	0.00540314	3.00704	88.5825		0.25	22.55	0.69	4.68	12.68	0.24	2.64		25-03-2013	30	15
2996.22	ML-05	Ol-2	238.004	40.3508	0.0851	11.1948	0.4175	0.1587	48.3447	0.2179	100.77		0.989962	0.00165071	0.229689	0.00823885	0.00329784	1.76817	0.00572771	3.00674	88.5033		0.25	24.4	0.69	4.68	13.28	0.24	2.51		25-03-2013	30	15
2996.22	ML-05	Ol-2	245.004	40.1778	0.095	11.1647	0.417	0.1658	48.3145	0.217	100.552		0.98807	0.00184714	0.229618	0.00824862	0.0034536	1.77128	0.00571767	3.00824	88.5243		0.26	21.68	0.69	4.65	12.4	0.24	2.51		25-03-2013	30	15
2996.22	ML-05	Ol-2	252.004	40.3712	0.0854	11.0946	0.4392	0.1513	48.4354	0.2122	100.789		0.989867	0.00165554	0.227496	0.00866188	0.00314218	1.77042	0.00557454	3.00682	88.6134		0.25	23.94	0.69	4.49	13.65	0.24	2.55		25-03-2013	30	15
2996.22	ML-05	Ol-2	259.004	40.3101	0.1054	11.1247	0.4002	0.1488	48.4052	0.2132	100.708		0.98914	0.00204484	0.22829	0.00789887	0.00309266	1.7707	0.00560517	3.00677	88.5797		0.25	19.29	0.69	4.89	14.09	0.24	2.56		25-03-2013	30	15
2996.22	ML-05	Ol-2	266.004	40.2897	0.1092	11.1647	0.4247	0.15	48.2238	0.2111	100.573		0.99016	0.00212182	0.229465	0.00839531	0.00312239	1.76677	0.00555849	3.0056	88.5052		0.25	18.89	0.69	4.62	13.82	0.24	2.59		25-03-2013	30	15
2996.22	ML-05	Ol-2	273.004	40.2694	0.0931	11.1046	0.3858	0.1321	48.2238	0.2116	100.42		0.990725	0.00181094	0.228475	0.00763456	0.00275275	1.76868	0.00557765	3.00565	88.56		0.25	21.68	0.69	5.01	15.18	0.24	2.56		25-03-2013	30	15
2996.22	ML-05	Ol-3	0	39.1398	0.0555	13.4598	0.3196	0.1722	46.4307	0.2443	99.8219		0.981258	0.0011001	0.282203	0.00644489	0.00365665	1.73532	0.00656215	3.01654	86.0124		0.26	35.01	0.62	5.83	12.14	0.25	2.29		25-03-2013	30	15
2996.22	ML-05	Ol-3	7.9949	39.5265	0.0404	13.8006	0.3278	0.2049	46.2897	0.2488	100.439		0.985693	0.000796545	0.287811	0.00657516	0.00432794	1.72086	0.00664755	3.01271	85.6716		0.26	47.11	0.62	5.8	10.48	0.25	2.26		25-03-2013	30	15
2996.22	ML-05	Ol-3	15.9949	39.4145	0.0744	13.9409	0.3485	0.2137	45.9472	0.2544	100.194		0.986015	0.00147155	0.291658	0.00701251	0.00452811	1.71354	0.0068187	3.01104	85.4549		0.26	24.96	0.61	5.5	10.37	0.25	2.22		25-03-2013	30	15
2996.22	ML-05	Ol-3	23.9949	39.4858	0.0515	14.3217	0.3496	0.201	45.6651	0.2576	100.332		0.987922	0.00101874	0.299664	0.00703554	0.00425955	1.70324	0.00690535	3.01004	85.0385		0.26	36.95	0.6	5.43	10.93	0.25	2.2		25-03-2013	30	15
2996.22	ML-05	Ol-3	31.9949	39.4654	0.0345	14.442	0.3155	0.2061	45.655	0.249	100.368		0.987584	0.000682578	0.302233	0.00635039	0.00436839	1.70316	0.00667597	3.01105	84.929		0.26	55.29	0.6	6.03	10.73	0.25	2.28		25-03-2013	30	15
2996.22	ML-05	Ol-3	39.9949	39.4756	0.0534	14.6725	0.3019	0.1846	45.3629	0.2583	100.309		0.989057	0.00105781	0.307435	0.00608414	0.00391751	1.69434	0.00693385	3.00883	84.6419		0.26	36.35	0.6	6.26	11.65	0.25	2.2		25-03-2013	30	15
2996.22	ML-05	Ol-3	47.9949	39.1092	0.0177	14.903	0.35	0.1864	44.9498	0.2491	99.7653		0.987361	0.000353301	0.31465	0.00710736	0.00398592	1.69174	0.00673795	3.01193	84.3176		0.26	105.08	0.59	5.41	11.7	0.25	2.26		25-03-2013	30	15
2996.22	ML-05	Ol-3	55.9949	39.1601	0.0327	15.0634	0.3128	0.1863	44.8491	0.2503	99.8547		0.988068	0.000652328	0.31785	0.00634824	0.00398145	1.68696	0.00676646	3.01063	84.1456		0.26	57.62	0.59	6.05	11.72	0.25	2.25		25-03-2013	30	15
2996.22	ML-05	Ol-3	63.9949	39.1092	0.0296	15.354	0.3415	0.1988	44.7383	0.2475	100.019		0.986788	0.000590489	0.323984	0.00693073	0.00424861	1.6828	0.00669079	3.01203	83.8556		0.26	61.6	0.58	5.56	10.99	0.25	2.3		25-03-2013	30	15
2996.22	ML-05	Ol-3	71.9949	39.0177	0.0382	15.4843	0.3434	0.186	44.4864	0.2482	99.8042		0.987203	0.00076416	0.327638	0.00698859	0.00398606	1.67796	0.00672829	3.01127	83.6638		0.26	48.78	0.58	5.48	11.74	0.25	2.26		25-03-2013	30	15
2996.22	ML-05	Ol-3	79.9949	39.2619	0.0467	15.7549	0.3298	0.1826	44.426	0.2584	100.26		0.989366	0.000930418	0.332015	0.00668467	0.00389737	1.6689	0.00697647	3.00877	83.4069		0.26	38.94	0.57	5.7	11.8	0.25	2.19		25-03-2013	30	15
2996.22	ML-05	Ol-3	87.9949	38.9871	0.0506	15.8552	0.3392	0.2185	44.4764	0.2498	100.177		0.984629	0.00101036	0.334871	0.00689051	0.004674	1.67452	0.0067593	3.01335	83.3347		0.26	37.8	0.57	5.64	10.22	0.25	2.26		25-03-2013	30	15
2996.22	ML-05	Ol-3	95.9949	39.0889	0.0325	16.0255	0.3359	0.2191	44.4764	0.242	100.42		0.985379	0.000647752	0.337846	0.00681089	0.00467819	1.67143	0.00653616	3.01333	83.1857		0.26	58.6	0.57	5.62	10.08	0.25	2.32		25-03-2013	30	15
2996.22	ML-05	Ol-3	103.995	38.9769	0.0249	16.0957	0.3404	0.2043	44.2547	0.2562	100.153		0.985708	0.00049787	0.340413	0.00692427	0.00437618	1.66843	0.00694189	3.0133	83.0543		0.26	76.76	0.57	5.65	10.72	0.25	2.2		25-03-2013	30	15
2996.22	ML-05	Ol-3	111.995	38.8345	0.0622	16.1859	0.3474	0.2353	44.8592	0.2493	100.774		0.977135	0.00123738	0.340588	0.0070309	0.0050147	1.68266	0.00672074	3.02039	83.1663		0.26	31.13	0.57	5.49	9.38	0.25	2.26		25-03-2013	30	15
2996.22	ML-05	Ol-3	119.995	38.8141	0.0533	16.1759	0.315	0.212	44.1238	0.2598	99.9539		0.984058	0.0010684	0.342969	0.0064237	0.00455253	1.66768	0.00705712	3.01381	82.9424		0.26	34.3	0.57	5.98	10.47	0.25	2.18		25-03-2013	30	15
2996.22	ML-05	Ol-3	127.995	39.0482	0.0595	16.256	0.3381	0.2124	44.1238	0.2506	100.289		0.986497	0.00118847	0.343452	0.00687043	0.00454501	1.66179	0.00678319	3.01113	82.8723		0.26	31.58	0.56	5.66	10.41	0.25	2.25		25-03-2013	30	15
2996.22	ML-05	Ol-3	135.995	38.8752	0.0331	16.3262	0.3358	0.1925	44.0129	0.2542	100.03		0.985425	0.000663368	0.346093	0.00684661	0.00413302	1.66318	0.00690374	3.01325	82.7753		0.26	57.64	0.56	5.68	11.43	0.25	2.22		25-03-2013	30	15
2996.22	ML-05	Ol-3	143.995	38.7022	0.0288	16.4465	0.3048	0.1873	43.9928	0.2514	99.9138		0.983021	0.000578356	0.349346	0.0062271	0.0040295	1.66578	0.00684148	3.01582	82.6638		0.26	66.11	0.56	6.19	11.91	0.25	2.24		25-03-2013	30	15
2996.22	ML-05	Ol-3	151.995	38.6208	0.0361	16.226	0.3259	0.2429	43.8417	0.2484	99.5417		0.984041	0.000727236	0.345748	0.00667915	0.00524211	1.66529	0.00678113	3.0145	82.8074		0.26	51.99	0.56	5.77	9.07	0.25	2.25		25-03-2013	30	15
2996.22	ML-05	Ol-3	159.995	38.4579	0.0465	16.226	0.3066	0.1983	44.8289	0.255	100.319		0.972923	0.000930082	0.343289	0.00623891	0.00424914	1.69067	0.00691179	3.02522	83.1222		0.26	39.97	0.56	6.07	10.63	0.25	2.2		25-03-2013	30	15
2996.22	ML-05	Ol-3	167.995	38.6615	0.0514	16.3763	0.3425	0.2422	43.7107	0.2428	99.6274		0.984734	0.00103509	0.348829	0.0070169	0.00522517	1.65973	0.00662593	3.0132	82.6329		0.26	37.3	0.56	5.49	9.25	0.25	2.29		25-03-2013	30	15
2996.22	ML-05	Ol-3	175.995	38.6411	0.0459	16.3462	0.3389	0.228	43.6402	0.2485	99.4889		0.985426	0.00092547	0.348617	0.00695168	0.00492487	1.65909	0.00678982	3.01272	82.6361		0.26	40.02	0.56	5.55	9.78	0.26	2.27		25-03-2013	30	15
2996.22	ML-05	Ol-3	183.995	38.7531	0.0438	16.3663	0.3323	0.221	43.7611	0.2517	99.7293		0.985716	0.000880837	0.348138	0.00679861	0.00476128	1.65937	0.00685941	3.01252	82.6582		0.26	42.51	0.56	5.65	10.08	0.26	2.22		25-03-2013	30	15
2996.22	ML-05	Ol-3	191.995	38.8243	0.0333	16.5367	0.3333	0.2137	43.8014	0.2546	99.9972		0.985536	0.000668326	0.351053	0.00680531	0.00459472	1.65755	0.00692445	3.01313	82.5225		0.26	57.05	0.56	5.65	10.33	0.26	2.22		25-03-2013	30	15
2996.22	ML-05	Ol-3	199.995	38.8955	0.049	16.6068	0.351	0.2344	43.8417	0.246	100.224		0.985337	0.000981424	0.351826	0.00715214	0.00502954	1.6557	0.00667695	3.0127	82.4746		0.26	39.35	0.56	5.42	9.54	0.26	2.28		25-03-2013	30	15
2996.22	ML-05	Ol-3	207.995	38.8548	0.0251	16.5567	0.3399	0.2042	43.8618	0.249	100.092		0.985437	0.000503307	0.351167	0.00693392	0.00438657	1.65836	0.00676614	3.01356	82.5249		0.26	73.92	0.56	5.65	10.72	0.26	2.25		25-03-2013	30	15
2996.22	ML-05	Ol-3	215.995	39.0075	0.0646	16.5868	0.3482	0.2108	43.9827	0.2463	100.447		0.985474	0.00129034	0.350441	0.00707571	0.0045108	1.65649	0.00666683	3.01195	82.5384		0.26	30.04	0.56	5.44	10.49	0.26	2.29		25-03-2013	30	15
2996.22	ML-05	Ol-3	223.995	39.2415	0.0561	16.6469	0.3169	0.2207	43.8618	0.246	100.59		0.989506	0.00111844	0.351045	0.00642745	0.00471369	1.6488	0.00664608	3.00826	82.4464		0.26	33.93	0.56	5.96	10.22	0.26	2.3		25-03-2013	30	15
2996.22	ML-05	Ol-3	231.995	39.2517	0.0408	16.7571	0.3582	0.2541	43.9223	0.2479	100.832		0.988331	0.00081223	0.352858	0.00725459	0.00541919	1.64868	0.00668772	3.01005	82.3707		0.26	46.15	0.56	5.28	8.79	0.26	2.28		25-03-2013	30	15
2996.22	ML-05	Ol-3	239.995	38.7938	0.0339	16.6469	0.3506	0.2057	44.3756	0.2469	100.653		0.979246	0.000676558	0.351414	0.00711845	0.00439795	1.66987	0.00667742	3.0194	82.6143		0.26	55.37	0.56	5.42	10.75	0.25	2.28		25-03-2013	30	15
2996.22	ML-05	Ol-3	247.995	39.1398	0.0445	16.8073	0.3433	0.2267	44.0432	0.245	100.85		0.985706	0.000886063	0.353983	0.00695419	0.00483578	1.65355	0.00661078	3.01252	82.3672		0.26	43.46	0.56	5.5	9.88	0.25	2.29		25-03-2013	30	15
2996.22	ML-05	Ol-3	255.995	39.0787	0.0324	16.687	0.302	0.2038	44.023	0.2455	100.572		0.986239	0.000646491	0.352189	0.00613046	0.00435644	1.65627	0.00663821	3.01247	82.4647		0.26	58.98	0.56	6.29	11.18	0.26	2.29		25-03-2013	30	15
2996.22	ML-05	Ol-3	263.995	39.3331	0.0378	16.6569	0.3504	0.2346	44.1036	0.2413	100.958		0.988437	0.000751031	0.350059	0.00708269	0.00499349	1.65224	0.00649689	3.01006	82.5171		0.26	49.33	0.56	5.42	9.77	0.25	2.33		25-03-2013	30	15
2996.22	ML-05	Ol-3	271.995	39.1906	0.0542	16.7872	0.3426	0.1834	44.0432	0.246	100.847		0.986541	0.00107872	0.353401	0.00693688	0.00391037	1.6528	0.00663476	3.0113	82.3846		0.26	34.38	0.56	5.47	12.06	0.26	2.3		25-03-2013	30	15
2996.22	ML-05	Ol-3	279.995	39.0889	0.0684	16.8173	0.3465	0.2258	44.0432	0.2444	100.834		0.984645	0.00136225	0.354273	0.00702059	0.00481766	1.65392	0.00659607	3.01263	82.3586		0.26	27.62	0.56	5.48	9.88	0.26	2.3		25-03-2013	30	15
2996.22	ML-05	Ol-4	0	39.4552	0.0602	13.6001	0.3199	0.1988	46.2494	0.2553	100.139		0.985931	0.00118936	0.284211	0.00642984	0.00420769	1.72288	0.00683519	3.01169	85.8397		0.26	33.74	0.62	5.8	10.91	0.25	2.23		25-03-2013	30	15
2996.22	ML-05	Ol-4	6.00009	39.5876	0.0483	13.55	0.3035	0.2046	46.3199	0.2582	100.272		0.987421	0.000952503	0.282644	0.00608901	0.0043225	1.72234	0.00690014	3.01067	85.9029		0.26	39.18	0.62	6.22	10.8	0.25	2.18		25-03-2013	30	15
2996.22	ML-05	Ol-4	12.0001	39.669	0.0399	13.981	0.3311	0.1843	46.1889	0.2536	100.648		0.987554	0.000785341	0.291075	0.00663	0.00388617	1.71418	0.00676421	3.01088	85.4844		0.26	48.11	0.61	5.55	11.76	0.25	2.24		25-03-2013	30	15
2996.22	ML-05	Ol-4	18.0001	39.5061	0.0429	14.442	0.3203	0.1788	45.7658	0.2523	100.508		0.987054	0.000847441	0.301759	0.00643691	0.00378381	1.70462	0.00675385	3.01125	84.96		0.26	46.43	0.6	5.87	12	0.25	2.26		25-03-2013	30	15
2996.22	ML-05	Ol-4	24.0001	39.2314	0.047	14.5322	0.3308	0.1761	45.4938	0.2599	100.071		0.985456	0.00093342	0.305275	0.00668364	0.0037467	1.70359	0.00699468	3.01268	84.8036		0.26	39.12	0.6	5.73	12.15	0.25	2.18		25-03-2013	30	15
2996.22	ML-05	Ol-4	30.0001	39.5774	0.0155	15.0834	0.3342	0.2098	45.3931	0.2519	100.865		0.988246	0.000306003	0.314974	0.00671226	0.0044372	1.68973	0.00673913	3.01114	84.2882		0.26	118.1	0.59	5.76	10.51	0.25	2.25		25-03-2013	30	15
2996.22	ML-05	Ol-4	36.0001	39.0584	0.0247	15.2338	0.3406	0.1771	45.1715	0.2587	100.265		0.982871	0.000491422	0.320587	0.006894	0.00377474	1.69455	0.00697488	3.01615	84.0911		0.26	77.42	0.59	5.6	12.15	0.25	2.21		25-03-2013	30	15
2996.22	ML-05	Ol-4	42.0001	39.3229	0.0369	15.4442	0.3466	0.2019	45.0606	0.2515	100.665		0.985888	0.000731448	0.32382	0.00698963	0.0042875	1.68418	0.00675581	3.01265	83.8735		0.26	51.16	0.58	5.49	10.88	0.25	2.24		25-03-2013	30	15
2996.22	ML-05	Ol-4	48.0001	39.3026	0.0356	15.6146	0.3236	0.204	44.8088	0.2551	100.544		0.98717	0.000706962	0.327988	0.00653767	0.00433997	1.67781	0.00686497	3.01142	83.648		0.26	53.24	0.58	5.92	10.77	0.25	2.22		25-03-2013	30	15
2996.22	ML-05	Ol-4	54.0001	39.1296	0.0318	15.8351	0.3141	0.2012	44.7685	0.2574	100.538		0.984297	0.000632446	0.333118	0.00635525	0.00428681	1.67881	0.00693725	3.01444	83.4429		0.26	57.52	0.57	6.09	11.06	0.25	2.21		25-03-2013	30	15
2996.22	ML-05	Ol-4	60.0001	39.2721	0.0554	15.8652	0.3364	0.2234	44.6678	0.25	100.67		0.986363	0.00110012	0.333238	0.00679599	0.0047525	1.67246	0.00672745	3.01144	83.3855		0.26	34.1	0.57	5.74	10.3	0.25	2.27		25-03-2013	30	15
2996.22	ML-05	Ol-4	66.0001	39.0075	0.0581	16.0857	0.3239	0.213	44.6073	0.2538	100.549		0.982452	0.00115695	0.338812	0.00656173	0.0045439	1.67486	0.00684877	3.01523	83.1744		0.26	32.12	0.57	5.89	10.32	0.25	2.25		25-03-2013	30	15
2996.22	ML-05	Ol-4	72.0001	39.2212	0.0556	16.1458	0.3468	0.2361	44.4058	0.2478	100.659		0.986574	0.00110576	0.339644	0.00701668	0.00503026	1.66517	0.00667833	3.01121	83.0585		0.26	34.95	0.57	5.51	9.39	0.25	2.3		25-03-2013	30	15
2996.22	ML-05	Ol-4	78.0001	39.2517	0.0539	16.3162	0.3466	0.2145	44.4562	0.2477	100.887		0.985754	0.00107022	0.342677	0.00700136	0.00456271	1.66437	0.0066649	3.01211	82.9264		0.26	34.36	0.56	5.53	10.38	0.25	2.29		25-03-2013	30	15
2996.22	ML-05	Ol-4	84.0001	39.2008	0.0186	16.3262	0.369	0.2079	44.557	0.2572	100.937		0.984503	0.000369326	0.342896	0.00745405	0.00442244	1.66819	0.00692071	3.01476	82.9497		0.26	100.1	0.56	5.15	10.47	0.25	2.22		25-03-2013	30	15
2996.22	ML-05	Ol-4	90.0001	39.038	0.0428	16.1057	0.3236	0.2084	44.3454	0.2502	100.314		0.985436	0.000854201	0.339998	0.00657042	0.00445578	1.66877	0.00676684	3.01286	83.0743		0.26	44.55	0.57	5.81	10.81	0.25	2.25		25-03-2013	30	15
2996.22	ML-05	Ol-4	96.0001	39.1398	0.0603	16.1759	0.3437	0.2122	44.2547	0.2615	100.448		0.986759	0.00120195	0.341049	0.00696973	0.00453131	1.66326	0.00706353	3.01084	82.9843		0.26	32.36	0.57	5.6	10.55	0.25	2.18		25-03-2013	30	15
2996.22	ML-05	Ol-4	102	39.0991	0.0545	16.1859	0.309	0.1962	44.2749	0.2529	100.372		0.9864	0.00108707	0.341491	0.00627031	0.00419249	1.66515	0.00683586	3.01143	82.9819		0.26	35.76	0.57	6.12	11.18	0.25	2.25		25-03-2013	30	15
2996.22	ML-05	Ol-4	108	39.3535	0.05	16.256	0.3299	0.2256	44.3555	0.2468	100.817		0.98838	0.000992856	0.341438	0.00666449	0.00479916	1.66072	0.00664115	3.00963	82.9465		0.26	37.26	0.57	5.73	9.85	0.25	2.28		25-03-2013	30	15
2996.22	ML-05	Ol-4	114	38.9566	0.0529	16.1358	0.2936	0.1941	44.4159	0.255	100.304		0.983627	0.00105604	0.340718	0.00596279	0.00415108	1.67185	0.00689838	3.01426	83.0705		0.26	36.13	0.57	6.45	11.04	0.25	2.24		25-03-2013	30	15
2996.22	ML-05	Ol-4	120	39.1194	0.0324	16.1859	0.3329	0.1928	44.4562	0.2553	100.575		0.98519	0.000645131	0.340894	0.0067435	0.00411263	1.66905	0.00688868	3.01352	83.0396		0.26	58.58	0.57	5.71	11.39	0.25	2.23		25-03-2013	30	15
2996.22	ML-05	Ol-4	126	39.1398	0.0264	16.1959	0.3342	0.1907	44.4562	0.2502	100.593		0.985524	0.000525567	0.341044	0.00676861	0.00406711	1.66875	0.00674985	3.01342	83.0309		0.26	71.66	0.57	5.72	11.3	0.25	2.26		25-03-2013	30	15
2996.22	ML-05	Ol-4	132	39.2517	0.0196	16.2861	0.3284	0.2183	44.4159	0.2556	100.776		0.986805	0.000389587	0.34241	0.00664079	0.00464849	1.66464	0.0068848	3.01242	82.9396		0.26	94.46	0.57	5.84	10.08	0.25	2.23		25-03-2013	30	15
2996.22	ML-05	Ol-4	138	39.0177	0.0541	16.1057	0.3171	0.2118	44.4461	0.2499	100.402		0.984092	0.00107882	0.339712	0.00643302	0.00452466	1.67116	0.00675303	3.01375	83.1062		0.26	34.55	0.57	6.09	10.61	0.25	2.27		25-03-2013	30	15
2996.22	ML-05	Ol-4	144	39.2721	0.054	16.1458	0.3339	0.2134	44.1741	0.2499	100.443		0.989564	0.00107579	0.340232	0.00676738	0.00455449	1.65934	0.00674658	3.00828	82.9848		0.26	35.37	0.57	5.71	10.5	0.25	2.28		25-03-2013	30	15
2996.22	ML-05	Ol-4	150	39.0584	0.0712	16.1358	0.3499	0.2358	44.3655	0.2521	100.469		0.984647	0.00141913	0.340183	0.00709503	0.00503496	1.66733	0.00680921	3.01251	83.0545		0.26	27.13	0.57	5.46	9.49	0.25	2.25		25-03-2013	30	15
2996.22	ML-05	Ol-4	156	39.1601	0.0235	16.0055	0.3538	0.1966	44.3756	0.2503	100.365		0.987433	0.000468497	0.337512	0.00717572	0.00419888	1.66808	0.00676211	3.01163	83.1715		0.26	80.37	0.57	5.34	11.39	0.25	2.26		25-03-2013	30	15
2996.22	ML-05	Ol-4	162	39.0889	0.0518	16.0756	0.3268	0.2044	44.5166	0.262	100.526		0.984452	0.00103145	0.338583	0.00662014	0.00436021	1.67137	0.00706969	3.01349	83.1547		0.26	36.52	0.57	5.85	10.92	0.25	2.17		25-03-2013	30	15
2996.22	ML-05	Ol-4	168	39.1703	0.0077	16.1358	0.3395	0.2236	44.4663	0.2472	100.59		0.986229	0.00015328	0.339756	0.0068755	0.00476846	1.66901	0.00666848	3.01346	83.0864		0.26	253.27	0.57	5.62	9.87	0.25	2.29		25-03-2013	30	15
2996.22	ML-05	Ol-15	0	38.8446	0.0423	17.7393	0.2041	0.2211	43.2373	0.2942	100.583		0.98498	0.000848032	0.376175	0.00416278	0.00474866	1.63442	0.00799276	3.01332	81.2904		0.26	45.58	0.54	8.75	10.24	0.26	2		25-03-2013	30	15
2996.22	ML-05	Ol-15	4.02647	39.1092	0.0531	14.9732	0.2966	0.1975	46.1386	0.2667	101.035		0.97566	0.00104734	0.312385	0.00595161	0.00417323	1.7159	0.00712853	3.02224	84.5986		0.26	36.23	0.59	6.29	11.01	0.25	2.13		25-03-2013	30	15
2996.22	ML-05	Ol-15	8.05247	39.3942	0.0812	13.5901	0.2947	0.1852	46.4206	0.2565	100.223		0.98352	0.00160281	0.283747	0.005918	0.00391632	1.72771	0.00686114	3.01327	85.8935		0.26	23.82	0.62	6.26	11.64	0.25	2.21		25-03-2013	30	15
2996.22	ML-05	Ol-15	12.0785	39.1906	0.0811	13.2694	0.2977	0.1923	46.6624	0.2542	99.9478		0.98033	0.00160393	0.277586	0.0059898	0.00407432	1.74007	0.00681276	3.01646	86.2421		0.26	24.2	0.63	6.31	11.28	0.24	2.21		25-03-2013	30	15
2996.22	ML-05	Ol-15	16.1045	39.7504	0.0614	13.099	0.325	0.1539	46.5919	0.2498	100.231		0.989321	0.0012082	0.272641	0.00650614	0.0032443	1.72868	0.0066611	3.00826	86.3769		0.26	31.04	0.63	5.79	13.85	0.24	2.26		25-03-2013	30	15
2996.22	ML-05	Ol-15	20.1305	39.5977	0.0272	13.1191	0.3311	0.2111	47.5388	0.2395	101.065		0.978917	0.000531643	0.271229	0.00658383	0.00442028	1.75199	0.00634365	3.02002	86.5942		0.26	71.12	0.63	5.73	10.09	0.24	2.33		25-03-2013	30	15
2996.22	ML-05	Ol-15	24.1565	39.6283	0.0504	13.0389	0.341	0.1908	46.8337	0.2471	100.33		0.985784	0.00099125	0.271253	0.006823	0.00402014	1.73678	0.00658578	3.01223	86.4916		0.26	39.13	0.63	5.52	11.06	0.24	2.28		25-03-2013	30	15
2996.22	ML-05	Ol-15	28.1825	39.4756	0.0566	13.1291	0.323	0.2123	46.8437	0.2418	100.282		0.983223	0.00111459	0.273473	0.00647097	0.00447877	1.73934	0.00645264	3.01455	86.4134		0.26	34.19	0.63	5.79	10.11	0.24	2.3		25-03-2013	30	15
2996.22	ML-05	Ol-15	32.2085	39.5265	0.0547	13.1091	0.324	0.1649	46.8135	0.2436	100.236		0.984502	0.00107719	0.273059	0.00649109	0.00347884	1.73823	0.00650075	3.01334	86.4237		0.26	35.87	0.63	5.73	12.99	0.24	2.29		25-03-2013	30	15
2996.22	ML-05	Ol-15	36.2345	39.73	0.0609	12.9988	0.3318	0.188	46.7128	0.2395	100.262		0.988336	0.00119778	0.270424	0.00663905	0.00396122	1.73233	0.00638335	3.00927	86.4974		0.26	32.24	0.64	5.66	11.52	0.24	2.33		25-03-2013	30	15
2996.22	ML-05	Ol-15	40.2605	39.8114	0.0494	13.1391	0.324	0.1949	47.0049	0.2381	100.762		0.986151	0.000967471	0.272181	0.00645542	0.00408915	1.73575	0.00631906	3.01191	86.4447		0.26	38.81	0.63	5.89	10.86	0.24	2.33		25-03-2013	30	15
2996.22	ML-05	Ol-15	44.2865	39.384	0.0852	12.9587	0.341	0.2052	47.0553	0.2321	100.262		0.980602	0.00167721	0.269831	0.00682922	0.00432749	1.74659	0.00619164	3.01604	86.6183		0.26	22.9	0.64	5.54	10.54	0.24	2.39		25-03-2013	30	15
2996.22	ML-05	Ol-15	48.3125	39.6384	0.0808	13.0589	0.3453	0.1692	46.9445	0.2348	100.472		0.984529	0.00158671	0.271254	0.00689847	0.00355958	1.73822	0.00624839	3.0123	86.5012		0.26	25.13	0.63	5.45	12.64	0.24	2.38		25-03-2013	30	15
2996.22	ML-05	Ol-15	52.3385	39.384	0.1075	12.9287	0.3084	0.1811	47.6799	0.2406	100.83		0.97501	0.00210413	0.26767	0.00614112	0.00379746	1.75968	0.00638179	3.02078	86.797		0.26	19.03	0.64	6.07	11.99	0.24	2.32		25-03-2013	30	15
2996.22	ML-05	Ol-15	56.3645	39.5672	0.0613	13.0489	0.325	0.1813	46.9042	0.2344	100.322		0.984371	0.00120576	0.271491	0.00650356	0.00382039	1.73958	0.00624797	3.01322	86.5002		0.26	31.86	0.63	5.83	11.91	0.24	2.36		25-03-2013	30	15
2996.22	ML-05	Ol-15	60.3905	39.4349	0.1054	13.069	0.3303	0.1658	46.9344	0.2386	100.278		0.981706	0.00207452	0.272081	0.00661383	0.003496	1.74181	0.00636398	3.01414	86.4898		0.26	19.37	0.63	5.7	12.84	0.24	2.34		25-03-2013	30	15
2996.22	ML-05	Ol-15	64.4165	39.4756	0.114	12.9387	0.3214	0.1824	47.0654	0.2339	100.331		0.981559	0.00224113	0.269051	0.00642802	0.00384148	1.74461	0.00623126	3.01396	86.6387		0.26	18.15	0.64	5.91	11.74	0.24	2.38		25-03-2013	30	15
2996.22	ML-05	Ol-15	68.4425	39.5774	0.1322	12.8585	0.3389	0.1842	46.8437	0.2337	100.169		0.984918	0.00260112	0.267609	0.00678373	0.00388265	1.73785	0.00623117	3.00988	86.656		0.26	16	0.64	5.51	11.92	0.24	2.37		25-03-2013	30	15
2996.22	ML-05	Ol-15	72.4685	39.496	0.0927	12.9186	0.3339	0.177	46.8437	0.2376	100.1		0.984191	0.00182634	0.269215	0.00669248	0.00373582	1.74015	0.00634353	3.01216	86.602		0.26	21.64	0.64	5.7	12.15	0.24	2.32		25-03-2013	30	15
2996.22	ML-05	Ol-15	76.4945	39.669	0.1082	12.9988	0.3363	0.1943	47.0049	0.2319	100.543		0.984207	0.00212245	0.269709	0.0067113	0.00408314	1.73855	0.00616445	3.01155	86.57		0.26	18.99	0.64	5.56	11.41	0.24	2.4		25-03-2013	30	15
2996.22	ML-05	Ol-5	0	39.7809	0.036	13.4699	0.2815	0.2087	46.4508	0.2515	100.479		0.989379	0.000707891	0.280161	0.00563132	0.00439639	1.72223	0.00670168	3.0092	86.0087		0.26	54.66	0.62	6.68	10.6	0.25	2.25		25-03-2013	30	15
2996.22	ML-05	Ol-5	6.99869	39.7198	0.0356	13.7004	0.351	0.1742	46.8236	0.2614	101.066		0.983807	0.000697153	0.283786	0.00699284	0.00365457	1.72892	0.00693691	3.0148	85.9003		0.26	51.78	0.62	5.36	12.03	0.25	2.16		25-03-2013	30	15
2996.22	ML-05	Ol-5	13.9987	39.8929	0.0344	13.9409	0.3128	0.2089	46.199	0.2504	100.839		0.990545	0.000675326	0.289485	0.00624727	0.00439343	1.7101	0.00666149	3.0081	85.5227		0.26	52.99	0.61	5.98	10.93	0.25	2.26		25-03-2013	30	15
2996.22	ML-05	Ol-5	20.9987	39.8725	0.077	14.2716	0.3064	0.1796	45.8766	0.2481	100.832		0.991123	0.00151328	0.296677	0.00612614	0.00378135	1.70002	0.00660752	3.00585	85.1416		0.26	25.53	0.6	6.03	12.19	0.25	2.28		25-03-2013	30	15
2996.22	ML-05	Ol-5	27.9987	39.73	0.026	14.1614	0.3187	0.2127	45.5744	0.2518	100.275		0.993178	0.000513875	0.296054	0.00640817	0.00450362	1.69839	0.00674406	3.00579	85.1561		0.26	72.62	0.61	5.97	10.22	0.25	2.26		25-03-2013	30	15
2996.22	ML-05	Ol-5	34.9987	39.6384	0.0485	14.4621	0.3219	0.19	45.6651	0.2466	100.573		0.989438	0.000957171	0.301897	0.00646304	0.00401709	1.69928	0.00659512	3.00865	84.914		0.26	39.45	0.6	5.78	11.39	0.25	2.29		25-03-2013	30	15
2996.22	ML-05	Ol-5	41.9987	39.8623	0.045	14.7427	0.3274	0.2026	45.4032	0.2469	100.83		0.993173	0.000886442	0.307181	0.00656122	0.00427551	1.68639	0.00659084	3.00505	84.5914		0.26	42.43	0.6	5.73	10.63	0.25	2.28		25-03-2013	30	15
2996.22	ML-05	Ol-5	48.9987	39.7809	0.0287	14.8629	0.3289	0.1798	45.2923	0.2499	100.723		0.992882	0.000566344	0.31023	0.00660284	0.00380101	1.68522	0.00668262	3.00598	84.4531		0.26	70.9	0.59	5.72	12.16	0.25	2.27		25-03-2013	30	15
2996.22	ML-05	Ol-5	55.9987	39.73	0.0413	14.9131	0.3296	0.1989	45.1312	0.2548	100.599		0.993151	0.000816248	0.311759	0.00662716	0.00421131	1.68183	0.00682423	3.00522	84.3619		0.26	46.99	0.59	5.68	11.3	0.25	2.22		25-03-2013	30	15
2996.22	ML-05	Ol-5	62.9987	39.8521	0.0574	14.8229	0.3122	0.2088	45.1513	0.2507	100.655		0.994792	0.00113284	0.309435	0.00626841	0.00441466	1.68019	0.00670491	3.00294	84.4476		0.26	33.36	0.59	6.02	10.45	0.25	2.27		25-03-2013	30	15
2996.22	ML-05	Ol-5	69.9987	39.6384	0.0377	15.0634	0.3149	0.2141	44.9599	0.256	100.484		0.99284	0.000746586	0.315531	0.00634424	0.00454219	1.67879	0.00687006	3.00567	84.1785		0.26	50.79	0.59	6.03	10.07	0.25	2.21		25-03-2013	30	15
2996.22	ML-05	Ol-5	76.9987	41.6432	0.0314	15.1135	0.3425	0.1989	41.7564	0.3153	99.4012		1.04743	0.00062443	0.317907	0.0069292	0.0042374	1.56571	0.00849689	2.95133	83.1225		0.25	59.39	0.59	5.45	10.75	0.26	1.89		25-03-2013	30	15
2996.22	ML-05	Ol-5	83.9987	39.5468	0.0423	15.1937	0.3048	0.1922	45.0506	0.2472	100.578		0.990325	0.000837494	0.318189	0.00613938	0.00407666	1.6818	0.00663242	3.008	84.0905		0.26	44.68	0.59	6.2	11.67	0.25	2.26		25-03-2013	30	15
2996.22	ML-05	Ol-5	90.9987	39.5774	0.0416	15.2538	0.3094	0.2004	44.698	0.2478	100.328		0.993606	0.000825726	0.320259	0.00624786	0.00426139	1.67288	0.0066654	3.00474	83.9319		0.26	43.85	0.58	6	11.1	0.25	2.29		25-03-2013	30	15
2996.22	ML-05	Ol-5	97.9987	39.6181	0.055	15.3941	0.3242	0.2045	44.7987	0.249	100.644		0.992154	0.00108899	0.322401	0.00653044	0.00433775	1.67248	0.00668102	3.00567	83.8385		0.26	33.91	0.58	5.8	10.75	0.25	2.27		25-03-2013	30	15
2996.22	ML-05	Ol-5	104.999	39.903	0.0263	15.4342	0.3464	0.2183	44.6577	0.247	100.833		0.997089	0.000519588	0.322529	0.00696226	0.00462027	1.66354	0.00661276	3.00187	83.7604		0.26	71.91	0.58	5.48	10.24	0.25	2.29		25-03-2013	30	15
2996.22	ML-05	Ol-5	111.999	39.5876	0.0347	15.3841	0.3424	0.2301	44.6073	0.2417	100.428		0.993719	0.000688668	0.322948	0.00691325	0.00489223	1.66924	0.00650038	3.0049	83.7893		0.26	55.99	0.58	5.51	9.76	0.25	2.33		25-03-2013	30	15
2996.22	ML-05	Ol-5	118.999	39.6893	0.057	15.4743	0.3164	0.2257	44.5771	0.2429	100.583		0.994629	0.00112937	0.324306	0.00637775	0.00479076	1.66536	0.00652188	3.00311	83.7005		0.26	34.12	0.58	6.01	9.95	0.25	2.31		25-03-2013	30	15
2996.22	ML-05	Ol-5	125.999	39.5061	0.0419	15.7148	0.3131	0.2033	44.4764	0.2407	100.496		0.992371	0.000832145	0.330123	0.00632611	0.00432546	1.66551	0.00647803	3.00597	83.4577		0.26	44.23	0.58	6.11	10.92	0.25	2.33		25-03-2013	30	15
2996.22	ML-05	Ol-5	132.999	39.557	0.057	15.775	0.2957	0.2063	44.557	0.2382	100.686		0.991818	0.00112995	0.330776	0.00596354	0.00438121	1.66545	0.00639894	3.00592	83.43		0.26	34.08	0.57	6.36	10.63	0.25	2.37		25-03-2013	30	15
2996.22	ML-05	Ol-5	139.999	39.5876	0.0707	15.6246	0.3152	0.2359	44.4159	0.2485	100.498		0.993771	0.00140321	0.328015	0.00636441	0.00501582	1.66217	0.00668362	3.00342	83.5183		0.26	27.63	0.58	6.01	9.08	0.25	2.29		25-03-2013	30	15
2996.22	ML-05	Ol-5	146.999	39.4858	0.0364	15.7048	0.3585	0.2232	44.3958	0.2424	100.447		0.992652	0.000723491	0.330176	0.00724919	0.00475265	1.66382	0.006529	3.0059	83.4415		0.26	52.35	0.58	5.25	10.07	0.25	2.33		25-03-2013	30	15
2996.22	ML-05	Ol-5	153.999	39.6181	0.044	15.775	0.3219	0.24	44.4461	0.2483	100.693		0.993433	0.000872315	0.330804	0.00649247	0.00509732	1.66145	0.00667083	3.00482	83.3955		0.26	42.15	0.57	5.9	9.48	0.25	2.26		25-03-2013	30	15
2996.22	ML-05	Ol-5	160.999	39.4145	0.0227	15.9654	0.3225	0.2057	44.4965	0.2481	100.675		0.989894	0.000450748	0.335327	0.00651487	0.00437575	1.66597	0.006676	3.0092	83.2445		0.26	83.92	0.57	5.84	10.67	0.25	2.28		25-03-2013	30	15
2996.22	ML-05	Ol-5	167.999	39.5672	0.0294	15.8652	0.3315	0.1833	44.1842	0.2433	100.404		0.995259	0.000584687	0.333735	0.006707	0.00390525	1.65682	0.00655693	3.00357	83.2341		0.26	62.24	0.57	5.74	12.02	0.25	2.31		25-03-2013	30	15
2996.22	ML-05	Ol-5	174.999	39.5061	0.0604	15.8351	0.3415	0.2279	44.4663	0.242	100.679		0.991284	0.00119825	0.332285	0.00689237	0.00484355	1.66331	0.00650589	3.00632	83.3491		0.26	32.11	0.57	5.57	9.94	0.25	2.33		25-03-2013	30	15
2996.22	ML-05	Ol-5	181.999	39.496	0.0166	16.0857	0.3341	0.2022	44.4965	0.2433	100.874		0.990383	0.000329105	0.337323	0.00673862	0.00429455	1.66335	0.00653657	3.00896	83.1396		0.26	113.11	0.57	5.72	10.96	0.25	2.29		25-03-2013	30	15
2996.22	ML-05	Ol-5	188.999	39.3128	0.0292	15.9353	0.2943	0.2366	44.3655	0.2324	100.406		0.98996	0.000581356	0.335584	0.00596098	0.00504643	1.66548	0.00627015	3.00888	83.2297		0.26	64.21	0.57	6.45	9.5	0.25	2.4		25-03-2013	30	15
2996.22	ML-05	Ol-5	195.999	39.3026	0.0372	15.9955	0.3166	0.2416	44.2749	0.2425	100.411		0.990035	0.00074088	0.336963	0.00641482	0.0051548	1.66263	0.00654484	3.00848	83.1484		0.26	50.58	0.57	6.02	9.29	0.25	2.32		25-03-2013	30	15
2996.22	ML-05	Ol-5	202.999	39.211	0.0627	15.9955	0.3328	0.2275	44.567	0.2329	100.629		0.985843	0.00124636	0.33632	0.00673019	0.0048447	1.67041	0.00627375	3.01166	83.2404		0.26	31.26	0.57	5.63	10	0.25	2.39		25-03-2013	30	15
2996.22	ML-05	Ol-5	209.999	39.557	0.0336	16.0756	0.3283	0.2217	44.2144	0.2389	100.67		0.993529	0.000667224	0.337661	0.00663242	0.00471638	1.6555	0.00642881	3.00514	83.059		0.26	55.36	0.57	5.7	10.21	0.25	2.34		25-03-2013	30	15
2996.22	ML-05	Ol-5	216.999	39.384	0.0405	16.0155	0.3443	0.1907	44.2547	0.2356	100.465		0.99128	0.000805948	0.337111	0.00697039	0.00406549	1.66052	0.00635345	3.00711	83.1245		0.26	47.49	0.57	5.54	12.08	0.25	2.38		25-03-2013	30	15
2996.22	ML-05	Ol-5	223.999	39.4044	0.0249	16.216	0.3398	0.2357	44.3252	0.2436	100.79		0.989802	0.000494514	0.340645	0.00686549	0.00501475	1.65983	0.006556	3.00921	82.9718		0.26	73.68	0.57	5.58	9.46	0.25	2.31		25-03-2013	30	15
2996.22	ML-05	Ol-5	230.999	39.3229	0.0645	15.9654	0.3422	0.2155	44.154	0.252	100.317		0.991118	0.00128533	0.336523	0.0069375	0.00460057	1.65904	0.00680514	3.00631	83.1365		0.26	29.3	0.57	5.59	10.63	0.25	2.24		25-03-2013	30	15
2996.22	ML-05	Ol-5	237.999	39.496	0.0247	15.9955	0.3346	0.2179	44.1439	0.2399	100.452		0.993946	0.000491453	0.336638	0.00677298	0.00464465	1.65611	0.00646841	3.00507	83.1069		0.26	75.55	0.57	5.68	10.12	0.25	2.35		25-03-2013	30	15
2996.22	ML-05	Ol-5	244.999	39.4756	0.0541	16.1157	0.3088	0.1956	44.1641	0.2481	100.562		0.992629	0.00107555	0.338894	0.00624568	0.00416594	1.65553	0.0066841	3.00522	83.0079		0.26	34.09	0.57	6.15	10.89	0.25	2.27		25-03-2013	30	15
2996.22	ML-05	Ol-5	251.999	39.3637	0.04	16.0456	0.31	0.1874	44.2044	0.2359	100.387		0.991528	0.000796609	0.338003	0.0062808	0.0039982	1.65991	0.00636642	3.00688	83.0821		0.26	47.5	0.57	6.14	11.68	0.25	2.37		25-03-2013	30	15
2996.22	ML-05	Ol-5	258.999	39.3331	0.0323	16.1759	0.3276	0.2121	44.2144	0.2386	100.534		0.990244	0.000642927	0.340571	0.00663394	0.00452283	1.65942	0.00643594	3.00847	82.9714		0.26	58.51	0.57	5.76	10.31	0.25	2.35		25-03-2013	30	15
2996.22	ML-05	Ol-5	265.999	39.3229	0.0512	16.1157	0.3227	0.2068	44.1641	0.2487	100.432		0.990602	0.00101976	0.339515	0.00653877	0.00441255	1.65856	0.00671253	3.00736	83.0079		0.26	37.1	0.57	5.87	10.66	0.25	2.28		25-03-2013	30	15
2996.22	ML-05	Ol-5	272.999	39.5468	0.0412	16.1759	0.2993	0.2237	44.1641	0.2432	100.694		0.99334	0.000818198	0.339789	0.00604695	0.00475924	1.65373	0.00654496	3.00502	82.9553		0.26	46.87	0.57	6.38	10.17	0.25	2.3		25-03-2013	30	15
2996.22	ML-05	Ol-5	279.999	39.3128	0.0264	16.1959	0.3401	0.2125	44.4159	0.2455	100.749		0.987989	0.000524563	0.340392	0.00687494	0.00452338	1.66405	0.0066104	3.01096	83.0181		0.26	70.41	0.57	5.61	10.36	0.25	2.29		25-03-2013	30	15
2996.22	ML-05	Ol-5	286.999	39.496	0.0558	16.216	0.3576	0.2274	44.3353	0.2395	100.928		0.990396	0.00110628	0.34006	0.0072127	0.00482984	1.65735	0.00643457	3.00739	82.975		0.26	33.68	0.57	5.25	9.63	0.25	2.34		25-03-2013	30	15
2996.22	ML-05	Ol-5	293.999	39.4654	0.065	16.1057	0.3393	0.2215	44.4361	0.2448	100.878		0.989601	0.00128864	0.337738	0.00684339	0.00470439	1.66107	0.00657677	3.00782	83.103		0.26	29.37	0.57	5.55	10.03	0.25	2.29		25-03-2013	30	15
2996.22	ML-05	Ol-5	300.999	39.5163	0.0486	16.216	0.3402	0.2309	44.295	0.2433	100.89		0.991176	0.000963798	0.340152	0.00686361	0.00490551	1.6563	0.00653844	3.0069	82.9621		0.26	39.54	0.57	5.55	9.73	0.25	2.3		25-03-2013	30	15
2996.22	ML-05	Ol-5	307.999	39.5061	0.0359	16.236	0.3093	0.2118	44.2346	0.2379	100.772		0.991982	0.000712704	0.340937	0.00624688	0.00450455	1.65581	0.00640017	3.00659	82.9253		0.26	52.98	0.57	6.08	10.83	0.25	2.36		25-03-2013	30	15
2996.22	ML-05	Ol-11	0	38.8243	0.0529	17.1781	0.217	0.1943	43.4186	0.3011	100.186		0.985836	0.00106202	0.364781	0.00443205	0.00417888	1.64356	0.00819161	3.01204	81.8367		0.26	37.43	0.55	8.14	11.45	0.26	1.96		25-03-2013	30	15
2996.22	ML-05	Ol-11	3.95197	39.7097	0.0893	13.4598	0.2926	0.1712	46.3702	0.2675	100.36		0.988531	0.0017576	0.280214	0.00585885	0.0036098	1.72085	0.0071347	3.00795	85.9967		0.26	22.37	0.62	6.38	12.43	0.25	2.15		25-03-2013	30	15
2996.22	ML-05	Ol-11	7.90197	39.6893	0.0524	12.9487	0.3482	0.1677	46.9243	0.264	100.395		0.986133	0.00102936	0.269057	0.0069588	0.00352923	1.73807	0.00702786	3.01181	86.5949		0.26	38.7	0.64	5.43	13.04	0.24	2.15		25-03-2013	30	15
2996.22	ML-05	Ol-11	11.852	39.7606	0.0452	12.9086	0.3151	0.1926	46.874	0.2545	100.351		0.987896	0.000887918	0.268222	0.00629725	0.00405323	1.7362	0.00677492	3.01033	86.6185		0.26	42.66	0.64	5.94	11.03	0.24	2.23		25-03-2013	30	15
2996.22	ML-05	Ol-11	15.802	39.7809	0.0775	12.8986	0.3112	0.1656	46.602	0.2509	100.087		0.99041	0.00152552	0.268558	0.00623195	0.0034921	1.72963	0.00669266	3.00654	86.5599		0.26	25.49	0.64	6.03	12.78	0.24	2.24		25-03-2013	30	15
2996.22	ML-05	Ol-11	19.752	39.7504	0.0842	12.9587	0.3136	0.1861	46.8437	0.2468	100.384		0.987312	0.00165349	0.269173	0.00626517	0.00391512	1.7345	0.00656774	3.00938	86.566		0.26	23.29	0.64	5.94	11.52	0.24	2.28		25-03-2013	30	15
2996.22	ML-05	Ol-11	23.702	39.5876	0.075	13.089	0.3109	0.1827	46.874	0.2432	100.362		0.984505	0.00147467	0.272221	0.00621905	0.00384843	1.7378	0.00648008	3.01255	86.4568		0.26	25.94	0.63	6.07	11.67	0.24	2.32		25-03-2013	30	15
2996.22	ML-05	Ol-11	27.652	39.6588	0.0905	13.0088	0.3002	0.1815	46.5516	0.2466	100.038		0.988577	0.00178359	0.271185	0.00601902	0.00383207	1.72987	0.006586	3.00786	86.4479		0.26	21.77	0.64	6.17	11.73	0.24	2.27		25-03-2013	30	15
2996.22	ML-05	Ol-11	31.602	39.7606	0.0907	12.9387	0.3348	0.2146	46.7329	0.2365	100.309		0.988277	0.00178241	0.268951	0.00669353	0.00451795	1.73164	0.00629818	3.00816	86.5564		0.26	22.08	0.64	5.54	9.83	0.24	2.35		25-03-2013	30	15
2996.22	ML-05	Ol-11	35.552	39.5876	0.0868	12.9186	0.3348	0.187	46.6221	0.2337	99.9706		0.987435	0.00171177	0.269477	0.00671706	0.00395073	1.7336	0.00624548	3.00914	86.5469		0.26	22.84	0.64	5.65	11.61	0.24	2.37		25-03-2013	30	15
2996.22	ML-05	Ol-11	39.502	39.9132	0.0711	12.9487	0.3494	0.183	46.6624	0.2329	100.361		0.991189	0.001396	0.26892	0.00697922	0.00384925	1.72749	0.00619679	3.00602	86.5298		0.26	29.03	0.64	5.36	11.9	0.24	2.38		25-03-2013	30	15
2996.22	ML-05	Ol-11	43.452	39.6791	0.0524	12.9287	0.3043	0.188	46.5818	0.2352	99.9695		0.989547	0.00103319	0.26964	0.00610408	0.00397116	1.73181	0.00628448	3.00839	86.5277		0.26	38.54	0.64	6.22	11.42	0.24	2.36		25-03-2013	30	15
2996.22	ML-05	Ol-11	47.402	39.8521	0.0903	12.8786	0.3054	0.2078	46.6422	0.2347	100.211		0.990766	0.00177494	0.267758	0.00610706	0.00437573	1.72865	0.00625158	3.00568	86.588		0.26	22.68	0.64	6.13	10.18	0.24	2.35		25-03-2013	30	15
2996.22	ML-05	Ol-10	0	39.3637	0.0385	19.393	0.1907	0.2341	40.1446	0.8486	100.213		1.0084	0.000779779	0.415467	0.00392944	0.00507952	1.5331	0.0232914	2.99004	78.6783		0.25	50.09	0.51	9.22	9.64	0.27	0.97		25-03-2013	30	15
2996.22	ML-05	Ol-10	5.0211	38.7938	0.0371	18.7215	0.2138	0.2554	41.8874	0.2849	100.194		0.991725	0.000749858	0.400245	0.00439624	0.00553014	1.59632	0.00780332	3.00677	79.9533		0.26	49.1	0.52	8.26	8.86	0.26	2.06		25-03-2013	30	15
2996.22	ML-05	Ol-10	10.0411	39.0278	0.05	17.5589	0.2215	0.2184	42.935	0.2564	100.268		0.991168	0.00100396	0.37293	0.00452471	0.00469798	1.62552	0.00697668	3.00682	81.3391		0.26	38.53	0.54	8.12	10.26	0.26	2.22		25-03-2013	30	15
2996.22	ML-05	Ol-10	15.0611	39.2619	0.0049	15.8251	0.2405	0.1989	44.295	0.2436	100.07		0.991299	9.78149e-05	0.334146	0.00488419	0.00425357	1.66724	0.00658974	3.00851	83.3043		0.26	382.07	0.57	7.53	10.74	0.25	2.29		25-03-2013	30	15
2996.22	ML-05	Ol-10	20.0811	39.6384	0.0736	14.6224	0.292	0.1801	45.2722	0.2465	100.325		0.992067	0.00145639	0.306055	0.00587829	0.00381789	1.68914	0.00660996	3.00502	84.6604		0.25	26.5	0.59	6.27	11.64	0.25	2.25		25-03-2013	30	15
2996.22	ML-05	Ol-10	25.1011	39.7097	0.0428	13.8106	0.3003	0.1761	45.7759	0.2421	100.057		0.99298	0.000846181	0.288811	0.00604009	0.00372983	1.70643	0.00648629	3.00533	85.525		0.25	43.7	0.61	6.19	12.09	0.25	2.29		25-03-2013	30	15
2996.22	ML-05	Ol-10	30.1211	39.6995	0.0493	13.6102	0.3106	0.1991	46.1083	0.247	100.224		0.990521	0.000972526	0.283987	0.00623339	0.00420761	1.71501	0.00660288	3.00753	85.7935		0.26	39.18	0.62	5.94	10.48	0.25	2.27		25-03-2013	30	15
2996.22	ML-05	Ol-10	35.1411	39.8929	0.0371	13.3997	0.3227	0.1865	46.2091	0.2427	100.291		0.993323	0.000730373	0.279027	0.00646306	0.00393333	1.71526	0.00647475	3.00522	86.0087		0.25	50.54	0.62	5.76	11.41	0.25	2.29		25-03-2013	30	15
2996.22	ML-05	Ol-10	40.1611	39.6893	0.0521	13.6102	0.3382	0.1928	46.0781	0.2455	100.206		0.990536	0.00102804	0.284064	0.00678913	0.00407558	1.71435	0.00656456	3.00741	85.7855		0.25	37.34	0.62	5.61	11.05	0.25	2.27		25-03-2013	30	15
2996.22	ML-05	Ol-10	45.1811	39.5876	0.0617	13.4799	0.3238	0.1742	45.7658	0.2365	99.6295		0.992904	0.00122351	0.282742	0.00653235	0.00370069	1.71119	0.00635532	3.00465	85.8199		0.25	32.21	0.62	5.73	12.31	0.25	2.34		25-03-2013	30	15
2996.22	ML-05	Ol-10	50.2011	39.5672	0.0535	13.4498	0.3225	0.1715	45.6147	0.2464	99.4256		0.994284	0.00106293	0.282649	0.00651852	0.00365027	1.70879	0.00663397	3.00359	85.8068		0.25	35.42	0.62	5.74	12.25	0.25	2.25		25-03-2013	30	15
2996.22	ML-05	Ol-10	55.2211	39.3331	0.05	13.6202	0.3262	0.208	45.514	0.2518	99.3033		0.99117	0.000996174	0.287031	0.00661177	0.00443955	1.70979	0.00679834	3.00684	85.6256		0.26	38.35	0.61	5.72	10.33	0.25	2.22		25-03-2013	30	15
2996.22	ML-05	Ol-10	60.2411	39.5876	0.0472	13.6603	0.2937	0.1774	45.6651	0.2527	99.6839		0.99314	0.000936201	0.286594	0.00592652	0.00376956	1.70783	0.00679226	3.00499	85.6302		0.25	39.29	0.61	6.27	11.95	0.25	2.2		25-03-2013	30	15
2996.22	ML-05	Ol-10	65.2611	39.5367	0.0649	13.7705	0.3111	0.1906	45.4838	0.2439	99.6014		0.993247	0.00128907	0.28931	0.00628639	0.0040557	1.70342	0.00656488	3.00417	85.4817		0.26	29.58	0.61	6.03	11.21	0.25	2.28		25-03-2013	30	15
2996.22	ML-05	Ol-10	70.2811	39.5977	0.0728	13.8507	0.343	0.1883	45.6046	0.2471	99.9043		0.992193	0.00144222	0.290238	0.00691296	0.00399634	1.70351	0.00663371	3.00492	85.4426		0.25	26.13	0.61	5.44	11.37	0.25	2.27		25-03-2013	30	15
2996.22	ML-05	Ol-10	75.3011	39.5367	0.0392	13.9309	0.308	0.1732	45.6349	0.2485	99.8713		0.991465	0.000777211	0.292154	0.00621258	0.00367884	1.70602	0.0066767	3.00698	85.3789		0.26	49.95	0.61	6.04	12.03	0.25	2.25		25-03-2013	30	15
2996.22	ML-05	Ol-10	80.3211	39.8521	0.0748	13.971	0.3107	0.181	45.5442	0.248	100.182		0.995495	0.00147729	0.291857	0.0062427	0.00382958	1.69601	0.00663738	3.00155	85.3181		0.25	26.09	0.61	5.99	11.8	0.25	2.26		25-03-2013	30	15
2996.22	ML-05	Ol-10	85.3411	39.9234	0.0647	14.1714	0.321	0.1631	45.796	0.2564	100.696		0.993158	0.00127254	0.294822	0.00642303	0.00343661	1.69835	0.00683387	3.0043	85.2084		0.25	29.47	0.61	5.84	13.08	0.25	2.22		25-03-2013	30	15
2996.22	ML-05	Ol-10	90.3611	39.9234	0.0539	14.2817	0.3267	0.19	45.7658	0.2355	100.777		0.992994	0.00105995	0.297067	0.00653601	0.00400275	1.69695	0.00627578	3.00489	85.1021		0.25	35.59	0.6	5.82	11.28	0.25	2.37		25-03-2013	30	15
2996.22	ML-05	Ol-10	95.3811	39.6079	0.067	14.2516	0.319	0.2203	46.34	0.2577	101.064		0.98347	0.00131531	0.295937	0.00637109	0.00463319	1.71532	0.0068557	3.0139	85.2859		0.25	27.21	0.6	5.91	9.64	0.25	2.18		25-03-2013	30	15
2996.22	ML-05	Ol-10	100.401	39.6588	0.0424	14.432	0.3421	0.217	45.655	0.2524	100.6		0.989752	0.00083662	0.30121	0.00686727	0.00458704	1.69857	0.00674892	3.00857	84.9379		0.26	45.36	0.6	5.5	9.86	0.25	2.24		25-03-2013	30	15
2996.22	ML-05	Ol-10	105.421	39.6588	0.0671	14.3819	0.3407	0.1841	45.4938	0.2578	100.384		0.991279	0.00132603	0.300627	0.00684971	0.00389759	1.69519	0.00690394	3.00607	84.9371		0.26	29.08	0.6	5.55	11.76	0.25	2.19		25-03-2013	30	15
2996.22	ML-05	Ol-10	110.441	39.6486	0.0549	14.3919	0.3197	0.1888	45.514	0.2487	100.367		0.991232	0.00108516	0.3009	0.00642886	0.00399793	1.69629	0.00666163	3.0066	84.9339		0.26	35.44	0.6	5.93	11.52	0.25	2.28		25-03-2013	30	15
2996.22	ML-05	Ol-10	115.461	39.6995	0.0445	14.4119	0.3232	0.19	45.524	0.2586	100.452		0.99174	0.000878918	0.301087	0.00649424	0.00402024	1.69536	0.00692148	3.0065	84.9189		0.26	43.41	0.6	5.83	11.53	0.25	2.2		25-03-2013	30	15
2996.22	ML-05	Ol-10	120.481	39.7606	0.0364	14.5322	0.3216	0.2072	45.4938	0.2568	100.609		0.992213	0.000718173	0.303278	0.00645524	0.00437954	1.69244	0.00686602	3.00635	84.8036		0.25	52.73	0.6	5.89	10.48	0.25	2.22		25-03-2013	30	15
2996.22	ML-05	Ol-10	125.501	39.4349	0.0695	14.5122	0.3266	0.1831	45.383	0.2549	100.164		0.988856	0.00137788	0.304327	0.00658738	0.0038889	1.6965	0.00684826	3.00839	84.7899		0.26	28.24	0.6	5.77	12.22	0.25	2.21		25-03-2013	30	15
2996.22	ML-05	Ol-10	130.521	39.6791	0.0285	14.5322	0.3275	0.2113	45.4334	0.25	100.462		0.991857	0.000563257	0.303791	0.00658479	0.00447375	1.69305	0.00669552	3.00702	84.7864		0.26	68.25	0.6	5.78	10.36	0.25	2.25		25-03-2013	30	15
2996.22	ML-05	Ol-10	135.541	39.7809	0.052	14.6725	0.3771	0.1843	45.3528	0.2523	100.672		0.992689	0.00102593	0.306196	0.00756901	0.00389538	1.68714	0.00674549	3.00526	84.639		0.26	35.76	0.6	5.04	11.61	0.25	2.24		25-03-2013	30	15
2996.22	ML-05	Ol-10	140.561	39.6791	0.0783	14.7026	0.3333	0.2104	45.242	0.25	100.496		0.991986	0.00154768	0.307393	0.00670228	0.00445528	1.68614	0.00669639	3.00492	84.5805		0.26	24.66	0.59	5.72	10.03	0.25	2.25		25-03-2013	30	15
2996.22	ML-05	Ol-10	145.581	39.5977	0.0429	14.8529	0.3424	0.2219	45.2923	0.2554	100.606		0.990094	0.000848084	0.310581	0.00688627	0.00469947	1.68826	0.00684202	3.00821	84.462		0.26	46.4	0.59	5.49	9.98	0.25	2.21		25-03-2013	30	15
2996.22	ML-05	Ol-10	150.601	39.6791	0.0562	14.8529	0.3389	0.2146	45.2017	0.2455	100.589		0.991884	0.00111073	0.310504	0.00681419	0.00454375	1.68446	0.00657518	3.00589	84.4357		0.26	34.52	0.59	5.62	10.31	0.25	2.31		25-03-2013	30	15
2996.22	ML-05	Ol-10	155.621	39.6791	0.0706	14.8028	0.3409	0.2046	45.1513	0.2464	100.496		0.992434	0.00139611	0.309628	0.0068582	0.00433442	1.68352	0.00660295	3.00477	84.4654		0.26	27.32	0.59	5.54	10.83	0.25	2.29		25-03-2013	30	15
2996.22	ML-05	Ol-10	160.641	39.2721	0.0566	14.8329	0.328	0.1702	45.1312	0.2596	100.051		0.987673	0.00112544	0.311969	0.00663509	0.00362556	1.69205	0.00699506	3.01008	84.4329		0.26	34.09	0.59	5.79	13.05	0.25	2.18		25-03-2013	30	15
2996.22	ML-05	Ol-10	165.661	39.5774	0.0291	14.883	0.3259	0.2262	45.0405	0.2483	100.33		0.99232	0.000576864	0.312069	0.00657254	0.00480378	1.68351	0.00667021	3.00653	84.362		0.26	67.39	0.59	5.76	9.83	0.25	2.28		25-03-2013	30	15
2996.22	ML-05	Ol-10	170.681	39.7198	0.0646	14.903	0.3055	0.2421	45.1513	0.2575	100.644		0.992421	0.00127613	0.3114	0.00613965	0.00512353	1.68177	0.00689324	3.00503	84.3766		0.26	29.82	0.59	6.11	8.97	0.25	2.21		25-03-2013	30	15
2996.22	ML-05	Ol-6	0	39.7826	0.049983	13.3	0.321371	0.168229	45.5481	0.256488	99.463		0.997609	0.00099098	0.278917	0.00648213	0.00357317	1.70273	0.00689116	2.99827	85.925		0.211434	32.8466	0.501719	6.67438	7.97569	0.1731	4.73515		18-03-2014	30	15
2996.22	ML-05	Ol-6	6.15407	40.0203	0.080293	12.5814	0.342751	0.165661	46.2169	0.221698	99.6742		0.997612	0.00158247	0.262281	0.00687233	0.00349774	1.71748	0.00592108	2.99657	86.7519		0.210897	20.6838	0.516762	6.51015	8.03618	0.171435	5.45955		18-03-2014	30	15
2996.22	ML-05	Ol-6	12.3041	40.0678	0.060515	12.4887	0.369348	0.165517	46.2789	0.228544	99.6997		0.998332	0.00119211	0.260227	0.00740217	0.00349308	1.71898	0.00610109	2.99691	86.852		0.210733	27.1634	0.518369	6.06628	8.02073	0.171252	5.36352		18-03-2014	30	15
2996.22	ML-05	Ol-6	18.4541	39.834	0.094129	12.1169	0.387175	0.193656	46.5083	0.214184	99.3802		0.994763	0.00185851	0.253054	0.00777709	0.00409621	1.73143	0.00573074	2.99965	87.2484		0.211388	17.5171	0.526731	5.77403	6.73776	0.170654	5.53324		18-03-2014	30	15
2996.22	ML-05	Ol-6	24.6041	40.0068	0.088948	12.0886	0.411076	0.158749	46.5876	0.19219	99.5677		0.996585	0.00175183	0.251833	0.00823657	0.00334948	1.73005	0.00512943	2.99793	87.2933		0.21102	19.3075	0.527015	5.56655	8.22467	0.170495	5.99895		18-03-2014	30	15
2996.22	ML-05	Ol-6	30.7541	39.8734	0.0784	11.9098	0.391702	0.165092	46.4754	0.216335	99.1566		0.996663	0.00154938	0.248958	0.00787526	0.00349524	1.7318	0.00579361	2.9975	87.4312		0.211365	21.93	0.531613	5.71494	7.99457	0.170665	5.40361		18-03-2014	30	15
2996.22	ML-05	Ol-6	36.9041	40.0779	0.111191	11.5825	0.348524	0.153766	46.6476	0.228704	99.1869		0.99925	0.00219187	0.241506	0.00698949	0.00324725	1.73383	0.00610943	2.99421	87.774		0.210803	15.2234	0.539041	6.49609	8.62098	0.170126	5.2215		18-03-2014	30	15
2996.22	ML-05	Ol-6	43.0541	40.0311	0.07628	11.6651	0.425455	0.150473	46.7837	0.202381	99.4041		0.996577	0.00150141	0.242861	0.00851944	0.00317291	1.73627	0.0053981	2.99634	87.7289		0.210967	22.3345	0.537929	5.44196	8.78499	0.169856	5.72921		18-03-2014	30	15
2996.22	ML-05	Ol-6	49.2041	40.0718	0.095842	11.6335	0.413504	0.165039	46.9526	0.204403	99.578		0.99599	0.00188342	0.241815	0.00826685	0.00347447	1.73974	0.00544329	2.99782	87.7967		0.210907	18.2589	0.538885	5.57347	8.13579	0.169607	5.59632		18-03-2014	30	15
2996.22	ML-05	Ol-6	55.3541	39.8781	0.08119	11.4088	0.385496	0.133671	47.0003	0.196621	99.1385		0.994576	0.00160096	0.237958	0.00773334	0.00282375	1.74748	0.00525401	2.99903	88.0149		0.211455	21.4937	0.544202	5.94258	9.64291	0.169345	5.87745		18-03-2014	30	15
2996.22	ML-05	Ol-6	61.5041	39.9574	0.104995	11.5469	0.399148	0.167454	47.2149	0.221264	99.676		0.991914	0.00206073	0.239717	0.00796993	0.00352093	1.74729	0.00588498	3.00022	87.9358		0.211298	16.3765	0.540496	5.80231	7.65776	0.169048	5.20159		18-03-2014	30	15
2996.22	ML-05	Ol-6	67.6541	40.0336	0.091037	11.2782	0.423186	0.158584	47.2451	0.204506	99.4861		0.994479	0.00178799	0.234297	0.00845564	0.00333669	1.74959	0.00544296	2.99891	88.19		0.211051	19.6266	0.547667	5.37767	8.07154	0.168851	5.64611		18-03-2014	30	15
2996.22	ML-05	Ol-6	73.8041	40.0335	0.077805	11.3917	0.413442	0.163565	47.1378	0.199564	99.4779		0.994939	0.00152882	0.236765	0.00826478	0.00344309	1.74643	0.00531389	2.99846	88.0614		0.211072	21.0012	0.545158	5.59889	8.12787	0.169097	5.78979		18-03-2014	30	15
2996.22	ML-05	Ol-6	79.9541	40.0519	0.069596	11.3789	0.397382	0.170825	47.3842	0.190796	99.6873		0.993556	0.00136499	0.236062	0.00792905	0.00358927	1.75231	0.00507103	3.00116	88.1279		0.211047	24.2464	0.544774	5.72151	7.68728	0.168653	6.11144		18-03-2014	30	15
2996.22	ML-05	Ol-6	86.1041	40.0061	0.0933	11.2895	0.374575	0.144434	47.3039	0.213176	99.4767		0.993764	0.00183237	0.234524	0.0074841	0.00303887	1.75171	0.00567353	2.99954	88.1925		0.211052	18.5839	0.547036	5.99845	9.24376	0.168734	5.50123		18-03-2014	30	15
2996.22	ML-05	Ol-6	92.2541	39.7698	0.097309	11.1722	0.384757	0.161608	47.1414	0.536764	99.3185		0.990499	0.00191615	0.2327	0.00770781	0.00340918	1.7503	0.0143233	3.00246	88.2653		0.211699	16.9894	0.550837	6.01497	7.90821	0.16899	2.87724		18-03-2014	30	15
2996.22	ML-05	Ol-6	98.4041	40.0415	0.088089	11.2986	0.437188	0.139596	47.2916	0.2066	99.5577		0.994046	0.00172899	0.234572	0.00872988	0.00293531	1.7502	0.00549521	2.99931	88.1814		0.211028	19.5897	0.547299	5.22003	9.24874	0.16879	5.53215		18-03-2014	30	15
2996.22	ML-05	Ol-6	104.554	39.9734	0.080838	11.1094	0.396601	0.139454	47.1167	0.189071	99.0464		0.996511	0.00159332	0.23161	0.00795259	0.00294461	1.75103	0.00505003	2.9979	88.3181		0.211152	20.9689	0.550949	5.69901	9.20747	0.168945	6.0748		18-03-2014	30	15
2996.22	ML-05	Ol-6	110.704	40.1627	0.101261	11.171	0.380901	0.166791	47.3831	0.189169	99.5943		0.995764	0.00198496	0.231623	0.00759608	0.00350261	1.75132	0.00502506	2.99797	88.3192		0.210602	16.7453	0.549495	5.90736	7.80303	0.168464	6.01496		18-03-2014	30	15
2996.22	ML-05	Ol-6	116.854	39.9619	0.098813	11.1915	0.376887	0.131365	47.3818	0.211975	99.3927		0.993274	0.00194184	0.232631	0.00753491	0.00276559	1.75567	0.00564502	3.00059	88.3		0.211217	17.1725	0.549279	5.96805	9.80784	0.168456	5.41631		18-03-2014	30	15
2996.22	ML-05	Ol-6	123.004	40.1111	0.118516	11.2147	0.384701	0.142489	47.2809	0.203596	99.49		0.995713	0.00232607	0.232816	0.00768134	0.00299596	1.7497	0.00541498	2.99764	88.2565		0.210806	15.0051	0.548229	5.91094	9.23063	0.168713	5.76618		18-03-2014	30	15
2996.22	ML-05	Ol-6	129.154	40.139	0.089332	11.3215	0.375289	0.16659	47.5149	0.196578	99.8431		0.993626	0.00174839	0.234378	0.0074725	0.00349294	1.75345	0.00521373	3.00055	88.2094		0.210757	18.5152	0.546151	6.06038	7.90338	0.168323	5.91175		18-03-2014	30	15
2996.22	ML-05	Ol-6	135.304	40.0968	0.086443	11.3033	0.397407	0.170654	47.4963	0.208552	99.8111		0.99294	0.00169246	0.234086	0.00791576	0.00357944	1.7534	0.00553331	3.00066	88.222		0.210906	19.8701	0.545978	5.7323	7.70235	0.16838	5.5855		18-03-2014	30	15
2996.22	ML-05	Ol-6	141.454	40.1404	0.084932	11.2094	0.394716	0.163721	47.3424	0.235861	99.6192		0.995357	0.00166511	0.232453	0.00787274	0.00343865	1.75007	0.0062663	2.99852	88.2749		0.210814	20.1161	0.548721	5.74973	7.97869	0.168634	5.02879		18-03-2014	30	15
2996.22	ML-05	Ol-6	147.604	40.2828	0.087239	11.251	0.359309	0.137241	47.4071	0.208911	99.775		0.996915	0.00170697	0.232855	0.00715238	0.00287679	1.749	0.00553933	2.99726	88.2507		0.210387	20.0713	0.548292	6.35408	9.54513	0.168512	5.63222		18-03-2014	30	15
2996.22	ML-05	Ol-6	153.754	40.0459	0.084248	11.1786	0.372436	0.172774	47.2161	0.212944	99.3275		0.995798	0.00165634	0.232464	0.00744918	0.00363896	1.7503	0.00567331	2.99828	88.2757		0.211029	19.7511	0.549579	6.01563	7.61173	0.168854	5.40716		18-03-2014	30	15
2996.22	ML-05	Ol-6	159.904	40.3047	0.140045	11.3458	0.395356	0.163588	47.3861	0.197128	99.976		0.995841	0.00273575	0.234437	0.00785717	0.00342351	1.74539	0.00521843	2.99617	88.1588		0.210338	11.9376	0.544873	5.72612	8.16293	0.168637	5.79354		18-03-2014	30	15
2996.22	ML-05	Ol-7	0	38.7741	0.035143	17.5384	0.184708	0.216062	42.1672	0.299827	99.257		0.994464	0.000712626	0.376178	0.00381046	0.00469366	1.61224	0.00823903	3.0016	81.0816		0.214031	46.4303	0.434454	11.578	6.38624	0.182556	4.25309		18-03-2014	30	15
2996.22	ML-05	Ol-7	5.02892	39.3114	0.070348	13.8885	0.329352	0.180782	45.1948	0.235995	99.2433		0.991687	0.00140308	0.293	0.00668283	0.00386275	1.69963	0.00637847	3.00359	85.2958		0.212861	23.5933	0.490723	6.73013	7.41316	0.174185	5.10782		18-03-2014	30	15
2996.22	ML-05	Ol-7	10.0289	39.5543	0.050166	12.9413	0.285491	0.165658	45.9787	0.255911	99.2729		0.99268	0.000995406	0.271612	0.00576304	0.00352139	1.72021	0.00688117	3.00288	86.3636		0.212252	33.4225	0.509058	7.7314	8.04164	0.172074	4.74723		18-03-2014	30	15
2996.22	ML-05	Ol-7	15.0289	39.6786	0.058029	12.6132	0.371518	0.171754	46.0755	0.232825	99.241		0.994672	0.00115012	0.264426	0.00749113	0.00364684	1.72188	0.00625332	3.00069	86.6875		0.21189	27.8534	0.516164	6.00783	7.50263	0.171737	5.20812		18-03-2014	30	15
2996.22	ML-05	Ol-7	20.0289	39.7336	0.085785	12.4844	0.352849	0.182292	46.3068	0.216973	99.4073		0.993513	0.00169591	0.26106	0.00709657	0.00386073	1.72611	0.00581272	3.00047	86.8628		0.211767	19.4523	0.518921	6.25401	7.3229	0.171284	5.42248		18-03-2014	30	15
2996.22	ML-05	Ol-7	25.0289	39.7233	0.050044	12.501	0.363039	0.16664	46.6611	0.212793	99.7265		0.990524	0.000986614	0.260688	0.00728143	0.00351953	1.73454	0.00568506	3.00465	86.9344		0.211873	33.8877	0.51796	6.24333	7.89578	0.170562	5.48671		18-03-2014	30	15
2996.22	ML-05	Ol-7	30.0289	39.5975	0.061732	12.3063	0.379331	0.152977	46.5265	0.19574	99.253		0.991463	0.00122207	0.257687	0.00763961	0.0032443	1.73667	0.00525105	3.00415	87.0792		0.212185	26.0836	0.522161	5.90075	8.36598	0.170709	5.91527		18-03-2014	30	15
2996.22	ML-05	Ol-7	35.0289	39.7201	0.074632	12.1195	0.368333	0.135422	46.7067	0.194049	99.3646		0.991997	0.00147367	0.253128	0.0073992	0.00286467	1.73895	0.00519241	3.00236	87.2933		0.21186	22.8777	0.527071	6.13765	9.90919	0.170263	5.7835		18-03-2014	30	15
2996.22	ML-05	Ol-7	40.0289	39.7089	0.088881	12.026	0.417166	0.165072	46.7954	0.21407	99.4646		0.990711	0.00175325	0.250921	0.00837166	0.00348833	1.74049	0.00572232	3.0029	87.3998		0.211792	18.603	0.527826	5.35678	7.93649	0.169993	5.31873		18-03-2014	30	15
2996.22	ML-05	Ol-7	45.0289	39.7099	0.095031	11.9856	0.383086	0.166842	46.9087	0.199521	99.5047		0.989904	0.00187299	0.249868	0.0076813	0.00352278	1.74324	0.00532894	3.00306	87.4634		0.211875	18.028	0.529749	5.9533	7.91682	0.169757	5.70719		18-03-2014	30	15
2996.22	ML-05	Ol-7	50.0289	39.7549	0.131432	11.8186	0.382563	0.146754	46.8176	0.212111	99.3171		0.991726	0.00259226	0.24656	0.00767623	0.00310082	1.74108	0.0056692	2.99997	87.5953		0.211627	13.5211	0.533231	6.01424	8.95411	0.169821	5.4259		18-03-2014	30	15
2996.22	ML-05	Ol-7	55.0289	39.8942	0.099992	11.6808	0.402036	0.157814	46.961	0.212297	99.4515		0.993384	0.00196856	0.243241	0.00805223	0.00332842	1.74322	0.00566381	3.00013	87.7551		0.211225	16.6074	0.53691	5.65558	8.46509	0.169489	5.47617		18-03-2014	30	15
2996.22	ML-05	Ol-7	60.0289	39.9445	0.099465	11.6254	0.408428	0.145461	47.0514	0.205023	99.5261		0.993488	0.00195592	0.241807	0.00817081	0.00306435	1.74456	0.00546344	2.99988	87.8267		0.211237	17.0666	0.537981	5.64414	8.75602	0.169357	5.72278		18-03-2014	30	15
2996.22	ML-05	Ol-9	0	38.7478	0.051173	18.0614	0.218838	0.217421	41.6691	0.278377	99.2675		0.996206	0.0010402	0.388338	0.00452552	0.00473467	1.59707	0.0076682	3.0003	80.4404		0.214065	31.403	0.42779	9.59436	6.58206	0.183943	4.5429		18-03-2014	30	15
2996.22	ML-05	Ol-9	5	38.9386	0.033505	16.8602	0.30077	0.208231	42.8029	0.244675	99.4076		0.994522	0.00067658	0.360125	0.00617892	0.00450469	1.62973	0.00669547	3.003	81.902		0.213619	46.3553	0.443545	7.15784	6.72286	0.180752	4.96698		18-03-2014	30	15
2996.22	ML-05	Ol-9	10	39.1264	0.038262	16.518	0.270608	0.230677	42.9418	0.251969	99.4015		0.997228	0.000771023	0.352077	0.00554765	0.00497983	1.6316	0.00688065	2.9998	82.2513		0.213049	41.5558	0.448499	8.10127	6.05747	0.180256	4.8484		18-03-2014	30	15
2996.22	ML-05	Ol-9	15	39.1175	-0.15235	16.7192	0.29231	0.196294	42.912	0.251508	99.3665		0.999141	-0.00307662	0.357131	0.00600542	0.00424667	1.63397	0.0068828	3.0052	82.0636		0.2131	0	0.445436	7.49939	7.04145	0.180349	4.82827		18-03-2014	30	15
2996.22	ML-05	Ol-9	20	38.8133	0.018362	16.7177	0.299224	0.224422	42.898	0.225532	99.2242		0.992847	0.000371362	0.35763	0.00615661	0.00486242	1.63586	0.00618112	3.00474	82.0601		0.213992	87.356	0.445284	7.30583	6.23174	0.180533	5.39386		18-03-2014	30	15
2996.22	ML-05	Ol-9	25	39.0455	0.063849	16.632	0.250989	0.198476	42.8114	0.246052	99.2782		0.996613	0.0012885	0.355023	0.00515293	0.00429091	1.62901	0.00672884	2.99901	82.106		0.21319	24.7319	0.446894	8.71247	6.935	0.180569	5.00839		18-03-2014	30	15
2996.22	ML-05	Ol-9	30	39.0747	0.023073	16.7185	0.298909	0.216552	42.9859	0.229968	99.5801		0.9952	0.000464616	0.356097	0.00612347	0.00467157	1.63211	0.00627537	3.00192	82.0895		0.213216	68.6724	0.44574	7.34115	6.60707	0.18026	5.29557		18-03-2014	30	15
2996.22	ML-05	Ol-9	35	38.7959	0.023428	16.7106	0.302615	0.333736	42.8624	0.250681	99.3165		0.991931	0.000473594	0.357309	0.00622343	0.00722744	1.63373	0.00686712	3.00488	82.0542		0.214032	68.9221	0.445726	7.26897	3.84043	0.180588	4.91881		18-03-2014	30	15
2996.22	ML-05	Ol-9	40	38.9207	0.046983	16.5615	0.297857	0.236494	42.9539	0.236582	99.2833		0.993927	0.000948615	0.353696	0.00611823	0.0051154	1.63525	0.00647312	3.00241	82.217		0.213671	32.4933	0.447732	7.35383	5.99213	0.180214	5.04997		18-03-2014	30	15
2996.22	ML-05	Ol-9	45	39.0105	0.042662	16.8046	0.296073	0.232502	42.9375	0.238139	99.583		0.994215	0.000859638	0.358165	0.00606934	0.00501893	1.63134	0.0065026	3.0028	81.9973		0.213304	36.8895	0.44375	7.46753	6.20069	0.180345	5.14192		18-03-2014	30	15
2996.22	ML-05	Ol-9	50	38.9631	0.010813	16.5666	0.285101	0.221839	42.7511	0.246831	99.0791		0.996888	0.000218733	0.354472	0.00586726	0.00480747	1.63061	0.00676629	3.00064	82.1431		0.213297	146.508	0.447202	7.90759	6.34049	0.180551	4.88163		18-03-2014	30	15
2996.22	ML-05	Ol-9	55	39.0062	0.025099	16.6973	0.276871	0.230014	42.9934	0.24718	99.502		0.994405	0.000505896	0.355985	0.00567742	0.00496672	1.63395	0.0067515	3.00302	82.1108		0.213284	63.1195	0.445531	7.98636	6.15886	0.180086	4.88614		18-03-2014	30	15
2996.22	ML-05	Ol-9	60	38.9721	0.04644	16.6417	0.265637	0.217951	42.806	0.228847	99.2067		0.995916	0.000938288	0.35565	0.00546011	0.00471752	1.63073	0.00626573	3.00052	82.0956		0.213363	34.1934	0.446227	8.20086	6.45747	0.180553	5.25751		18-03-2014	30	15
2996.22	ML-05	Ol-9	65	38.948	0.008181	16.5664	0.310636	0.212496	42.8422	0.217473	99.1434		0.995893	0.00016539	0.354251	0.00638886	0.00460218	1.63308	0.00595786	3.00149	82.1745		0.213452	193.325	0.447612	7.09915	6.60818	0.18047	5.47025		18-03-2014	30	15
2996.22	ML-05	Ol-9	70	38.9701	0.03622	16.5685	0.276158	0.22248	42.6882	0.222248	99.0216		0.997303	0.000732858	0.354597	0.00568456	0.0048225	1.62859	0.00609384	2.99896	82.1199		0.213428	43.9692	0.447536	7.97682	6.27119	0.180806	5.41365		18-03-2014	30	15
2996.22	ML-05	Ol-9	75	38.8767	0.02894	16.6479	0.252566	0.201871	42.799	0.224758	99.0806		0.994699	0.000585432	0.35622	0.00519782	0.00437484	1.63247	0.00616134	3.00118	82.0877		0.21363	54.8987	0.446135	8.68365	6.80433	0.18046	5.26817		18-03-2014	30	15
2996.22	ML-05	Ol-9	80	38.8799	0.018921	16.6944	0.310223	0.225815	42.9079	0.232972	99.2992		0.993579	0.000382293	0.356783	0.00637669	0.00488782	1.63464	0.00637879	3.00391	82.0841		0.213737	84.4925	0.44577	7.16827	6.14831	0.18035	5.18158		18-03-2014	30	15
2996.22	ML-05	Ol-9	85	38.7255	0.038558	16.6523	0.312111	0.215307	42.9789	0.229832	99.1838		0.990863	0.000780022	0.356326	0.00642347	0.00466617	1.63938	0.00630064	3.00569	82.1454		0.214246	42.2148	0.445913	7.08672	6.50754	0.180203	5.24723		18-03-2014	30	15
2996.22	ML-05	Ol-9	90	38.9193	0.030826	16.5133	0.262981	0.213263	42.9921	0.270809	99.2234		0.994306	0.000622655	0.352813	0.0054041	0.00461484	1.63739	0.00741269	3.00319	82.2725		0.213594	53.0915	0.448132	8.39991	6.52283	0.180074	4.47035		18-03-2014	30	15
2996.22	ML-05	Ol-9	95	38.87	0.03916	16.4293	0.315515	0.226126	42.9983	0.237102	99.1511		0.993495	0.000791351	0.351177	0.00648657	0.00489539	1.63837	0.00649298	3.00278	82.3489		0.213805	42.6704	0.449117	6.94396	6.17646	0.179991	5.15159		18-03-2014	30	15
2996.22	ML-05	Ol-9	100	38.773	0.032738	16.5443	0.254886	0.222015	43.1164	0.231238	99.21		0.990991	0.000661558	0.353626	0.00523999	0.00480627	1.64282	0.00633224	3.00555	82.2873		0.214059	49.0722	0.447668	8.53862	6.28527	0.179767	5.19146		18-03-2014	30	15
2996.22	ML-05	Ol-14	0	39.2316	0.080787	14.2223	0.31718	0.185569	44.7813	0.259367	99.1293		0.992085	0.00161521	0.300773	0.00645153	0.0039747	1.68818	0.00702725	3.00163	84.8778		0.212909	20.356	0.484416	7.02095	7.35803	0.175088	4.73362		18-03-2014	30	15
2996.22	ML-05	Ol-14	4.47368	39.341	0.086449	13.1774	0.329015	0.18408	45.7526	0.238865	99.1432		0.990276	0.00172047	0.277394	0.00666147	0.00392467	1.71686	0.006442	3.00428	86.0904		0.212776	18.8319	0.504395	6.70477	7.27976	0.17259	5.01012		18-03-2014	30	15
2996.22	ML-05	Ol-14	8.97368	39.5771	0.060536	13.0355	0.32612	0.170738	45.6172	0.247256	99.0706		0.99563	0.00120405	0.274244	0.00659896	0.00363806	1.71077	0.00666436	2.99982	86.1843		0.211956	26.8458	0.506791	6.7998	7.80038	0.172761	4.85763		18-03-2014	30	15
2996.22	ML-05	Ol-14	13.4737	39.4414	0.073179	13.1943	0.314427	0.193233	45.8006	0.2388	99.294		0.991143	0.00145394	0.277285	0.00635547	0.00411293	1.71579	0.00642948	3.00369	86.0876		0.212502	22.4826	0.503732	6.92962	6.99378	0.172576	5.00191		18-03-2014	30	15
2996.22	ML-05	Ol-14	17.9737	39.4628	0.072859	13.0835	0.296593	0.17173	45.7953	0.226511	99.1683		0.99187	0.00144786	0.275009	0.00599614	0.00365594	1.71592	0.00609977	3.00174	86.1869		0.212331	22.9646	0.505883	7.49574	7.73503	0.172407	5.33185		18-03-2014	30	15
2996.22	ML-05	Ol-14	22.4737	39.518	0.080612	13.1501	0.337644	0.18954	45.7666	0.235451	99.3127		0.992548	0.00160078	0.276211	0.00682118	0.00403221	1.71362	0.00633599	3.00219	86.1188		0.21226	21.1335	0.504931	6.56068	7.03386	0.172569	5.05721		18-03-2014	30	15
2996.22	ML-05	Ol-14	26.9737	39.4115	0.028802	13.2161	0.335009	0.180001	45.8031	0.24725	99.2583		0.991226	0.000572727	0.277977	0.0067772	0.00383451	1.71733	0.0066626	3.00546	86.0684		0.212408	56.9145	0.503737	6.60576	7.28449	0.172446	4.9372		18-03-2014	30	15
2996.22	ML-05	Ol-14	31.4737	39.3708	0.079148	13.1035	0.318644	0.194119	45.7778	0.235617	99.1049		0.991121	0.00157532	0.275864	0.00645211	0.0041391	1.71797	0.00635502	3.00423	86.1641		0.212651	21.1298	0.505224	6.89483	7.02557	0.172469	4.98421		18-03-2014	30	15
2996.22	ML-05	Ol-14	35.9737	39.458	0.044049	13.1804	0.333591	0.200836	45.822	0.247124	99.3156		0.991651	0.000875256	0.277018	0.00674345	0.00427515	1.71675	0.00665421	3.00484	86.1058		0.212333	36.3159	0.503468	6.47119	6.7567	0.172441	4.85655		18-03-2014	30	15
2996.22	ML-05	Ol-14	40.4737	39.5102	0.062922	13.1445	0.336509	0.188386	45.8455	0.225383	99.3505		0.992035	0.0012491	0.276005	0.00679608	0.00400638	1.71602	0.00606312	3.00327	86.1445		0.212316	26.1482	0.50465	6.67105	7.03898	0.172371	5.22346		18-03-2014	30	15
2996.22	ML-05	Ol-14	44.9737	39.6558	0.10666	13.0774	0.341845	0.189886	45.8958	0.220586	99.5194		0.993232	0.00211213	0.273919	0.0068868	0.00402831	1.71366	0.00591943	3.00069	86.2185		0.211872	16.3765	0.506294	6.5532	7.07399	0.17228	5.39891		18-03-2014	30	15
2996.22	ML-05	Ol-14	49.4737	39.2345	0.090603	13.1483	0.314829	0.188429	45.8203	0.232698	99.056		0.988634	0.00180503	0.277072	0.00638096	0.00402162	1.72121	0.00628229	3.00619	86.1345		0.213077	18.878	0.505391	6.96896	7.12233	0.172454	5.06929		18-03-2014	30	15
2996.22	ML-05	Ol-12	0	39.1562	0.060284	15.8369	0.275124	0.222143	43.645	0.241733	99.4837		0.993836	0.00120974	0.336156	0.00561677	0.00477565	1.65142	0.00657367	3.00097	83.0871		0.21306	26.2121	0.457866	7.73576	6.28888	0.178265	4.9871		18-03-2014	30	15
2996.22	ML-05	Ol-12	5.44444	39.5626	0.065826	12.9001	0.335872	0.153888	45.7607	0.267727	99.091		0.994462	0.00130821	0.271177	0.0067908	0.00327638	1.71476	0.0072103	3.0003	86.3452		0.212156	23.9469	0.510052	6.63809	8.51956	0.172439	4.57507		18-03-2014	30	15
2996.22	ML-05	Ol-12	10.8444	39.6224	0.065181	12.9657	0.373164	0.162722	46.0402	0.250355	99.5124		0.992427	0.00129079	0.271587	0.00751798	0.00345215	1.71911	0.00671849	3.00307	86.3572		0.212028	25.9299	0.508722	5.85606	7.94441	0.171974	4.9003		18-03-2014	30	15
2996.22	ML-05	Ol-12	16.2444	39.6263	0.030343	12.741	0.304988	0.184998	45.9406	0.287211	99.1691		0.9946	0.000602142	0.267439	0.00615732	0.00393294	1.71898	0.00772367	3.00102	86.5366		0.211934	55.0261	0.513167	7.24437	7.32044	0.172033	4.42805		18-03-2014	30	15
2996.22	ML-05	Ol-12	21.6444	39.3554	0.060588	12.8799	0.338188	0.170566	45.5685	0.282488	98.7045		0.993511	0.00120929	0.271917	0.00686706	0.00364709	1.71491	0.00764058	3.00116	86.314		0.212674	27.525	0.510495	6.53671	7.80323	0.172822	4.40778		18-03-2014	30	15
2996.22	ML-05	Ol-12	27.0444	39.6821	0.05633	13.0071	0.334992	0.195515	45.8757	0.235191	99.4172		0.994792	0.00111649	0.272693	0.00675486	0.00415149	1.71447	0.00631708	3.00119	86.2772		0.2118	29.4953	0.507188	6.62192	6.93426	0.172276	5.19653		18-03-2014	30	15
2996.22	ML-05	Ol-12	32.4444	39.6201	0.049919	12.9357	0.291158	0.177196	45.8258	0.235563	99.1665		0.99524	0.00099141	0.271743	0.00588281	0.00377009	1.71605	0.00633982	3.00094	86.3294		0.211979	33.6342	0.509516	7.56454	7.57054	0.172307	5.10954		18-03-2014	30	15
2996.22	ML-05	Ol-12	37.8444	39.6385	0.049701	12.8795	0.284934	0.170362	45.6772	0.230567	98.958		0.997343	0.000988707	0.271008	0.00576654	0.00363066	1.71331	0.00621559	2.99907	86.3425		0.211853	32.3889	0.51001	7.71576	7.76306	0.172575	5.12857		18-03-2014	30	15
2996.22	ML-05	Ol-12	43.2444	39.6336	0.075487	12.9298	0.357802	0.185197	45.8222	0.244392	99.2859		0.994518	0.0014976	0.271329	0.00722164	0.00393612	1.71409	0.00657043	3.00027	86.3339		0.211883	21.9972	0.50937	6.11055	7.3001	0.17237	4.82845		18-03-2014	30	15
2996.22	ML-05	Ol-8	0	38.5037	0.035765	17.6515	0.25534	0.238098	41.3509	0.288171	98.3863		0.99727	0.000732393	0.382338	0.00531953	0.00522338	1.59663	0.00799684	2.99743	80.6799		0.214633	44.6021	0.433101	8.23404	5.93326	0.184492	4.42532		18-03-2014	30	15
2996.22	ML-05	Ol-8	5.51429	39.2486	0.047837	13.4386	0.305681	0.155512	45.2744	0.251705	98.7556		0.992961	0.000956857	0.284327	0.00622043	0.0033324	1.70753	0.00682272	3.00314	85.7256		0.212978	33.5109	0.499147	7.25616	8.42788	0.173744	4.88641		18-03-2014	30	15
2996.22	ML-05	Ol-8	11.0143	39.5829	0.0497	12.7445	0.372961	0.186098	45.8582	0.220422	99.0558		0.994894	0.000987645	0.267885	0.00754009	0.00396184	1.71828	0.00593583	3.0007	86.5125		0.212078	34.4081	0.512677	6.00722	7.24807	0.172156	5.43855		18-03-2014	30	15
2996.22	ML-05	Ol-8	16.5143	39.4538	0.103626	12.6821	0.365928	0.174152	45.969	0.221681	99.0201		0.991653	0.00205928	0.266574	0.00739794	0.00370754	1.72244	0.00596976	3.00128	86.5977		0.212383	16.3742	0.514394	6.17986	7.79931	0.171905	5.37835		18-03-2014	30	15
2996.22	ML-05	Ol-8	22.0143	39.6002	0.079195	12.4329	0.408048	0.185096	46.0734	0.208342	99.03		0.994168	0.00157194	0.26103	0.00823982	0.00393591	1.72433	0.00560398	3.00015	86.8523		0.212073	21.0747	0.520204	5.61883	7.07188	0.171693	5.42562		18-03-2014	30	15
2996.22	ML-05	Ol-8	27.5143	39.462	0.085991	12.262	0.405098	0.175353	46.2194	0.211547	98.8539		0.992126	0.00170929	0.257813	0.00819203	0.0037341	1.73229	0.00569839	3.00253	87.0452		0.212445	19.5802	0.523467	5.63433	7.52341	0.171304	5.55861		18-03-2014	30	15
2996.22	ML-05	Ol-8	33.0143	39.4516	0.104827	12.2277	0.411764	0.171548	46.4478	0.209417	99.0751		0.989383	0.00207849	0.256449	0.008306	0.00364394	1.7365	0.0056269	3.00348	87.1322		0.212492	16.8167	0.523796	5.6062	7.72626	0.170783	5.4874		18-03-2014	30	15
2996.22	ML-05	Ol-3 C	0	38.3996	0.0237	19.578	0.2062	0.2809	40.9356	0.2502	99.6742		0.991435	0.000483795	0.422729	0.00428223	0.00614292	1.5756	0.00692122	3.0076	78.8459		n.a.	n.a.	n.a.	n.a.	n.a.	n.a.	n.a.		26-02-2016	40	15
2996.22	ML-05	Ol-3 C	5.01	38.5963	0.0355	16.8125	0.301	0.1929	43.2247	0.2719	99.4348		0.986667	0.000717511	0.359429	0.00618921	0.00417679	1.64727	0.00744718	3.0119	82.0886		n.a.	n.a.	n.a.	n.a.	n.a.	n.a.	n.a.		26-02-2016	40	15
2996.22	ML-05	Ol-3 C	10.02	38.7124	0.0095	17.0458	0.2994	0.2331	42.9623	0.2736	99.5361		0.989577	0.000191999	0.364396	0.00615595	0.00504693	1.63718	0.00749331	3.01004	81.7945		n.a.	n.a.	n.a.	n.a.	n.a.	n.a.	n.a.		26-02-2016	40	15
2996.22	ML-05	Ol-3 C	15.03	38.819	0.0193	17.1172	0.2545	0.2174	43.2817	0.2448	99.9539		0.987933	0.000388343	0.364311	0.00520973	0.00468628	1.64209	0.00667502	3.01129	81.8425		n.a.	n.a.	n.a.	n.a.	n.a.	n.a.	n.a.		26-02-2016	40	15
2996.22	ML-05	Ol-3 C	20.05	38.6677	0.0062	17.0848	0.2845	0.2892	43.1488	0.2448	99.726		0.987059	0.00012513	0.364721	0.00584145	0.00625286	1.642	0.0066952	3.01269	81.825		n.a.	n.a.	n.a.	n.a.	n.a.	n.a.	n.a.		26-02-2016	40	15
2996.22	ML-05	Ol-3 C	25.06	38.8126	0.0245	17.0748	0.2717	0.2279	43.0726	0.2337	99.7178		0.989892	0.000494034	0.364189	0.00557376	0.00492317	1.63766	0.00638603	3.00912	81.8074		n.a.	n.a.	n.a.	n.a.	n.a.	n.a.	n.a.		26-02-2016	40	15
2996.22	ML-05	Ol-3 C	30.07	38.6913	0.0102	16.658	0.2782	0.207	42.9576	0.2692	99.0715		0.991673	0.000206695	0.357054	0.0057353	0.00449377	1.64136	0.00739244	3.00791	82.1331		n.a.	n.a.	n.a.	n.a.	n.a.	n.a.	n.a.		26-02-2016	40	15
2996.22	ML-05	Ol-3 C	35.08	38.666	0.0245	17.0779	0.2496	0.2139	43.3065	0.2755	99.8139		0.985692	0.000493803	0.364085	0.005118	0.00461858	1.64579	0.00752474	3.01332	81.8852		n.a.	n.a.	n.a.	n.a.	n.a.	n.a.	n.a.		26-02-2016	40	15
2996.22	ML-05	Ol-3 C	40.09	38.6986	0.0338	16.97	0.2532	0.235	43.0401	0.2653	99.496		0.988983	0.000682945	0.362687	0.00520477	0.00508683	1.63974	0.00726421	3.00965	81.8877		n.a.	n.a.	n.a.	n.a.	n.a.	n.a.	n.a.		26-02-2016	40	15
2996.22	ML-05	Ol-3 C	45.1	38.5509	0.0172	17.3007	0.2837	0.2506	43.1054	0.2307	99.7392		0.984958	0.000347446	0.36966	0.00583024	0.00542313	1.64181	0.00631522	3.01435	81.6224		n.a.	n.a.	n.a.	n.a.	n.a.	n.a.	n.a.		26-02-2016	40	15
2996.22	ML-05	Ol-3 C	50.11	38.5593	0.0227	16.9422	0.2952	0.2489	42.8879	0.2271	99.1833		0.988901	0.000460283	0.36337	0.00608953	0.00540673	1.63971	0.0062402	3.01018	81.8594		n.a.	n.a.	n.a.	n.a.	n.a.	n.a.	n.a.		26-02-2016	40	15
2996.22	ML-05	Ol-3 C	55.12	38.5996	0.0721	17.0508	0.303	0.2191	42.9185	0.2094	99.3725		0.988058	0.00145918	0.365006	0.00623858	0.00475037	1.63777	0.00574293	3.00902	81.775		n.a.	n.a.	n.a.	n.a.	n.a.	n.a.	n.a.		26-02-2016	40	15
2996.22	ML-05	Ol-3 C	60.13	38.6413	0.0054	16.9534	0.2781	0.1929	43.0474	0.2569	99.3754		0.988843	0.000109256	0.362818	0.00572428	0.00418113	1.64222	0.00704364	3.01094	81.9047		n.a.	n.a.	n.a.	n.a.	n.a.	n.a.	n.a.		26-02-2016	40	15
2996.22	ML-05	Ol-3 C	65.14	38.5984	0.0359	17.144	0.3322	0.2103	43.1219	0.228	99.6707		0.985952	0.000725031	0.366231	0.00682543	0.00455	1.64207	0.00623992	3.0126	81.7642		n.a.	n.a.	n.a.	n.a.	n.a.	n.a.	n.a.		26-02-2016	40	15
2996.22	ML-05	Ol-3 C	70.16	38.519	0.0178	17.1334	0.3072	0.2594	43.2936	0.2894	99.8198		0.983091	0.000359182	0.365694	0.00630643	0.00560757	1.64722	0.00791362	3.01619	81.8326		n.a.	n.a.	n.a.	n.a.	n.a.	n.a.	n.a.		26-02-2016	40	15
2996.22	ML-05	Ol-3 C	75.17	38.6668	0	17.0231	0.2731	0.2559	43.0245	0.2643	99.5077		0.988739	0	0.364031	0.00561706	0.00554242	1.64009	0.007241	3.01126	81.8359		n.a.	n.a.	n.a.	n.a.	n.a.	n.a.	n.a.		26-02-2016	40	15
2996.22	ML-05	Ol-3 C	80.18	38.6637	0.0547	17.0478	0.2973	0.2506	43.1205	0.2717	99.7063		0.986703	0.00110369	0.363837	0.0061027	0.00541689	1.6405	0.007429	3.01109	81.8475		n.a.	n.a.	n.a.	n.a.	n.a.	n.a.	n.a.		26-02-2016	40	15
2996.22	ML-05	Ol-3 C	85.19	38.6536	0.0378	17.2325	0.3108	0.2278	43.295	0.2438	100.001		0.984461	0.000761159	0.367039	0.00636698	0.00491414	1.64382	0.00665273	3.01402	81.7472		n.a.	n.a.	n.a.	n.a.	n.a.	n.a.	n.a.		26-02-2016	40	15
2996.22	ML-05	Ol-3 C	90.2	38.6937	0.0249	17.2386	0.2687	0.2874	43.0484	0.2735	99.8352		0.987144	0.000502244	0.367789	0.00551381	0.0062103	1.63722	0.00747576	3.01185	81.6565		n.a.	n.a.	n.a.	n.a.	n.a.	n.a.	n.a.		26-02-2016	40	15
2996.22	ML-05	Ol-3 C	95.21	38.5938	0.0434	16.9309	0.2966	0.256	43.0051	0.2671	99.3929		0.987675	0.000878136	0.362354	0.00610536	0.0055491	1.64068	0.00732366	3.01057	81.9098		n.a.	n.a.	n.a.	n.a.	n.a.	n.a.	n.a.		26-02-2016	40	15
2996.22	ML-05	Ol-3 C	100.22	38.6147	0.0344	17.1996	0.3122	0.2155	43.1462	0.2121	99.7347		0.985846	0.000694369	0.367224	0.00641111	0.00466004	1.64213	0.00580169	3.01277	81.7243		n.a.	n.a.	n.a.	n.a.	n.a.	n.a.	n.a.		26-02-2016	40	15
2996.22	ML-05	Ol-3 C	105.23	38.5482	0.0399	17.1516	0.3215	0.2471	43.0844	0.2372	99.6299		0.98535	0.00080637	0.366646	0.00661015	0.00534989	1.64178	0.00649619	3.01304	81.7446		n.a.	n.a.	n.a.	n.a.	n.a.	n.a.	n.a.		26-02-2016	40	15
2996.22	ML-05	Ol-3 C	110.25	38.8279	0.0405	17.0063	0.2987	0.2384	43.0388	0.2513	99.7019		0.990217	0.000816614	0.362704	0.00612725	0.00514966	1.63627	0.00686652	3.00815	81.8555		n.a.	n.a.	n.a.	n.a.	n.a.	n.a.	n.a.		26-02-2016	40	15
2996.22	ML-05	Ol-3 C	115.26	38.7001	0.0492	16.7135	0.2945	0.2087	42.9537	0.2551	99.1748		0.990945	0.000996043	0.357899	0.0060655	0.00452632	1.63963	0.00699851	3.00706	82.0829		n.a.	n.a.	n.a.	n.a.	n.a.	n.a.	n.a.		26-02-2016	40	15
2996.22	ML-05	Ol-3 C	120.27	38.5434	0.0626	16.9469	0.2346	0.1999	42.9773	0.2401	99.2048		0.98771	0.00126832	0.363183	0.00483561	0.00433888	1.64183	0.00659218	3.00975	81.8862		n.a.	n.a.	n.a.	n.a.	n.a.	n.a.	n.a.		26-02-2016	40	15
2996.22	ML-05	Ol-3 C	125.28	38.6635	0.0176	16.9232	0.293	0.2629	42.9702	0.2578	99.3882		0.989378	0.000356081	0.362159	0.00603077	0.0056982	1.63922	0.00706808	3.00991	81.9045		n.a.	n.a.	n.a.	n.a.	n.a.	n.a.	n.a.		26-02-2016	40	15
2996.22	ML-05	Ol-3 C	130.29	38.6535	0.0322	16.9135	0.2439	0.1736	43.0188	0.2374	99.2729		0.989489	0.000651709	0.362086	0.00502202	0.00376407	1.64168	0.0065112	3.00921	81.9297		n.a.	n.a.	n.a.	n.a.	n.a.	n.a.	n.a.		26-02-2016	40	15
2996.22	ML-05	Ol-3 C	135.3	38.7668	0.0289	17.219	0.2837	0.2366	43.194	0.2512	99.9802		0.987111	0.000581808	0.366665	0.00581044	0.00510278	1.6396	0.00685304	3.01173	81.724		n.a.	n.a.	n.a.	n.a.	n.a.	n.a.	n.a.		26-02-2016	40	15
2996.22	ML-05	Ol-3 C	140.31	38.6292	0.0132	17.171	0.305	0.2681	42.8731	0.2382	99.4978		0.988649	0.000267101	0.367517	0.00627871	0.00581178	1.63576	0.00653169	3.01082	81.6542		n.a.	n.a.	n.a.	n.a.	n.a.	n.a.	n.a.		26-02-2016	40	15
2996.22	ML-05	Ol-3 C	145.32	38.7081	0	16.9187	0.2945	0.2086	43.1962	0.2727	99.5988		0.988295	0	0.36125	0.00604803	0.00451113	1.64414	0.00745981	3.0117	81.9861		n.a.	n.a.	n.a.	n.a.	n.a.	n.a.	n.a.		26-02-2016	40	15
2996.22	ML-05	Ol-3 C	150.34	38.7171	0.0802	17.1156	0.2616	0.2366	42.9564	0.2661	99.6336		0.98849	0.0016189	0.365441	0.00537219	0.00511646	1.63495	0.007279	3.00827	81.7316		n.a.	n.a.	n.a.	n.a.	n.a.	n.a.	n.a.		26-02-2016	40	15
2996.22	ML-05	Ol-3 C	155.35	38.596	0.0442	16.926	0.3129	0.2559	43.0883	0.2438	99.4671		0.987009	0.000893669	0.361984	0.00643618	0.00554287	1.64266	0.00667991	3.0112	81.9427		n.a.	n.a.	n.a.	n.a.	n.a.	n.a.	n.a.		26-02-2016	40	15
2996.22	ML-05	Ol-3 C	160.36	38.5234	0.0205	17.2419	0.29	0.2715	43.0645	0.2697	99.6815		0.984839	0.000414352	0.368622	0.00596324	0.0058789	1.64123	0.00738719	3.01433	81.6592		n.a.	n.a.	n.a.	n.a.	n.a.	n.a.	n.a.		26-02-2016	40	15
2996.22	ML-05	Ol-3 C	165.37	38.6318	0.0247	17.1115	0.2388	0.1823	43.0547	0.2001	99.4439		0.988167	0.000499526	0.366041	0.00491319	0.00394964	1.64178	0.00548391	3.01083	81.7692		n.a.	n.a.	n.a.	n.a.	n.a.	n.a.	n.a.		26-02-2016	40	15
2996.22	ML-05	Ol-3 C	170.38	38.7288	0.0339	17.2322	0.2886	0.2155	43.1489	0.2251	99.873		0.987163	0.000683172	0.367326	0.00591691	0.00465252	1.63958	0.00614735	3.01147	81.6969		n.a.	n.a.	n.a.	n.a.	n.a.	n.a.	n.a.		26-02-2016	40	15
2996.22	ML-05	Ol-3 C	175.39	38.5888	0.0316	17.1453	0.2994	0.2085	43.1846	0.2438	99.702		0.985366	0.000637968	0.366132	0.00614939	0.0045095	1.64389	0.00667003	3.01336	81.7847		n.a.	n.a.	n.a.	n.a.	n.a.	n.a.	n.a.		26-02-2016	40	15
2996.22	ML-05	Ol-3 C	180.4	38.7539	0.0359	17.2107	0.293	0.2401	43.1605	0.2224	99.9165		0.987326	0.000723128	0.366691	0.00600422	0.00518111	1.63923	0.00607069	3.01123	81.7196		n.a.	n.a.	n.a.	n.a.	n.a.	n.a.	n.a.		26-02-2016	40	15
2996.22	ML-05	Ol-3 C	185.41	38.5792	0.0182	17.0884	0.3008	0.2191	42.9655	0.2708	99.442		0.987555	0.000368345	0.365818	0.00619341	0.00475047	1.6396	0.00742702	3.01171	81.7585		n.a.	n.a.	n.a.	n.a.	n.a.	n.a.	n.a.		26-02-2016	40	15
2996.22	ML-05	Ol-13 B	0	39.4002	0.0609	14.2371	0.3407	0.175	46.143	0.2725	100.629		0.982833	0.00120109	0.297001	0.00683592	0.00369747	1.71591	0.00728292	3.01477	85.2452		n.a.	n.a.	n.a.	n.a.	n.a.	n.a.	n.a.		26-02-2016	40	15
2996.22	ML-05	Ol-13 B	5	39.5513	0.0492	14.0605	0.304	0.1773	46.5756	0.2541	100.972		0.982165	0.000965971	0.291998	0.00607213	0.00372922	1.72421	0.00676061	3.0159	85.5175		n.a.	n.a.	n.a.	n.a.	n.a.	n.a.	n.a.		26-02-2016	40	15
2996.22	ML-05	Ol-13 B	9.99	39.5949	0.0311	14.0096	0.2931	0.2242	46.414	0.2547	100.822		0.984517	0.000611392	0.291317	0.00586197	0.00472177	1.72045	0.00678532	3.01426	85.5193		n.a.	n.a.	n.a.	n.a.	n.a.	n.a.	n.a.		26-02-2016	40	15
2996.22	ML-05	Ol-13 B	14.99	39.6307	0.0195	14.0797	0.3534	0.2265	46.1601	0.2648	100.735		0.986722	0.00038386	0.293165	0.0070774	0.00477658	1.71332	0.00706381	3.01251	85.3891		n.a.	n.a.	n.a.	n.a.	n.a.	n.a.	n.a.		26-02-2016	40	15
2996.22	ML-05	Ol-13 B	19.98	39.5868	0.0665	14.0595	0.3365	0.1977	46.3935	0.2531	100.894		0.983767	0.00130659	0.292191	0.00672621	0.00416135	1.71873	0.00673894	3.01362	85.4698		n.a.	n.a.	n.a.	n.a.	n.a.	n.a.	n.a.		26-02-2016	40	15
2996.22	ML-05	Ol-13 B	24.98	39.3835	0.0405	14.5816	0.3374	0.1674	46.0888	0.2559	100.855		0.981812	0.00079826	0.304001	0.00676555	0.00353472	1.71284	0.00683505	3.01659	84.9269		n.a.	n.a.	n.a.	n.a.	n.a.	n.a.	n.a.		26-02-2016	40	15
2996.22	ML-05	Ol-13 B	29.97	39.3654	0.0423	14.5801	0.329	0.2002	45.9396	0.2565	100.713		0.982794	0.000834956	0.304414	0.00660674	0.00423348	1.70979	0.00686108	3.01554	84.8867		n.a.	n.a.	n.a.	n.a.	n.a.	n.a.	n.a.		26-02-2016	40	15
2996.22	ML-05	Ol-13 B	34.97	39.4777	0.0399	14.6527	0.3658	0.2085	46.169	0.2612	101.175		0.981534	0.000784335	0.304668	0.00731545	0.00439082	1.71125	0.006958	3.0169	84.8868		n.a.	n.a.	n.a.	n.a.	n.a.	n.a.	n.a.		26-02-2016	40	15
2996.22	ML-05	Ol-13 B	39.96	39.2998	0.0831	15.0113	0.3367	0.1636	45.7329	0.2509	100.878		0.981234	0.00164043	0.313442	0.00676191	0.0034598	1.70224	0.00671182	3.01548	84.4498		n.a.	n.a.	n.a.	n.a.	n.a.	n.a.	n.a.		26-02-2016	40	15
2996.22	ML-05	Ol-13 B	44.96	39.3744	0.0305	14.8227	0.3008	0.1931	45.9548	0.2622	100.939		0.981836	0.000601312	0.309107	0.00603319	0.00407843	1.7083	0.00700512	3.01696	84.678		n.a.	n.a.	n.a.	n.a.	n.a.	n.a.	n.a.		26-02-2016	40	15
2996.22	ML-05	Ol-13 B	49.95	39.4498	0.018	14.839	0.3508	0.2297	45.6676	0.2488	100.804		0.985169	0.000355397	0.309903	0.00704643	0.00485861	1.70013	0.00665693	3.01412	84.5822		n.a.	n.a.	n.a.	n.a.	n.a.	n.a.	n.a.		26-02-2016	40	15
2996.22	ML-05	Ol-13 B	54.95	39.9348	0.0214	14.9427	0.3652	0.2515	46.1373	0.2649	101.918		0.986123	0.0004178	0.308578	0.00725361	0.00526021	1.6984	0.0070084	3.01304	84.6248		n.a.	n.a.	n.a.	n.a.	n.a.	n.a.	n.a.		26-02-2016	40	15
2996.22	ML-05	Ol-13 B	59.94	39.5247	0.0493	14.9566	0.3495	0.2316	45.3837	0.2407	100.736		0.987711	0.000974055	0.312572	0.0070251	0.00490214	1.69071	0.00644459	3.01034	84.397		n.a.	n.a.	n.a.	n.a.	n.a.	n.a.	n.a.		26-02-2016	40	15
2996.22	ML-05	Ol-13 B	64.94	39.1791	0.055	15.1416	0.3549	0.2363	45.3659	0.2478	100.581		0.982349	0.00109031	0.317497	0.0071575	0.00501835	1.6957	0.00665687	3.01547	84.2292		n.a.	n.a.	n.a.	n.a.	n.a.	n.a.	n.a.		26-02-2016	40	15
2996.22	ML-05	Ol-13 B	69.93	39.1693	0.0269	15.2792	0.2975	0.2472	45.1524	0.2595	100.432		0.984039	0.000534311	0.321013	0.0060117	0.00526018	1.69105	0.00698492	3.01489	84.0455		n.a.	n.a.	n.a.	n.a.	n.a.	n.a.	n.a.		26-02-2016	40	15
2996.22	ML-05	Ol-13 B	74.93	39.1167	0.0597	15.087	0.3437	0.2292	45.5129	0.2567	100.606		0.98045	0.00118308	0.316244	0.00692926	0.00486591	1.70062	0.00689361	3.01718	84.32		n.a.	n.a.	n.a.	n.a.	n.a.	n.a.	n.a.		26-02-2016	40	15
2996.22	ML-05	Ol-13 B	79.92	39.1602	0.0506	15.4333	0.3904	0.2315	45.2794	0.2635	100.809		0.98121	0.0010024	0.323394	0.00786812	0.00491308	1.69132	0.00707385	3.01678	83.9484		n.a.	n.a.	n.a.	n.a.	n.a.	n.a.	n.a.		26-02-2016	40	15
2996.22	ML-05	Ol-13 B	84.92	39.6938	0.0471	15.5557	0.3579	0.1825	45.4668	0.2715	101.575		0.986047	0.000925063	0.323162	0.00715123	0.00383993	1.68375	0.00722607	3.0121	83.8976		n.a.	n.a.	n.a.	n.a.	n.a.	n.a.	n.a.		26-02-2016	40	15
2996.22	ML-05	Ol-13 B	89.91	39.3255	0.037	15.3158	0.3755	0.222	45.137	0.2596	100.672		0.985577	0.000733151	0.321005	0.00756955	0.00471254	1.68639	0.00697074	3.01296	84.0089		n.a.	n.a.	n.a.	n.a.	n.a.	n.a.	n.a.		26-02-2016	40	15
2996.22	ML-05	Ol-13 B	94.91	39.3293	0.0273	15.3384	0.3723	0.2024	45.2103	0.2468	100.727		0.985179	0.000540676	0.321318	0.00750129	0.00429433	1.68828	0.00662372	3.01374	84.0108		n.a.	n.a.	n.a.	n.a.	n.a.	n.a.	n.a.		26-02-2016	40	15
2996.22	ML-05	Ol-13 B	99.9	39.0197	0.0382	15.5494	0.3316	0.1723	45.135	0.2619	100.508		0.980933	0.000759266	0.326908	0.00670523	0.00366882	1.69152	0.00705421	3.01755	83.8039		n.a.	n.a.	n.a.	n.a.	n.a.	n.a.	n.a.		26-02-2016	40	15
2996.22	ML-05	Ol-13 B	104.9	39.0894	0.0331	15.4087	0.317	0.265	44.993	0.2569	100.363		0.983554	0.00065848	0.324236	0.00641568	0.00564769	1.68769	0.00692566	3.01513	83.8843		n.a.	n.a.	n.a.	n.a.	n.a.	n.a.	n.a.		26-02-2016	40	15
2996.22	ML-05	Ol-13 B	109.89	39.2946	0.0586	15.7611	0.3693	0.2203	45.106	0.2564	101.066		0.98292	0.00115893	0.329707	0.00743033	0.00466751	1.68201	0.00687165	3.01476	83.6107		n.a.	n.a.	n.a.	n.a.	n.a.	n.a.	n.a.		26-02-2016	40	15
2996.22	ML-05	Ol-13 B	114.89	39.1944	0.0164	15.6761	0.3477	0.1795	44.869	0.2369	100.52		0.985329	0.000325969	0.329573	0.00703081	0.00382215	1.68156	0.00638087	3.01402	83.6126		n.a.	n.a.	n.a.	n.a.	n.a.	n.a.	n.a.		26-02-2016	40	15
2996.22	ML-05	Ol-11 B	0	39.3214	0.034	15.604	0.2972	0.2268	44.6995	0.273	100.456		0.988392	0.000675701	0.328014	0.00600887	0.00482868	1.67499	0.00735225	3.01026	83.6239		n.a.	n.a.	n.a.	n.a.	n.a.	n.a.	n.a.		26-02-2016	40	15
2996.22	ML-05	Ol-11 B	4.99	40.3793	0.0413	15.2219	0.2998	0.1719	46.0898	0.2823	102.486		0.990997	0.000801381	0.31242	0.00591819	0.00357335	1.68627	0.00742304	3.0074	84.3688		n.a.	n.a.	n.a.	n.a.	n.a.	n.a.	n.a.		26-02-2016	40	15
2996.22	ML-05	Ol-11 B	9.99	39.6644	0.0171	14.3553	0.3532	0.1847	46.1416	0.2752	100.991		0.986087	0.000336114	0.298458	0.00706284	0.00388926	1.71008	0.00733028	3.01324	85.1405		n.a.	n.a.	n.a.	n.a.	n.a.	n.a.	n.a.		26-02-2016	40	15
2996.22	ML-05	Ol-11 B	14.98	39.5623	0.0476	14.314	0.3467	0.2005	45.9401	0.2796	100.691		0.986332	0.000938261	0.298441	0.00695247	0.00423391	1.70743	0.00746855	3.01179	85.1216		n.a.	n.a.	n.a.	n.a.	n.a.	n.a.	n.a.		26-02-2016	40	15
2996.22	ML-05	Ol-11 B	19.98	39.6629	0.0385	14.3038	0.3027	0.2041	45.9535	0.2609	100.726		0.987986	0.000758232	0.297971	0.00606488	0.00430621	1.70645	0.00696302	3.0105	85.1343		n.a.	n.a.	n.a.	n.a.	n.a.	n.a.	n.a.		26-02-2016	40	15
2996.22	ML-05	Ol-11 B	24.97	39.8274	0.0641	14.6324	0.2759	0.2171	46.356	0.265	101.638		0.984369	0.00125259	0.302446	0.00548494	0.00454487	1.70801	0.00701745	3.01313	84.9564		n.a.	n.a.	n.a.	n.a.	n.a.	n.a.	n.a.		26-02-2016	40	15
2996.22	ML-05	Ol-11 B	29.96	39.7502	0.0314	14.9845	0.3549	0.1866	46.4566	0.2622	102.026		0.980963	0.000612658	0.309251	0.00704471	0.00390041	1.70911	0.00693272	3.01781	84.6781		n.a.	n.a.	n.a.	n.a.	n.a.	n.a.	n.a.		26-02-2016	40	15
2996.22	ML-05	Ol-11 B	34.96	39.5209	0.0383	14.4084	0.3521	0.193	45.881	0.2679	100.662		0.98609	0.000755551	0.30065	0.00706642	0.0040788	1.7066	0.00716176	3.0124	85.0218		n.a.	n.a.	n.a.	n.a.	n.a.	n.a.	n.a.		26-02-2016	40	15
2996.22	ML-05	Ol-11 B	39.95	39.2352	0.0319	14.4619	0.3325	0.2322	45.9891	0.2504	100.533		0.981299	0.0006308	0.302487	0.006689	0.00491896	1.7147	0.00670992	3.01744	85.0045		n.a.	n.a.	n.a.	n.a.	n.a.	n.a.	n.a.		26-02-2016	40	15
2996.22	ML-05	Ol-11 B	44.94	39.3137	0.0301	14.6882	0.3534	0.2295	46.0282	0.2598	100.903		0.980658	0.000593629	0.306407	0.00709061	0.00484888	1.71161	0.00694337	3.01816	84.8165		n.a.	n.a.	n.a.	n.a.	n.a.	n.a.	n.a.		26-02-2016	40	15
2996.22	ML-05	Ol-11 B	49.94	39.5355	0.0635	14.8136	0.3309	0.1633	45.9234	0.2562	101.086		0.983777	0.00124928	0.308266	0.00662293	0.00344176	1.70354	0.0068304	3.01372	84.6771		n.a.	n.a.	n.a.	n.a.	n.a.	n.a.	n.a.		26-02-2016	40	15
2996.22	ML-05	Ol-11 B	54.93	39.397	0.0506	14.6595	0.3074	0.224	45.7919	0.2645	100.695		0.983948	0.00099916	0.306185	0.00617528	0.00473852	1.70493	0.0070777	3.01405	84.7753		n.a.	n.a.	n.a.	n.a.	n.a.	n.a.	n.a.		26-02-2016	40	15
2996.22	ML-05	Ol-11 B	59.93	39.4217	0.0464	14.7727	0.2936	0.2519	45.7941	0.2649	100.845		0.983642	0.000915367	0.30826	0.00589253	0.00532372	1.70341	0.00708176	3.01453	84.6764		n.a.	n.a.	n.a.	n.a.	n.a.	n.a.	n.a.		26-02-2016	40	15
2996.22	ML-05	Ol-11 B	64.92	39.4238	0.0313	15.0892	0.3753	0.2536	46.0254	0.2517	101.45		0.979838	0.000615057	0.31363	0.00750271	0.00533864	1.7053	0.0067025	3.01893	84.4656		n.a.	n.a.	n.a.	n.a.	n.a.	n.a.	n.a.		26-02-2016	40	15
2996.22	ML-05	Ol-11 B	69.91	39.4164	0.0406	15.1859	0.3381	0.2426	45.7	0.2663	101.19		0.982221	0.000799896	0.316467	0.00677675	0.00512046	1.69768	0.00710986	3.01618	84.2878		n.a.	n.a.	n.a.	n.a.	n.a.	n.a.	n.a.		26-02-2016	40	15
2996.22	ML-05	Ol-11 B	74.91	39.6604	0.0514	14.6936	0.3292	0.2136	45.8363	0.2728	101.057		0.986578	0.00101091	0.305674	0.00658685	0.00450051	1.69978	0.0072707	3.0114	84.7579		n.a.	n.a.	n.a.	n.a.	n.a.	n.a.	n.a.		26-02-2016	40	15
2996.22	ML-05	Ol-11 B	79.91	39.4426	0.0489	15.3208	0.3247	0.1505	45.8047	0.2487	101.341		0.981447	0.000962023	0.318815	0.00649872	0.00317193	1.6991	0.00663032	3.01663	84.2008		n.a.	n.a.	n.a.	n.a.	n.a.	n.a.	n.a.		26-02-2016	40	15
2996.22	ML-05	Ol-11 B	84.9	39.4671	0.0367	14.9675	0.3365	0.1452	45.5499	0.2655	100.768		0.985934	0.00072486	0.312693	0.00676148	0.00307231	1.69632	0.00710616	3.01262	84.4355		n.a.	n.a.	n.a.	n.a.	n.a.	n.a.	n.a.		26-02-2016	40	15
2996.22	ML-05	Ol-11 B	89.89	39.3066	0.0544	14.6839	0.3404	0.2368	45.524	0.2895	100.436		0.984682	0.00107747	0.30763	0.00685905	0.00502456	1.70012	0.00777028	3.01316	84.6779		n.a.	n.a.	n.a.	n.a.	n.a.	n.a.	n.a.		26-02-2016	40	15
2996.22	ML-05	Ol-11 B	94.89	39.5319	0.0509	14.9194	0.3328	0.204	45.6041	0.2733	100.916		0.985958	0.0010037	0.311185	0.00667633	0.0043095	1.6956	0.00730311	3.01203	84.4934		n.a.	n.a.	n.a.	n.a.	n.a.	n.a.	n.a.		26-02-2016	40	15
2996.22	ML-05	Ol-11 B	99.88	39.235	0.0497	14.9647	0.3523	0.1672	45.5948	0.2796	100.643		0.982113	0.000983603	0.313265	0.00709324	0.00354495	1.70142	0.00749864	3.01592	84.4509		n.a.	n.a.	n.a.	n.a.	n.a.	n.a.	n.a.		26-02-2016	40	15
2996.22	ML-05	Ol-11 B	104.87	39.2733	0.0481	15.181	0.3145	0.206	45.7635	0.2508	101.037		0.980147	0.000949106	0.316848	0.00631333	0.00435459	1.70264	0.00670624	3.01795	84.3105		n.a.	n.a.	n.a.	n.a.	n.a.	n.a.	n.a.		26-02-2016	40	15
2996.22	ML-05	Ol-11 B	109.87	39.3756	0.0601	15.0481	0.3475	0.2092	45.5865	0.2675	100.894		0.983282	0.00118659	0.31426	0.00697991	0.00442485	1.69705	0.00715702	3.01434	84.3754		n.a.	n.a.	n.a.	n.a.	n.a.	n.a.	n.a.		26-02-2016	40	15
2996.22	ML-05	Ol-11 B	114.86	39.3149	0.0637	15.3919	0.3521	0.2759	45.5296	0.2757	101.204		0.980794	0.00125642	0.321121	0.0070653	0.00582986	1.69326	0.00736911	3.01669	84.0586		n.a.	n.a.	n.a.	n.a.	n.a.	n.a.	n.a.		26-02-2016	40	15
2996.22	ML-05	Ol-11 B	119.85	39.1945	0.0487	15.1775	0.2949	0.2328	45.4095	0.2651	100.623		0.982254	0.000964946	0.318094	0.00594453	0.0049416	1.6965	0.00711813	3.01582	84.2105		n.a.	n.a.	n.a.	n.a.	n.a.	n.a.	n.a.		26-02-2016	40	15
2996.22	ML-05	Ol-11 B	124.85	39.3724	0.0547	15.4436	0.3181	0.2416	45.1827	0.2751	100.888		0.984915	0.00108186	0.323081	0.00640051	0.00511905	1.68495	0.00737318	3.01292	83.9106		n.a.	n.a.	n.a.	n.a.	n.a.	n.a.	n.a.		26-02-2016	40	15
2996.22	ML-05	Ol-11 B	129.84	39.6232	0.0454	15.1201	0.3175	0.2079	45.356	0.264	100.934		0.988552	0.000895532	0.315472	0.00637144	0.00439329	1.68692	0.00705686	3.00966	84.2452		n.a.	n.a.	n.a.	n.a.	n.a.	n.a.	n.a.		26-02-2016	40	15
2996.22	ML-05	Ol-11 B	134.83	39.1887	0.0593	15.2625	0.3594	0.209	45.1707	0.266	100.516		0.983579	0.00117673	0.320354	0.00725555	0.00444304	1.69011	0.00715299	3.01407	84.0656		n.a.	n.a.	n.a.	n.a.	n.a.	n.a.	n.a.		26-02-2016	40	15
2996.22	ML-05	Ol-11 B	139.83	39.3678	0.0578	15.4834	0.2972	0.2573	45.5112	0.2526	101.227		0.981769	0.00113965	0.322917	0.00596158	0.00543493	1.69198	0.00674931	3.01595	83.9735		n.a.	n.a.	n.a.	n.a.	n.a.	n.a.	n.a.		26-02-2016	40	15
2996.22	ML-05	Ol-11 B	144.82	39.1544	0.0459	15.6025	0.3012	0.1832	45.4185	0.272	100.978		0.979699	0.00090803	0.326484	0.00606193	0.00388261	1.69416	0.00729187	3.01848	83.8425		n.a.	n.a.	n.a.	n.a.	n.a.	n.a.	n.a.		26-02-2016	40	15
2996.22	ML-05	Ol-11 B	149.82	39.4933	0.0489	15.6507	0.3712	0.2018	45.3761	0.2708	101.413		0.98367	0.000962965	0.325999	0.00743666	0.00425729	1.68485	0.00722657	3.0144	83.788		n.a.	n.a.	n.a.	n.a.	n.a.	n.a.	n.a.		26-02-2016	40	15
2996.22	ML-05	Ol-11 B	154.82	39.1737	0.0737	15.5098	0.2958	0.272	45.3537	0.2985	100.977		0.98	0.00145772	0.324484	0.00595215	0.0057635	1.69143	0.0080008	3.01708	83.9038		n.a.	n.a.	n.a.	n.a.	n.a.	n.a.	n.a.		26-02-2016	40	15
2996.22	ML-05	Ol-9 B	0	38.2455	0.0609	17.0432	0.3033	0.2016	43.6764	0.2652	99.7961		0.976283	0.0012291	0.363833	0.00622747	0.00435885	1.66207	0.00725315	3.02126	82.041		n.a.	n.a.	n.a.	n.a.	n.a.	n.a.	n.a.		26-02-2016	40	15
2996.22	ML-05	Ol-9 B	5.01	38.6463	0.0217	16.884	0.299	0.2702	43.6046	0.2497	99.9755		0.983335	0.000436545	0.359273	0.0061194	0.00582324	1.654	0.00680722	3.01579	82.1547		n.a.	n.a.	n.a.	n.a.	n.a.	n.a.	n.a.		26-02-2016	40	15
2996.22	ML-05	Ol-9 B	10.02	38.4537	0.0329	17.0338	0.307	0.1844	43.7796	0.2552	100.047		0.978639	0.000661997	0.362537	0.00628444	0.00397494	1.66098	0.00695861	3.02004	82.0838		n.a.	n.a.	n.a.	n.a.	n.a.	n.a.	n.a.		26-02-2016	40	15
2996.22	ML-05	Ol-9 B	15.02	38.658	0.0191	17.146	0.319	0.2369	43.9667	0.2624	100.608		0.978791	0.000382349	0.363053	0.00649659	0.00508044	1.65952	0.00711823	3.02044	82.05		n.a.	n.a.	n.a.	n.a.	n.a.	n.a.	n.a.		26-02-2016	40	15
2996.22	ML-05	Ol-9 B	20.03	38.8352	0.0018	17.2614	0.2634	0.214	43.9335	0.2437	100.753		0.981562	3.597e-05	0.364858	0.0053549	0.00458133	1.65537	0.00659941	3.01837	81.9398		n.a.	n.a.	n.a.	n.a.	n.a.	n.a.	n.a.		26-02-2016	40	15
2996.22	ML-05	Ol-9 B	25.04	38.4592	0.0496	16.7432	0.2779	0.2479	43.6826	0.2638	99.7242		0.980635	0.000999917	0.357027	0.00569954	0.00535389	1.66044	0.00720675	3.01737	82.3032		n.a.	n.a.	n.a.	n.a.	n.a.	n.a.	n.a.		26-02-2016	40	15
2996.22	ML-05	Ol-9 B	30.05	38.7468	0.0324	16.8778	0.2489	0.2619	43.8479	0.2284	100.244		0.982681	0.000649677	0.357972	0.00507745	0.00562598	1.65781	0.00620627	3.01602	82.2415		n.a.	n.a.	n.a.	n.a.	n.a.	n.a.	n.a.		26-02-2016	40	15
2996.22	ML-05	Ol-9 B	35.05	38.5297	0.0664	17.0687	0.2891	0.2677	43.8896	0.2339	100.345		0.977724	0.00133218	0.362224	0.00590083	0.0057538	1.66032	0.00635929	3.01961	82.0906		n.a.	n.a.	n.a.	n.a.	n.a.	n.a.	n.a.		26-02-2016	40	15
2996.22	ML-05	Ol-9 B	40.06	38.8173	0.0276	17.2203	0.2929	0.2716	44.013	0.2589	100.902		0.979881	0.000550849	0.363534	0.00594718	0.00580716	1.65629	0.00700225	3.01902	82.0017		n.a.	n.a.	n.a.	n.a.	n.a.	n.a.	n.a.		26-02-2016	40	15
2996.22	ML-05	Ol-9 B	45.07	39.1169	0.0477	17.5039	0.3276	0.2288	44.3758	0.2473	101.848		0.978771	0.000943649	0.366275	0.00659332	0.00484907	1.65528	0.00662977	3.01934	81.8815		n.a.	n.a.	n.a.	n.a.	n.a.	n.a.	n.a.		26-02-2016	40	15
2996.22	ML-05	Ol-9 B	50.08	38.6087	0.0658	17.0646	0.3524	0.2513	43.9815	0.2357	100.56		0.977688	0.0013174	0.361383	0.00717786	0.00539006	1.66033	0.00639488	3.01968	82.1249		n.a.	n.a.	n.a.	n.a.	n.a.	n.a.	n.a.		26-02-2016	40	15
2996.22	ML-05	Ol-9 B	55.08	38.7234	0.0499	16.986	0.3156	0.1903	43.7339	0.2422	100.241		0.982567	0.00100107	0.360442	0.00644124	0.00408991	1.6543	0.00658447	3.01543	82.1098		n.a.	n.a.	n.a.	n.a.	n.a.	n.a.	n.a.		26-02-2016	40	15
2996.22	ML-05	Ol-9 B	60.09	38.6644	0.0419	17.1818	0.3076	0.2309	43.8447	0.2417	100.513		0.979707	0.00083941	0.364091	0.00626924	0.00495558	1.65619	0.00656174	3.01861	81.9782		n.a.	n.a.	n.a.	n.a.	n.a.	n.a.	n.a.		26-02-2016	40	15
2996.22	ML-05	Ol-9 B	65.1	38.8693	0.0593	17.2974	0.2732	0.2389	43.9717	0.2597	100.969		0.980331	0.00118249	0.36484	0.00554231	0.0051035	1.65329	0.00701772	3.0173	81.9218		n.a.	n.a.	n.a.	n.a.	n.a.	n.a.	n.a.		26-02-2016	40	15
2996.22	ML-05	Ol-9 B	70.11	38.9937	0.0329	17.4851	0.2679	0.2351	44.2728	0.2374	101.525		0.978775	0.000652919	0.367039	0.00540885	0.00499835	1.65666	0.0063845	3.01992	81.863		n.a.	n.a.	n.a.	n.a.	n.a.	n.a.	n.a.		26-02-2016	40	15
2996.22	ML-05	Ol-9 B	75.11	38.8482	0.0677	17.1776	0.2587	0.262	43.8131	0.2347	100.662		0.982139	0.00135321	0.363179	0.00526068	0.00561034	1.65126	0.0063573	3.01515	81.9712		n.a.	n.a.	n.a.	n.a.	n.a.	n.a.	n.a.		26-02-2016	40	15
2996.22	ML-05	Ol-9 B	80.12	38.5761	0.0646	17.1336	0.332	0.2294	43.5732	0.2361	100.145		0.980921	0.00129874	0.364351	0.00679044	0.00494077	1.65175	0.00643234	3.01648	81.9279		n.a.	n.a.	n.a.	n.a.	n.a.	n.a.	n.a.		26-02-2016	40	15
2996.22	ML-05	Ol-9 B	85.13	38.5409	0.0748	17.259	0.2897	0.2944	43.7261	0.2386	100.424		0.978096	0.00150085	0.366295	0.0059136	0.00632825	1.65428	0.00648766	3.0189	81.8717		n.a.	n.a.	n.a.	n.a.	n.a.	n.a.	n.a.		26-02-2016	40	15
2996.22	ML-05	Ol-9 B	90.14	38.7802	0.0343	17.3807	0.3475	0.2472	43.9605	0.2604	101.011		0.978806	0.000684473	0.366868	0.00705481	0.00528471	1.65408	0.00704183	3.01982	81.8468		n.a.	n.a.	n.a.	n.a.	n.a.	n.a.	n.a.		26-02-2016	40	15
2996.22	ML-05	Ol-9 B	95.15	38.7247	0.0201	17.3045	0.245	0.2252	43.8015	0.2357	100.557		0.980952	0.00040256	0.366585	0.00499194	0.00483185	1.65408	0.00639701	3.01824	81.8582		n.a.	n.a.	n.a.	n.a.	n.a.	n.a.	n.a.		26-02-2016	40	15
2996.22	ML-05	Ol-9 B	100.15	38.8199	0.0262	17.1831	0.3301	0.2568	43.9411	0.2465	100.804		0.980766	0.000523344	0.363052	0.00670811	0.0054953	1.65497	0.00667245	3.01819	82.0095		n.a.	n.a.	n.a.	n.a.	n.a.	n.a.	n.a.		26-02-2016	40	15
2996.22	ML-05	Ol-9 B	105.16	38.7592	0.0545	17.1296	0.3495	0.2642	43.9291	0.2465	100.733		0.97982	0.00108929	0.362139	0.00710661	0.00565705	1.65551	0.00667646	3.018	82.0515		n.a.	n.a.	n.a.	n.a.	n.a.	n.a.	n.a.		26-02-2016	40	15
2996.22	ML-05	Ol-9 B	110.17	38.7744	0.0318	17.1588	0.2675	0.2383	43.9269	0.2516	100.649		0.98073	0.000635926	0.36295	0.00544217	0.00510522	1.65632	0.00681824	3.018	82.0256		n.a.	n.a.	n.a.	n.a.	n.a.	n.a.	n.a.		26-02-2016	40	15
2996.22	ML-05	Ol-9 B	115.18	38.9734	0.0463	17.0296	0.3411	0.2539	43.8708	0.2554	100.77		0.98379	0.000924039	0.359496	0.00692564	0.00542853	1.65089	0.00690737	3.01436	82.118		n.a.	n.a.	n.a.	n.a.	n.a.	n.a.	n.a.		26-02-2016	40	15
2996.22	ML-05	Ol-9 B	120.18	38.7796	0.0278	17.0603	0.3097	0.2144	44.0285	0.2473	100.668		0.980371	0.000555658	0.360686	0.00629756	0.0045909	1.65932	0.00669837	3.01852	82.1443		n.a.	n.a.	n.a.	n.a.	n.a.	n.a.	n.a.		26-02-2016	40	15
2996.22	ML-05	Ol-9 B	125.19	39.4165	0.0177	16.9834	0.3016	0.2124	44.3318	0.2514	101.515		0.986288	0.000350166	0.355391	0.00607017	0.00450159	1.65367	0.00673982	3.01301	82.3106		n.a.	n.a.	n.a.	n.a.	n.a.	n.a.	n.a.		26-02-2016	40	15
2996.22	ML-05	Ol-9 B	130.2	38.8566	0.065	17.1	0.2819	0.2494	43.8707	0.2554	100.679		0.981969	0.00129874	0.361397	0.00573023	0.00533845	1.65278	0.00691531	3.01543	82.0574		n.a.	n.a.	n.a.	n.a.	n.a.	n.a.	n.a.		26-02-2016	40	15
2996.22	ML-05	Ol-9 B	135.21	38.96	0.0352	17.1123	0.273	0.288	44.2743	0.2496	101.192		0.979832	0.000699924	0.359912	0.00552254	0.00613495	1.65994	0.00672566	3.01877	82.1813		n.a.	n.a.	n.a.	n.a.	n.a.	n.a.	n.a.		26-02-2016	40	15
2996.22	ML-05	Ol-9 B	140.21	38.9649	0.0435	16.9417	0.361	0.2385	44.0221	0.2599	100.832		0.982731	0.000867412	0.357334	0.00732339	0.00509489	1.65516	0.00702304	3.01553	82.2442		n.a.	n.a.	n.a.	n.a.	n.a.	n.a.	n.a.		26-02-2016	40	15
2996.22	ML-05	Ol-9 B	145.22	39.0506	0.0456	17.1556	0.3096	0.2025	43.8495	0.2534	100.867		0.984773	0.000909178	0.361802	0.00627991	0.00432533	1.64847	0.00684657	3.01341	82.0024		n.a.	n.a.	n.a.	n.a.	n.a.	n.a.	n.a.		26-02-2016	40	15
2996.22	ML-05	Ol-9 B	150.23	38.8497	0.0399	17.397	0.3267	0.2299	44.1105	0.2334	101.187		0.978528	0.000794573	0.366451	0.00661879	0.00490467	1.65629	0.0062986	3.01988	81.8834		n.a.	n.a.	n.a.	n.a.	n.a.	n.a.	n.a.		26-02-2016	40	15
2996.22	ML-05	Ol-9 B	155.24	38.9751	0.0717	16.9226	0.3341	0.2572	43.9326	0.2591	100.752		0.983414	0.00143036	0.357086	0.00678062	0.00549675	1.65251	0.00700446	3.01372	82.231		n.a.	n.a.	n.a.	n.a.	n.a.	n.a.	n.a.		26-02-2016	40	15
2996.22	ML-05	Ol-9 B	160.24	38.857	0.0423	17.1657	0.3891	0.2179	43.8474	0.231	100.75		0.981976	0.000845176	0.362785	0.00790927	0.00466417	1.6519	0.00625462	3.01633	81.993		n.a.	n.a.	n.a.	n.a.	n.a.	n.a.	n.a.		26-02-2016	40	15
2996.22	ML-05	Ol-9 B	165.25	38.7839	0.0701	17.3743	0.2668	0.192	43.7131	0.2465	100.647		0.981429	0.00140249	0.36768	0.00543046	0.00411523	1.64903	0.00668316	3.01577	81.7683		n.a.	n.a.	n.a.	n.a.	n.a.	n.a.	n.a.		26-02-2016	40	15
2996.22	ML-05	Ol-9 B	170.26	38.9317	0.0626	17.0915	0.3126	0.3017	43.6485	0.2424	100.591		0.98473	0.00125188	0.361535	0.00635985	0.00646361	1.64586	0.00656908	3.01277	81.9898		n.a.	n.a.	n.a.	n.a.	n.a.	n.a.	n.a.		26-02-2016	40	15
2996.22	ML-05	Ol-9 B	175.27	38.9105	0.0367	17.1488	0.3273	0.2129	44.093	0.2451	100.974		0.980806	0.000731405	0.361498	0.006636	0.00454546	1.65689	0.00661938	3.01773	82.0898		n.a.	n.a.	n.a.	n.a.	n.a.	n.a.	n.a.		26-02-2016	40	15
2996.22	ML-05	Ol-9 B	180.28	39.0012	0.0168	16.9451	0.2863	0.2281	43.9932	0.2653	100.736		0.98423	0.0003352	0.357618	0.00581144	0.00487562	1.65506	0.00717321	3.0151	82.2317		n.a.	n.a.	n.a.	n.a.	n.a.	n.a.	n.a.		26-02-2016	40	15
2996.22	ML-05	Ol-9 B	185.28	38.7822	0.0308	16.8566	0.306	0.2217	43.8507	0.2371	100.285		0.983114	0.000617302	0.357353	0.00623931	0.00476017	1.65713	0.00643962	3.01565	82.2608		n.a.	n.a.	n.a.	n.a.	n.a.	n.a.	n.a.		26-02-2016	40	15
2996.22	ML-05	Ol-9 B	190.29	38.6788	0.045	17.0252	0.261	0.2518	43.8996	0.2387	100.4		0.980295	0.00090172	0.360854	0.00532069	0.00540537	1.65864	0.00648177	3.0179	82.1315		n.a.	n.a.	n.a.	n.a.	n.a.	n.a.	n.a.		26-02-2016	40	15
2996.22	ML-05	Ol-9 B	195.3	38.7594	0.0159	17.07	0.3535	0.2163	44.0106	0.2239	100.65		0.980328	0.000317956	0.361064	0.00719163	0.00463379	1.65943	0.00606745	3.01904	82.13		n.a.	n.a.	n.a.	n.a.	n.a.	n.a.	n.a.		26-02-2016	40	15
2996.22	ML-05	Ol-9 B	200.31	39.1666	0.0533	17.3451	0.3473	0.2215	44.3953	0.2562	101.785		0.979842	0.00105425	0.362888	0.00698858	0.00469353	1.65572	0.00686716	3.01805	82.0228		n.a.	n.a.	n.a.	n.a.	n.a.	n.a.	n.a.		26-02-2016	40	15
2996.22	ML-05	Ol-9 B	205.31	38.9629	0.0468	17.3223	0.3512	0.2308	43.9064	0.2468	101.067		0.98193	0.000932504	0.365082	0.00711914	0.00492664	1.64955	0.00666395	3.01621	81.8785		n.a.	n.a.	n.a.	n.a.	n.a.	n.a.	n.a.		26-02-2016	40	15
2996.22	ML-05	Ol-9 B	210.32	39.1997	0.0242	17.2382	0.3204	0.2571	43.9122	0.2562	101.208		0.985626	0.000481083	0.362474	0.00647986	0.00547542	1.64597	0.00690186	3.01341	81.9525		n.a.	n.a.	n.a.	n.a.	n.a.	n.a.	n.a.		26-02-2016	40	15
2996.22	ML-05	Ol-9 B	215.33	38.8302	0.0464	17.0003	0.3037	0.2649	43.6848	0.2352	100.365		0.98409	0.000929734	0.360311	0.0061909	0.00568634	1.65046	0.00638646	3.01405	82.0809		n.a.	n.a.	n.a.	n.a.	n.a.	n.a.	n.a.		26-02-2016	40	15
2996.22	ML-05	Ol-9 B	220.34	38.6693	0.0626	17.1205	0.3585	0.2775	43.8008	0.2567	100.546		0.979591	0.0012538	0.362703	0.00730485	0.00595425	1.65413	0.00696726	3.0179	82.0162		n.a.	n.a.	n.a.	n.a.	n.a.	n.a.	n.a.		26-02-2016	40	15
2996.22	ML-05	Ol-9 B	225.35	39.1701	0.0633	16.9847	0.2616	0.283	43.8892	0.254	100.906		0.986372	0.00126027	0.357684	0.00529868	0.00603613	1.6476	0.00685295	3.01111	82.1629		n.a.	n.a.	n.a.	n.a.	n.a.	n.a.	n.a.		26-02-2016	40	15
2996.22	ML-05	Ol-9 B	230.35	39.1941	0.011	17.274	0.3704	0.2008	44.0896	0.2373	101.377		0.984098	0.000218366	0.362716	0.00748053	0.00427039	1.6503	0.00638371	3.01547	81.9815		n.a.	n.a.	n.a.	n.a.	n.a.	n.a.	n.a.		26-02-2016	40	15
2996.22	ML-05	Ol-9 B	235.36	38.8897	0.068	17.1313	0.2893	0.2069	43.9768	0.2504	100.812		0.981427	0.00135678	0.361551	0.0058724	0.00442252	1.65446	0.00677042	3.01586	82.066		n.a.	n.a.	n.a.	n.a.	n.a.	n.a.	n.a.		26-02-2016	40	15
2996.22	ML-05	Ol-9 B	240.37	38.9997	0.0195	16.7579	0.2836	0.2001	43.6212	0.2613	100.143		0.988795	0.000390891	0.355321	0.00578356	0.00429713	1.64874	0.0070981	3.01042	82.2699		n.a.	n.a.	n.a.	n.a.	n.a.	n.a.	n.a.		26-02-2016	40	15
2996.22	ML-05	Ol-9 B	245.38	38.7682	0.0263	16.9917	0.3748	0.1979	44.0626	0.2483	100.67		0.980042	0.000525654	0.359221	0.00762101	0.00423741	1.66053	0.00672517	3.01891	82.2146		n.a.	n.a.	n.a.	n.a.	n.a.	n.a.	n.a.		26-02-2016	40	15
2996.22	ML-05	Ol-9 B	250.38	38.9246	0.0324	17.2392	0.3279	0.2201	43.876	0.2631	100.883		0.982425	0.00064654	0.363872	0.00665672	0.00470523	1.65086	0.00711465	3.01628	81.9395		n.a.	n.a.	n.a.	n.a.	n.a.	n.a.	n.a.		26-02-2016	40	15
2996.22	ML-05	Ol-9 B	255.39	38.7303	0.0575	17.2174	0.3272	0.2898	43.712	0.2419	100.576		0.980963	0.00115145	0.364691	0.0066659	0.00621707	1.65048	0.0065644	3.01673	81.9027		n.a.	n.a.	n.a.	n.a.	n.a.	n.a.	n.a.		26-02-2016	40	15
2996.22	ML-05	Ol-9 B	260.4	39.1722	0.0382	17.236	0.2954	0.2659	44.2805	0.2452	101.533		0.981842	0.000757012	0.36129	0.0059555	0.00564505	1.65457	0.00658479	3.01664	82.0776		n.a.	n.a.	n.a.	n.a.	n.a.	n.a.	n.a.		26-02-2016	40	15
2996.22	ML-05	Ol-9 B	265.41	38.8244	0.0653	17.3026	0.3121	0.2415	43.7833	0.2405	100.77		0.981297	0.00130492	0.365732	0.00634503	0.0051701	1.64973	0.00651281	3.01609	81.8537		n.a.	n.a.	n.a.	n.a.	n.a.	n.a.	n.a.		26-02-2016	40	15
2996.22	ML-05	Ol-9 B	270.41	38.9885	0.0542	17.1987	0.2993	0.2348	43.8642	0.2453	100.885		0.983427	0.00108089	0.362792	0.00607234	0.00501637	1.64939	0.0066292	3.01441	81.9703		n.a.	n.a.	n.a.	n.a.	n.a.	n.a.	n.a.		26-02-2016	40	15
2996.22	ML-05	Ol-9 B	275.42	38.8173	0.0948	17.1317	0.2535	0.2343	43.8434	0.2379	100.613		0.98145	0.00189508	0.362242	0.00515543	0.00501766	1.65255	0.00644459	3.01476	82.0209		n.a.	n.a.	n.a.	n.a.	n.a.	n.a.	n.a.		26-02-2016	40	15
2996.22	ML-05	Ol-9 B	280.43	38.9326	0.0675	17.2887	0.2651	0.2124	43.7566	0.2368	100.76		0.983387	0.001348	0.365199	0.00538598	0.00454414	1.64764	0.00640841	3.01392	81.8566		n.a.	n.a.	n.a.	n.a.	n.a.	n.a.	n.a.		26-02-2016	40	15
2996.22	ML-05	Ol-9 B	285.44	38.9602	0.0498	17.0949	0.327	0.2622	43.8327	0.2645	100.791		0.983549	0.000993984	0.360909	0.00663997	0.00560652	1.64961	0.00715415	3.01446	82.049		n.a.	n.a.	n.a.	n.a.	n.a.	n.a.	n.a.		26-02-2016	40	15
2996.22	ML-05	Ol-9 B	290.45	39.1272	0.0569	17.1321	0.3004	0.2284	43.8902	0.2385	100.974		0.985341	0.00113291	0.360806	0.00608487	0.0048718	1.64772	0.00643508	3.01239	82.0363		n.a.	n.a.	n.a.	n.a.	n.a.	n.a.	n.a.		26-02-2016	40	15
2996.22	ML-05	Ol-9 B	295.45	39.0231	0.0463	16.9633	0.3734	0.2801	44.1205	0.2404	101.047		0.982266	0.000921433	0.357087	0.00756006	0.00597181	1.6556	0.00648335	3.01589	82.2582		n.a.	n.a.	n.a.	n.a.	n.a.	n.a.	n.a.		26-02-2016	40	15
2996.22	ML-05	Ol-9 B	300.46	39.148	0.0487	17.122	0.304	0.2376	44.1208	0.2513	101.232		0.9835	0.000967318	0.359729	0.00614303	0.00505588	1.65241	0.00676418	3.01457	82.122		n.a.	n.a.	n.a.	n.a.	n.a.	n.a.	n.a.		26-02-2016	40	15
2996.22	ML-05	Ol-9 B	305.47	39.0051	0.0665	17.3226	0.3112	0.2859	43.9543	0.2455	101.191		0.981658	0.00132323	0.364593	0.00629974	0.00609451	1.64911	0.00661985	3.0157	81.8944		n.a.	n.a.	n.a.	n.a.	n.a.	n.a.	n.a.		26-02-2016	40	15
2996.22	ML-05	Ol-9 B	310.48	38.8523	0.0571	17.0123	0.2705	0.2183	43.7382	0.233	100.382		0.984084	0.00114348	0.360358	0.00551095	0.00468333	1.65152	0.00632309	3.01363	82.0885		n.a.	n.a.	n.a.	n.a.	n.a.	n.a.	n.a.		26-02-2016	40	15
2996.22	ML-05	Ol-9 B	315.48	39.0843	0.0368	17.3472	0.3275	0.2526	43.9853	0.229	101.263		0.982897	0.000731693	0.364831	0.00662462	0.00538053	1.649	0.0061702	3.01564	81.8838		n.a.	n.a.	n.a.	n.a.	n.a.	n.a.	n.a.		26-02-2016	40	15
2996.22	ML-05	Ol-9 B	320.49	38.7982	0.0721	17.1744	0.2771	0.257	43.9225	0.2545	100.756		0.980239	0.00144023	0.362876	0.0056312	0.0054997	1.65431	0.00688915	3.01688	82.0108		n.a.	n.a.	n.a.	n.a.	n.a.	n.a.	n.a.		26-02-2016	40	15
2996.22	ML-05	Ol-9 B	325.5	38.7726	0.0321	17.1046	0.3516	0.2197	43.7147	0.2408	100.436		0.982699	0.000643244	0.362547	0.00716784	0.00471641	1.6517	0.00653898	3.01601	82.0009		n.a.	n.a.	n.a.	n.a.	n.a.	n.a.	n.a.		26-02-2016	40	15
2996.22	ML-05	Ol-9 B	330.51	38.9043	0.0717	17.1333	0.3315	0.2353	43.9015	0.2406	100.818		0.981951	0.00143083	0.361651	0.00673007	0.00503037	1.65189	0.00650647	3.01519	82.039		n.a.	n.a.	n.a.	n.a.	n.a.	n.a.	n.a.		26-02-2016	40	15
2996.22	ML-05	Ol-9 B	335.51	38.7332	0.0214	17.2125	0.3582	0.2179	43.9459	0.2511	100.74		0.979556	0.000427893	0.364037	0.00728644	0.00466755	1.65681	0.00680378	3.01959	81.9859		n.a.	n.a.	n.a.	n.a.	n.a.	n.a.	n.a.		26-02-2016	40	15
2735.61	ML-49	Ol-9	0	39.5692	0.0381	17.3295	0.2139	0.2428	43.4293	0.2894	101.112		0.994502	0.000757092	0.364243	0.00432417	0.00516871	1.6272	0.00779299	3.00398	81.7096		0.26	51.21	0.55	8.62	9.58	0.26	2.08		26-04-2013	30	15
2735.61	ML-49	Ol-9	8.98659	39.8481	0.0293	16.5016	0.2086	0.2182	44.027	0.2574	101.09		0.997275	0.000579763	0.345374	0.00419919	0.00462538	1.64261	0.00690198	3.00157	82.627		0.25	65.07	0.57	9.15	10.49	0.26	2.24		26-04-2013	30	15
2735.61	ML-49	Ol-9	17.9666	40.107	0.0672	14.6744	0.2943	0.2388	45.2024	0.2461	100.83		0.998096	0.0013222	0.3054	0.00589096	0.00503352	1.67696	0.00656177	2.99926	84.5941		0.25	29.69	0.6	6.59	9.27	0.25	2.33		26-04-2013	30	15
2735.61	ML-49	Ol-9	26.9466	40.2664	0.0457	13.8275	0.3078	0.1871	45.81	0.2412	100.686		0.999406	0.000896791	0.287011	0.00614486	0.00393332	1.69499	0.00641408	2.9988	85.5192		0.25	42.58	0.62	6.39	12.09	0.25	2.37		26-04-2013	30	15
2735.61	ML-49	Ol-9	35.9266	40.117	0.0539	13.9131	0.3155	0.2031	45.9295	0.2516	100.784		0.99569	0.00105769	0.288786	0.00629853	0.00426964	1.6994	0.00669058	3.00219	85.4749		0.25	36.56	0.62	6.27	11.03	0.25	2.27		26-04-2013	30	15
2735.61	ML-49	Ol-9	44.9066	40.356	0.0334	14.17	0.3264	0.205	45.9694	0.2445	101.305		0.997251	0.000652556	0.292835	0.00648769	0.00429077	1.69345	0.0064734	3.00144	85.2572		0.25	58.31	0.61	6.01	10.93	0.25	2.34		26-04-2013	30	15
2735.61	ML-49	Ol-9	53.8866	40.1568	0.0515	14.17	0.3299	0.1994	45.7502	0.2449	100.903		0.996538	0.00101045	0.294077	0.00658507	0.00419126	1.69253	0.00651149	3.00144	85.197		0.25	3.77	0.62	6.08	11.98	0.26	0.85		26-04-2013	30	15
2735.61	ML-49	Ol-9	62.8666	40.0572	0.067	14.0654	0.334	0.1677	45.82	0.247	100.758		0.995099	0.00131594	0.292208	0.00667384	0.00352861	1.69687	0.00657415	3.00227	85.3094		0.25	40.03	0.61	5.9	11.2	0.25	2.32		26-04-2013	30	15
2735.61	ML-49	Ol-9	71.8466	40.2664	0.0409	14.2843	0.3491	0.2025	45.7502	0.2452	101.139		0.997351	0.000800948	0.295882	0.00695503	0.00424831	1.6893	0.00650704	3.00105	85.0955		0.25	30.19	0.61	5.83	12.89	0.25	2.3		26-04-2013	30	15
2735.61	ML-49	Ol-9	80.8266	40.2365	0.0471	14.3509	0.3303	0.2258	45.8399	0.2466	101.277		0.995684	0.000921504	0.296986	0.00657436	0.00473272	1.69104	0.0065381	3.00247	85.0613		0.25	49.57	0.61	5.62	10.95	0.25	2.34		26-04-2013	30	15
2735.61	ML-49	Ol-9	89.8066	40.127	0.0315	14.3699	0.2868	0.2042	45.6207	0.2508	100.891		0.996769	0.000618649	0.298516	0.00573035	0.00429635	1.68939	0.00667488	3.00199	84.9834		0.25	42.08	0.61	6.01	10.05	0.25	2.32		26-04-2013	30	15
2735.61	ML-49	Ol-9	98.7866	40.2764	0.0535	14.3794	0.3426	0.217	45.6108	0.2462	101.126		0.998033	0.00104815	0.297983	0.00682851	0.00455449	1.68489	0.00653643	2.99987	84.9721		0.25	61.93	0.61	6.85	11.05	0.25	2.28		26-04-2013	30	15
2735.61	ML-49	Ol-9	107.767	40.2465	0.0375	14.408	0.3309	0.1786	45.7204	0.2501	101.172		0.996973	0.00073445	0.298479	0.0065932	0.00374734	1.68839	0.00663784	3.00156	84.9774		0.25	36.84	0.61	5.83	10.32	0.25	2.33		26-04-2013	30	15
2735.61	ML-49	Ol-9	116.747	40.2166	0.0689	14.5031	0.3523	0.2186	45.5012	0.2471	101.108		0.997372	0.00135097	0.300794	0.00702763	0.00459185	1.68222	0.00656572	2.99993	84.8315		0.25	54.16	0.61	6	12.66	0.25	2.29		26-04-2013	30	15
2735.61	ML-49	Ol-9	125.727	40.3062	0.0536	14.5127	0.3236	0.2353	45.6407	0.2524	101.324		0.997397	0.00104866	0.30033	0.00644092	0.00493178	1.68367	0.0066918	3.00051	84.8624		0.25	29.73	0.6	5.61	10.49	0.25	2.31		26-04-2013	30	15
2735.61	ML-49	Ol-9	134.707	39.5792	0.0573	14.5031	0.3283	0.2366	45.6705	0.2387	100.614		0.988076	0.00113098	0.30279	0.00659232	0.00500293	1.69968	0.0063846	3.00966	84.8792		0.25	36.11	0.6	6.07	9.86	0.25	2.26		26-04-2013	30	15
2735.61	ML-49	Ol-9	143.687	40.0572	0.0636	14.5698	0.3548	0.2209	45.5311	0.2502	101.048		0.9948	0.00124878	0.302596	0.00708733	0.00464661	1.68567	0.00665733	3.0027	84.7809		0.26	35.56	0.6	6.04	9.46	0.25	2.39		26-04-2013	30	15
2735.61	ML-49	Ol-9	152.667	40.1568	0.0167	14.5793	0.317	0.238	45.3618	0.2498	100.919		0.998345	0.000328256	0.303119	0.00633905	0.00501169	1.6812	0.00665382	3.001	84.7243		0.25	30.69	0.6	5.64	10.33	0.25	2.29		26-04-2013	30	15
2735.61	ML-49	Ol-9	161.647	39.9875	0.0684	14.5222	0.311	0.1891	45.4315	0.2296	100.739		0.995545	0.00134638	0.302359	0.00622789	0.00398762	1.68617	0.00612443	3.00176	84.7948		0.25	120.27	0.6	6.22	9.35	0.25	2.29		26-04-2013	30	15
2735.61	ML-49	Ol-9	170.627	40.0672	0.0412	14.5888	0.3331	0.2026	45.4315	0.2514	100.916		0.996269	0.000809954	0.303363	0.00666202	0.0042669	1.68404	0.00669747	3.00211	84.7357		0.25	29.08	0.6	6.31	12.03	0.25	2.46		26-04-2013	30	15
2735.61	ML-49	Ol-9	179.607	40.0572	0.0595	14.5317	0.3368	0.2017	45.5112	0.2444	100.942		0.995469	0.00116907	0.302008	0.00673229	0.00424559	1.68606	0.00650737	3.00219	84.809		0.25	48.34	0.6	5.9	10.98	0.25	2.28		26-04-2013	30	15
2735.61	ML-49	Ol-9	188.587	40.2465	0.0467	14.6935	0.3128	0.1608	45.6407	0.2495	101.35		0.996285	0.000914004	0.304184	0.00622826	0.00337153	1.68429	0.00661735	3.00189	84.7026		0.25	34.29	0.6	5.89	11.2	0.25	2.32		26-04-2013	30	15
2735.61	ML-49	Ol-9	197.567	40.117	0.0664	14.5602	0.3316	0.1808	45.292	0.2448	100.793		0.998122	0.00130617	0.302956	0.00663611	0.00381013	1.67991	0.00652566	2.99927	84.7213		0.25	43.3	0.6	6.29	13.82	0.25	2.28		26-04-2013	30	15
2735.61	ML-49	Ol-9	206.547	40.376	0.0422	14.6078	0.3517	0.2206	45.561	0.2447	101.404		0.998658	0.000825243	0.302159	0.00699697	0.00462152	1.67995	0.00648464	2.99969	84.7557		0.25	31.09	0.6	6	12.37	0.25	2.34		26-04-2013	30	15
2735.61	ML-49	Ol-9	215.527	40.2465	0.0416	14.6459	0.328	0.2286	45.4215	0.2517	101.164		0.998179	0.000815735	0.303775	0.00654332	0.00480222	1.67939	0.00668839	3.00019	84.6823		0.25	45.34	0.6	5.71	10.11	0.25	2.35		26-04-2013	30	15
2735.61	ML-49	Ol-9	224.507	40.1768	0.0505	14.5127	0.3068	0.1833	45.3916	0.2363	100.858		0.998593	0.000992386	0.301659	0.00613356	0.00385889	1.68189	0.00629267	2.99942	84.792		0.25	48.81	0.6	5.99	9.96	0.25	2.28		26-04-2013	30	15
2735.61	ML-49	Ol-9	233.487	40.0672	0.0183	14.5222	0.3415	0.2179	45.9694	0.248	101.384		0.991904	0.000358185	0.300655	0.0068001	0.00456903	1.69652	0.00657794	3.00738	84.946		0.25	38.72	0.6	6.38	12.21	0.25	2.41		26-04-2013	30	15
2735.61	ML-49	Ol-9	242.467	40.0672	0.0674	14.4746	0.3302	0.2038	45.7204	0.2538	101.117		0.993807	0.00132175	0.300244	0.0065877	0.00428157	1.69056	0.0067447	3.00355	84.9185		0.25	104.85	0.6	5.78	10.45	0.25	2.3		26-04-2013	30	15
2735.61	ML-49	Ol-9	251.447	40.127	0.0026	14.3033	0.3313	0.1948	45.4614	0.2496	100.67		0.998849	5.11697e-05	0.297752	0.00663329	0.00410713	1.687	0.00665681	3.00105	84.998		0.25	28.89	0.61	5.98	11.48	0.25	2.26		26-04-2013	30	15
2735.61	ML-49	Ol-9	260.427	40.1469	0.0403	14.3318	0.3346	0.2063	45.5311	0.2427	100.834		0.997718	0.000791838	0.297861	0.00668845	0.00434251	1.68683	0.00646224	3.0007	84.9921		0.25	735.37	0.61	5.96	11.41	0.25	2.27		26-04-2013	30	15
2735.61	ML-49	Ol-9	269.407	40.2465	0.0535	14.2843	0.3328	0.2197	45.5311	0.244	100.912		0.998939	0.00104988	0.2965	0.00664414	0.00461878	1.68472	0.00648872	2.99896	85.0345		0.25	47.71	0.61	5.96	11.29	0.25	2.34		26-04-2013	30	15
2735.61	ML-49	Ol-9	278.387	40.2963	0.0561	14.3889	0.3474	0.2104	45.6705	0.2431	101.213		0.997674	0.00109815	0.297926	0.00691827	0.0044122	1.68565	0.00644861	3.00013	84.9804		0.25	38.56	0.61	5.98	10.61	0.25	2.35		26-04-2013	30	15
2735.61	ML-49	Ol-9	287.367	40.0473	0.0366	14.1796	0.3135	0.1988	45.5709	0.249	100.596		0.997054	0.000720448	0.295233	0.00627809	0.00419226	1.69138	0.00664206	3.0015	85.1389		0.25	36.3	0.61	5.7	10.71	0.25	2.36		26-04-2013	30	15
2735.61	ML-49	Ol-9	296.347	39.9875	0.039	14.0844	0.3063	0.2003	45.7303	0.2375	100.585		0.995397	0.000767559	0.293202	0.00613286	0.00422317	1.69701	0.00633422	3.00307	85.2678		0.25	54.27	0.61	6.32	11.2	0.25	2.29		26-04-2013	30	15
2735.61	ML-49	Ol-9	305.327	40.0274	0.0392	14.0654	0.338	0.2119	45.9196	0.2423	100.844		0.993996	0.000769643	0.292102	0.00675131	0.00445702	1.69994	0.00644672	3.00446	85.3366		0.25	50.08	0.61	6.38	11.05	0.25	2.39		26-04-2013	30	15
2735.61	ML-49	Ol-9	314.307	40.0672	0.0582	14.0939	0.2934	0.1808	45.7204	0.237	100.651		0.996323	0.00114422	0.293089	0.00586834	0.00380799	1.69484	0.00631418	3.00139	85.2566		0.25	50.61	0.61	5.86	10.72	0.25	2.35		26-04-2013	30	15
2735.61	ML-49	Ol-9	323.287	40.1369	0.0503	14.0083	0.3284	0.1655	45.7702	0.249	100.709		0.997118	0.000987975	0.291034	0.0065622	0.00348246	1.69509	0.00662765	3.00091	85.3467		0.25	34.76	0.61	6.65	12.19	0.25	2.4		26-04-2013	30	15
2735.61	ML-49	Ol-9	332.267	40.0274	0.0332	13.8179	0.3258	0.2181	45.9395	0.2478	100.61		0.995171	0.000652611	0.287303	0.00651532	0.00459285	1.70269	0.00660085	3.00352	85.5626		0.25	39.59	0.62	5.98	13.59	0.25	2.29		26-04-2013	30	15
2735.61	ML-49	Ol-9	341.247	39.9377	0.0534	14.3509	0.3295	0.1888	45.8299	0.2479	100.938		0.992145	0.00104884	0.298144	0.00658402	0.00397264	1.69726	0.00659821	3.00576	85.0585		0.25	61.63	0.62	6.01	10.37	0.25	2.31		26-04-2013	30	15
2735.61	ML-49	Ol-9	350.227	39.6589	0.0348	15.883	0.2329	0.2307	44.4155	0.2611	100.717		0.994215	0.000689755	0.332989	0.00469628	0.00489862	1.6599	0.00701301	3.00441	83.2912		0.25	36.87	0.61	5.98	11.8	0.25	2.31		26-04-2013	30	15
2735.61	ML-49	Ol-9	359.207	39.4298	0.0332	16.9298	0.2297	0.2218	43.6784	0.2724	100.795		0.992724	0.000660872	0.356462	0.00465167	0.00472989	1.63938	0.00734799	3.00595	82.1398		0.26	56.6	0.58	8.13	10.23	0.26	2.22		26-04-2013	30	15
2735.61	ML-49	Ol-11	0	39.9018	0.0602	18.6205	0.1793	0.2641	42.2673	0.2928	101.668		1.00095	0.00119397	0.390634	0.00361782	0.00561147	1.58065	0.00786957	2.99217	80.1837
2735.61	ML-49	Ol-11	7.86305	39.9018	0.0562	17.8209	0.1925	0.2458	42.9305	0.2542	101.455		0.999743	0.00111329	0.373408	0.00387946	0.00521632	1.60351	0.00682385	2.99489	81.1116
2735.61	ML-49	Ol-11	15.7231	39.993	0.0318	16.3617	0.2362	0.2413	44.2269	0.253	101.467		0.995027	0.000625537	0.340435	0.00472688	0.00508503	1.64038	0.00674417	2.99495	82.8134
2735.61	ML-49	Ol-11	23.5831	40.2668	0.0498	14.7625	0.2958	0.2176	45.2117	0.2333	101.094		0.998864	0.000976706	0.306249	0.00590202	0.00457197	1.67193	0.00620057	2.996	84.5186
2735.61	ML-49	Ol-11	31.4431	40.4088	0.0745	13.773	0.3231	0.1584	45.9554	0.2476	100.979		0.998914	0.00145608	0.284733	0.00642441	0.0033166	1.69355	0.00655784	2.99604	85.6071
2735.61	ML-49	Ol-11	39.3031	40.3885	0.0533	13.6331	0.3255	0.1832	46.086	0.2499	100.994		0.997759	0.00104105	0.281655	0.0064679	0.00383336	1.69725	0.00661442	2.99622	85.7671
2735.61	ML-49	Ol-11	47.1631	40.571	0.0442	13.863	0.2987	0.2143	45.7644	0.2502	101.08		1.00163	0.000862758	0.286222	0.00593158	0.00448125	1.68433	0.00661815	2.99174	85.475
2735.61	ML-49	Ol-11	55.0231	40.4493	0.0539	13.8729	0.3094	0.2173	45.8649	0.2569	101.072		0.999509	0.00105303	0.286682	0.0061495	0.004548	1.68952	0.00680138	2.99561	85.4933
2735.61	ML-49	Ol-11	62.8831	40.5507	0.0443	13.9729	0.3397	0.2092	45.674	0.2563	101.11		1.00181	0.000865296	0.288688	0.00675033	0.00437757	1.68214	0.00678409	2.9928	85.352
2735.61	ML-49	Ol-11	70.7431	40.6319	0.0431	14.1528	0.3108	0.2404	45.8448	0.2597	101.55		1.00026	0.000838879	0.29137	0.0061542	0.00501264	1.68246	0.00684977	2.99434	85.2383
2735.61	ML-49	Ol-11	78.6031	40.571	0.045	14.0828	0.3374	0.2299	45.5835	0.2448	101.149		1.00228	0.000878945	0.290951	0.00670444	0.00481059	1.67877	0.00647952	2.99199	85.2288
2735.61	ML-49	Ol-11	86.4631	40.4291	0.051	14.3227	0.3309	0.2189	45.6941	0.2534	101.368		0.99797	0.000995335	0.295669	0.00656999	0.00457673	1.68148	0.00670175	2.99528	85.0457
2735.61	ML-49	Ol-11	94.3231	40.4392	0.0671	14.1828	0.3316	0.2119	45.684	0.2609	101.227		0.999341	0.00131102	0.293109	0.00659128	0.00443535	1.683	0.00690785	2.99577	85.1674
2735.61	ML-49	Ol-11	102.183	40.3074	0.0358	14.2028	0.3219	0.1916	45.5232	0.2536	100.904		0.999188	0.000701651	0.294437	0.00641841	0.00402294	1.6823	0.00673549	2.99562	85.1049
2735.61	ML-49	Ol-11	110.043	40.3986	0.0477	14.3927	0.3329	0.2267	45.5534	0.2553	101.269		0.998865	0.000932468	0.297603	0.0066206	0.00474763	1.67907	0.00676314	2.99625	84.9442
2735.61	ML-49	Ol-11	117.903	40.5609	0.0441	14.3527	0.3108	0.2048	45.5936	0.2505	101.368		1.00116	0.000860619	0.296269	0.00617052	0.00428166	1.67768	0.00662464	2.99425	84.991
2735.61	ML-49	Ol-11	125.763	40.4798	0.0406	14.2028	0.331	0.2716	45.6036	0.2641	101.228		1.00068	0.000793525	0.293622	0.00658159	0.00568689	1.68061	0.00699496	2.99593	85.1273
2735.61	ML-49	Ol-11	133.623	40.5913	0.0441	14.3427	0.3264	0.2238	45.4931	0.2561	101.354		1.00183	0.000860544	0.296037	0.00647967	0.00467848	1.67384	0.00677214	2.99215	84.9718
2735.61	ML-49	Ol-11	141.483	40.5507	0.0477	14.4527	0.3238	0.2167	45.6237	0.2586	101.527		0.999978	0.000930005	0.298054	0.00642262	0.00452623	1.67722	0.00683247	2.99527	84.9108
2735.61	ML-49	Ol-11	149.343	40.5507	0.0714	14.3527	0.3408	0.2107	45.5031	0.2538	101.349		1.00087	0.00139332	0.296256	0.00676584	0.00440482	1.67428	0.00671162	2.99221	84.9657
2735.61	ML-49	Ol-11	157.203	40.3378	0.0515	14.3227	0.3316	0.1895	45.6539	0.2537	101.192		0.997803	0.0010072	0.296288	0.00659768	0.00397034	1.68352	0.00672374	2.99726	85.0345
2735.61	ML-49	Ol-11	165.063	40.3074	0.0359	14.2628	0.3666	0.1974	45.4328	0.2577	100.909		0.999784	0.00070403	0.295856	0.00731405	0.00414719	1.67996	0.00684847	2.99589	85.0261
2735.61	ML-49	Ol-11	172.923	40.3479	0.0572	14.3227	0.3331	0.1956	45.483	0.2505	101.035		0.999524	0.00112032	0.296724	0.00663728	0.00410418	1.67969	0.00664871	2.99537	84.9868
2735.61	ML-49	Ol-11	180.783	40.5203	0.0549	14.4227	0.3513	0.2121	45.5835	0.2537	101.434		1.00021	0.00107144	0.297729	0.00697496	0.00443451	1.6774	0.00670962	2.99525	84.9261
2735.61	ML-49	Ol-11	188.643	40.713	0.0738	14.1928	0.3154	0.2229	45.7142	0.2562	101.54		1.00214	0.00143624	0.292158	0.00624453	0.00464718	1.67746	0.00675664	2.99217	85.1668
2735.61	ML-49	Ol-11	196.503	40.5609	0.0491	14.3627	0.3505	0.1974	45.5735	0.2605	101.406		1.00092	0.000957959	0.296403	0.006957	0.00412594	1.67653	0.0068874	2.99402	84.9765
2735.61	ML-49	Ol-11	204.363	40.5609	0.0581	14.3227	0.3138	0.2388	45.6338	0.2493	101.441		1.00018	0.00113272	0.295361	0.00622399	0.00498761	1.67752	0.00658646	2.99336	85.0289
2735.61	ML-49	Ol-11	212.223	40.6319	0.0413	14.3327	0.3262	0.1715	45.7443	0.2603	101.606		0.999754	0.000803437	0.294925	0.00645586	0.00357418	1.67792	0.00686212	2.99173	85.0508
2735.61	ML-49	Ol-11	220.083	40.6116	0.0201	14.2827	0.362	0.2772	45.7142	0.2629	101.632		0.999435	0.000391089	0.293949	0.00716567	0.00577808	1.67712	0.00693191	2.99225	85.0868
2735.61	ML-49	Ol-11	227.943	40.4392	0.0576	14.1828	0.3247	0.2278	45.5534	0.2539	101.156		0.998793	0.00112479	0.292948	0.00645058	0.00476554	1.67727	0.00671882	2.9897	85.1312
2735.61	ML-49	Ol-11	235.803	40.6014	0.0295	14.2228	0.348	0.2023	45.6539	0.2556	101.413		1.0005	0.00057474	0.293099	0.00689758	0.00422236	1.6771	0.00674827	2.99051	85.1234
2735.61	ML-49	Ol-11	243.663	40.7738	0.0439	14.3227	0.3393	0.2272	45.684	0.2556	101.763		1.00103	0.000852132	0.294068	0.00670031	0.00472456	1.67201	0.00672334	2.98747	85.0429
2735.61	ML-49	Ol-11	251.523	40.5	0.0391	14.1928	0.3263	0.1765	45.6137	0.2556	101.212		0.999538	0.00076295	0.292933	0.00647746	0.00368956	1.67822	0.00675869	2.98951	85.139
2735.61	ML-49	Ol-11	259.383	40.4595	0.0624	13.9929	0.3225	0.2347	45.5333	0.2601	100.957		1.00064	0.00122016	0.289415	0.00641552	0.00491651	1.67879	0.00689218	2.98962	85.2955
2735.61	ML-49	Ol-11	267.243	40.4696	0.0398	13.9029	0.3418	0.2035	45.6338	0.261	100.95		1.0007	0.000778097	0.2875	0.00679816	0.00426212	1.68217	0.0069147	2.99078	85.4037
2735.61	ML-49	Ol-11	275.103	40.642	0.0537	13.9629	0.3468	0.1885	45.9654	0.2476	101.479		0.999942	0.0010446	0.287297	0.00686314	0.00392823	1.68593	0.00652692	2.99291	85.4402
2735.61	ML-49	Ol-11	282.963	40.6724	0.0521	13.8729	0.3266	0.2115	46.1463	0.2552	101.609		0.999288	0.00101205	0.285046	0.00645432	0.00440136	1.69019	0.00671783	2.99474	85.569
2735.61	ML-49	Ol-11	290.823	40.6826	0.0448	13.693	0.3294	0.2181	46.096	0.2504	101.392		1.00064	0.000871208	0.281659	0.00651682	0.0045437	1.69021	0.00659873	2.9926	85.7161
2735.61	ML-49	Ol-11	298.683	40.5	0.0481	14.0229	0.3237	0.2217	45.7946	0.2467	101.209		1.00003	0.000939029	0.289569	0.00642903	0.00463671	1.6857	0.00652658	2.99517	85.3403
2735.61	ML-49	Ol-11	306.543	40.277	0.0796	15.0224	0.3076	0.1839	44.9806	0.2341	101.151		0.999208	0.0015613	0.311669	0.00613804	0.00386426	1.66354	0.00622241	2.99344	84.2209
2735.61	ML-49	Ol-11	314.403	40.1147	0.0741	16.2218	0.2408	0.2629	44.1867	0.2356	101.513		0.995649	0.00145411	0.33671	0.00480732	0.00552687	1.63494	0.00626521	2.9869	82.9224
2735.61	ML-49	Ol-11	322.263	39.8511	0.07	16.9314	0.2292	0.243	43.4129	0.2524	101.096		0.997632	0.00138549	0.35447	0.00461518	0.00515255	1.62016	0.00676982	2.99123	82.0488
2735.61	ML-49	Ol-11	330.123	39.9525	0.0515	17.651	0.2084	0.2335	43.0511	0.2357	101.489		0.998964	0.0010181	0.36909	0.00419129	0.00494514	1.60472	0.00631427	2.99069	81.3006
2735.61	ML-49	Ol-11	337.983	39.8207	0.026	18.3307	0.1798	0.2579	42.418	0.244	101.377		1.00022	0.000516338	0.385053	0.00363261	0.00548684	1.58834	0.00656649	2.99096	80.4878
2735.61	ML-49	Ol-11	345.843	39.5671	0.0368	18.4006	0.1973	0.2989	41.9959	0.2674	100.834		1.00082	0.000735945	0.389235	0.00401415	0.00640375	1.58357	0.00724672	2.99318	80.27
2735.61	ML-49	Ol-24	0	39.4962	0.0254	17.0014	0.214	0.2276	42.9808	0.2799	100.336		0.997788	0.000507332	0.359189	0.00434852	0.00487014	1.6187	0.00757607	2.99486	81.8398
2735.61	ML-49	Ol-24	7.60168	39.8713	0.0433	17.1713	0.2215	0.248	43.1918	0.2491	101.115		0.999041	0.000857799	0.359816	0.00446416	0.00526332	1.61336	0.00668734	2.99131	81.7646
2735.61	ML-49	Ol-24	15.2017	39.922	0.0271	16.7215	0.2151	0.1875	43.835	0.2382	101.232		0.997338	0.000535272	0.34935	0.00432229	0.0039675	1.63252	0.00637572	2.99579	82.3727
2735.61	ML-49	Ol-24	22.8017	39.993	0.0746	14.5726	0.2704	0.1823	44.87	0.2306	100.298		0.998519	0.0014726	0.304274	0.00543028	0.00385518	1.67008	0.00616863	2.99159	84.5887
2735.61	ML-49	Ol-24	30.4017	40.1756	0.0596	13.0734	0.3458	0.205	46.1765	0.2262	100.331		0.997081	0.00116947	0.271339	0.00690299	0.00430932	1.70843	0.00601477	2.99671	86.2944
2735.61	ML-49	Ol-24	38.0017	40.3986	0.0943	12.4937	0.371	0.177	46.7291	0.2237	100.546		0.99725	0.00184045	0.257919	0.0073664	0.00370081	1.71963	0.00591645	2.99461	86.9576
2735.61	ML-49	Ol-24	45.6017	40.642	0.0947	12.3537	0.3598	0.1494	46.8196	0.2208	100.71		1.00036	0.00184292	0.254293	0.00712337	0.0031147	1.71797	0.00582287	2.99191	87.1066
2735.61	ML-49	Ol-24	53.2017	40.571	0.0764	12.2138	0.3508	0.1529	46.9804	0.2228	100.651		0.998537	0.00148668	0.251394	0.00694467	0.00318743	1.72375	0.00587518	2.9927	87.2721
2735.61	ML-49	Ol-24	60.8017	40.4899	0.0863	12.3337	0.3365	0.1834	46.8296	0.2245	100.571		0.99809	0.00168194	0.254257	0.00667194	0.0038292	1.72089	0.00592921	2.99275	87.1272
2735.61	ML-49	Ol-24	68.4017	40.571	0.0796	12.3737	0.3661	0.1971	46.91	0.2214	100.791		0.998331	0.00154863	0.254633	0.00724606	0.004108	1.72081	0.00583706	2.99403	87.1101
2735.61	ML-49	Ol-24	76.0017	40.5507	0.075	12.3937	0.3418	0.125	46.6689	0.2213	100.457		1.00056	0.00146312	0.255741	0.00678358	0.00261239	1.71664	0.00585035	2.99105	87.0339
2735.61	ML-49	Ol-24	83.6017	40.3682	0.0767	12.2838	0.3299	0.1798	46.5282	0.2273	100.043		1.00049	0.00150295	0.254602	0.00657658	0.00377441	1.71909	0.00603575	2.99328	87.1002
2735.61	ML-49	Ol-24	91.2017	40.5305	0.0736	12.3237	0.3634	0.1564	46.3674	0.2239	100.089		1.00373	0.00144108	0.255232	0.00723877	0.00328064	1.71182	0.00594084	2.98959	87.0246
2735.61	ML-49	Ol-24	98.8017	40.2567	0.0755	12.2538	0.3356	0.1191	46.5282	0.2151	99.8423		0.999414	0.00148194	0.25441	0.00670152	0.00250441	1.722	0.00572144	2.99349	87.1277
2735.61	ML-49	Ol-24	106.402	40.3682	0.0538	12.3737	0.3786	0.1285	46.8497	0.2227	100.438		0.997175	0.00105073	0.255616	0.0075224	0.00268857	1.72523	0.00589399	2.9965	87.0956
2735.61	ML-49	Ol-24	114.002	40.4798	0.0664	12.2138	0.3475	0.1816	47.1814	0.2184	100.788		0.995352	0.00129087	0.251157	0.00687286	0.00378216	1.72949	0.00575372	2.99523	87.3194
2735.61	ML-49	Ol-24	121.602	40.5812	0.0545	12.1338	0.3698	0.2417	46.8397	0.2266	100.591		0.998635	0.00106036	0.24971	0.0073197	0.00503784	1.71832	0.00597448	2.98774	87.3117
2735.61	ML-49	Ol-24	129.202	40.642	0.0861	12.2638	0.3365	0.212	47.0105	0.2239	100.872		0.99808	0.00167174	0.251866	0.0066469	0.00440973	1.72105	0.00589118	2.99112	87.2338
2735.61	ML-49	Ol-22	0	39.7902	0.0287	17.3212	0.1975	0.2239	42.9607	0.2415	100.824		1.00104	0.000570863	0.364425	0.00399655	0.00477106	1.61122	0.00650953	2.99361	81.5541
2735.61	ML-49	Ol-22	6.8728	39.77	0.0372	16.8914	0.2179	0.2437	43.5033	0.2306	100.962		0.997564	0.000737741	0.35433	0.00439629	0.00517758	1.62673	0.0061973	2.99645	82.1142
2735.61	ML-49	Ol-22	13.7428	39.6888	0.0333	16.5316	0.2411	0.206	43.242	0.2289	100.251		1.0008	0.000663892	0.348617	0.00489012	0.00439978	1.62552	0.00618417	2.99248	82.3408
2735.61	ML-49	Ol-22	20.6128	39.5469	0.0359	16.1618	0.2242	0.2175	43.7043	0.2233	100.245		0.995333	0.000714375	0.340175	0.00453875	0.00463662	1.63979	0.00602148	2.99272	82.8192
2735.61	ML-49	Ol-22	27.4828	40.0539	0.0576	15.4721	0.2695	0.2645	44.1666	0.2328	100.583		1.00163	0.00113883	0.323569	0.0054208	0.00560238	1.64651	0.00623737	2.99104	83.5758
2735.61	ML-49	Ol-22	34.3528	40.0032	0.0718	14.7125	0.327	0.2327	44.9404	0.2335	100.58		0.997608	0.00141568	0.306838	0.00655929	0.00491527	1.67075	0.00623893	2.99545	84.4842
2735.61	ML-49	Ol-22	41.2228	40.277	0.058	14.1228	0.3087	0.1733	45.3625	0.2394	100.616		1.00056	0.00113917	0.293402	0.00616831	0.00364645	1.67993	0.00637187	2.99252	85.1316
2735.61	ML-49	Ol-22	48.0928	40.135	0.0407	13.693	0.3257	0.2406	45.4027	0.2365	100.145		1.00064	0.000802275	0.285502	0.00653153	0.00508083	1.6875	0.00631746	2.99378	85.5295
2735.61	ML-49	Ol-22	54.9628	40.3074	0.0569	13.863	0.343	0.1825	45.4228	0.2381	100.504		1.00114	0.00111737	0.287953	0.00685248	0.00383935	1.68187	0.00633617	2.99061	85.3818
2735.61	ML-49	Ol-22	61.8328	40.2668	0.0559	13.6531	0.3165	0.1931	45.473	0.239	100.271		1.00148	0.00109921	0.283975	0.00633157	0.00406782	1.68599	0.00636868	2.99055	85.5848
2735.61	ML-49	Ol-22	68.7028	40.1958	0.0554	13.723	0.3199	0.2211	45.7041	0.2315	100.519		0.998419	0.00108797	0.285061	0.00639131	0.00465164	1.69237	0.00616084	2.99562	85.5843
2735.61	ML-49	Ol-22	75.5728	40.2161	0.0449	13.823	0.3164	0.1495	45.7041	0.2399	100.541		0.99888	0.000881728	0.287125	0.00632111	0.00314514	1.6923	0.00638412	2.9961	85.4945
2735.61	ML-49	Ol-22	82.4428	40.1249	0.0479	13.703	0.3261	0.1965	45.684	0.2329	100.353		0.998522	0.000942443	0.285179	0.00652738	0.00414183	1.6948	0.00620971	2.99723	85.5968
2735.61	ML-49	Ol-22	89.3128	40.2567	0.0468	13.793	0.3546	0.1688	45.7343	0.2387	100.661		0.998665	0.000917917	0.286152	0.00707562	0.00354683	1.69135	0.00634442	2.99544	85.5296
2735.61	ML-49	Ol-22	96.1828	40.2161	0.0305	13.8829	0.3185	0.2332	45.7946	0.2435	100.76		0.99763	0.000598197	0.28801	0.0063551	0.00489986	1.69353	0.00647181	2.99843	85.4653
2735.61	ML-49	Ol-22	103.053	40.0944	0.0286	13.713	0.316	0.1406	45.5232	0.2376	100.123		0.999568	0.000563728	0.285902	0.00633665	0.00296893	1.69188	0.00634647	2.99499	85.5443
2735.61	ML-49	Ol-22	109.923	40.0336	0.0354	13.823	0.333	0.1684	46.0759	0.232	100.767		0.992856	0.000694129	0.286694	0.00664278	0.00353744	1.70351	0.00616463	3.00142	85.5947
2735.61	ML-49	Ol-22	116.793	40.0437	0.0484	13.723	0.3041	0.2648	45.6438	0.2363	100.322		0.99709	0.000952841	0.285763	0.0060906	0.00558475	1.6943	0.00630407	2.99724	85.568
2735.61	ML-49	Ol-22	123.663	40.4899	0.0547	13.783	0.3179	0.2079	45.4529	0.2336	100.593		1.00436	0.00107277	0.285919	0.00634276	0.00436801	1.68079	0.00620832	2.98995	85.4621
2735.61	ML-49	Ol-22	130.533	40.1553	0.0569	13.803	0.3167	0.1974	45.7142	0.2385	100.53		0.997805	0.00111787	0.286835	0.00632987	0.00415466	1.69341	0.00634964	2.99694	85.5152
2735.61	ML-49	Ol-22	137.403	40.3581	0.0494	13.8929	0.3379	0.2341	45.8448	0.2336	101.008		0.998442	0.000966262	0.287437	0.00672395	0.00490546	1.6908	0.00619188	2.99653	85.47
2735.61	ML-49	Ol-22	144.273	40.1654	0.0752	13.9029	0.2921	0.2012	45.6539	0.2421	100.573		0.997934	0.00147721	0.288877	0.00583748	0.00423412	1.69097	0.00644469	2.99684	85.4091
2735.61	ML-49	Ol-22	151.143	40.3074	0.0469	14.1728	0.3123	0.2233	45.3424	0.241	100.708		1.00094	0.000920818	0.294332	0.00623794	0.00469678	1.67856	0.0064121	2.99335	85.0812
2735.61	ML-49	Ol-22	158.013	40.1046	0.05	15.0324	0.2655	0.2477	44.5887	0.2443	100.609		1.00081	0.000986517	0.31372	0.00532927	0.00523565	1.65879	0.00653191	2.99282	84.0954
2735.61	ML-49	Ol-22	164.883	39.77	0.0488	16.1218	0.2351	0.2574	43.9958	0.2515	100.783		0.99577	0.000966049	0.337578	0.00473479	0.00545881	1.64219	0.00674683	2.9949	82.9486
2735.61	ML-49	Ol-22	171.753	39.8308	0.0456	16.8714	0.2155	0.2249	43.3626	0.2681	100.901		0.999574	0.000904767	0.354082	0.00434998	0.00478048	1.62226	0.0072086	2.99473	82.084
2735.61	ML-49	Ol-18	0	39.1548	0.0591	16.9817	0.21	0.2463	42.9273	0.2542	99.8334		0.9957	0.00118825	0.361144	0.00429543	0.0053051	1.62736	0.0069259	3.00192	81.8384		0.25	39.94	0.52	10.21	8.41	0.27	1.5		26-03-2013	30	15
2735.61	ML-49	Ol-18	9.99513	39.323	0.0442	15.8323	0.2924	0.2211	43.84	0.2519	99.8049		0.995276	0.000884494	0.335118	0.00595276	0.00473993	1.65415	0.00683098	3.00296	83.1537		0.25	32.13	0.56	8.75	9.41	0.26	2.26		26-03-2013	30	15
2735.61	ML-49	Ol-18	19.9951	39.5603	0.0438	14.9991	0.3148	0.2491	44.7428	0.2538	100.164		0.993947	0.000870067	0.315154	0.00636182	0.00530106	1.67585	0.00683207	3.00431	84.1711		0.25	43.96	0.58	6.55	10.22	0.26	2.26		26-03-2013	30	15
2735.61	ML-49	Ol-18	29.9951	39.5208	0.0325	14.7979	0.3108	0.2125	45.0801	0.2542	100.209		0.991738	0.000644808	0.310548	0.00627331	0.00451665	1.68642	0.00683447	3.00697	84.449		0.25	46.16	0.6	6.21	9.16	0.25	2.27		26-03-2013	30	15
2735.61	ML-49	Ol-18	39.9951	39.7186	0.0304	14.865	0.3383	0.2182	44.9808	0.2557	100.407		0.99466	0.000601907	0.311316	0.00681438	0.0046283	1.67926	0.00686071	3.00414	84.3605		0.25	58.41	0.6	6.28	10.72	0.25	2.25		26-03-2013	30	15
2735.61	ML-49	Ol-18	49.9951	39.5603	0.0379	15.0086	0.2902	0.2155	44.6932	0.242	100.048		0.994827	0.000753533	0.315635	0.00586987	0.00459008	1.67547	0.00652019	3.00367	84.1478		0.25	61.87	0.6	5.85	10.36	0.25	2.23		26-03-2013	30	15
2735.61	ML-49	Ol-18	59.9951	39.5504	0.064	15.1044	0.3167	0.2073	44.5543	0.2538	100.051		0.99494	0.00127292	0.317764	0.00640822	0.00441703	1.67087	0.00684061	3.00251	84.021		0.25	51.7	0.59	6.71	10.71	0.25	2.35		26-03-2013	30	15
2735.61	ML-49	Ol-18	69.9951	39.4812	0.0333	15.2481	0.3287	0.1944	44.6336	0.243	100.162		0.993108	0.000662256	0.320758	0.00665043	0.00414179	1.6737	0.00654893	3.00557	83.9175		0.25	31.28	0.59	6.19	10.67	0.25	2.23		26-03-2013	30	15
2735.61	ML-49	Ol-18	79.9951	39.6098	0.0466	15.2577	0.3201	0.1881	44.5543	0.2471	100.224		0.995275	0.000925768	0.320616	0.00646949	0.00400327	1.66893	0.00665229	3.00287	83.885		0.25	57.89	0.59	5.97	11.59	0.25	2.33		26-03-2013	30	15
2735.61	ML-49	Ol-18	89.9951	39.5406	0.0289	15.5354	0.3465	0.2122	44.6138	0.2434	100.521		0.992424	0.000573493	0.326087	0.00699523	0.00451113	1.66929	0.00654535	3.00643	83.6579		0.25	42.43	0.59	6.21	12.15	0.25	2.31		26-03-2013	30	15
2735.61	ML-49	Ol-18	99.9951	39.4713	0.0546	15.5642	0.2922	0.2181	44.4749	0.247	100.322		0.992526	0.0010855	0.327297	0.00590996	0.00464517	1.66718	0.00665449	3.0053	83.5899		0.25	68.29	0.58	5.73	10.72	0.25	2.33		26-03-2013	30	15
2735.61	ML-49	Ol-18	109.995	39.412	0.0589	15.5929	0.2899	0.193	44.3459	0.2472	100.14		0.992904	0.00117319	0.32852	0.0058745	0.00411834	1.66549	0.00667245	3.00475	83.5246		0.25	37.19	0.58	6.72	10.7	0.25	2.31		26-03-2013	30	15
2735.61	ML-49	Ol-18	119.995	39.4219	0.0572	15.5642	0.3247	0.2296	44.1773	0.2398	100.015		0.99446	0.00114083	0.328346	0.00658834	0.00490578	1.66134	0.00648122	3.00326	83.4976		0.25	33.4	0.58	6.75	12.01	0.25	2.32		26-03-2013	30	15
2735.61	ML-49	Ol-18	129.995	39.3032	0.0216	15.8611	0.3321	0.21	44.207	0.2404	100.175		0.991711	0.00043091	0.334692	0.00674016	0.0044881	1.66287	0.00649904	3.00743	83.2449		0.25	34.51	0.58	6.05	9.9	0.25	2.36		26-03-2013	30	15
2735.61	ML-49	Ol-18	139.995	39.3428	0.0709	15.6791	0.317	0.228	44.1673	0.246	100.051		0.992748	0.00141448	0.330865	0.00643395	0.00487298	1.66144	0.00665069	3.00442	83.3928		0.25	89.75	0.58	5.89	11.01	0.25	2.37		26-03-2013	30	15
2735.61	ML-49	Ol-18	149.995	39.2142	0.049	15.8802	0.3066	0.2217	44.0285	0.2321	99.9323		0.991859	0.000979893	0.335908	0.00623768	0.00474962	1.66016	0.00628984	3.00618	83.1715		0.25	27.56	0.58	6.23	10.37	0.25	2.31		26-03-2013	30	15
2735.61	ML-49	Ol-18	159.995	39.0658	0.019	15.7653	0.351	0.1959	43.8003	0.2412	99.4385		0.993008	0.000381843	0.335131	0.0071764	0.0042177	1.65974	0.00656887	3.00623	83.2004		0.26	39.47	0.58	6.39	10.18	0.26	2.42		26-03-2013	30	15
2735.61	ML-49	Ol-18	169.995	39.1548	0.0281	15.7653	0.3418	0.2507	43.6316	0.2411	99.4135		0.995352	0.000564772	0.335158	0.00698888	0.00539798	1.65349	0.00656669	3.00352	83.1464		0.25	103.9	0.58	5.59	11.52	0.26	2.34		26-03-2013	30	15
2735.61	ML-49	Ol-18	179.995	39.0757	0.0581	15.8898	0.3178	0.1861	43.8995	0.2342	99.6612		0.991231	0.00116525	0.337087	0.00648434	0.00399853	1.66011	0.00636521	3.00644	83.1219		0.25	67.51	0.58	5.71	8.75	0.26	2.33		26-03-2013	30	15
2735.61	ML-49	Ol-18	189.995	39.2834	0.0542	15.9664	0.3537	0.2106	44.1078	0.2336	100.21		0.991283	0.00108134	0.33694	0.00717906	0.00450125	1.65925	0.00631566	3.00655	83.1209		0.25	33.28	0.58	6.13	12.02	0.25	2.4		26-03-2013	30	15
2735.61	ML-49	Ol-18	199.995	39.2735	0.0623	16.0239	0.325	0.2281	44.0285	0.2417	100.183		0.991474	0.0012435	0.338303	0.00659947	0.00487745	1.657	0.00653756	3.00604	83.0451		0.25	36.24	0.57	5.6	10.79	0.25	2.41		26-03-2013	30	15
2735.61	ML-49	Ol-18	209.995	39.4417	0.0822	16.0143	0.3253	0.1985	44.0979	0.2453	100.405		0.992849	0.00163597	0.337126	0.00658652	0.00423228	1.65483	0.00661581	3.00388	83.0757		0.26	31.66	0.57	6.07	10.06	0.26	2.34		26-03-2013	30	15
2735.61	ML-49	Ol-18	219.995	39.3526	0.0278	15.8898	0.3246	0.1855	43.9392	0.2414	99.9609		0.994762	0.000555604	0.335908	0.00659991	0.00397169	1.65579	0.00653793	3.00413	83.1346		0.25	24.49	0.58	6.11	11.41	0.26	2.31		26-03-2013	30	15
2735.61	ML-49	Ol-18	229.995	39.412	0.0529	15.976	0.3309	0.2172	44.0285	0.2365	100.254		0.993687	0.00105451	0.336857	0.00671061	0.00463839	1.65487	0.00638866	3.0042	83.0872		0.26	73.88	0.58	6.06	12.04	0.26	2.36		26-03-2013	30	15
2735.61	ML-49	Ol-18	239.995	39.4614	0.0557	15.9952	0.3409	0.2427	44.2368	0.2451	100.578		0.991989	0.00110704	0.336263	0.00689294	0.00516761	1.65778	0.00660138	3.0058	83.1366		0.25	38.48	0.58	6.05	10.39	0.26	2.38		26-03-2013	30	15
2735.61	ML-49	Ol-18	249.995	39.412	0.0711	16.0335	0.3345	0.2342	44.0781	0.248	100.411		0.992468	0.00141558	0.337654	0.0067753	0.00499529	1.6547	0.0066911	3.0047	83.0525		0.25	35.15	0.58	5.88	9.49	0.25	2.32		26-03-2013	30	15
2735.61	ML-49	Ol-18	259.995	39.3329	0.0737	16.0526	0.3322	0.2212	44.0681	0.2314	100.312		0.991609	0.00146902	0.338444	0.00673641	0.00472341	1.65622	0.00625037	3.00545	83.0325		0.25	27.89	0.58	5.99	9.86	0.26	2.3		26-03-2013	30	15
2735.61	ML-49	Ol-18	269.995	39.2834	0.0399	15.9856	0.3079	0.2193	44.0781	0.2332	100.147		0.99186	0.000796507	0.33754	0.00625309	0.00468992	1.6591	0.00630852	3.00655	83.0946		0.26	27.43	0.57	5.95	10.25	0.26	2.43		26-03-2013	30	15
2735.61	ML-49	Ol-18	279.995	39.3329	0.0514	15.9664	0.318	0.1831	44.0086	0.245	100.105		0.993129	0.0010261	0.337143	0.00645834	0.00391583	1.65652	0.00662787	3.00482	83.0893		0.26	48.32	0.58	6.39	10.63	0.26	2.42		26-03-2013	30	15
2735.61	ML-49	Ol-18	289.995	39.323	0.0424	16.0622	0.3175	0.2089	44.1376	0.243	100.335		0.991311	0.000845094	0.33863	0.00643801	0.00446055	1.65875	0.00656338	3.007	83.0463		0.26	37.99	0.58	6.21	12.46	0.26	2.32		26-03-2013	30	15
2735.61	ML-49	Ol-18	299.995	39.412	0.0421	16.1388	0.328	0.219	44.2269	0.2332	100.6		0.991175	0.000837105	0.33943	0.00663499	0.004665	1.65812	0.0062836	3.00715	83.0077		0.26	47.25	0.57	6.15	10.85	0.26	2.33		26-03-2013	30	15
2735.61	ML-49	Ol-18	309.995	39.5307	0.0368	16.2155	0.3368	0.2138	44.1971	0.2413	100.772		0.992564	0.000730546	0.340494	0.00680205	0.00454692	1.65435	0.00649141	3.00598	82.9313		0.25	45.88	0.57	6.04	10.42	0.26	2.44		26-03-2013	30	15
2735.61	ML-49	Ol-18	319.995	39.4021	0.034	16.0431	0.3489	0.2224	44.0681	0.239	100.358		0.992986	0.000677451	0.338117	0.00707243	0.00474727	1.65561	0.00645326	3.00566	83.0409		0.25	53.82	0.57	5.89	10.6	0.26	2.36		26-03-2013	30	15
2735.61	ML-49	Ol-18	329.995	39.412	0.0575	16.0239	0.3066	0.2356	44.0582	0.2449	100.339		0.993059	0.00114549	0.337653	0.00621388	0.00502814	1.65494	0.00661139	3.00465	83.0546		0.25	56.49	0.57	5.72	10.67	0.26	2.39		26-03-2013	30	15
2735.61	ML-49	Ol-18	339.995	39.3823	0.0638	15.8706	0.2963	0.2083	44.1078	0.2444	100.174		0.993128	0.00127204	0.334699	0.00601007	0.00444917	1.65817	0.00660333	3.00433	83.2051		0.25	34.78	0.58	6.42	9.8	0.26	2.32		26-03-2013	30	15
2735.61	ML-49	Ol-18	349.995	39.5109	0.0616	15.9377	0.3465	0.2072	44.1277	0.236	100.428		0.994064	0.00122533	0.335335	0.00701204	0.00441543	1.65507	0.00636161	3.00349	83.1524		0.26	31.67	0.58	6.67	11	0.26	2.34		26-03-2013	30	15
2735.61	ML-49	Ol-18	359.995	39.5702	0.0376	16.0335	0.3262	0.232	44.3162	0.2355	100.751		0.99289	0.000745926	0.336447	0.00658356	0.00493068	1.65769	0.00633113	3.00562	83.1282		0.25	32.28	0.58	5.78	10.89	0.26	2.4		26-03-2013	30	15
2735.61	ML-49	Ol-18	369.995	39.4911	0.0424	16.0622	0.33	0.2155	44.336	0.2398	100.717		0.991524	0.000841677	0.33726	0.00666441	0.00458286	1.65947	0.00645076	3.00679	83.1094		0.25	55.91	0.58	6.01	9.75	0.25	2.41		26-03-2013	30	15
2735.61	ML-49	Ol-18	379.995	39.5307	0.0396	16.0718	0.322	0.2169	44.088	0.2404	100.509		0.994351	0.000787547	0.338085	0.00651487	0.00462116	1.65323	0.00647885	3.00407	83.0221		0.25	45.95	0.58	5.99	10.72	0.25	2.38		26-03-2013	30	15
2735.61	ML-49	Ol-18	389.995	39.3526	0.0483	16.0718	0.325	0.228	44.2864	0.2491	100.561		0.989989	0.00096068	0.338124	0.00657633	0.00485822	1.66087	0.0067141	3.00809	83.0853		0.25	49.1	0.57	6.07	10.48	0.26	2.35		26-03-2013	30	15
2735.61	ML-49	Ol-18	399.995	39.4219	0.0448	15.9281	0.326	0.2091	44.1376	0.2404	100.308		0.993207	0.000892392	0.335601	0.00660638	0.00446213	1.65775	0.00648925	3.00501	83.164		0.26	41.13	0.57	6.07	10.05	0.26	2.28		26-03-2013	30	15
2735.61	ML-49	Ol-18	409.995	39.501	0.0357	16.158	0.3291	0.2163	44.2467	0.2537	100.741		0.991986	0.000708828	0.339344	0.00664766	0.00460087	1.65648	0.00682614	3.0066	82.9973		0.26	43.33	0.58	6.13	11.12	0.26	2.36		26-03-2013	30	15
2735.61	ML-49	Ol-18	419.995	39.4417	0.0854	16.0047	0.3228	0.2224	44.3062	0.2421	100.625		0.990822	0.00169619	0.336237	0.00652256	0.00473218	1.65926	0.00651618	3.00579	83.1502		0.25	56.78	0.57	6.04	10.78	0.26	2.26		26-03-2013	30	15
2735.61	ML-49	Ol-18	429.995	39.4614	0.0444	16.0335	0.325	0.2498	44.4451	0.2425	100.802		0.990083	0.000880759	0.336421	0.00655882	0.00530856	1.66238	0.00651881	3.00816	83.1689		0.26	24.11	0.58	6.09	10.41	0.25	2.36		26-03-2013	30	15
2735.61	ML-49	Ol-18	439.995	39.4812	0.0352	15.8515	0.329	0.2345	44.5741	0.2499	100.755		0.990232	0.000698014	0.332485	0.00663722	0.00498167	1.66662	0.00671537	3.00837	83.3683		0.26	43.97	0.58	6.12	9.24	0.25	2.36		26-03-2013	30	15
2735.61	ML-49	Ol-18	449.995	39.4021	0.0535	15.8898	0.3275	0.1919	44.3261	0.2479	100.439		0.991305	0.00106419	0.33432	0.0066274	0.0040893	1.66248	0.00668224	3.00657	83.2572		0.26	56.18	0.58	6.02	9.84	0.25	2.29		26-03-2013	30	15
2735.61	ML-49	Ol-18	459.995	39.4812	0.0447	15.909	0.3353	0.2033	44.4055	0.2398	100.619		0.991556	0.000887584	0.334137	0.00677336	0.00432464	1.66254	0.00645258	3.00667	83.2653		0.26	37.25	0.58	5.97	11.83	0.25	2.31		26-03-2013	30	15
2735.61	ML-49	Ol-18	469.995	39.6691	0.0614	15.7749	0.3241	0.2456	44.6336	0.2456	100.954		0.992062	0.00121403	0.329919	0.00651942	0.00520236	1.66401	0.0065807	3.00551	83.4538		0.25	44.25	0.58	5.92	11.36	0.25	2.37		26-03-2013	30	15
2735.61	ML-49	Ol-18	479.995	39.412	0.0113	15.7174	0.3535	0.2228	45.3082	0.2489	101.274		0.983587	0.000222966	0.328036	0.00709607	0.00470961	1.68566	0.00665529	3.01597	83.7098		0.25	33.06	0.58	6.11	9.26	0.25	2.33		26-03-2013	30	15
2735.61	ML-49	Ol-18	489.995	39.323	0.0564	15.5067	0.3387	0.2195	44.7725	0.2488	100.466		0.987903	0.00112027	0.325794	0.00684427	0.00467077	1.67683	0.00669694	3.00986	83.7316		0.26	174.57	0.58	5.63	10.01	0.25	2.31		26-03-2013	30	15
2735.61	ML-49	Ol-18	499.995	39.679	0.0638	15.5163	0.3115	0.1975	44.7031	0.2434	100.715		0.993181	0.00126259	0.324796	0.00627147	0.00418717	1.66807	0.00652748	3.00429	83.702		0.26	35.16	0.59	5.84	10.51	0.25	2.29		26-03-2013	30	15
2735.61	ML-49	Ol-18	509.995	39.9955	0.0356	14.6064	0.3059	0.2028	45.3479	0.272	100.766		0.996134	0.000701023	0.304232	0.00612816	0.00427819	1.68373	0.00725827	3.00246	84.6963		0.25	31.33	0.59	6.32	11.49	0.25	2.34		26-03-2013	30	15
2735.61	ML-49	Ol-18	519.995	39.6296	0.0409	15.2194	0.313	0.2091	44.9312	0.2509	100.594		0.992206	0.00080962	0.318665	0.00630334	0.00443427	1.67703	0.0067304	3.00617	84.0323		0.26	46.97	0.58	5.79	11.52	0.25	2.27		26-03-2013	30	15
2735.61	ML-49	Ol-18	529.995	39.4614	0.0431	15.0278	0.309	0.2159	45.0602	0.2537	100.371		0.989815	0.000854739	0.315233	0.00623424	0.0045869	1.68493	0.00681803	3.00848	84.2397		0.25	53.74	0.6	6.39	11.18	0.25	2.14		26-03-2013	30	15
2735.61	ML-49	Ol-18	539.995	39.5109	0.0534	14.8937	0.3052	0.2031	45.1594	0.2558	100.382		0.99014	0.00105803	0.312132	0.00615188	0.00431097	1.68708	0.00686812	3.00774	84.3873		0.25	50.28	0.59	6.26	10.81	0.25	2.29		26-03-2013	30	15
2735.61	ML-49	Ol-18	549.995	39.5504	0.0432	14.7213	0.3078	0.2037	45.2686	0.2548	100.35		0.990666	0.000855529	0.308374	0.00620138	0.00432168	1.69037	0.00683806	3.00762	84.5716		0.26	45.4	0.6	6.32	10.49	0.25	2.26		26-03-2013	30	15
2735.61	ML-49	Ol-18	559.995	39.3625	0.0519	14.7117	0.3107	0.1689	45.4571	0.2501	100.313		0.986666	0.00102856	0.308394	0.00626429	0.00358593	1.69862	0.00671674	3.01128	84.6342		0.25	37.43	0.6	6.39	11.3	0.25	2.25		26-03-2013	30	15
2735.61	ML-49	Ol-18	569.995	39.5109	0.0638	14.5489	0.2761	0.2029	45.2884	0.2574	100.148		0.990719	0.00126482	0.305084	0.00556857	0.00430925	1.69289	0.00691512	3.00675	84.7303		0.25	45.95	0.6	6.33	11.05	0.25	2.25		26-03-2013	30	15
2735.61	ML-49	Ol-18	579.995	39.4515	0.0282	15.114	0.3322	0.1548	44.8023	0.2726	100.156		0.991933	0.000560587	0.3178	0.00671834	0.00329667	1.67929	0.00734348	3.00695	84.0869		0.26	37.19	0.6	6.28	13.19	0.25	2.29		26-03-2013	30	15
2735.61	ML-49	Ol-4b	0	39.5999	0.0432	17.5851	0.216	0.2703	43.3836	0.2765	101.375		0.993836	0.000857195	0.369081	0.00436032	0.00574582	1.62314	0.00743487	3.00445	81.4739		0.25	43.98	0.55	8.63	8.64	0.26	2.13		26-03-2013	30	15
2735.61	ML-49	Ol-4b	4.98348	39.5406	0.0341	17.1062	0.216	0.1942	43.7606	0.2449	101.097		0.992826	0.000676956	0.359203	0.00436243	0.00413015	1.63803	0.00658836	3.00582	82.015		0.25	57.44	0.56	8.54	11.78	0.26	2.35		26-03-2013	30	15
2735.61	ML-49	Ol-4b	9.96348	39.5603	0.05	16.8093	0.2389	0.2503	44.0384	0.2495	101.197		0.99137	0.000990652	0.352274	0.00481544	0.00531278	1.64519	0.0066989	3.00665	82.3639		0.25	40.32	0.56	7.79	9.3	0.26	2.31		26-03-2013	30	15
2735.61	ML-49	Ol-4b	14.9435	39.8966	0.0397	15.7557	0.2746	0.2401	44.9114	0.239	101.357		0.993093	0.000781304	0.327981	0.00549792	0.00506212	1.66655	0.00637397	3.00534	83.556		0.25	49.63	0.58	7.06	9.56	0.25	2.38		26-03-2013	30	15
2735.61	ML-49	Ol-4b	19.9235	40.0845	0.0759	14.4531	0.3195	0.2199	46.0424	0.2469	101.442		0.991074	0.0014837	0.298846	0.00635396	0.00460512	1.69706	0.00654046	3.00596	85.027		0.25	25.95	0.61	6.19	10.3	0.25	2.3		26-03-2013	30	15
2735.61	ML-49	Ol-4b	24.9035	40.1636	0.0623	13.8784	0.3233	0.1995	46.3301	0.2397	101.197		0.992709	0.00121745	0.28687	0.00642745	0.00417655	1.70711	0.00634768	3.00486	85.6132		0.25	32.71	0.62	6.09	11.34	0.25	2.38		26-03-2013	30	15
2735.61	ML-49	Ol-4b	29.8835	40.0054	0.0494	13.6198	0.3275	0.2046	46.3698	0.2325	100.809		0.991888	0.000968382	0.282405	0.0065313	0.00429671	1.71391	0.00617625	3.00617	85.8537		0.25	40.99	0.63	6.06	11.3	0.25	2.42		26-03-2013	30	15
2735.61	ML-49	Ol-4b	34.8635	40.0746	0.0499	13.5815	0.3236	0.2092	46.4987	0.2324	100.97		0.991758	0.000976365	0.281087	0.00644152	0.00438514	1.71548	0.00616212	3.00629	85.9215		0.25	40.27	0.63	6.06	10.63	0.25	2.42		26-03-2013	30	15
2735.61	ML-49	Ol-4b	39.8435	40.1142	0.054	13.6869	0.3308	0.1819	46.6277	0.2426	101.238		0.990513	0.00105422	0.282633	0.0065701	0.00380435	1.71639	0.00641816	3.00738	85.8614		0.25	37.09	0.63	5.92	12.59	0.25	2.33		26-03-2013	30	15
2735.61	ML-49	Ol-4b	44.8235	40.1241	0.0521	13.6103	0.3582	0.1622	46.5384	0.2377	101.083		0.99187	0.00101827	0.281366	0.00712229	0.00339615	1.71502	0.0062956	3.00609	85.9062		0.25	39.38	0.63	5.54	13.55	0.25	2.39		26-03-2013	30	15
2735.61	ML-49	Ol-4b	49.8035	40.2032	0.059	13.5336	0.3022	0.2128	46.459	0.2338	101.004		0.993913	0.00115323	0.279807	0.00600933	0.004456	1.71225	0.00619284	3.00378	85.9539		0.25	34.68	0.63	6.54	10.23	0.25	2.41		26-03-2013	30	15
2735.61	ML-49	Ol-4b	54.7835	40.0153	0.0949	13.5432	0.3212	0.213	46.469	0.2408	100.897		0.990767	0.00185775	0.280429	0.00639684	0.00446695	1.71521	0.00638793	3.00552	85.9479		0.25	21.93	0.63	6.2	10.65	0.25	2.34		26-03-2013	30	15
2735.61	ML-49	Ol-4b	59.7635	40.0153	0.0726	13.5719	0.32	0.2294	46.5285	0.2441	100.982		0.990299	0.00142054	0.280892	0.00636993	0.00480861	1.7166	0.00647241	3.00686	85.9378		0.25	27.67	0.63	6.14	9.69	0.25	2.32		26-03-2013	30	15
2735.61	ML-49	Ol-4b	64.7435	40.0746	0.0517	13.5432	0.3465	0.196	46.6277	0.2418	101.082		0.990643	0.00101045	0.279979	0.00688962	0.00410383	1.71831	0.00640415	3.00734	85.989		0.25	39.33	0.63	5.71	11.37	0.25	2.34		26-03-2013	30	15
2735.61	ML-49	Ol-4b	69.7235	40.0252	0.0696	13.6198	0.3193	0.1993	46.5087	0.2392	100.981		0.990594	0.00136191	0.281897	0.00635632	0.00417788	1.71595	0.00634281	3.00668	85.89		0.25	29.57	0.63	6.21	11	0.25	2.37		26-03-2013	30	15
2735.61	ML-49	Ol-4b	74.7035	39.9856	0.0767	13.6294	0.347	0.1856	46.5087	0.2318	100.965		0.989931	0.00150132	0.282185	0.00690994	0.00389193	1.7165	0.00614854	3.00707	85.8815		0.25	26.25	0.63	5.67	12.23	0.25	2.44		26-03-2013	30	15
2735.61	ML-49	Ol-4b	79.6835	39.9164	0.0611	13.5719	0.3328	0.2141	46.5483	0.2359	100.881		0.989118	0.00119705	0.281252	0.00663322	0.00449365	1.71953	0.006263	3.00849	85.9429		0.25	34.54	0.63	5.86	10.4	0.25	2.4		26-03-2013	30	15
2735.61	ML-49	Ol-4b	84.6635	40.045	0.0592	13.4474	0.3256	0.1936	46.4491	0.2379	100.758		0.99243	0.00115998	0.278707	0.00649053	0.0040639	1.71608	0.0063169	3.00525	86.0283		0.25	34.88	0.63	6.11	11.27	0.25	2.37		26-03-2013	30	15
2735.61	ML-49	Ol-4b	89.6435	39.9164	0.0947	13.5432	0.3232	0.1833	46.3102	0.2373	100.608		0.991154	0.00185916	0.281234	0.00645514	0.00385512	1.71426	0.00631314	3.00513	85.9065		0.25	22.3	0.63	6.12	11.85	0.25	2.38		26-03-2013	30	15
2735.61	ML-49	Ol-4b	94.6235	39.9065	0.0634	13.6581	0.3386	0.2074	46.4987	0.2459	100.919		0.988913	0.00124216	0.28305	0.00674909	0.0043532	1.71777	0.00652876	3.0086	85.8533		0.25	32.88	0.63	5.83	10.66	0.25	2.3		26-03-2013	30	15
2735.61	ML-49	Ol-4b	99.6035	40.0351	0.0916	13.6007	0.3389	0.1859	46.3598	0.2423	100.854		0.99181	0.00179415	0.281776	0.0067531	0.00390079	1.71214	0.0064313	3.0046	85.8682		0.25	22.08	0.63	5.82	12.05	0.25	2.33		26-03-2013	30	15
2735.61	ML-49	Ol-4b	104.583	40.1142	0.0708	13.5432	0.3378	0.2033	46.4293	0.2371	100.936		0.992708	0.00138526	0.280286	0.00672399	0.00426135	1.71287	0.00628656	3.00452	85.9376		0.25	28.89	0.63	5.85	10.87	0.25	2.39		26-03-2013	30	15
2735.61	ML-49	Ol-4b	109.563	40.0647	0.0903	13.4474	0.363	0.1833	46.5087	0.2385	100.896		0.991543	0.0017669	0.27832	0.00722603	0.00384236	1.7159	0.00632405	3.00492	86.0437		0.25	23.13	0.63	5.41	12.26	0.25	2.35		26-03-2013	30	15
2735.61	ML-49	Ol-4b	114.543	40.0647	0.0869	13.5528	0.3232	0.2104	46.4094	0.2424	100.89		0.99199	0.00170114	0.280627	0.00643666	0.00441242	1.71301	0.00643036	3.00461	85.9239		0.25	24.12	0.63	6.03	10.61	0.25	2.33		26-03-2013	30	15
2735.61	ML-49	Ol-4b	119.523	40.0746	0.069	13.5911	0.3245	0.1958	46.4987	0.2449	100.999		0.991414	0.00134962	0.281188	0.0064572	0.00410283	1.71489	0.0064913	3.00589	85.913		0.25	29.87	0.63	6.06	11.45	0.25	2.31		26-03-2013	30	15
2735.61	ML-49	Ol-7a	0	39.5208	0.0333	17.6138	0.186	0.2567	43.3439	0.2884	101.243		0.993344	0.00066175	0.370241	0.00376038	0.00546495	1.62409	0.00776653	3.00533	81.4354		0.25	57.77	0.55	10.01	9.13	0.26	2.06		26-03-2013	30	15
2735.61	ML-49	Ol-7a	7.01038	39.4219	0.0226	17.0392	0.2575	0.227	43.6515	0.2645	100.884		0.992346	0.00044979	0.358699	0.00521371	0.00483991	1.63807	0.00713361	3.00675	82.0361		0.25	86.53	0.56	7.23	10.23	0.26	2.2		26-03-2013	30	15
2735.61	ML-49	Ol-7a	14.0104	39.6395	0.0288	16.8572	0.289	0.214	43.9392	0.2556	101.223		0.993251	0.000570557	0.353242	0.0058247	0.00454183	1.64131	0.00686199	3.00561	82.2897		0.25	69.18	0.56	6.62	10.68	0.26	2.25		26-03-2013	30	15
2735.61	ML-49	Ol-7a	21.0104	39.5702	0.052	17.4031	0.2829	0.2023	43.5622	0.2551	101.328		0.992787	0.00103149	0.36515	0.00570906	0.00429902	1.62932	0.00685734	3.00515	81.6919		0.25	36.74	0.55	6.86	11.59	0.26	2.27		26-03-2013	30	15
2735.61	ML-49	Ol-7a	28.0104	39.3428	0.0158	17.882	0.3184	0.2822	43.0562	0.2389	101.136		0.992156	0.000315027	0.377127	0.00645851	0.00602779	1.61867	0.00645489	3.00721	81.104		0.26	127.89	0.54	6.13	8.53	0.26	2.39		26-03-2013	30	15
2735.61	ML-49	Ol-7a	35.0104	39.3625	0.0355	18.7153	0.3062	0.2834	42.709	0.2312	101.643		0.991102	0.000706707	0.394083	0.00620133	0.00604395	1.60311	0.00623707	3.00748	80.2681		0.26	55.04	0.53	6.57	8.72	0.26	2.46		26-03-2013	30	15
2735.61	ML-49	Ol-7a	42.0104	39.234	0.015	19.0601	0.2876	0.2345	42.0344	0.224	101.09		0.994672	0.000300666	0.40411	0.00586476	0.00503554	1.58866	0.00608448	3.00473	79.7212		0.26	128.92	0.53	6.93	10.27	0.26	2.52		26-03-2013	30	15
2735.61	ML-49	Ol-7a	49.0104	39.3428	0.0045	19.3379	0.3006	0.2367	41.8955	0.2316	101.35		0.995925	9.00637e-05	0.40938	0.00612061	0.00507512	1.58102	0.00628143	3.00389	79.4323		0.26	442.88	0.52	6.58	9.8	0.27	2.44		26-03-2013	30	15
2735.61	ML-49	Ol-7a	56.0104	39.145	0.0114	19.539	0.3021	0.2799	41.7566	0.2258	101.26		0.993348	0.000228721	0.414652	0.00616624	0.00601609	1.57964	0.00613914	3.00619	79.2081		0.26	164.91	0.52	6.49	8.55	0.27	2.5		26-03-2013	30	15
2735.61	ML-49	Ol-7a	63.0104	39.1351	0	19.5869	0.345	0.2613	41.8062	0.2205	101.355		0.992592	0	0.415457	0.0070383	0.00561345	1.58072	0.00599199	3.00741	79.1873		0.26	300	0.52	5.78	9.06	0.27	2.54		26-03-2013	30	15
2735.61	ML-49	Ol-7a	70.0104	38.9274	0.0247	19.5103	0.3129	0.2576	41.7963	0.2344	101.064		0.990147	0.000496726	0.415015	0.00640168	0.00554979	1.58486	0.00638793	3.00886	79.2479		0.26	81.33	0.52	6.33	9.4	0.27	2.41		26-03-2013	30	15
2735.61	ML-49	Ol-7a	77.0104	39.1153	0.0151	19.3953	0.2901	0.2683	41.8459	0.2221	101.152		0.99298	0.000303072	0.411763	0.0059236	0.005769	1.58364	0.00604088	3.00641	79.3644		0.26	126.16	0.52	6.82	8.99	0.27	2.54		26-03-2013	30	15
2735.61	ML-49	Ol-7a	84.0104	39.0559	0.0366	19.3187	0.3231	0.2863	41.8558	0.2301	101.107		0.991893	0.00073491	0.41031	0.00660022	0.00615864	1.58468	0.00626112	3.00664	79.433		0.26	53.13	0.52	6.18	8.29	0.27	2.45		26-03-2013	30	15
2735.61	ML-49	Ol-7a	91.0104	39.1054	0.0211	19.175	0.3303	0.2574	41.8459	0.2283	100.963		0.993738	0.000423929	0.4075	0.0067513	0.00554025	1.58525	0.00621582	3.00541	79.5508		0.26	88.56	0.52	6.05	9.05	0.27	2.46		26-03-2013	30	15
2735.61	ML-49	Ol-7a	98.0104	39.0461	0.0245	19.2038	0.3015	0.2865	41.9947	0.2261	101.083		0.991383	0.00049182	0.407762	0.00615738	0.00616134	1.58953	0.00615067	3.00763	79.5842		0.26	80.79	0.52	6.52	8.34	0.26	2.48		26-03-2013	30	15
2735.61	ML-49	Ol-7a	105.01	39.1252	0.0079	19.0793	0.3302	0.2213	42.0641	0.2213	101.049		0.992882	0.000158505	0.404911	0.00674004	0.00475673	1.59134	0.00601701	3.0068	79.7164		0.26	245.4	0.53	6.04	10.68	0.26	2.53		26-03-2013	30	15
2735.61	ML-49	Ol-7a	112.01	39.145	0.0232	19.0218	0.3429	0.2506	42.2725	0.2196	101.276		0.991048	0.000464389	0.402741	0.00698281	0.00537385	1.59546	0.00595674	3.00802	79.8448		0.25	68.32	0.53	6.74	8.95	0.27	2.52		26-03-2013	30	15
2735.61	ML-49	Ol-7a	119.01	39.2537	0.0055	19.108	0.3144	0.2393	42.3221	0.2133	101.456		0.992029	0.000109896	0.403845	0.00639101	0.00512238	1.59448	0.00577553	3.00775	79.7908		0.26	80.94	0.53	5.81	9.58	0.26	2.54		26-03-2013	30	15
2735.61	ML-49	Ol-7a	126.01	38.1164	0.0245	19.1272	0.3361	0.2464	41.449	0.2211	99.5207		0.984962	0.000500552	0.413346	0.00698586	0.00539305	1.59673	0.00612145	3.01404	79.4363		0.26	359.56	0.52	6.29	9.86	0.26	2.62		26-03-2013	30	15
2735.61	ML-49	Ol-7a	133.01	39.0856	0	19.0026	0.3183	0.2366	42.203	0.2107	101.057		0.991644	0	0.403189	0.0064956	0.0050844	1.59621	0.00572745	3.00836	79.8345		0.26	300	0.53	6.27	10.12	0.26	2.63		26-03-2013	30	15
2735.61	ML-49	Ol-7a	140.01	39.0263	0.0383	18.8781	0.2988	0.2692	42.1138	0.218	100.842		0.991682	0.000769466	0.401172	0.00610717	0.00579397	1.59532	0.00593512	3.00678	79.9062		0.26	49.94	0.53	6.67	8.88	0.26	2.56		26-03-2013	30	15
2735.61	ML-49	Ol-7a	147.01	39.1746	0.021	18.9356	0.3226	0.2602	42.2626	0.2208	101.197		0.992048	0.000420458	0.401017	0.00657107	0.00558111	1.59548	0.0059908	3.00711	79.914		0.26	95.46	0.53	6.2	9.01	0.26	2.52		26-03-2013	30	15
2735.61	ML-49	Ol-7a	154.01	39.1153	0.0301	18.9548	0.3637	0.2605	42.3419	0.2294	101.296		0.990045	0.000602352	0.40122	0.0074045	0.00558473	1.59767	0.00622099	3.00875	79.9279		0.26	65.4	0.53	5.53	9.19	0.26	2.45		26-03-2013	30	15
2735.61	ML-49	Ol-7a	161.01	38.8581	0.0325	18.8494	0.3262	0.2349	42.0641	0.2094	100.575		0.99033	0.000654873	0.401746	0.00668692	0.00507069	1.59815	0.00571784	3.00836	79.9117		0.26	59.73	0.53	6.09	9.82	0.26	2.66		26-03-2013	30	15
2735.61	ML-49	Ol-7a	168.01	38.9274	0	18.7345	0.3204	0.2233	41.9352	0.2202	100.361		0.99355	0	0.399882	0.00657766	0.00482735	1.59559	0.00602157	3.00645	79.9605		0.26	300	0.53	6.19	10.36	0.26	2.54		26-03-2013	30	15
2735.61	ML-49	Ol-7a	175.01	38.868	0.0343	18.7824	0.3099	0.2404	41.9352	0.2135	100.384		0.992025	0.000692149	0.4009	0.00636203	0.00519697	1.59558	0.00583829	3.00659	79.9196		0.26	56.93	0.53	6.33	9.73	0.26	2.59		26-03-2013	30	15
2735.61	ML-49	Ol-7a	182.01	38.9175	0.0142	18.7632	0.3612	0.2478	42.0046	0.2137	100.522		0.992107	0.000286205	0.400015	0.00740637	0.00535058	1.59632	0.00583682	3.00732	79.9625		0.26	134.78	0.53	5.54	9.4	0.26	2.59		26-03-2013	30	15
2735.61	ML-49	Ol-7a	189.01	38.7988	0.0246	18.6866	0.299	0.2506	41.7864	0.2138	100.06		0.993194	0.000497882	0.400038	0.00615646	0.00543354	1.59463	0.00586383	3.00581	79.9446		0.26	77.66	0.53	6.53	9.34	0.26	2.57		26-03-2013	30	15
2735.61	ML-49	Ol-7b	0	39.1845	0.0344	17.3457	0.2086	0.268	42.8777	0.2796	100.198		0.994712	0.000690425	0.368239	0.00425933	0.0057624	1.62264	0.00760462	3.00391	81.5037		0.25	56.64	0.55	8.98	8.67	0.26	2.1		26-03-2013	30	15
2735.61	ML-49	Ol-7b	4.98344	39.3526	0.0331	17.1445	0.2019	0.2376	43.6118	0.2735	100.855		0.991294	0.000659222	0.361168	0.0040908	0.00506945	1.63772	0.00738148	3.00739	81.9316		0.25	58.37	0.55	9.38	9.85	0.26	2.13		26-03-2013	30	15
2735.61	ML-49	Ol-7b	9.98344	39.4812	0.0495	16.7518	0.2164	0.2444	43.6217	0.2687	100.634		0.994566	0.000985879	0.352908	0.00438474	0.00521471	1.63815	0.00725217	3.00346	82.2754		0.25	39.21	0.56	8.68	9.46	0.26	2.16		26-03-2013	30	15
2735.61	ML-49	Ol-7b	14.9834	39.3428	0.0369	16.9051	0.2842	0.2053	43.3042	0.259	100.337		0.995094	0.000737906	0.357579	0.00578186	0.00439819	1.63282	0.0070187	3.00343	82.0348		0.25	53.6	0.56	6.78	10.97	0.26	2.22		26-03-2013	30	15
2735.61	ML-49	Ol-7b	19.9834	39.1252	0.0234	17.3169	0.2401	0.2606	42.9769	0.2449	100.188		0.993451	0.000469766	0.36772	0.00490373	0.00560468	1.6268	0.00666249	3.00561	81.5635		0.25	81.73	0.55	8	8.9	0.26	2.32		26-03-2013	30	15
2735.61	ML-49	Ol-7b	24.9834	39.1647	0.0195	17.7671	0.3103	0.2177	42.7685	0.2421	100.49		0.993492	0.000391092	0.376913	0.00633133	0.00467749	1.61734	0.00657993	3.00573	81.1001		0.25	102.87	0.54	6.29	10.59	0.26	2.34		26-03-2013	30	15
2735.61	ML-49	Ol-7b	29.9834	39.0856	0.0374	18.2651	0.3108	0.2883	42.4312	0.2391	100.658		0.992398	0.000750786	0.387836	0.00634737	0.00620011	1.60606	0.00650438	3.0061	80.5489		0.26	51.99	0.54	6.32	8.47	0.26	2.35		26-03-2013	30	15
2735.61	ML-49	Ol-7b	34.9834	38.957	0.0378	18.7632	0.3365	0.2582	42.203	0.2407	100.796		0.990283	0.000759698	0.398874	0.00688022	0.00555924	1.59928	0.00655552	3.0082	80.0379		0.26	51.64	0.53	5.95	8.94	0.26	2.36		26-03-2013	30	15
2735.61	ML-49	Ol-7b	39.9834	39.1153	0.0289	19.1463	0.3329	0.2424	41.8062	0.2378	100.91		0.994276	0.000580809	0.407007	0.00680641	0.0052189	1.5842	0.00647634	3.00456	79.5598		0.26	64.88	0.52	5.92	9.6	0.27	2.37		26-03-2013	30	15
2735.61	ML-49	Ol-7b	44.9834	38.9175	0.011	19.2708	0.3156	0.2567	41.7169	0.2264	100.715		0.992281	0.000221747	0.410909	0.00647248	0.00554372	1.58566	0.00618478	3.00728	79.4193		0.26	166.85	0.52	6.26	9.1	0.27	2.49		26-03-2013	30	15
2735.61	ML-49	Ol-7b	49.9834	38.9867	0	19.3379	0.317	0.2644	41.4887	0.2295	100.624		0.995066	0	0.412762	0.00650786	0.00571587	1.57861	0.00627589	3.00493	79.2724		0.26	300	0.52	6.15	8.85	0.27	2.44		26-03-2013	30	15
2735.61	ML-49	Ol-7b	54.9834	38.8384	0.0344	19.4624	0.3307	0.2486	41.6276	0.2266	100.769		0.990707	0.000693774	0.41518	0.00678519	0.0053712	1.58298	0.00619301	3.00791	79.2219		0.26	57.01	0.52	5.97	9.38	0.27	2.46		26-03-2013	30	15
2735.61	ML-49	Ol-7b	59.9834	38.9373	0.0391	19.3858	0.3183	0.2542	41.578	0.2302	100.743		0.992789	0.000788213	0.413362	0.00652788	0.00548975	1.58039	0.00628861	3.00563	79.2671		0.26	47.95	0.52	6.28	9.44	0.27	2.44		26-03-2013	30	15
2735.61	ML-49	Ol-7b	64.9834	38.9175	0.0277	19.4624	0.3196	0.237	41.5681	0.2263	100.759		0.992506	0.000558526	0.415088	0.006556	0.00511944	1.58036	0.00618345	3.00638	79.1983		0.26	67.24	0.52	6.17	9.87	0.27	2.47		26-03-2013	30	15
2735.61	ML-49	Ol-7b	69.9834	38.6999	0.0058	19.1846	0.3298	0.2541	41.4094	0.2205	100.104		0.992905	0.000117653	0.41163	0.00680601	0.0055219	1.58382	0.00606128	3.00686	79.3715		0.26	325.47	0.52	6.04	9.27	0.27	2.51		26-03-2013	30	15
2735.61	ML-49	Ol-7b	74.9834	38.4922	0.0116	19.108	0.3267	0.2277	41.2308	0.2118	99.6088		0.992453	0.000236467	0.412011	0.00677533	0.00497263	1.58477	0.00585087	3.00707	79.3663		0.26	162.57	0.52	5.95	10.23	0.27	2.61		26-03-2013	30	15
2735.61	ML-49	Ol-7b	79.9834	38.4625	0.0362	19.175	0.3169	0.2332	41.2209	0.2218	99.6666		0.991383	0.000737713	0.413329	0.00657006	0.00509117	1.58391	0.00612523	3.00714	79.3049		0.26	53.48	0.52	6.06	9.97	0.27	2.49		26-03-2013	30	15
2735.61	ML-49	Ol-7b	84.9834	38.779	0.0175	19.357	0.3169	0.247	41.3995	0.2266	100.344		0.992989	0.000354292	0.414517	0.006527	0.00535711	1.58034	0.00621678	3.0063	79.2207		0.26	106.16	0.52	6.23	9.2	0.27	2.46		26-03-2013	30	15
2735.61	ML-49	Ol-7b	89.9834	38.868	0.0247	19.1846	0.3097	0.2272	41.4689	0.2241	100.307		0.994446	0.000499644	0.410486	0.00637344	0.0049236	1.58168	0.00614311	3.00455	79.395		0.26	75.37	0.52	6.38	10.39	0.27	2.49		26-03-2013	30	15
2735.61	ML-49	Ol-7b	94.9834	38.7691	0.0505	19.1942	0.3237	0.2507	41.5086	0.2194	100.316		0.99219	0.00102182	0.410804	0.00666339	0.00543437	1.58364	0.00601594	3.00577	79.4025		0.26	37.49	0.52	6.06	9.44	0.27	2.53		26-03-2013	30	15
2735.61	ML-49	Ol-7b	99.9834	38.9274	0.0241	19.2325	0.321	0.2254	41.6673	0.2223	100.62		0.99305	0.000486081	0.410306	0.00658666	0.0048703	1.5846	0.00607594	3.00598	79.4323		0.26	81.7	0.52	6.19	10.35	0.27	2.5		26-03-2013	30	15
2735.61	ML-49	Ol-7b	104.983	39.0559	0.0208	19.2229	0.3038	0.2559	41.7169	0.2186	100.795		0.99428	0.000418659	0.409258	0.0062209	0.00551795	1.58322	0.00596251	3.00488	79.4599		0.26	91.39	0.52	6.47	9.24	0.27	2.56		26-03-2013	30	15
2735.61	ML-49	Ol-7b	109.983	38.9867	0.0351	19.3953	0.311	0.2287	41.826	0.2243	101.007		0.991312	0.000705628	0.412427	0.0063606	0.00492545	1.58544	0.00611055	3.00728	79.3566		0.26	55.17	0.52	6.29	10.51	0.27	2.5		26-03-2013	30	15
2735.61	ML-49	Ol-7b	114.983	38.9867	0.0342	19.2517	0.3288	0.2426	41.6375	0.2199	100.701		0.993724	0.000689209	0.410368	0.00674101	0.00523752	1.58213	0.00600526	3.0049	79.4044		0.26	52.83	0.52	6.06	9.77	0.27	2.54		26-03-2013	30	15
2735.61	ML-49	Ol-7b	119.983	39.1548	0.0054	19.2517	0.3227	0.2216	41.9252	0.2169	101.098		0.993761	0.000108359	0.408621	0.00658778	0.00476378	1.58628	0.00589812	3.00602	79.5168		0.26	366.57	0.52	6.14	10.74	0.26	2.57		26-03-2013	30	15
2735.61	ML-49	Ol-7b	124.983	39.0757	0.0002	19.3474	0.3415	0.252	41.9947	0.2243	101.236		0.991364	4.01173e-06	0.410493	0.00696884	0.00541517	1.58829	0.00609695	3.00863	79.4628		0.26	8341.95	0.52	5.86	9.32	0.26	2.48		26-03-2013	30	15
2735.61	ML-49	Ol-7b	129.983	39.2241	0.029	19.1942	0.3412	0.2442	41.7963	0.2171	101.046		0.995591	0.000581972	0.407431	0.00696597	0.00525001	1.58152	0.00590399	3.00324	79.5153		0.26	62.51	0.52	5.87	9.55	0.27	2.57		26-03-2013	30	15
2735.61	ML-49	Ol-7b	134.983	39.1351	0.0238	19.2517	0.3216	0.2356	41.8657	0.223	101.056		0.993682	0.000477786	0.408795	0.00656812	0.0050669	1.58471	0.00606658	3.00536	79.4936		0.26	79.59	0.52	6.15	10.04	0.27	2.52		26-03-2013	30	15
2735.61	ML-49	Ol-7b	139.983	39.145	0.0471	19.2038	0.3191	0.2658	41.7864	0.222	100.989		0.994317	0.000945901	0.407936	0.00651958	0.0057186	1.58231	0.00604171	3.00379	79.5033		0.26	40.34	0.52	6.16	9.1	0.27	2.52		26-03-2013	30	15
2735.61	ML-49	Ol-7b	144.983	39.0658	0.0113	19.3283	0.3257	0.1972	42.0443	0.2251	101.198		0.991074	0.000226654	0.41007	0.00664616	0.00423742	1.5901	0.00611846	3.00847	79.4982		0.26	169.99	0.52	6.03	11.72	0.26	2.5		26-03-2013	30	15
2735.61	ML-49	Ol-7b	149.983	39.1647	0.0232	19.1942	0.3521	0.2722	41.8459	0.2303	101.083		0.99416	0.000465612	0.407462	0.00718904	0.00585241	1.58352	0.00626344	3.00491	79.5346		0.26	83.24	0.52	5.63	8.83	0.27	2.43		26-03-2013	30	15
2735.61	ML-49	Ol-7b	154.983	39.0757	0.01	19.1942	0.326	0.2235	41.9352	0.2183	100.983		0.992854	0.000200888	0.407854	0.00666254	0.00480996	1.58842	0.00594278	3.00674	79.5692		0.26	198.98	0.52	6.01	10.32	0.26	2.57		26-03-2013	30	15
2735.61	ML-49	Ol-7b	159.983	39.1351	0.0011	19.2134	0.301	0.2572	41.9947	0.2242	101.127		0.992992	2.20672e-05	0.407699	0.00614314	0.0055276	1.58848	0.00609499	3.00696	79.5761		0.26	1697.92	0.52	6.67	9.21	0.26	2.5		26-03-2013	30	15
2735.61	ML-49	OL-Cl-2-1	0	39.412	0.0277	17.9395	0.1859	0.273	43.0165	0.3055	101.16		0.993197	0.000551902	0.378071	0.00376817	0.00582714	1.61604	0.00824852	3.0057	81.0406		0.25	73.26	0.54	9.88	8.58	0.26	1.98		26-03-2013	30	15
2735.61	ML-49	OL-Cl-2-1	5.01199	39.3823	0.0383	17.1924	0.2136	0.2247	43.3539	0.2703	100.675		0.993779	0.000764122	0.362812	0.00433545	0.00480261	1.63089	0.0073079	3.00469	81.8021		0.25	55.02	0.55	8.74	10.36	0.26	2.16		26-03-2013	30	15
2735.61	ML-49	OL-Cl-2-1	10.012	39.6098	0.062	16.7327	0.1939	0.2178	43.7804	0.2675	100.864		0.994888	0.00123123	0.351474	0.00391736	0.00463356	1.63931	0.00719868	3.00265	82.3449		0.25	31.91	0.56	9.57	10.67	0.26	2.17		26-03-2013	30	15
2735.61	ML-49	OL-Cl-2-1	15.012	39.6098	0.0493	16.1388	0.2618	0.1824	44.6237	0.2475	101.113		0.990326	0.000974536	0.337446	0.00526489	0.00386266	1.66322	0.00662992	3.00772	83.1333		0.25	39.67	0.57	7.24	12.37	0.25	2.3		26-03-2013	30	15
2735.61	ML-49	OL-Cl-2-1	20.012	39.857	0.046	15.114	0.3169	0.2357	45.1297	0.2629	100.962		0.993466	0.000906528	0.315053	0.00635352	0.00497615	1.67694	0.00702096	3.00472	84.1841		0.25	44.03	0.59	6.06	9.87	0.25	2.19		26-03-2013	30	15
2735.61	ML-49	OL-Cl-2-1	25.012	39.8966	0.0629	14.8075	0.314	0.2021	45.4273	0.2505	100.961		0.992828	0.00123755	0.30816	0.00628509	0.00425981	1.68525	0.00667888	3.0047	84.541		0.25	30.05	0.6	6.2	11.14	0.25	2.29		26-03-2013	30	15
2735.61	ML-49	OL-Cl-2-1	30.012	39.8867	0.0444	14.6542	0.3053	0.2038	45.2289	0.2611	100.584		0.995566	0.000876194	0.305887	0.00612933	0.00430856	1.68293	0.00698243	3.00268	84.6196		0.25	43.59	0.6	6.41	11.2	0.25	2.2		26-03-2013	30	15
2735.61	ML-49	OL-Cl-2-1	35.012	39.946	0.0365	14.5872	0.3002	0.2073	45.3876	0.257	100.722		0.99534	0.000719061	0.303966	0.00601661	0.00437504	1.68594	0.00686101	3.00322	84.7246		0.25	55.35	0.6	6.43	10.96	0.25	2.23		26-03-2013	30	15
2735.61	ML-49	OL-Cl-2-1	40.012	39.9362	0.0466	14.6447	0.308	0.2104	45.2586	0.2623	100.667		0.995871	0.000918752	0.305403	0.00617777	0.00444394	1.68247	0.00700798	3.00229	84.6367		0.25	41.63	0.6	6.37	10.78	0.25	2.18		26-03-2013	30	15
2735.61	ML-49	OL-Cl-2-1	45.012	40.0252	0.0237	14.5585	0.3213	0.2529	45.5364	0.253	100.971		0.994974	0.000465803	0.302657	0.00642441	0.00532492	1.68751	0.0067384	3.00409	84.7924		0.25	86.77	0.6	6.11	9.25	0.25	2.27		26-03-2013	30	15
2735.61	ML-49	OL-Cl-2-1	50.012	39.946	0.0404	14.6734	0.3106	0.1704	45.338	0.2556	100.734		0.995445	0.000795976	0.305795	0.00622571	0.00359665	1.68428	0.00682436	3.00296	84.634		0.25	48.94	0.6	6.32	13.34	0.25	2.25		26-03-2013	30	15
2735.61	ML-49	OL-Cl-2-1	55.012	39.9658	0.0392	14.6351	0.2986	0.2169	45.4174	0.2517	100.825		0.995017	0.000771619	0.304715	0.00597964	0.0045739	1.68567	0.00671402	3.00344	84.6907		0.25	49.79	0.6	6.48	10.69	0.25	2.28		26-03-2013	30	15
2735.61	ML-49	OL-Cl-2-1	60.012	40.0548	0.0264	14.6255	0.3124	0.185	45.5662	0.2507	101.021		0.995099	0.00051855	0.303864	0.00624261	0.00389286	1.68757	0.00667304	3.00386	84.7415		0.25	74.17	0.6	6.36	11.97	0.25	2.27		26-03-2013	30	15
2735.61	ML-49	OL-Cl-2-1	65.012	39.9559	0.0376	14.5297	0.3173	0.2366	45.2785	0.2493	100.605		0.996567	0.000741461	0.303067	0.0063656	0.00499834	1.68355	0.00666201	3.00195	84.7445		0.25	52.72	0.6	6.18	9.49	0.25	2.29		26-03-2013	30	15
2735.61	ML-49	OL-Cl-2-1	70.012	40.0054	0.0686	14.6447	0.3326	0.2044	45.3082	0.2517	100.816		0.995934	0.00135024	0.304893	0.00666006	0.00431001	1.6815	0.00671356	3.00137	84.6509		0.25	27.7	0.6	5.95	11.2	0.25	2.28		26-03-2013	30	15
2735.61	ML-49	OL-Cl-2-1	75.012	39.9856	0.0532	14.5776	0.3322	0.2197	45.4868	0.2463	100.901		0.99457	0.00104621	0.303232	0.00664622	0.00462857	1.68665	0.00656377	3.00334	84.7613		0.25	38.28	0.6	5.86	10.51	0.25	2.33		26-03-2013	30	15
2735.61	ML-49	OL-Cl-2-1	80.012	39.8867	0.0259	14.7117	0.3197	0.2128	45.3678	0.2533	100.778		0.994189	0.000510406	0.306662	0.00640954	0.0044926	1.68576	0.00676446	3.00479	84.6086		0.25	74.85	0.6	6.07	10.49	0.25	2.26		26-03-2013	30	15
2735.61	ML-49	OL-Cl-2-1	85.012	39.9263	0.0617	14.6255	0.3142	0.2122	45.586	0.2542	100.98		0.992618	0.00121279	0.304082	0.00628309	0.00446843	1.68952	0.00677106	3.00496	84.7471		0.25	33.06	0.6	6.23	10.55	0.25	2.26		26-03-2013	30	15
2735.61	ML-49	OL-Cl-2-1	90.012	40.0548	0.0398	14.6255	0.326	0.2093	45.4074	0.248	100.911		0.99619	0.00078261	0.304197	0.00652152	0.00440902	1.68354	0.0066084	3.00225	84.6963		0.25	50.92	0.6	6.01	10.68	0.25	2.31		26-03-2013	30	15
2735.61	ML-49	OL-Cl-2-1	95.012	40.0944	0.0652	14.7692	0.2853	0.221	45.2785	0.2445	100.958		0.996921	0.00128174	0.307107	0.00570588	0.00465431	1.67833	0.00651349	3.00052	84.532		0.25	30.12	0.6	6.79	10.2	0.25	2.33		26-03-2013	30	15
2735.61	ML-49	Ol-8	0	38.8633	0.010388	17.9519	0.179378	0.236673	41.0924	0.425599	98.934		1.00008	0.00021135	0.386333	0.00371286	0.00515858	1.5764	0.0117342	2.98892	80.3165		0.213544	159.996	0.428738	11.3134	6.06508	0.185577	3.32612		17-03-2014	30	15
2735.61	ML-49	Ol-8	6.11	38.9336	0.026723	16.8523	0.216571	0.230238	42.7153	0.258936	99.2639		0.995389	0.000540168	0.360316	0.00445361	0.00498576	1.62802	0.00709281	3.00171	81.8785		0.213732	58.1522	0.443724	9.64031	6.18665	0.181346	4.76267		17-03-2014	30	15
2735.61	ML-49	Ol-8	12.22	39.218	0.047476	16.3686	0.199734	0.232753	43.2776	0.248002	99.6329		0.995875	0.000953167	0.347606	0.00407958	0.00500611	1.63829	0.00674734	2.99978	82.4963		0.213003	33.6769	0.450209	10.4558	5.95614	0.179919	4.9886		17-03-2014	30	15
2735.61	ML-49	Ol-8	18.33	39.6297	0.070576	15.0304	0.243962	0.20502	44.4286	0.256248	99.9009		0.99696	0.00140375	0.316216	0.00493655	0.00436857	1.6662	0.00690677	2.99807	84.049		0.211781	23.8788	0.470883	8.86751	6.73467	0.176678	4.71376		17-03-2014	30	15
2735.61	ML-49	Ol-8	24.44	39.6885	0.086096	13.6007	0.335623	0.178927	45.5167	0.223685	99.6705		0.994615	0.00170588	0.285041	0.00676528	0.00379797	1.70047	0.006006	2.99959	85.644		0.211877	19.0883	0.496043	6.53971	7.47989	0.173762	5.32574		17-03-2014	30	15
2735.61	ML-49	Ol-8	30.55	39.7984	0.057121	12.753	0.355176	0.158672	46.182	0.203104	99.5555		0.99464	0.00112868	0.266544	0.00713983	0.00335882	1.72061	0.00543847	3.00027	86.5866		0.21159	28.4434	0.512474	6.27166	8.32513	0.172029	5.85787		17-03-2014	30	15
2735.61	ML-49	Ol-8	36.66	39.9149	0.129548	12.2238	0.351611	0.167411	46.5429	0.227259	99.594		0.994506	0.00255199	0.254703	0.00704658	0.00353299	1.72876	0.00606668	2.99824	87.1586		0.211206	13.1045	0.52436	6.35612	7.98964	0.170997	5.26095		17-03-2014	30	15
2735.61	ML-49	Ol-8	42.77	39.9942	0.087082	11.9009	0.360903	0.169884	46.763	0.223357	99.5294		0.995872	0.00171439	0.247823	0.00722838	0.00358298	1.73587	0.00595887	2.99893	87.507		0.211141	19.3278	0.531676	6.18376	7.85111	0.170443	5.32956		17-03-2014	30	15
2735.61	ML-49	Ol-8	48.88	39.8154	0.079528	11.8173	0.394183	0.137832	46.8497	0.222505	99.3712		0.992842	0.00156792	0.246436	0.00790626	0.00291115	1.74158	0.00594465	3.0008	87.604		0.21154	21.2868	0.533234	5.62435	9.35126	0.170248	5.44551		17-03-2014	30	15
2735.61	ML-49	Ol-8	54.99	39.8905	0.114812	11.5449	0.382792	0.164352	47.0065	0.203145	99.3668		0.993166	0.00226003	0.24038	0.00766583	0.00346588	1.74469	0.00541896	2.9988	87.8906		0.211309	15.0719	0.540203	5.98079	7.90519	0.169796	5.73803		17-03-2014	30	15
2735.61	ML-49	Ol-8	61.1	40.119	0.088417	11.5481	0.448581	0.144168	47.0583	0.210042	99.6672		0.99585	0.00173522	0.239723	0.0089563	0.00303109	1.74136	0.00558608	2.99772	87.8994		0.210788	19.3425	0.539155	4.99398	8.93471	0.169722	5.55824		17-03-2014	30	15
2735.61	ML-49	Ol-8	67.21	40.0984	0.092301	11.308	0.373387	0.157559	47.1638	0.199538	99.45		0.996037	0.00181272	0.234904	0.00746022	0.00331495	1.74649	0.00531045	2.997	88.1445		0.21078	19.0895	0.545702	6.04864	8.27533	0.169351	5.81994		17-03-2014	30	15
2735.61	ML-49	Ol-8	73.32	39.9351	0.08869	11.2013	0.407538	0.149988	47.2461	0.200154	99.2641		0.994186	0.00174567	0.233205	0.00816065	0.00316268	1.75343	0.00533869	3.00026	88.2613		0.211298	19.5825	0.549326	5.55614	8.43582	0.169164	5.69546		17-03-2014	30	15
2735.61	ML-49	Ol-8	79.43	39.9551	0.095276	11.2128	0.392608	0.162156	47.3854	0.188809	99.4346		0.992925	0.00187199	0.233031	0.00784779	0.00341321	1.75549	0.00502718	3.00085	88.2812		0.211202	17.8502	0.548312	5.77923	8.0285	0.168901	6.18097		17-03-2014	30	15
2735.61	ML-49	Ol-8	85.54	39.941	0.094849	11.1171	0.391359	0.156695	47.2185	0.197827	99.1653		0.994642	0.00186748	0.231524	0.00783911	0.00330513	1.75295	0.00527826	2.99881	88.3332		0.211222	17.8613	0.551315	5.76235	8.23402	0.169193	5.8814		17-03-2014	30	15
2735.61	ML-49	Ol-8	91.65	39.9893	0.091425	11.1559	0.419134	0.126876	47.4672	0.206544	99.4921		0.993033	0.00179498	0.231676	0.00837176	0.00266861	1.7572	0.00549528	3.00129	88.3514		0.21116	18.6101	0.549662	5.55961	10.4841	0.168751	5.57048		17-03-2014	30	15
2735.61	ML-49	Ol-8	97.76	40.0046	0.088917	11.1482	0.415998	0.15252	47.4995	0.190751	99.5507		0.992675	0.00174444	0.231344	0.00830294	0.0032056	1.75709	0.00507132	3.0009	88.3655		0.211167	19.4801	0.550031	5.5106	8.64098	0.168747	6.04279		17-03-2014	30	15
2735.61	ML-49	Ol-8	103.87	40.1914	0.097315	11.1323	0.386073	0.149286	47.4592	0.204799	99.681		0.995178	0.00190512	0.23052	0.0076892	0.00313092	1.75185	0.00543317	2.99747	88.3715		0.210578	17.4805	0.550823	5.86531	8.65712	0.168689	5.7953		17-03-2014	30	15
2735.61	ML-49	Ol-8	109.98	40.1048	0.097939	11.0124	0.360307	0.169178	47.363	0.188644	99.3521		0.99583	0.00192274	0.228679	0.00719624	0.0035581	1.75322	0.00501868	2.99706	88.4616		0.210978	17.5023	0.553644	6.32055	7.68478	0.168893	6.16824		17-03-2014	30	15
2735.61	ML-49	Ol-8	116.09	40.069	0.099219	11.0489	0.424211	0.138956	47.3201	0.208978	99.3392		0.995844	0.00194963	0.229645	0.00848025	0.00292513	1.75322	0.00556469	2.99851	88.4185		0.21097	16.5755	0.55286	5.34312	9.28113	0.169029	5.54656		17-03-2014	30	15
2735.61	ML-49	Ol-8	122.2	40.2523	0.11661	10.9873	0.402302	0.189673	47.6851	0.219502	99.9232		0.993728	0.00227608	0.226842	0.00798864	0.00396614	1.75496	0.00580594	2.99762	88.5538		0.210493	14.8684	0.554598	5.68556	6.936	0.168321	5.32636		17-03-2014	30	15
2735.61	ML-49	Ol-8	128.31	40.2292	0.113609	11.1509	0.413128	0.147138	47.5256	0.202778	99.8223		0.995046	0.00222172	0.230658	0.00821921	0.00308257	1.75242	0.00537378	2.99818	88.3687		0.210551	15.3308	0.550752	5.5385	8.69638	0.168696	5.72412		17-03-2014	30	15
2735.61	ML-49	Ol-8	134.42	39.9332	0.099541	10.9682	0.417032	0.128133	47.3765	0.206546	99.1775		0.993744	0.00195847	0.228261	0.00834745	0.00270077	1.75757	0.005507	2.9995	88.5055		0.211452	17.6186	0.554492	5.37415	10.15	0.168863	5.63175		17-03-2014	30	15
2735.61	ML-49	Ol-8	140.53	40.191	0.072456	11.1243	0.403924	0.155137	47.5326	0.196975	99.7311		0.994965	0.00141817	0.230307	0.00804308	0.00325297	1.7542	0.00522454	2.99901	88.3947		0.210726	24.376	0.550938	5.61872	8.40116	0.168606	5.91739		17-03-2014	30	15
2735.61	ML-49	Ol-8	146.64	40.2284	0.087264	11.1271	0.396454	0.160911	47.6366	0.206654	99.8906		0.994351	0.00170537	0.230009	0.00788213	0.00336883	1.75532	0.00547279	2.99949	88.4146		0.210596	19.3635	0.549841	5.76614	8.07817	0.168433	5.74039		17-03-2014	30	15
2735.61	ML-49	Ol-8	152.75	40.1457	0.103223	11.0586	0.413682	0.153653	47.4413	0.194599	99.5555		0.995322	0.00202338	0.229288	0.00824964	0.00322665	1.75343	0.00516919	2.99802	88.4357		0.210873	16.4034	0.553247	5.50933	8.4687	0.168784	5.93929		17-03-2014	30	15
2735.61	ML-49	Ol-8	158.86	40.0046	0.100838	11.0191	0.420061	0.150139	47.4919	0.206321	99.443		0.993128	0.00197922	0.228769	0.00838787	0.003157	1.75761	0.00548778	2.99999	88.4831		0.211251	16.8126	0.553681	5.43481	8.6009	0.16867	5.61957		17-03-2014	30	15
2735.61	ML-49	Ol-20	0	38.8024	0.056328	18.3959	0.190544	0.228599	41.2342	0.302424	99.2495		0.998761	0.00114631	0.395986	0.00394495	0.00498383	1.58223	0.00834021	2.99658	79.9826		0.213665	27.8195	0.423345	10.7205	6.24379	0.185468	4.2992		17-03-2014	30	15
2735.61	ML-49	Ol-20	6.09235	38.8728	0.02751	17.0393	0.196793	0.224991	42.4644	-0.13042	98.7055		0.999237	0.000559099	0.366295	0.00406889	0.00489862	1.62726	-0.0035919	2.99903	81.626		0.21375	56.4166	0.440884	10.6752	6.31043	0.181938	0		17-03-2014	30	15
2735.61	ML-49	Ol-20	12.1924	39.2554	0.037888	15.8253	0.259644	0.215571	43.4922	0.257629	99.38		0.997166	0.00076093	0.336183	0.00530506	0.00463814	1.64698	0.00701165	2.99913	83.0481		0.21279	43.5468	0.458091	8.21794	6.52834	0.179075	4.74377		17-03-2014	30	15
2735.61	ML-49	Ol-20	18.2924	39.5431	0.081185	13.5644	0.277997	0.16158	45.0793	0.228704	98.9622		0.997792	0.00161965	0.286237	0.00564226	0.00345337	1.69572	0.00618302	2.99742	85.5579		0.212061	20.7732	0.496079	7.89249	8.32478	0.17447	5.27474		17-03-2014	30	15
2735.61	ML-49	Ol-20	24.3924	39.7902	0.060805	13.2064	0.367512	0.191384	45.5568	0.225638	99.4404		0.997685	0.0012054	0.276922	0.00741195	0.00406451	1.70286	0.0060616	2.99744	86.0125		0.211433	28.1041	0.503021	6.11622	6.93909	0.173443	5.22803		17-03-2014	30	15
2735.61	ML-49	Ol-20	30.4924	39.7497	0.054414	13.2322	0.306289	0.168678	45.7615	0.229597	99.5328		0.99588	0.00107785	0.277243	0.00617232	0.00357946	1.70916	0.00616307	3.00017	86.0429		0.211529	30.3301	0.502487	7.24992	8.08158	0.172967	5.28728		17-03-2014	30	15
2735.61	ML-49	Ol-20	36.5924	39.7347	0.078647	13.1376	0.375317	0.181561	45.7663	0.215451	99.5273		0.9953	0.00155755	0.275205	0.00756181	0.00385205	1.70898	0.00578216	2.99936	86.1301		0.211711	19.6977	0.504821	5.85855	7.3488	0.172994	5.57347		17-03-2014	30	15
2735.61	ML-49	Ol-20	42.6924	39.501	0.044254	13.1381	0.350068	0.186053	45.5365	0.227299	99.0143		0.995171	0.000881491	0.276808	0.00709392	0.0039702	1.71024	0.00613543	3.00122	86.0694		0.212353	37.7041	0.505614	6.32003	7.31713	0.173509	5.24937		17-03-2014	30	15
2735.61	ML-49	Ol-20	48.7924	39.6494	0.065798	13.1656	0.372739	0.180107	45.4988	0.196937	99.1592		0.997082	0.00130823	0.27688	0.00753951	0.00383628	1.7057	0.00530615	2.99854	86.0344		0.211885	25.773	0.504463	5.97395	7.47622	0.173609	5.99127		17-03-2014	30	15
2735.61	ML-49	Ol-20	54.8924	39.4698	0.040075	12.9882	0.335314	0.178982	45.514	0.256796	98.8099		0.995844	0.00079942	0.274051	0.0068049	0.00382491	1.71191	0.0069418	3.00097	86.2006		0.212371	40.0506	0.507484	6.71302	7.47518	0.173423	4.36753		17-03-2014	30	15
2735.61	ML-49	Ol-20	60.9924	39.6294	0.068676	13.1516	0.381852	0.187822	45.6039	0.216884	99.2678		0.995707	0.00136425	0.276343	0.00771708	0.00399711	1.70814	0.00583847	2.99993	86.0748		0.211917	23.7854	0.504733	5.85051	7.2511	0.173366	5.45037		17-03-2014	30	15
[truncated: 4,421 more rows]
[truncated: 23 more columns]

## Sheet: 3-Pyroxene comp data
Supplementary Data Table_S3: Pyroxene electron microprobe data
[truncated: 983 more rows]
[truncated: 34 more columns]

## Sheet: 4-Plagioclase data
Supplementary Data Table_S4: Plagioclase electron microprobe data
[truncated: 178 more rows]

[truncated: 8 more sheets: 5-Cr-spinel data, 6-Whole rock data, 7-Glass data, 8-Melt inclusion compositions, 9-EBSD data, 10-Olivine timescale data, 11-Seismic record , 12-Mauna Loa glass data]
